# Supplementary material for: Contribution to the Synthesis, Characterization, Separation and Quantification of New N-Acyl Thiourea Derivatives with Antimicrobial and Antioxidant Potential
Source: MDPI journal article supplement (doi:10.3390/pharmaceutics15102501), 2023-10-20
Supplement: s1 [file s1]

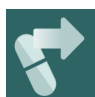

# RP-HPLC Method Validation for Separation and Quantitative Determination of compounds **1h**, **1j**, **1i**, **1m**, **1g**, and **1n** Analytical Report

## 1. SCOPE

The aim of the validation of an analytical procedure is to demonstrate that it is suitable for its intended purpose. A reversed-phase high-performance liquid chromatography (RP-HPLC) method used for separation and quantitative determination of compounds **1h**, **1j**, **1i**, **1m**, **1g**, **1n** was developed and validated.

## 2. DESCRIPTION OF THE METHOD

Principle of the method: A reversed-phase high-performance liquid chromatography (RP-HPLC) method for separation and quantitative determination of **compounds 1h, 1j, 1i, 1m, 1g, and 1n** has been developed and validated.

Reagents:

- Water for chromatographic use;
- Acetonitrile;
- Methanol;
- Triethylamine;
- Ortho-phosphoric acid;

Equipment:

- Waters Alliance HPLC system, or equivalent, comprised of the following modules:
  - 2695 + 2998 separation module;
  - 998 PDA detector;
  - PC equipped with “Empower 3, PDA Software”;
- Mettler Toledo analytical balance;
- pH meter inoLab pH7310P.

#### Chromatographic conditions:

- Column: stationary phase: octadecylsilica gel C18; length: 250 mm; internal diameter: 4.6 mm; particle size: 5  $\mu$ m (Inertsil ODS-3, 5  $\mu$ m, 250 x 4.6 mm);
- Flow rate: 1.0 mL/ min;
- Detection:  $\lambda$ =275 nm;
- Injection volume: 10  $\mu$ L;
- Run time: 35 minutes;
- Column temperature: room temperature;
- Sample temperature: room temperature;
- Elution: isocratic.
- *Mobile phase*: Solvent A: Solvent B (93: 7, V/V), where,
  - *Solvent A*: 200 mL mixture of water R and 800 mL acetonitrile R (20: 80, V/ V) are mixed together, 0.7 mL triethylamine R is added, and the pH is adjusted to 3.3 with ortho-phosphoric acid R. The obtained solution is filtered and sonicated for around one hour before use.
  - *Solvent B*: Water R (of chromatographic use).

#### Preparation of solutions:

Stock solutions of 500  $\mu$ g/ mL are prepared from each of the tested compounds:

*Stock solution 1h* (500  $\mu$ g/ mL): 5 mg compound **1h** were transferred into a 10 mL volumetric flask, 5 mL acetonitrile R were added, the flask was sonicated for 5 minutes, cooled to room temperature and diluted to volume with acetonitrile R.

*Stock solution 1j* (500  $\mu$ g/ mL): 5 mg compound **1j** were transferred into a 10 mL volumetric flask, 5 mL acetonitrile R were added, the flask was sonicated for 5 minutes, cooled to room temperature and diluted to volume with acetonitrile R.

*Stock solution 1i* (500  $\mu$ g/ mL): 5 mg compound **1i** were transferred into a 10 mL volumetric flask, 5 mL acetonitrile R were added, the flask was sonicated for 5 minutes, cooled to room temperature and diluted to volume with acetonitrile R.

*Stock solution 1m* (500  $\mu$ g/ mL): 5 mg compound **1m** were transferred into a 10 mL volumetric flask, 5 mL acetonitrile R were added, the flask was sonicated for 5 minutes, cooled to room temperature and

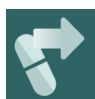

diluted to volume with acetonitrile R.

*Stock solution 1g* (500  $\mu\text{g}/\text{mL}$ ): 5 mg compound **1g** were transferred into a 10 mL volumetric flask, 5 mL acetonitrile R were added, the flask was sonicated for 5 minutes, cooled to room temperature and diluted to volume with acetonitrile R.

*Stock solution 1n* (500  $\mu\text{g}/\text{mL}$ ): 5 mg compound **1n** were transferred into a 10 mL volumetric flask, 5 mL acetonitrile R were added, the flask was sonicated for 5 minutes, cooled to room temperature and diluted to volume with acetonitrile R.

From the stock solutions, suitable dilutions were made in order to perform the validation of the analytical procedure.

#### System suitability:

The system suitability is checked by investigating the retention time of the main peaks due to tested compounds, resolution, theoretical plates, and symmetry factors.

## 6. ACCEPTANCE CRITERIA AND VALIDATION STAGES DESCRIPTION

For the validation of the afore described analytical method, the following parameters were evaluated:

- Specificity;
- Precision;
- LOD – LOQ;
- Linearity and range;
- Accuracy;
- Robustness.

**Table S1.** Acceptance criteria for proposed analytical method

| Validation characteristic | Experimental details                                                                                                                                              | Acceptance criteria            |
|---------------------------|-------------------------------------------------------------------------------------------------------------------------------------------------------------------|--------------------------------|
| <b>Specificity</b>        | No interference between the analytic signal of tested compounds and the analytic signal of solvent                                                                | -                              |
| <b>Precision</b>          | A minimum of 6 samples                                                                                                                                            | $RSD \leq 2\%$                 |
| <b>LOD – LOQ</b>          | Correlation coefficient                                                                                                                                           | $R^2 \geq 0.99$                |
| <b>Linearity</b>          | Correlation coefficient                                                                                                                                           | $R^2 \geq 0.99$                |
| <b>Range</b>              | LOQ – 6.0 $\mu\text{g/mL}$ of each validated compound                                                                                                             | $R^2 \geq 0.99$                |
| <b>Accuracy</b>           | At least 9 determinations over 3 concentration levels                                                                                                             | Mean recovery within 98 – 102% |
| <b>Robustness</b>         | The influence of small variations in chromatographic conditions on compounds 1h, 1j, 1i, 1m, 1g, 1n for analytical method efficiency (retention time, resolution) | Resolution $\geq 2$            |

Acceptance criteria



## SPECIFICITY

Specificity is the ability to assess unequivocally the analyte in the presence of components which may be expected to be present.

In order to demonstrate the specificity of the method, the following solutions were prepared and analyzed:

- Solvent;
- Reference Solution;
- Identification solutions;

### Preparation of solutions:

Stock solutions of 500  $\mu\text{g}/\text{mL}$  are prepared from each of the tested compounds:

*Stock solution 1h (500  $\mu\text{g}/\text{mL}$ ):* 5 mg compound **1h** were transferred into a 10 mL volumetric flask, 5 mL acetonitrile R were added, the flask was sonicated for 5 minutes, cooled to room temperature and diluted to volume with acetonitrile R.

*Stock solution 1j (500  $\mu\text{g}/\text{mL}$ ):* 5 mg compound **1j** were transferred into a 10 mL volumetric flask, 5 mL acetonitrile R were added, the flask was sonicated for 5 minutes, cooled to room temperature and diluted to volume with acetonitrile R.

*Stock solution 1i (500  $\mu\text{g}/\text{mL}$ ):* 5 mg compound **1i** were transferred into a 10 mL volumetric flask, 5 mL acetonitrile R were added, the flask was sonicated for 5 minutes, cooled to room temperature and diluted to volume with acetonitrile R.

*Stock solution 1m (500  $\mu\text{g}/\text{mL}$ ):* 5 mg compound **1m** were transferred into a 10 mL volumetric flask, 5 mL acetonitrile R were added, the flask was sonicated for 5 minutes, cooled to room temperature and diluted to volume with acetonitrile R.

*Stock solution 1g (500  $\mu\text{g}/\text{mL}$ ):* 5 mg compound **1g** were transferred into a 10 mL volumetric flask, 5 mL acetonitrile R were added, the flask was sonicated for 5 minutes, cooled to room temperature and diluted to volume with acetonitrile R.

*Stock solution 1n (500  $\mu\text{g}/\text{mL}$ ):* 5 mg compound **1n** were transferred into a 10 mL volumetric flask, 5 mL acetonitrile R were added, the flask was sonicated for 5 minutes, cooled to room temperature and diluted to volume with acetonitrile R.

From the stock solutions, 0.25 mL were diluted to 25 mL with methanol R in order to obtain identification solutions of 5  $\mu\text{g}/\text{mL}$ .

### Procedure:

The following sequence is used: *MeOH*, *S<sub>1h</sub>*, *S<sub>1j</sub>*, *S<sub>1i</sub>*, *S<sub>1m</sub>*, *S<sub>1g</sub>*, *S<sub>1n</sub>*, where:

*MeOH* = Methanol – the solvent used for samples preparation;

*S<sub>1h</sub>* = 5 µg/ mL solution **1h**;

*S<sub>1j</sub>* = 5 µg/ mL solution **1j**;

*S<sub>1i</sub>* = 5 µg/ mL solution **1i**;

*S<sub>1m</sub>* = 5 µg/ mL solution **1m**;

*S<sub>1g</sub>* = 5 µg/ mL solution **1g**;

*S<sub>1n</sub>* = 5 µg/ mL solution **1n**.

### Results:

There was no detectable influence of solvent – methanol (**Figure S1**) on the identification of compounds **1h**, **1j**, **1i**, **1m**, **1g**, and **1n**.

Purity angles of all peaks recorded in the solutions chromatograms are below their corresponding thresholds, indicating proper separation of the compounds (**Figures S2 – S9**).

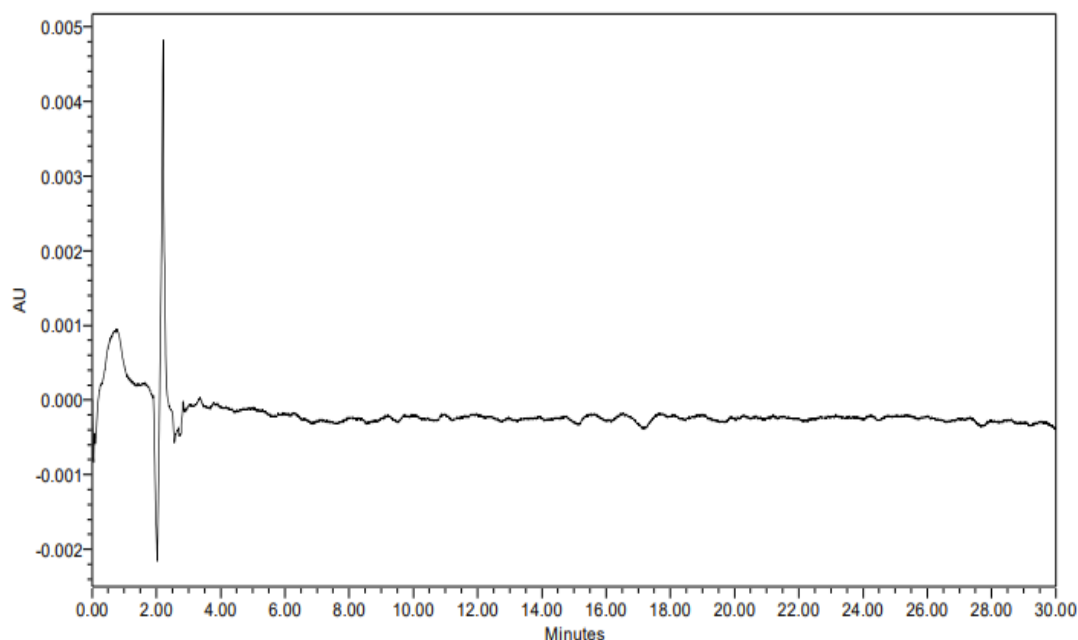

**Figure S1.** Chromatogram registered with the solvent used for samples preparation (methanol)

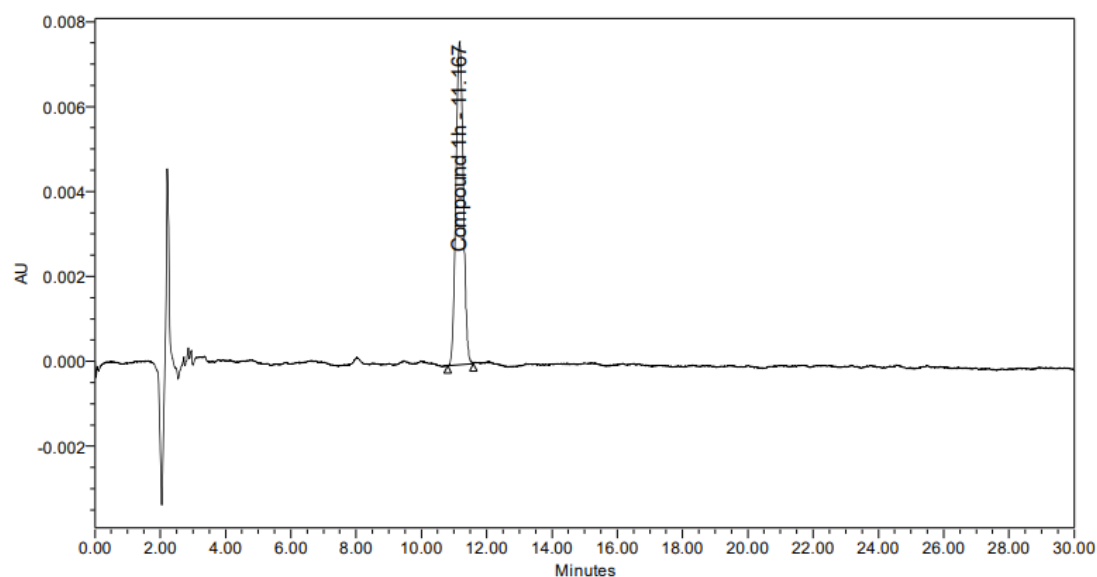

|   | Peak Name   | RT     | Area   | Height (μV) | Purity1 Angle | Purity1 Threshold | Symmetry Factor | EP Plate Count |
|---|-------------|--------|--------|-------------|---------------|-------------------|-----------------|----------------|
| 1 | Compound 1h | 11.167 | 119025 | 7615        | 0.299         | 0.650             | 1.06            | 1.135571e+004  |

(a)

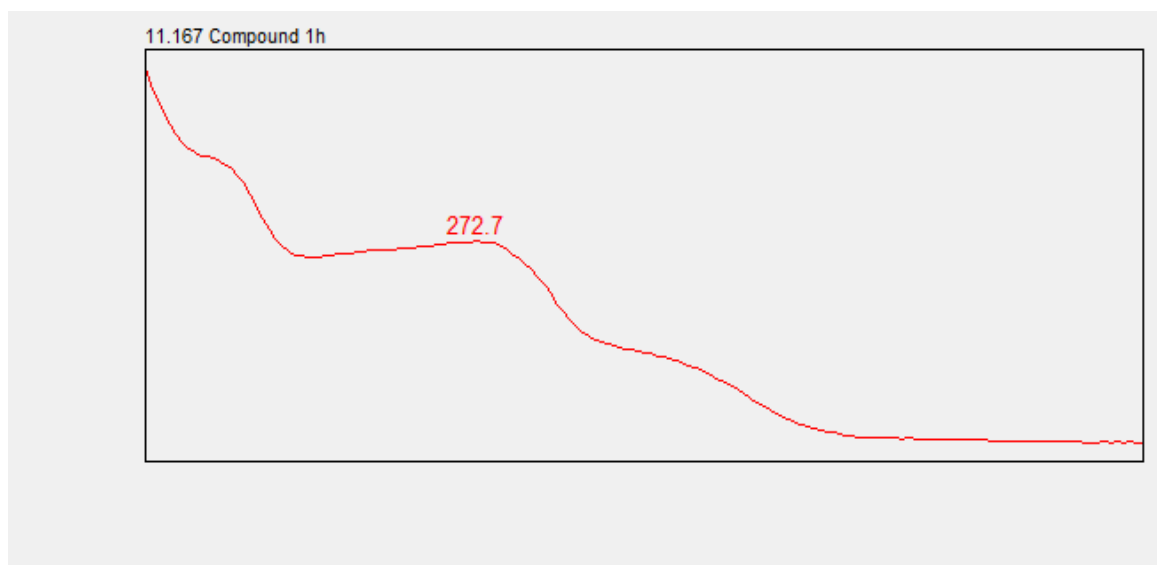

(b)

**Figure S2. (a)** Chromatogram registered with 5  $\mu\text{g}/\text{mL}$  **1h** solution;  
**(b)** UV spectrum of compound **1h**

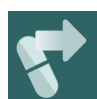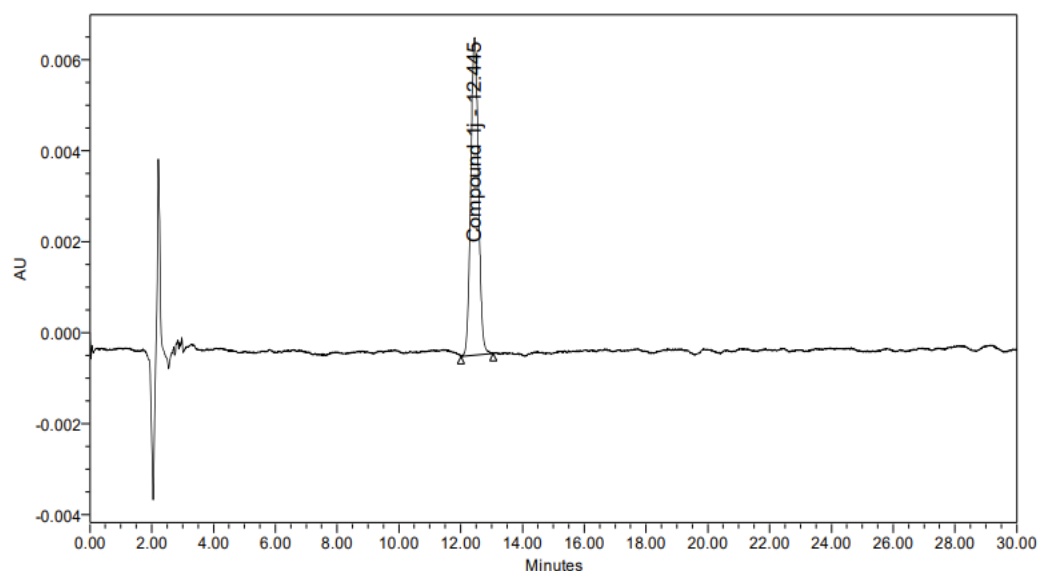

|   | Peak Name   | RT     | Area   | Height (μV) | Purity1 Angle | Purity1 Threshold | Symmetry Factor | EP Plate Count |
|---|-------------|--------|--------|-------------|---------------|-------------------|-----------------|----------------|
| 1 | Compound 1j | 12.445 | 122578 | 6978        | 0.387         | 0.642             | 1.07            | 1.134319e+004  |

(a)

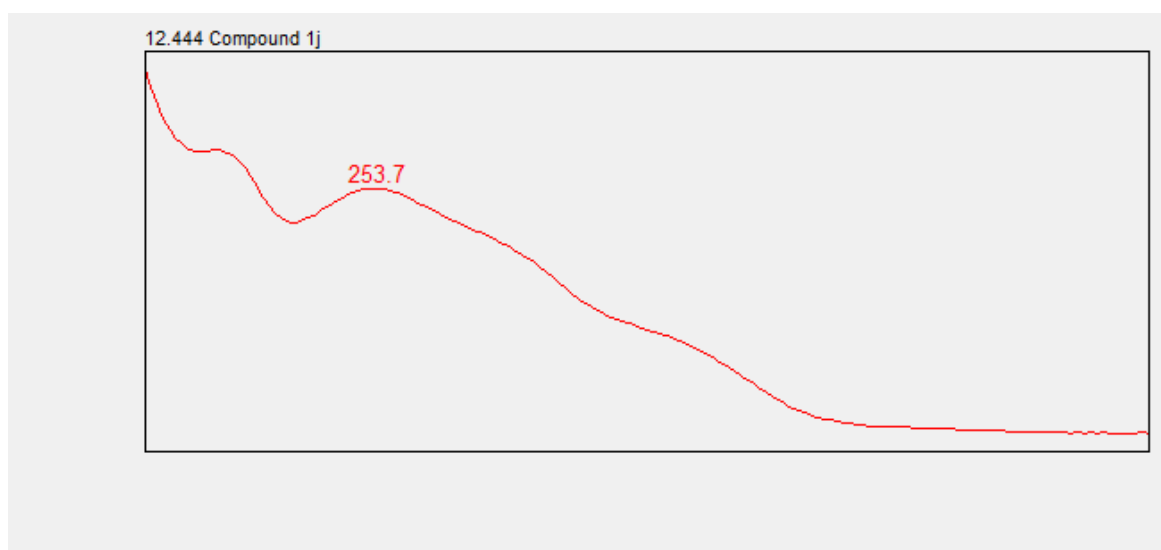

(b)

**Figure S3.** (a) Chromatogram registered with 5  $\mu\text{g}/\text{mL}$  **1j** solution;  
(b) UV spectrum of compound **1j**

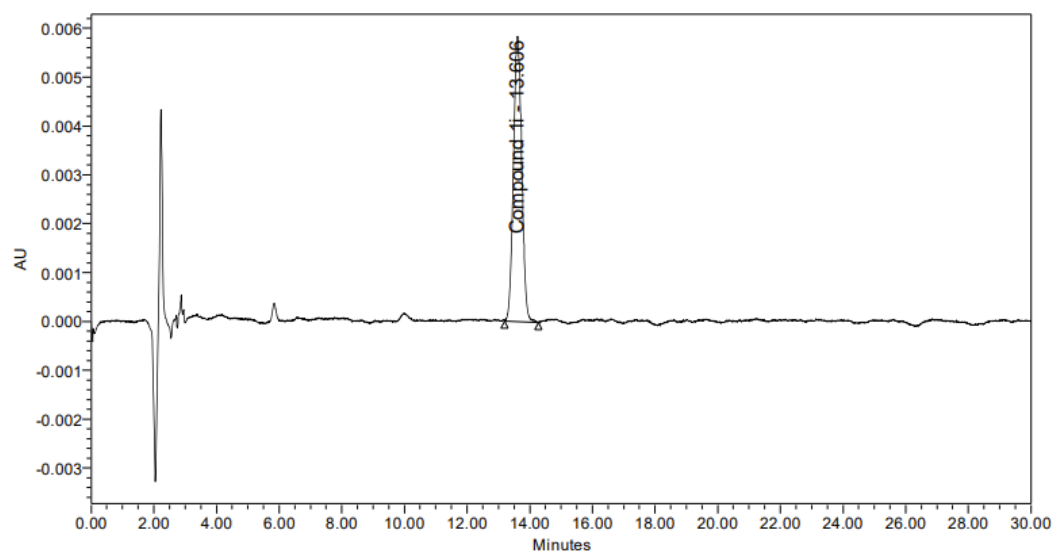

|   | Peak Name   | RT     | Area   | Height<br>( $\mu$ V) | Purity1<br>Angle | Purity1<br>Threshold | Symmetry Factor | EP Plate Count |
|---|-------------|--------|--------|----------------------|------------------|----------------------|-----------------|----------------|
| 1 | Compound 1i | 13.606 | 110199 | 5835                 | 0.337            | 0.636                | 1.07            | 1.165344e+004  |

(a)

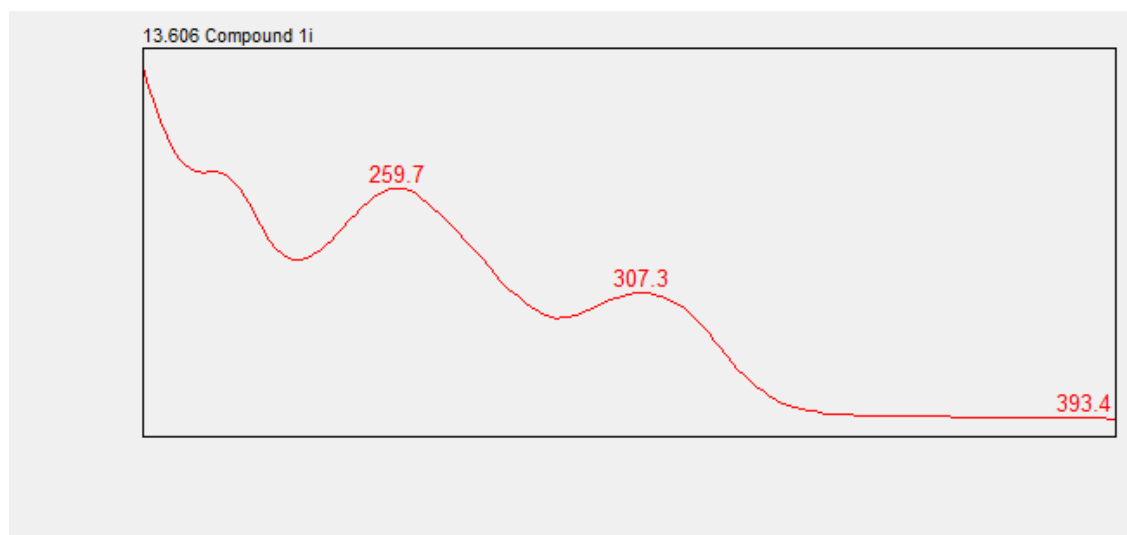

(b)

**Figure S4.** (a) Chromatogram registered with 5  $\mu$ g/ mL **1i** solution;  
(b) UV spectrum of compound **1i**

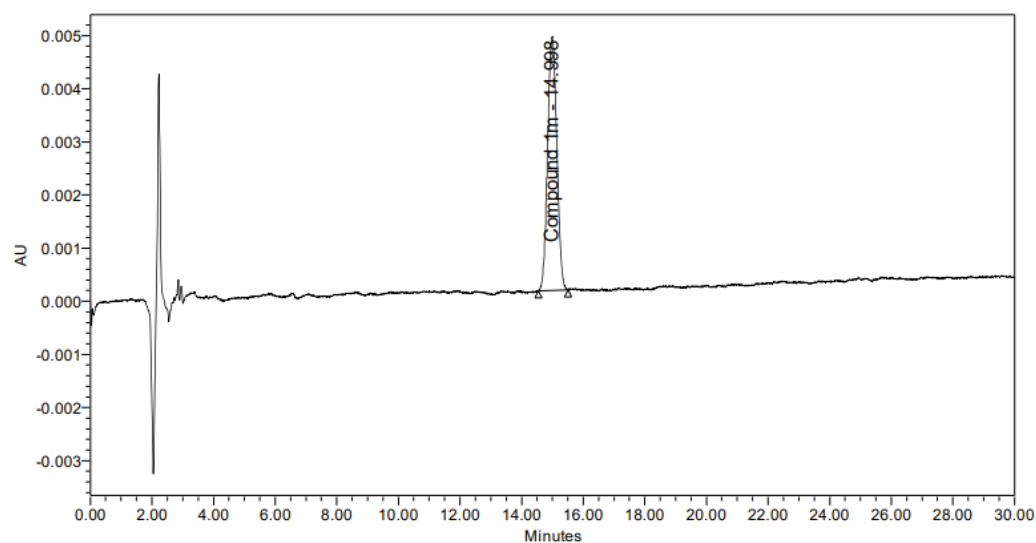

|   | Peak Name   | RT     | Area  | Height<br>( $\mu$ V) | Purity1<br>Angle | Purity1<br>Threshold | Symmetry Factor | EP Plate Count |
|---|-------------|--------|-------|----------------------|------------------|----------------------|-----------------|----------------|
| 1 | Compound 1m | 14.998 | 99488 | 4779                 | 0.380            | 0.604                | 1.02            | 1.145172e+004  |

(a)

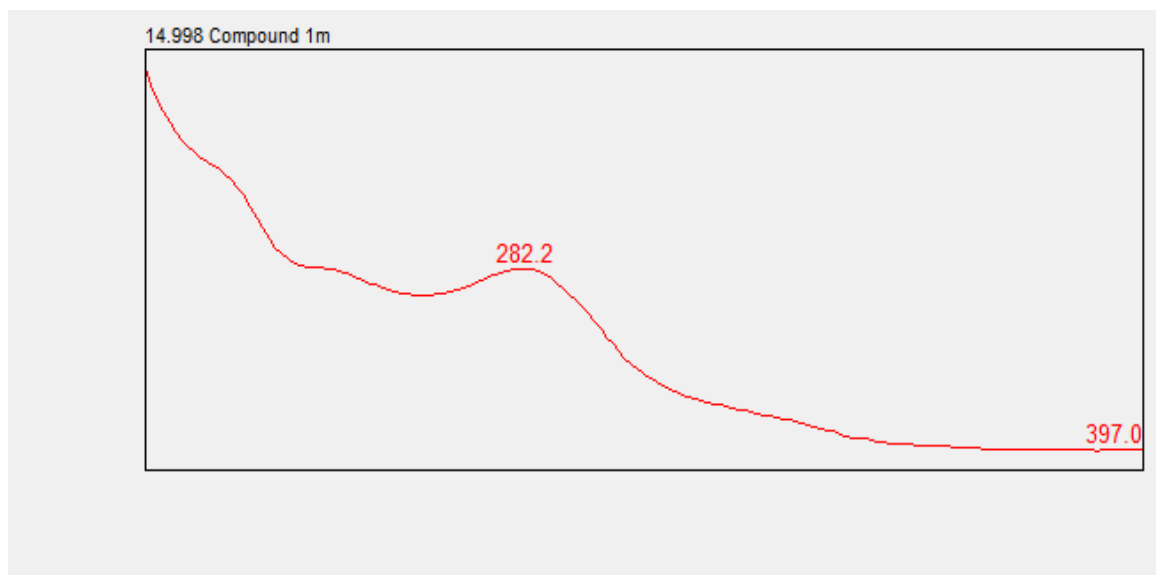

(b)

**Figure S5. (a)** Chromatogram registered with 5  $\mu$ g/ mL **1m** solution;  
**(b)** UV spectrum of compound **1m**

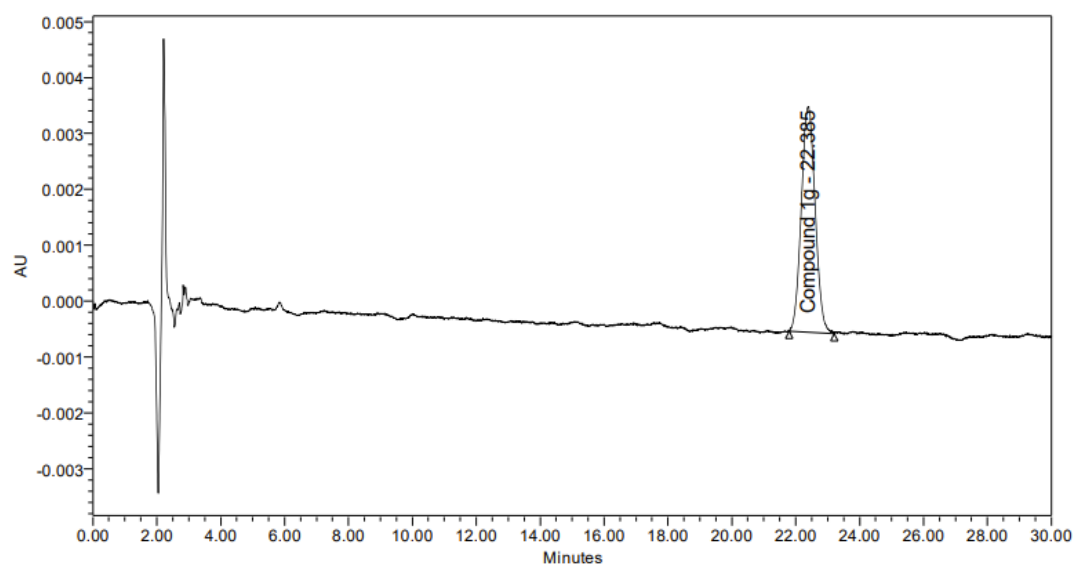

|   | Peak Name   | RT     | Area   | Height<br>( $\mu$ V) | Purity1<br>Angle | Purity1<br>Threshold | Symmetry Factor | EP Plate Count |
|---|-------------|--------|--------|----------------------|------------------|----------------------|-----------------|----------------|
| 1 | Compound 1g | 22.385 | 122960 | 4032                 | 0.785            | 1.369                | 1.07            | 1.209107e+004  |

(a)

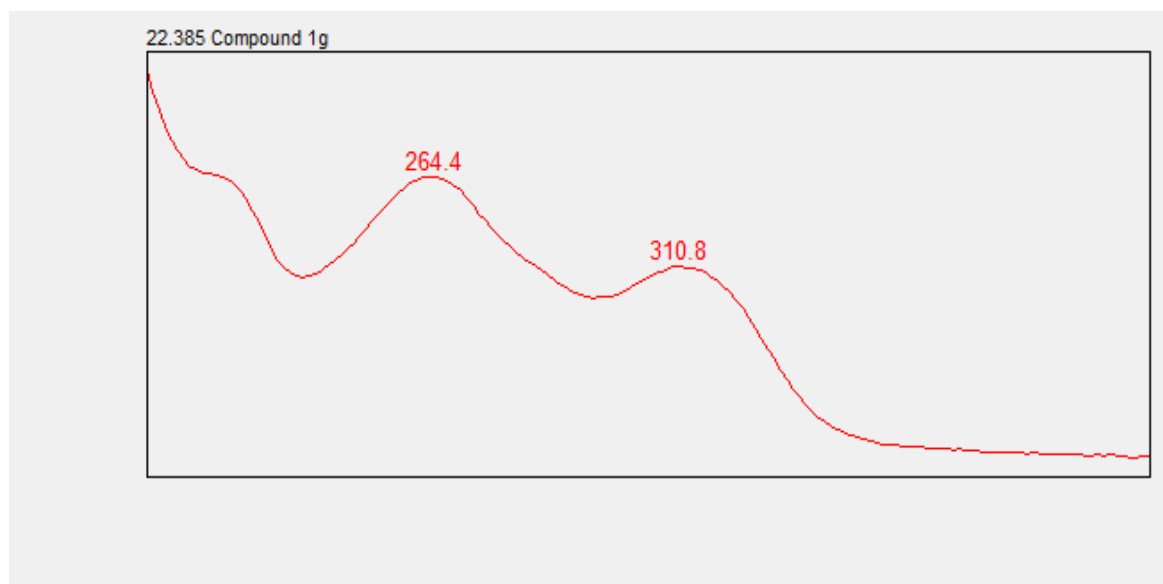

(b)

**Figure S6. (a)** Chromatogram registered with 5  $\mu$ g/ mL **1g** solution;  
**(b)** UV spectrum of compound **1g**

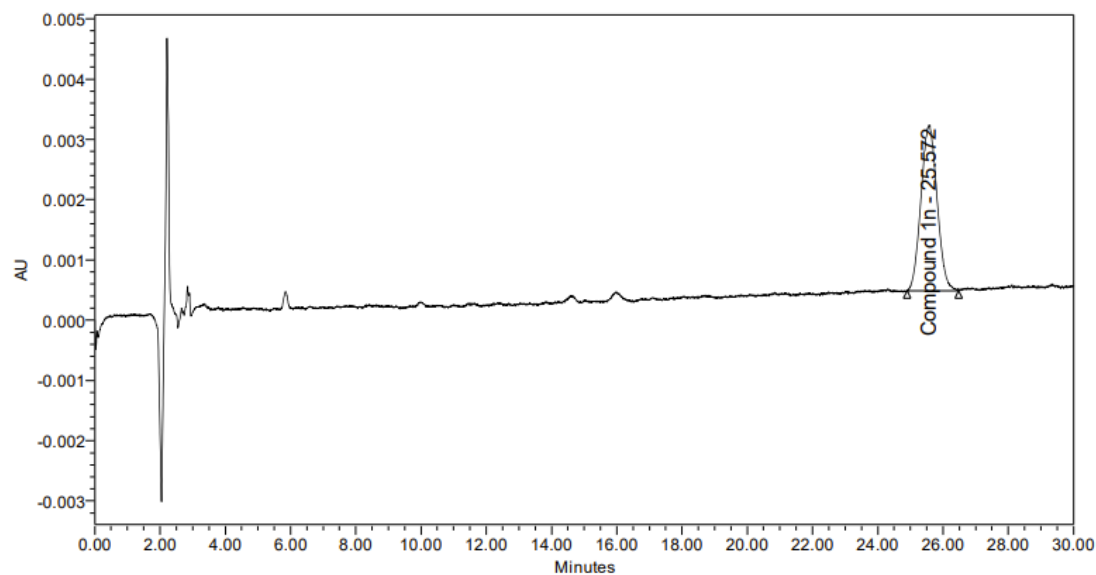

|   | Peak Name   | RT     | Area  | Height<br>( $\mu$ V) | Purity1<br>Angle | Purity1<br>Threshold | Symmetry Factor | EP Plate Count |
|---|-------------|--------|-------|----------------------|------------------|----------------------|-----------------|----------------|
| 1 | Compound 1n | 25.572 | 95177 | 2744                 | 0.693            | 1.463                | 1.05            | 1.208410e+004  |

(a)

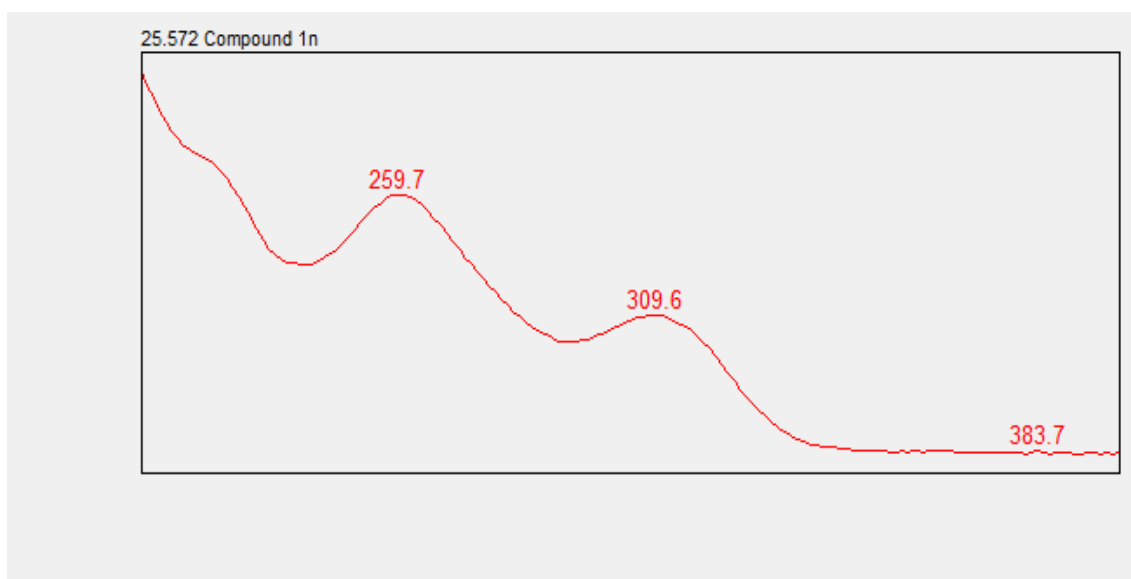

(b)

**Figure S7. (a)** Chromatogram registered with 5  $\mu$ g/ mL **1n** solution;  
**(b)** UV spectrum of compound **1n**



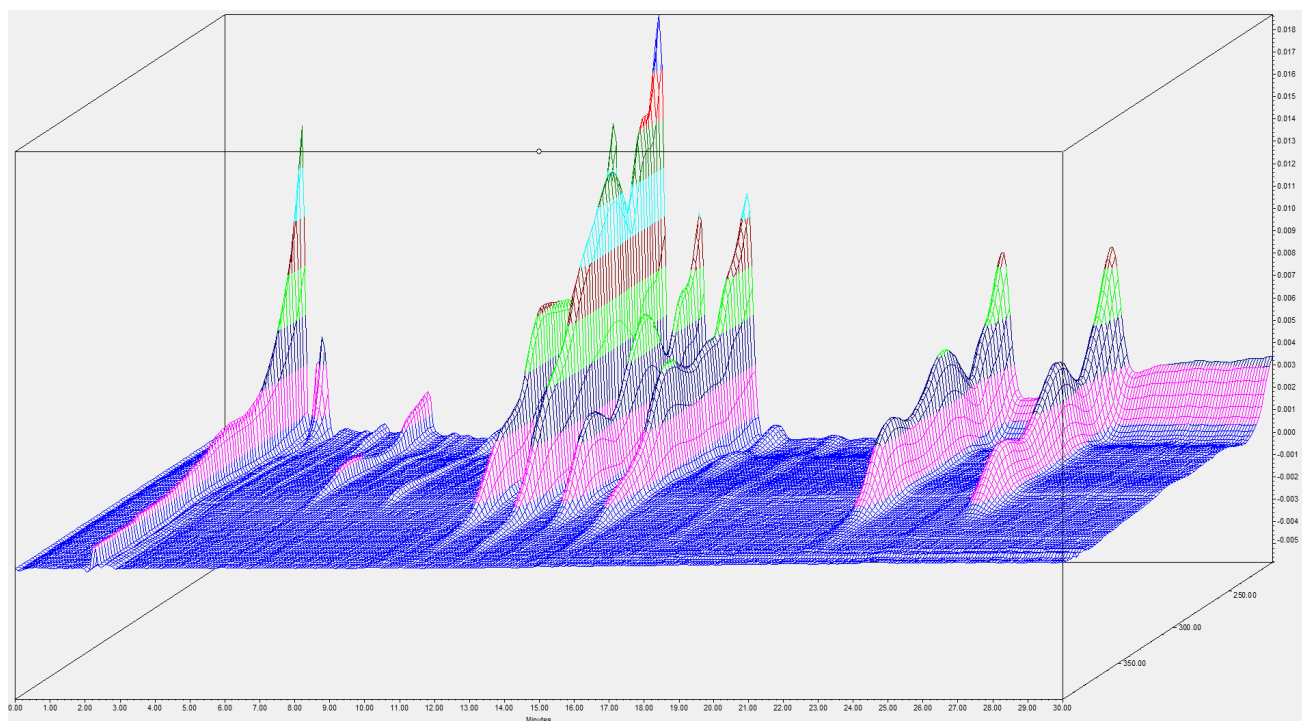

**Figure S8.** 3D Plot of compounds **1h**, **1j**, **1i**, **1m**, **1g**, and **1n**

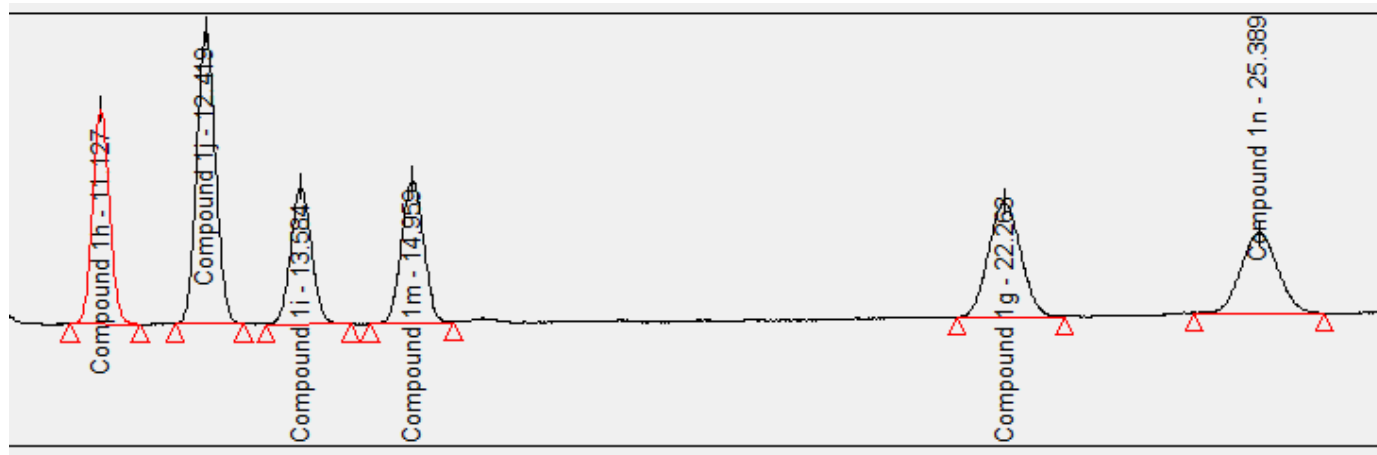

**Figure S9.** Typical chromatogram depicting **1h**, **1j**, **1i**, **1m**, **1g**, and **1n** peaks, for the proposed RP-HPLC separation method

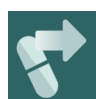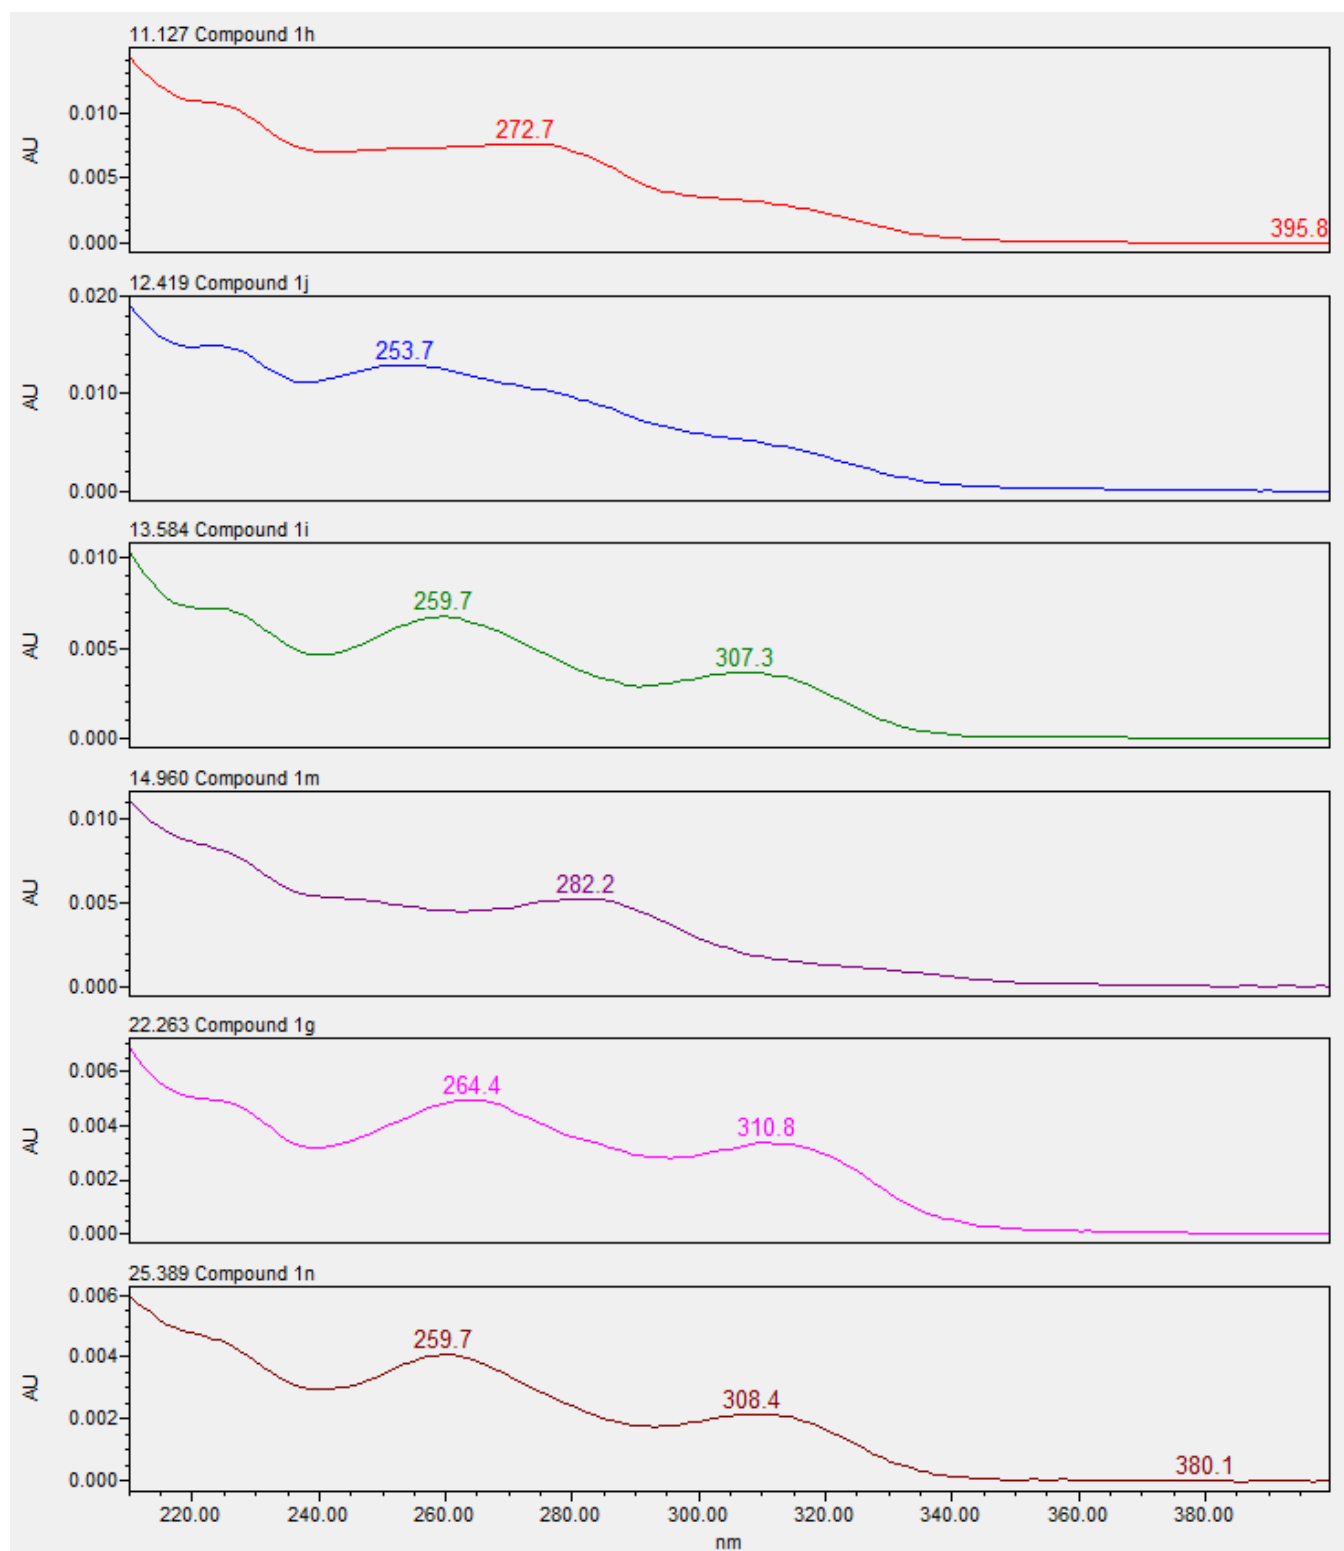

Figure S10. UV Spectra of the chemical compounds **1h**, **1j**, **1i**, **1m**, **1g**, and **1n**

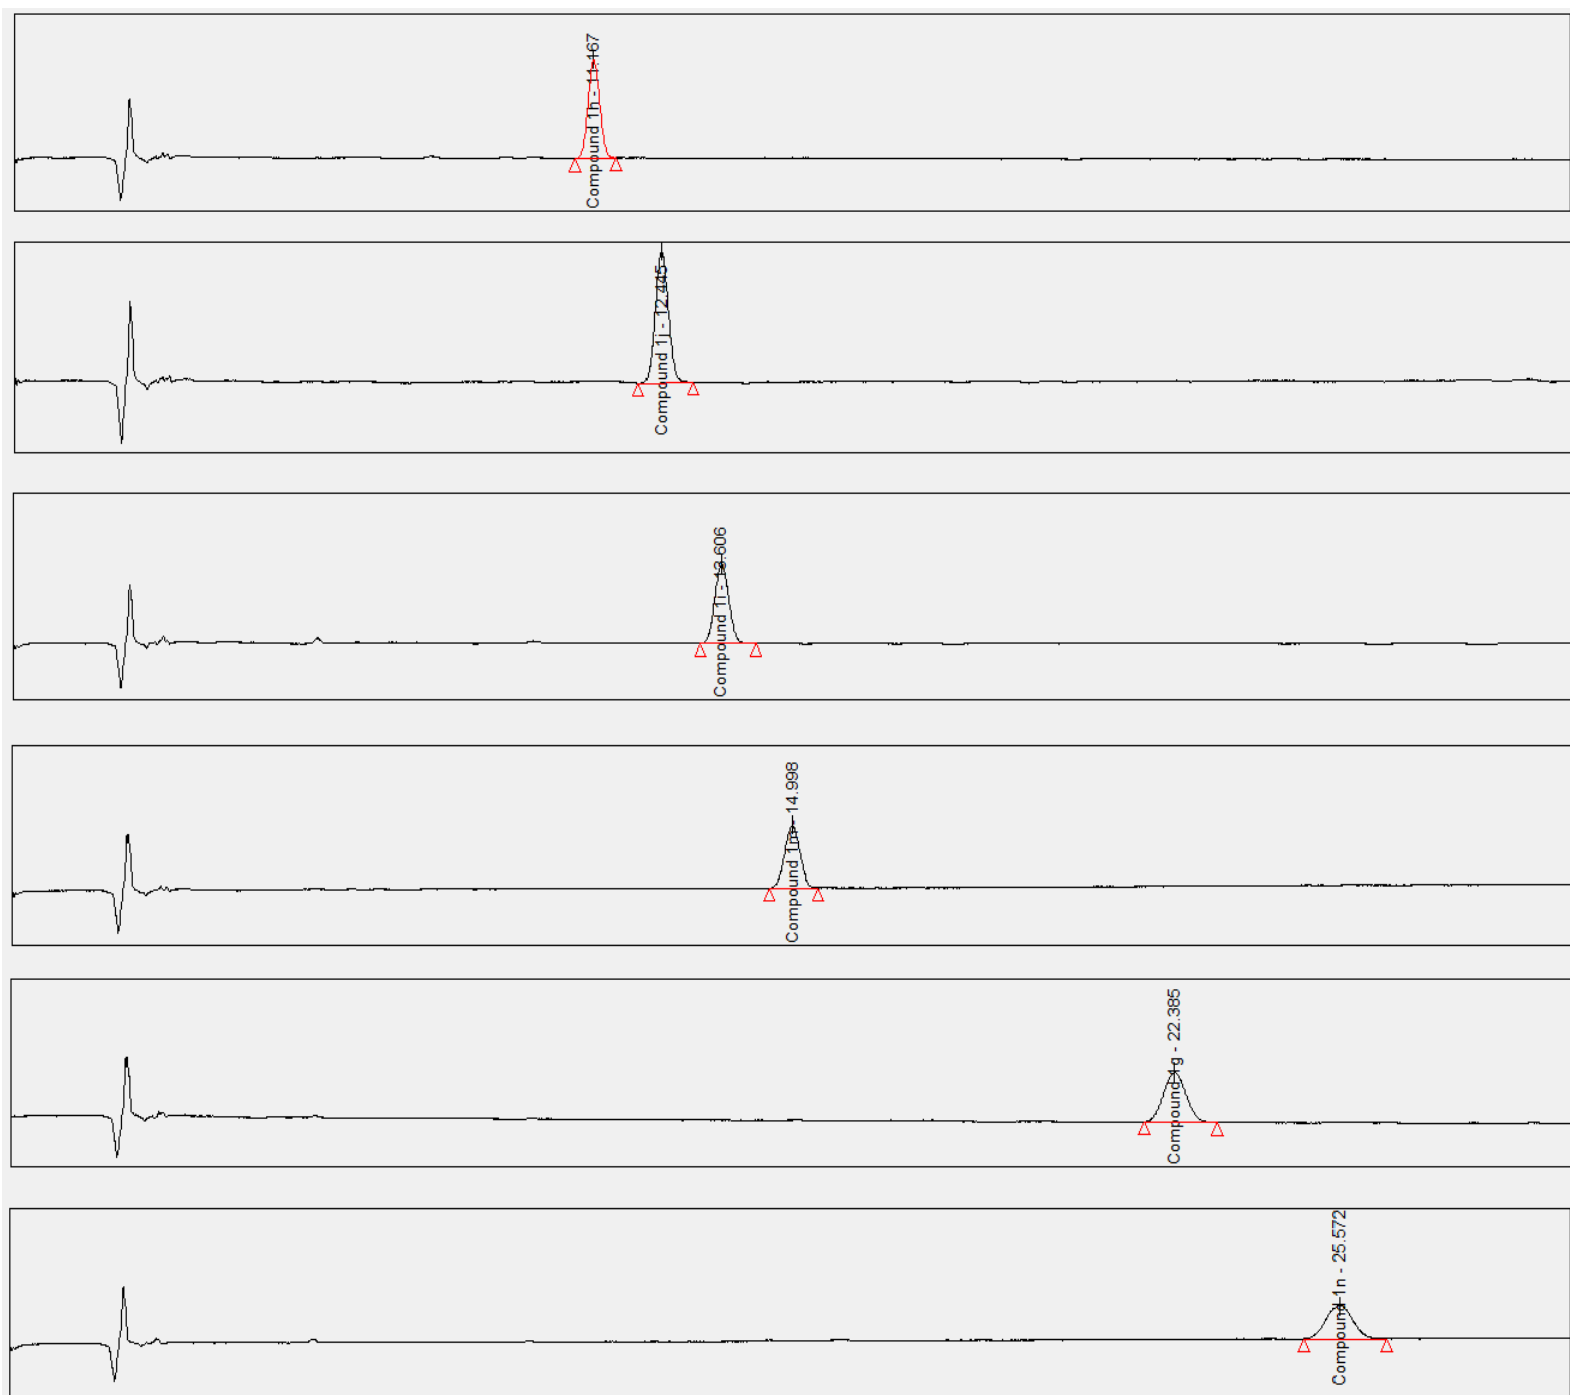

**Figure S11.** Identification chromatograms depicting **1h**, **1j**, **1i**, **1m**, **1g**, and **1n** peaks, registered following the proposed RP-HPLC separation method conditions

## PRECISION

The precision of an analytical procedure expresses the closeness of agreement (degree of scatter) between a series of measurements obtained from multiple sampling of the same homogeneous sample under the prescribed conditions.

Precision may be considered at three levels: repeatability, intermediate precision and reproducibility. Precision should be investigated using homogeneous, authentic samples. However, if it is not possible to obtain a homogeneous sample, it may be investigated using artificially prepared samples or a sample solution.

The precision of an analytical procedure is usually expressed as the variance, standard deviation or coefficient of variation of a series of measurements.

### ***Repeatability***

Repeatability expresses the precision under the same operating conditions over a short interval of time. Repeatability is also termed intra-assay precision.

### ***Intermediate precision***

Intermediate precision expresses within-laboratories variations: different days, different analysts, different equipment etc.

### ***Reproducibility***

Reproducibility expresses the precision between laboratories (collaborative studies, usually applied to standardization of methodology).

### **Precision (Repeatability):**

In order to demonstrate the precision of the method for *the validation of separation and quantitative determination of compounds 1h, 1j, 1i, 1m, 1g, and 1n*, the following solution was prepared and analyzed in 2 different days:

- *Test solution* (5 µg/ mL compound **1h**, 5 µg/ mL compound **1j**, 5 µg/ mL compound **1i**, 5 µg/ mL compound **1m**, 5 µg/ mL compound **1g**, 5 µg/ mL compound **1n**).

### Preparation of solutions:

Stock solutions of 500 µg/ mL are prepared from each of the tested compounds:

*Stock solution 1h (500 µg/ mL):* 5 mg compound **1h** were transferred into a 10 mL volumetric flask, 5 mL acetonitrile R were added, the flask was sonicated for 5 minutes, cooled to room temperature and diluted to volume with acetonitrile R.



*Stock solution 1j* (500  $\mu\text{g}/\text{mL}$ ): 5 mg compound **1j** were transferred into a 10 mL volumetric flask, 5 mL acetonitrile R were added, the flask was sonicated for 5 minutes, cooled to room temperature and diluted to volume with acetonitrile R.

*Stock solution 1i* (500  $\mu\text{g}/\text{mL}$ ): 5 mg compound **1i** were transferred into a 10 mL volumetric flask, 5 mL acetonitrile R were added, the flask was sonicated for 5 minutes, cooled to room temperature and diluted to volume with acetonitrile R.

*Stock solution 1m* (500  $\mu\text{g}/\text{mL}$ ): 5 mg compound **1m** were transferred into a 10 mL volumetric flask, 5 mL acetonitrile R were added, the flask was sonicated for 5 minutes, cooled to room temperature and diluted to volume with acetonitrile R.

*Stock solution 1g* (500  $\mu\text{g}/\text{mL}$ ): 5 mg compound **1g** were transferred into a 10 mL volumetric flask, 5 mL acetonitrile R were added, the flask was sonicated for 5 minutes, cooled to room temperature and diluted to volume with acetonitrile R.

*Stock solution 1n* (500  $\mu\text{g}/\text{mL}$ ): 5 mg compound **1n** were transferred into a 10 mL volumetric flask, 5 mL acetonitrile R were added, the flask was sonicated for 5 minutes, cooled to room temperature and diluted to volume with acetonitrile R.

*Test solution* (5  $\mu\text{g}/\text{mL}$  compound **1h**, 5  $\mu\text{g}/\text{mL}$  compound **1j**, 5  $\mu\text{g}/\text{mL}$  compound **1i**, 5  $\mu\text{g}/\text{mL}$  compound **1m**, 5  $\mu\text{g}/\text{mL}$  compound **1g**, 5  $\mu\text{g}/\text{mL}$  compound **1n**): 0.25 mL of each stock solution were diluted to 25 mL with methanol R.

*Test solution* was prepared six times.

#### Procedure:

The following sequence was used: TS<sub>1</sub>, TS<sub>2</sub>, TS<sub>3</sub>, TS<sub>4</sub>, TS<sub>5</sub>, TS<sub>6</sub>,

Where:

TS<sub>x</sub> – Test solution.

## Results:

The experimental results are presented in the following tables (Tables S2 – S4).

**Table S2.** Precision results for compounds **1h**, **1j**, **1i**, **1m**, **1g**, **1n** – 5 µg/ mL solution – first day

| Precision (I) results for compounds <b>1h</b> , <b>1j</b> , <b>1i</b> , <b>1m</b> , <b>1g</b> , <b>1n</b> – 5 µg/ mL solution |                    |           |                    |           |                    |           |                    |           |                    |           |                    |           |
|-------------------------------------------------------------------------------------------------------------------------------|--------------------|-----------|--------------------|-----------|--------------------|-----------|--------------------|-----------|--------------------|-----------|--------------------|-----------|
| Sample No.                                                                                                                    | Compound <b>1h</b> |           | Compound <b>1j</b> |           | Compound <b>1i</b> |           | Compound <b>1m</b> |           | Compound <b>1g</b> |           | Compound <b>1n</b> |           |
|                                                                                                                               | Ret. Time          | Peak Area |
|                                                                                                                               | [min.]             | [µV*sec]  |
| 1.                                                                                                                            | 11.270             | 111,591   | 12.596             | 169,135   | 13.789             | 82,009    | 15.167             | 97,170    | 22.721             | 108,491   | 25.932             | 84,215    |
| 2.                                                                                                                            | 11.272             | 111,110   | 12.602             | 168,465   | 13.801             | 82,735    | 15.168             | 96,179    | 22.742             | 109,245   | 25.950             | 84,630    |
| 3.                                                                                                                            | 11.276             | 111,024   | 12.612             | 168,231   | 13.818             | 82,661    | 15.178             | 96,381    | 22.766             | 108,577   | 25.974             | 82,741    |
| 4.                                                                                                                            | 11.281             | 110,663   | 12.614             | 168,785   | 13.816             | 82,849    | 15.190             | 95,668    | 22.768             | 107,246   | 25.991             | 83,968    |
| 5.                                                                                                                            | 11.286             | 110,997   | 12.620             | 169,796   | 13.824             | 82,632    | 15.196             | 97,012    | 22.779             | 108,996   | 26.003             | 84,959    |
| 6.                                                                                                                            | 11.293             | 110,417   | 12.632             | 166,835   | 13.836             | 82,261    | 15.197             | 96,243    | 22.789             | 106,276   | 26.013             | 83,531    |
| Average                                                                                                                       | 11.280             | 110,967   | 12.613             | 168,541   | 13.814             | 82,525    | 15.183             | 96,442    | 22.761             | 108,138   | 25.977             | 84,007    |
| <sup>1</sup> SD                                                                                                               | 0.009              | 402       | 0.013              | 1000      | 0.017              | 321       | 0.014              | 560       | 0.025              | 1144      | 0.031              | 796       |
| <sup>2</sup> RSD %                                                                                                            | 0.08               | 0.36      | 0.10               | 0.59      | 0.12               | 0.39      | 0.09               | 0.58      | 0.11               | 1.06      | 0.12               | 0.95      |

<sup>1</sup> Standard deviation

<sup>2</sup> Relative standard deviation, %

**Table S3.** Precision results for compounds **1h**, **1j**, **1i**, **1m**, **1g**, **1n** – 5 µg/ mL solution – different day

| Precision (II) results for compounds <b>1h</b> , <b>1j</b> , <b>1i</b> , <b>1m</b> , <b>1g</b> , <b>1n</b> – 5 µg/ mL solution |                    |           |                    |           |                    |           |                    |           |                    |           |                    |           |
|--------------------------------------------------------------------------------------------------------------------------------|--------------------|-----------|--------------------|-----------|--------------------|-----------|--------------------|-----------|--------------------|-----------|--------------------|-----------|
| Sample No.                                                                                                                     | Compound <b>1h</b> |           | Compound <b>1j</b> |           | Compound <b>1i</b> |           | Compound <b>1m</b> |           | Compound <b>1g</b> |           | Compound <b>1n</b> |           |
|                                                                                                                                | Ret. Time          | Peak Area |
|                                                                                                                                | [min.]             | [µV*sec]  |
| 1.                                                                                                                             | 11.142             | 110,842   | 12.456             | 168,780   | 13.649             | 80,744    | 15.006             | 97,663    | 22.563             | 106,865   | 25.801             | 83,077    |
| 2.                                                                                                                             | 11.330             | 109,970   | 12.672             | 166,002   | 13.886             | 79,884    | 15.250             | 97,797    | 22.896             | 106,337   | 26.148             | 81,794    |
| 3.                                                                                                                             | 11.306             | 109,387   | 12.646             | 165,117   | 13.853             | 79,171    | 15.209             | 96,058    | 22.831             | 104,014   | 26.056             | 82,753    |
| 4.                                                                                                                             | 11.281             | 114,244   | 12.615             | 172,220   | 13.805             | 81,127    | 15.179             | 98,678    | 22.722             | 108,103   | 25.945             | 80,985    |
| 5.                                                                                                                             | 11.261             | 111,967   | 12.585             | 166,791   | 13.783             | 82,099    | 15.138             | 98,075    | 22.681             | 108,183   | 25.875             | 84,121    |
| 6.                                                                                                                             | 11.245             | 108,129   | 12.562             | 163,043   | 13.749             | 77,962    | 15.126             | 94,606    | 22.594             | 103,635   | 25.773             | 79,668    |
| Average                                                                                                                        | 11.261             | 110757    | 12.589             | 166992    | 13.787             | 80164     | 15.151             | 97146     | 22.714             | 106189    | 25.933             | 82066     |
| <sup>1</sup> SD                                                                                                                | 0.066              | 2147      | 0.076              | 3183      | 0.084              | 1478      | 0.085              | 1519      | 0.131              | 1968      | 0.147              | 1594      |
| <sup>2</sup> RSD %                                                                                                             | 0.58               | 1.94      | 0.61               | 1.91      | 0.61               | 1.84      | 0.56               | 1.56      | 0.57               | 1.85      | 0.57               | 1.94      |

<sup>1</sup> Standard deviation

<sup>2</sup> Relative standard deviation, %

**Table S4.** Intermediate precision results for compounds **1h**, **1j**, **1i**, **1m**, **1g**, **1n** – 5 µg/ mL solution

| Precision results for compounds <b>1h</b> , <b>1j</b> , <b>1i</b> , <b>1m</b> , <b>1g</b> , <b>1n</b> – 5 µg/ mL solution |                    |                    |                    |                    |                    |                    |                    |                    |                    |                    |                    |                    |
|---------------------------------------------------------------------------------------------------------------------------|--------------------|--------------------|--------------------|--------------------|--------------------|--------------------|--------------------|--------------------|--------------------|--------------------|--------------------|--------------------|
| Sample No.                                                                                                                | Compound <b>1h</b> |                    | Compound <b>1j</b> |                    | Compound <b>1i</b> |                    | Compound <b>1m</b> |                    | Compound <b>1g</b> |                    | Compound <b>1n</b> |                    |
|                                                                                                                           | Ret. Time [min.]   | Peak Area [µV*sec] |
| 1.                                                                                                                        | 11.270             | 111,591            | 12.596             | 169,135            | 13.789             | 82,009             | 15.167             | 97,170             | 22.721             | 108,491            | 25.932             | 84,215             |
| 2.                                                                                                                        | 11.272             | 111,110            | 12.602             | 168,465            | 13.801             | 82,735             | 15.168             | 96,179             | 22.742             | 109,245            | 25.950             | 84,630             |
| 3.                                                                                                                        | 11.276             | 111,024            | 12.612             | 168,231            | 13.818             | 82,661             | 15.178             | 96,381             | 22.766             | 108,577            | 25.974             | 82,741             |
| 4.                                                                                                                        | 11.281             | 110,663            | 12.614             | 168,785            | 13.816             | 82,849             | 15.190             | 95,668             | 22.768             | 107,246            | 25.991             | 83,968             |
| 5.                                                                                                                        | 11.286             | 110,997            | 12.620             | 169,796            | 13.824             | 82,632             | 15.196             | 97,012             | 22.779             | 108,996            | 26.003             | 84,959             |
| 6.                                                                                                                        | 11.293             | 110,417            | 12.632             | 166,835            | 13.836             | 82,261             | 15.197             | 96,243             | 22.789             | 106,276            | 26.013             | 83,531             |
| 7.                                                                                                                        | 11.142             | 110,842            | 12.456             | 168,780            | 13.649             | 80,744             | 15.006             | 97,663             | 22.563             | 106,865            | 25.801             | 83,077             |
| 8.                                                                                                                        | 11.330             | 109,970            | 12.672             | 166,002            | 13.886             | 79,884             | 15.250             | 97,797             | 22.896             | 106,337            | 26.148             | 81,794             |
| 9.                                                                                                                        | 11.306             | 109,387            | 12.646             | 165,117            | 13.853             | 79,171             | 15.209             | 96,058             | 22.831             | 104,014            | 26.056             | 82,753             |
| 10.                                                                                                                       | 11.281             | 114,244            | 12.615             | 172,220            | 13.805             | 81,127             | 15.179             | 98,678             | 22.722             | 108,103            | 25.945             | 80,985             |
| 11.                                                                                                                       | 11.261             | 111,967            | 12.585             | 166,791            | 13.783             | 82,099             | 15.138             | 98,075             | 22.681             | 108,183            | 25.875             | 84,121             |
| 12.                                                                                                                       | 11.245             | 108,129            | 12.562             | 163,043            | 13.749             | 77,962             | 15.126             | 94,606             | 22.594             | 103,635            | 25.773             | 79,668             |
| Average                                                                                                                   | 11.270             | 110,862            | 12.601             | 167,767            | 13.801             | 81,345             | 15.167             | 96,794             | 22.738             | 107,164            | 25.955             | 83,037             |
| <sup>1</sup> SD                                                                                                           | 0.046              | 1476               | 0.054              | 2390               | 0.059              | 1600               | 0.060              | 1152               | 0.093              | 1842               | 0.104              | 1572               |
| <sup>2</sup> RSD %                                                                                                        | 0.40               | 1.33               | 0.43               | 1.42               | 0.43               | 1.97               | 0.40               | 1.19               | 0.41               | 1.72               | 0.40               | 1.89               |

<sup>1</sup> Standard deviation

<sup>2</sup> Relative standard deviation, %

## LOD

The limit of detection of an individual analytical method is the lowest quantity of an analyte that can be distinguished from a substance within a stated confidence limit.

The limit of detection was determined based on the calibration curve at low concentrations. Solutions of compounds **1h**, **1j**, **1i**, **1m**, **1g**, and **1n** were prepared and the calibration curve was traced. Limit of detection was estimated based on the following formula:

$$\text{LOD} = \frac{F \times \text{SD}}{b}, \text{ where:}$$

F – 3.3 in case of LOD;

SD – standard deviation;

b – slope of the calibration curve.

## LOQ

The limit of quantitation of an individual analytical method is the lowest quantity of an analyte that can be quantitated from a substance within a stated confidence limit.

The limit of quantitation was determined based on the calibration curve at low concentrations. Solutions of compounds **1h**, **1j**, **1i**, **1m**, **1g**, and **1n** were prepared and the calibration curve was traced. Limit of quantitation was estimated based on the following formula:

$$\text{LOQ} = \frac{F \times \text{SD}}{b}, \text{ where:}$$

F – 10.0 in case of LOQ;

SD – standard deviation;

b – slope of the calibration curve.

### Preparation of solutions:

In order to obtain the LOD and LOQ of the method for compounds **1h**, **1j**, **1i**, **1m**, **1g**, and **1n**, a calibration curve was created by preparing increasingly concentrated solutions from the *Stock Solution*.



### Procedure:

Stock solutions of 500  $\mu\text{g}/\text{mL}$  are prepared from each of the tested compounds:

*Stock solution 1h* (500  $\mu\text{g}/\text{mL}$ ): 5 mg compound **1h** were transferred into a 10 mL volumetric flask, 5 mL acetonitrile R were added, the flask was sonicated for 5 minutes, cooled to room temperature and diluted to volume with acetonitrile R.

*Stock solution 1j* (500  $\mu\text{g}/\text{mL}$ ): 5 mg compound **1j** were transferred into a 10 mL volumetric flask, 5 mL acetonitrile R were added, the flask was sonicated for 5 minutes, cooled to room temperature and diluted to volume with acetonitrile R.

*Stock solution 1i* (500  $\mu\text{g}/\text{mL}$ ): 5 mg compound **1i** were transferred into a 10 mL volumetric flask, 5 mL acetonitrile R were added, the flask was sonicated for 5 minutes, cooled to room temperature and diluted to volume with acetonitrile R.

*Stock solution 1m* (500  $\mu\text{g}/\text{mL}$ ): 5 mg compound **1m** were transferred into a 10 mL volumetric flask, 5 mL acetonitrile R were added, the flask was sonicated for 5 minutes, cooled to room temperature and diluted to volume with acetonitrile R.

*Stock solution 1g* (500  $\mu\text{g}/\text{mL}$ ): 5 mg compound **1g** were transferred into a 10 mL volumetric flask, 5 mL acetonitrile R were added, the flask was sonicated for 5 minutes, cooled to room temperature and diluted to volume with acetonitrile R.

*Stock solution 1n* (500  $\mu\text{g}/\text{mL}$ ): 5 mg compound **1n** were transferred into a 10 mL volumetric flask, 5 mL acetonitrile R were added, the flask was sonicated for 5 minutes, cooled to room temperature and diluted to volume with acetonitrile R.

*Cumulative stock solution* (4.0  $\mu\text{g}/\text{mL}$  1h, 4.0  $\mu\text{g}/\text{mL}$  1j, 4.0  $\mu\text{g}/\text{mL}$  1i, 4.0  $\mu\text{g}/\text{mL}$  1m, 4.0  $\mu\text{g}/\text{mL}$  1g, 4.0  $\mu\text{g}/\text{mL}$  1n): 0.2 mL of each *Stock Solution* were diluted to 25 mL with methanol R.

*LOD-LOQ Solution 1*, 1.2% (0.06  $\mu\text{g}/\text{mL}$  1h, 0.06  $\mu\text{g}/\text{mL}$  1j, 0.06  $\mu\text{g}/\text{mL}$  1i, 0.06  $\mu\text{g}/\text{mL}$  1m, 0.06  $\mu\text{g}/\text{mL}$  1g, 0.06  $\mu\text{g}/\text{mL}$  1n): 0.15 mL of the *Cumulative stock solution* were diluted to 10 mL with methanol R.

*LOD-LOQ Solution 2*, 1.6% (0.08  $\mu\text{g}/\text{mL}$  1h, 0.08  $\mu\text{g}/\text{mL}$  1j, 0.08  $\mu\text{g}/\text{mL}$  1i, 0.08  $\mu\text{g}/\text{mL}$  1m, 0.08  $\mu\text{g}/\text{mL}$  1g, 0.08  $\mu\text{g}/\text{mL}$  1n): 0.2 mL of the *Cumulative stock solution* were diluted to 10 mL with methanol R.

*LOD-LOQ Solution 3*, 2% (0.1  $\mu\text{g}/\text{mL}$  1h, 0.1  $\mu\text{g}/\text{mL}$  1j, 0.1  $\mu\text{g}/\text{mL}$  1i, 0.1  $\mu\text{g}/\text{mL}$  1m, 0.1  $\mu\text{g}/\text{mL}$  1g, 0.1  $\mu\text{g}/\text{mL}$  1n): 0.5 mL of each *Cumulative stock solution* were diluted to 20 mL with methanol R.

*LOD-LOQ Solution 4*, 4% (0.2  $\mu\text{g}/\text{mL}$  1h, 0.2  $\mu\text{g}/\text{mL}$  1j, 0.2  $\mu\text{g}/\text{mL}$  1i, 0.2  $\mu\text{g}/\text{mL}$  1m, 0.2  $\mu\text{g}/\text{mL}$  1g, 0.2

$\mu\text{g/mL}$  **1n**): 1.0 mL of each *Stock Solution* were diluted to 20 mL with methanol R.

*LOD-LOQ Solution 5, 10%* (0.5  $\mu\text{g/mL}$  **1h**, 0.5  $\mu\text{g/mL}$  **1j**, 0.5  $\mu\text{g/mL}$  **1i**, 0.5  $\mu\text{g/mL}$  **1m**, 0.5  $\mu\text{g/mL}$  **1g**, 0.5  $\mu\text{g/mL}$  **1n**): 0.1 mL of each *Stock Solution* were diluted to 100 mL with methanol R.

The following sequence was used: DQS<sub>1</sub>, DQS<sub>2</sub>, DQS<sub>3</sub>, DQS<sub>4</sub>, DQS<sub>5</sub>,

where:

DQS = Limit of detection/limit of quantitation solution.

### Results:

The obtained results for the LOD-LOQ related to compounds **1h**, **1j**, **1i**, **1m**, **1g**, **1n** are presented in **Table S5**.

The  $R^2$  correlation coefficient of each LOD-LOQ calibration curve is greater than 0.99 (**Figure S12**), in compliance with the acceptance criteria.

**Table S5.** LOD-LOQ results for compounds **1h**, **1j**, **1i**, **1m**, **1g**, and **1n**, expressed in  $\mu\text{g/ mL}$  and % (considering 100% a solution of 5  $\mu\text{g/ mL}$  of each tested compound)

| Compound  | STDEV  | SLOPE    | LOD               |       | LOQ               |       |
|-----------|--------|----------|-------------------|-------|-------------------|-------|
|           |        |          | $\mu\text{g/ mL}$ | %     | $\mu\text{g/ mL}$ | %     |
| <b>1h</b> | 181.72 | 23750.89 | 0.0252            | 0.504 | 0.0765            | 1.530 |
| <b>1j</b> | 183.68 | 26862.68 | 0.0205            | 0.410 | 0.0684            | 1.368 |
| <b>1i</b> | 118.33 | 19265.90 | 0.0184            | 0.368 | 0.0614            | 1.228 |
| <b>1m</b> | 139.32 | 18696.35 | 0.0224            | 0.448 | 0.0745            | 1.490 |
| <b>1g</b> | 127.23 | 16188.43 | 0.0236            | 0.472 | 0.0786            | 1.572 |
| <b>1n</b> | 110.25 | 13827.25 | 0.0239            | 0.478 | 0.0797            | 1.594 |

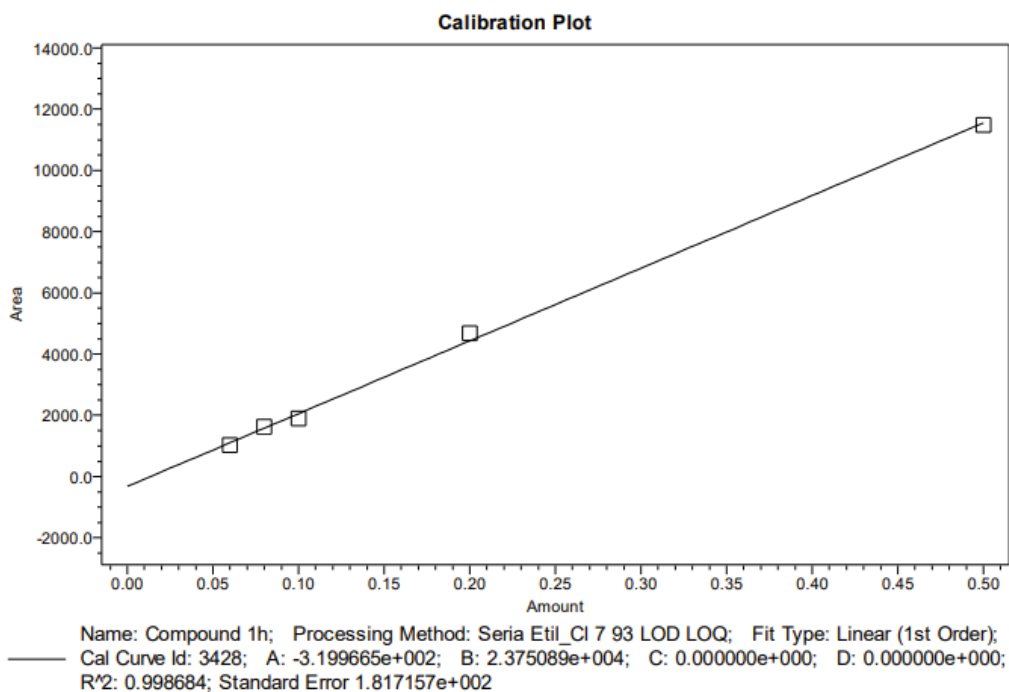

(a)

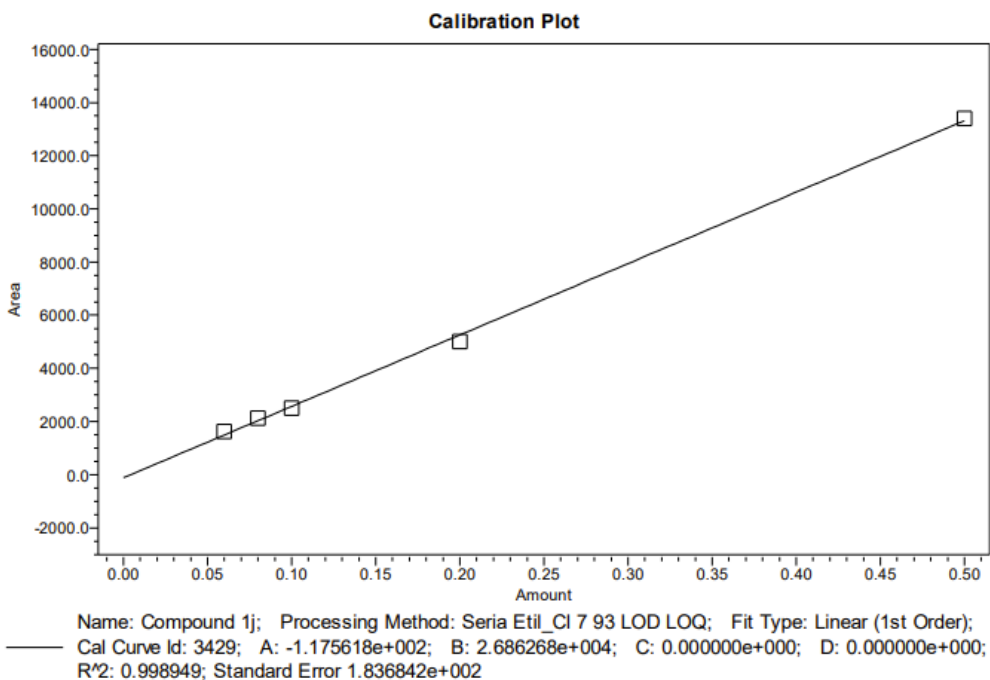

(b)

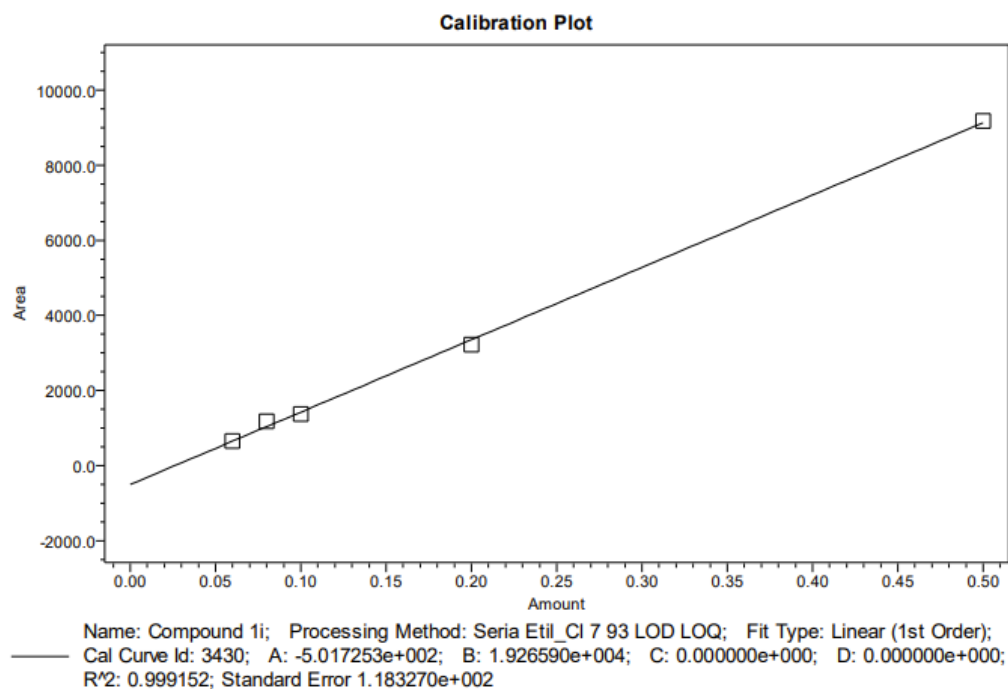

(c)

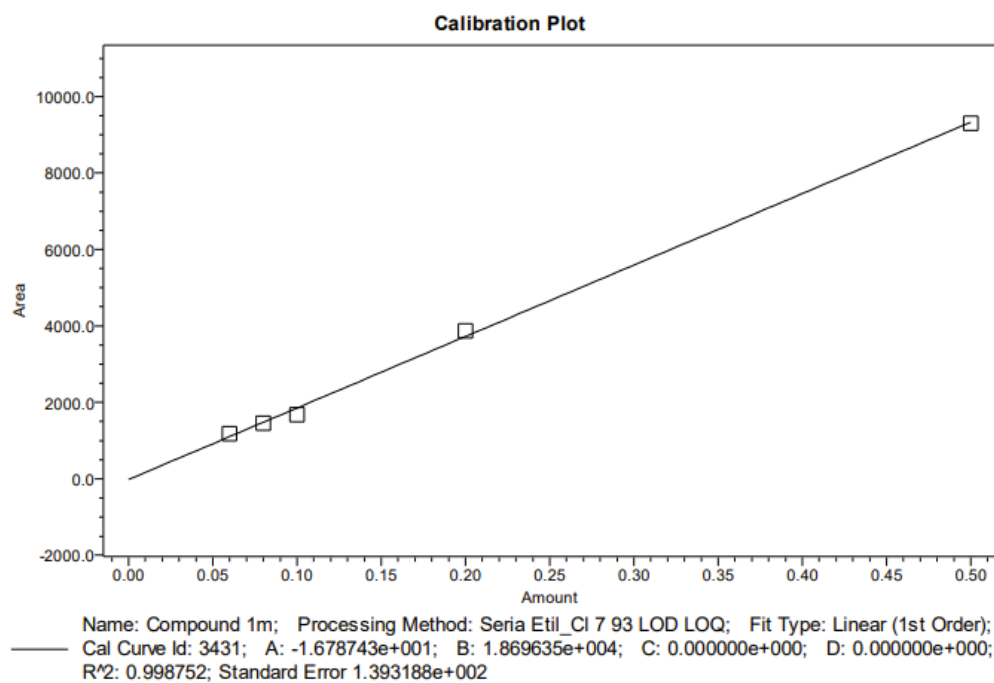

(d)

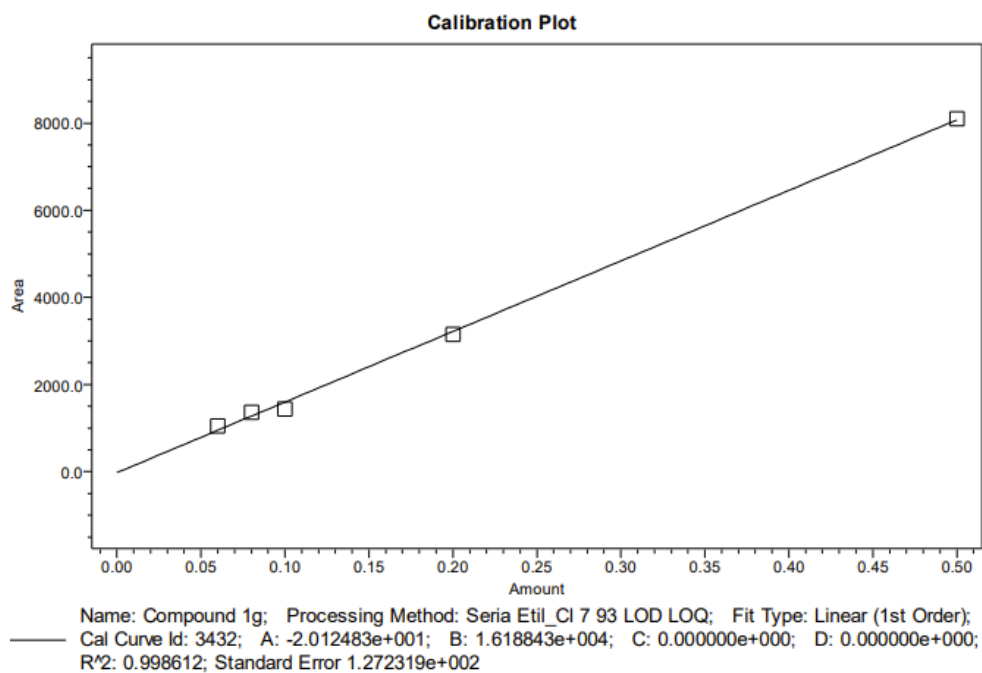

(e)

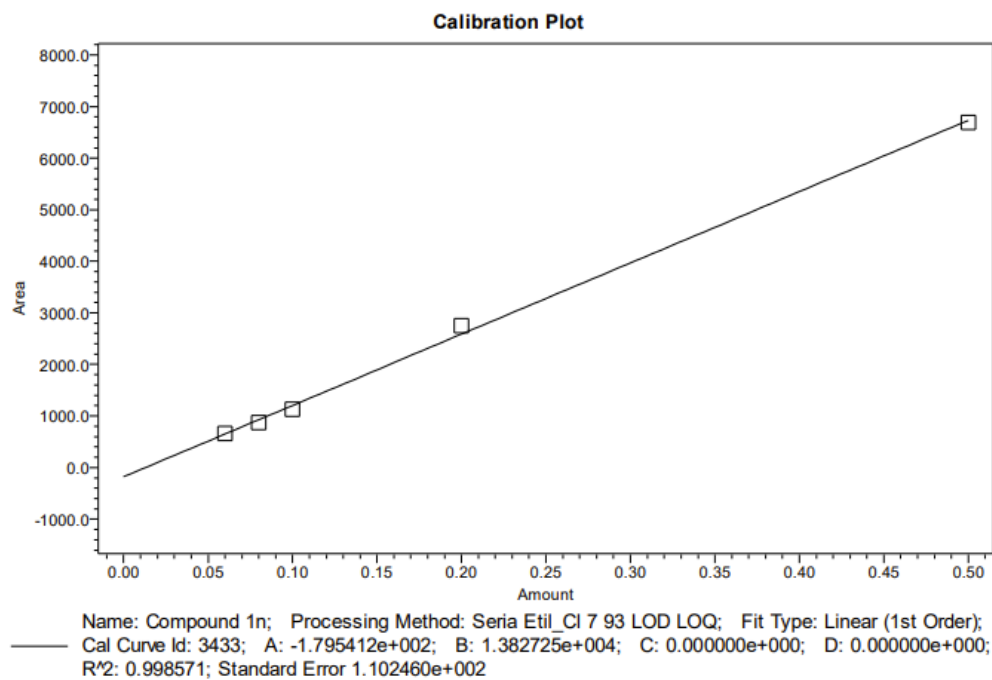

(f)

**Figure S12.** LOD-LOQ Calibration Curves for (a) **1h**, amount in  $\mu\text{g/mL}$ ; (b) **1j**, amount in  $\mu\text{g/mL}$ ; (c) **1i** amount in  $\mu\text{g/mL}$ ; (d) **1m**, amount in  $\mu\text{g/mL}$ ; (e) **1g**, amount in  $\mu\text{g/mL}$ ; (f) **1n**, amount in  $\mu\text{g/mL}$ .

## LINEARITY

The linearity of an analytical procedure represents its ability (within a given range) to obtain test results which are directly proportional to the concentration of analyte in the analyzed sample.

### Linearity range:

The range of an analytical procedure is the interval between the upper and lower concentration (amounts) of analyte in the sample (including these concentrations) for which it has been demonstrated that the analytical procedure has a suitable level of precision, accuracy and linearity.

The linearity of the method is demonstrated within the concentration range of the theoretical working concentration (LOQ – 6.0 µg/ mL compounds **1h**, **1j**, **1i**, **1m**, **1g**, and **1n**).

### Preparation of solutions:

In order to demonstrate the linearity of the method, a calibration curve was created by preparing increasingly concentrated solutions. The range of concentrations was LOQ – 6.0 µg/ mL compounds **1h**, **1j**, **1i**, **1m**, **1g**, and **1n**.

Stock solutions of 500 µg/ mL are prepared from each of the tested compounds:

*Stock solution 1h (500 µg/ mL):* 5 mg compound **1h** were transferred into a 10 mL volumetric flask, 5 mL acetonitrile R were added, the flask was sonicated for 5 minutes, cooled to room temperature and diluted to volume with acetonitrile R.

*Stock solution 1j (500 µg/ mL):* 5 mg compound **1j** were transferred into a 10 mL volumetric flask, 5 mL acetonitrile R were added, the flask was sonicated for 5 minutes, cooled to room temperature and diluted to volume with acetonitrile R.

*Stock solution 1i (500 µg/ mL):* 5 mg compound **1i** were transferred into a 10 mL volumetric flask, 5 mL acetonitrile R were added, the flask was sonicated for 5 minutes, cooled to room temperature and diluted to volume with acetonitrile R.

*Stock solution 1m (500 µg/ mL):* 5 mg compound **1m** were transferred into a 10 mL volumetric flask, 5 mL acetonitrile R were added, the flask was sonicated for 5 minutes, cooled to room temperature and diluted to volume with acetonitrile R.

*Stock solution 1g (500 µg/ mL):* 5 mg compound **1g** were transferred into a 10 mL volumetric flask, 5 mL acetonitrile R were added, the flask was sonicated for 5 minutes, cooled to room temperature and diluted to volume with acetonitrile R.

*Stock solution 1n (500 µg/ mL):* 5 mg compound **1n** were transferred into a 10 mL volumetric flask, 5



mL acetonitrile R were added, the flask was sonicated for 5 minutes, cooled to room temperature and diluted to volume with acetonitrile R.

*Linearity Solution 1, 1.2% (0.06 µg/mL 1h, 0.06 µg/mL 1j, 0.06 µg/mL 1i, 0.06 µg/mL 1m, 0.06 µg/mL 1g, 0.06 µg/mL 1n):* 0.2 mL of each *Stock Solution* were diluted to 25 mL with methanol R. 0.15 mL of the obtained solution were diluted to 10 mL with methanol R.

*Linearity Solution 2, 1.6% (0.08 µg/mL 1h, 0.08 µg/mL 1j, 0.08 µg/mL 1i, 0.08 µg/mL 1m, 0.08 µg/mL 1g, 0.08 µg/mL 1n):* 0.2 mL of each *Stock Solution* were diluted to 25 mL with methanol R. 0.2 mL of the obtained solution were diluted to 10 mL with methanol R.

*Linearity Solution 3, 2% (0.1 µg/mL 1h, 0.1 µg/mL 1j, 0.1 µg/mL 1i, 0.1 µg/mL 1m, 0.1 µg/mL 1g, 0.1 µg/mL 1n):* 0.2 mL of each *Stock Solution* were diluted to 25 mL with methanol R. 0.5 mL of the obtained solution were diluted to 20 mL with methanol R.

*Linearity Solution 4, 4% (0.2 µg/mL 1h, 0.2 µg/mL 1j, 0.2 µg/mL 1i, 0.2 µg/mL 1m, 0.2 µg/mL 1g, 0.2 µg/mL 1n):* 0.2 mL of each *Stock Solution* were diluted to 25 mL with methanol R. 1.0 mL of the obtained solution were diluted to 20 mL with methanol R.

*Linearity Solution 5, 10% (0.5 µg/mL 1h, 0.5 µg/mL 1j, 0.5 µg/mL 1i, 0.5 µg/mL 1m, 0.5 µg/mL 1g, 0.5 µg/mL 1n):* 0.1 mL of each *Stock Solution* were diluted to 100 mL with methanol R.

*Linearity Solution 5, 80% (4.0 µg/mL 1h, 4.0 µg/mL 1j, 4.0 µg/mL 1i, 4.0 µg/mL 1m, 4.0 µg/mL 1g, 4.0 µg/mL 1n):* 0.20 mL of each *Stock Solution* were diluted to 25 mL with methanol R.

*Linearity Solution 5, 100% (5.0 µg/mL 1h, 5.0 µg/mL 1j, 5.0 µg/mL 1i, 5.0 µg/mL 1m, 5.0 µg/mL 1g, 5.0 µg/mL 1n):* 0.25 mL of each *Stock Solution* were diluted to 25 mL with methanol R.

*Linearity Solution 5, 120% (6.0 µg/mL 1h, 6.0 µg/mL 1j, 6.0 µg/mL 1i, 6.0 µg/mL 1m, 6.0 µg/mL 1g, 6.0 µg/mL 1n):* 0.30 mL of each *Stock Solution* were diluted to 25 mL with methanol R.

The following sequence was used:  $SL_1$ ,  $SL_2$ ,  $SL_3$ ,  $SL_4$ ,  $SL_5$ ,  $SL_6$ ,  $SL_7$ ,  $SL_8$ , where:

SL = linearity solution.

## Results:

The linearity results are presented in the **Table S6**.

The  $R^2$  correlation coefficient of each linearity plot is greater than 0.99 (**Figure S13**), in compliance with the acceptance criteria.

**Table S6.** Linearity results for compounds **1h**, **1j**, **1i**, **1m**, **1g**, and **1n**

| Level<br>[%] | Concentration<br>[ $\mu\text{g}/\text{mL}$ ] | Peak areas [ $\mu\text{V}\cdot\text{sec}$ ] of the evaluated compounds |           |           |           |           |           |
|--------------|----------------------------------------------|------------------------------------------------------------------------|-----------|-----------|-----------|-----------|-----------|
|              |                                              | <b>1h</b>                                                              | <b>1j</b> | <b>1i</b> | <b>1m</b> | <b>1g</b> | <b>1n</b> |
| <b>1.2</b>   | 0.06                                         | 1034                                                                   | 1630      | 507       | 1178      | 1053      | 658       |
| <b>1.6</b>   | 0.08                                         | 1627                                                                   | 2133      | 1180      | 1459      | 1365      | 872       |
| <b>2.0</b>   | 0.10                                         | 1897                                                                   | 2500      | 1374      | 1682      | 1438      | 1130      |
| <b>4.0</b>   | 0.20                                         | 4680                                                                   | 5007      | 3217      | 3871      | 3157      | 2753      |
| <b>10.0</b>  | 0.50                                         | 11,488                                                                 | 13,394    | 9171      | 9300      | 8106      | 6692      |
| <b>80.0</b>  | 4.00                                         | 894,36                                                                 | 135,007   | 69,752    | 78,851    | 90,083    | 73,829    |
| <b>100.0</b> | 5.00                                         | 110,698                                                                | 166,926   | 85,573    | 97,456    | 112,175   | 90,045    |
| <b>120.0</b> | 6.00                                         | 133,370                                                                | 200,966   | 102,149   | 118,926   | 133,117   | 10,8604   |

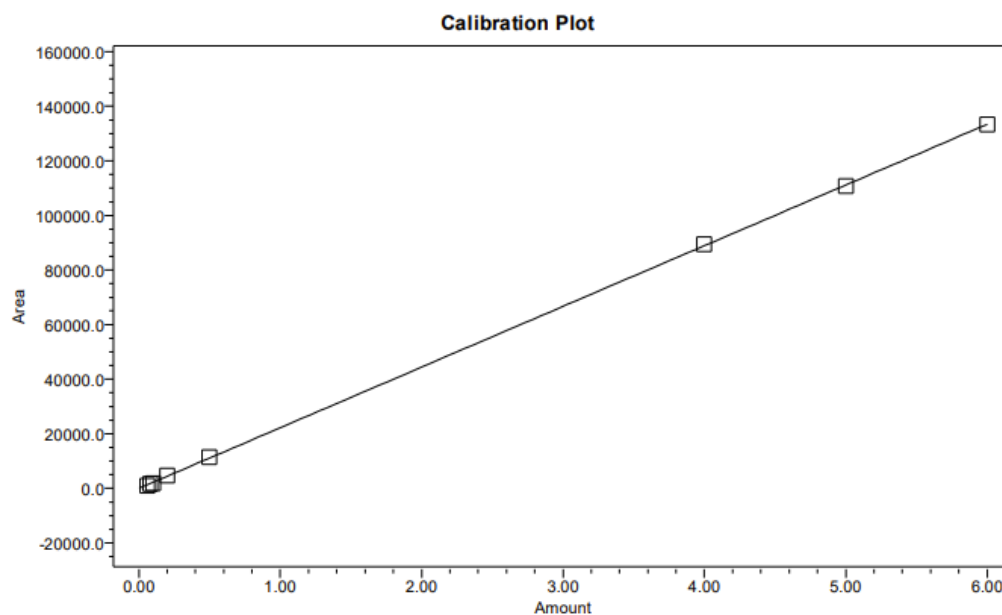

(a)



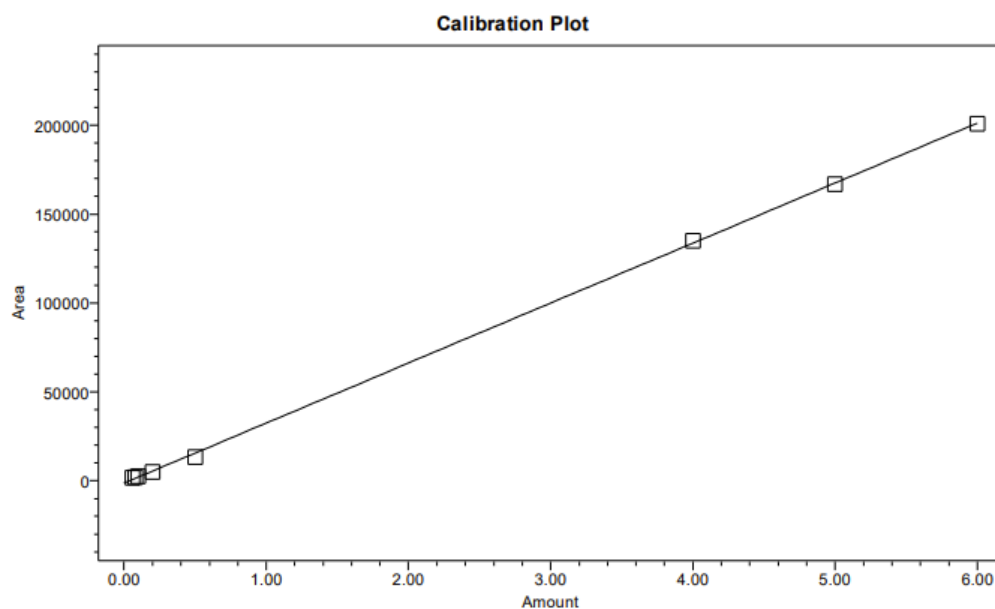

(b)

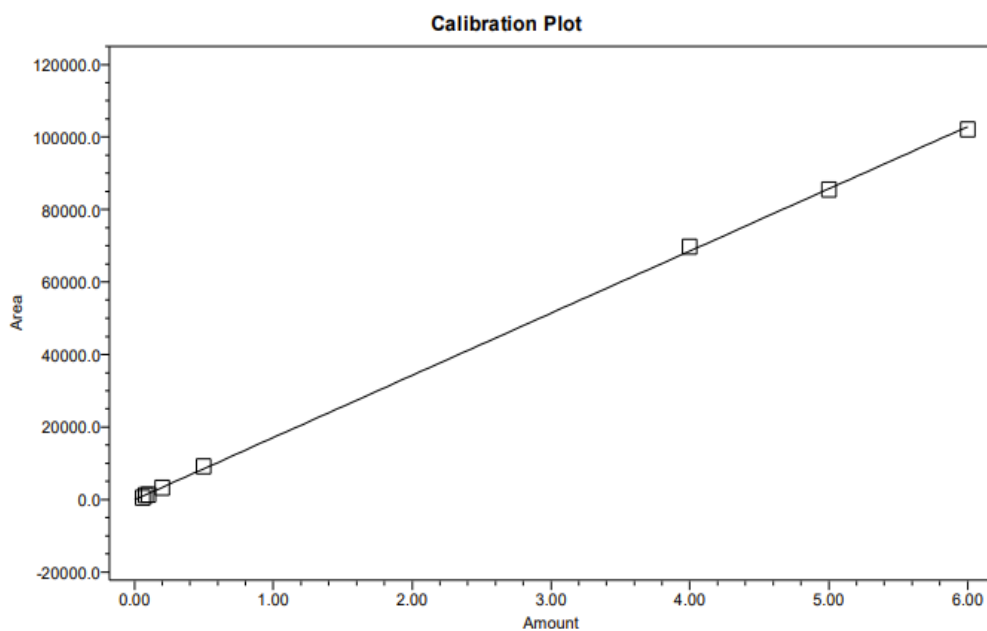

(c)

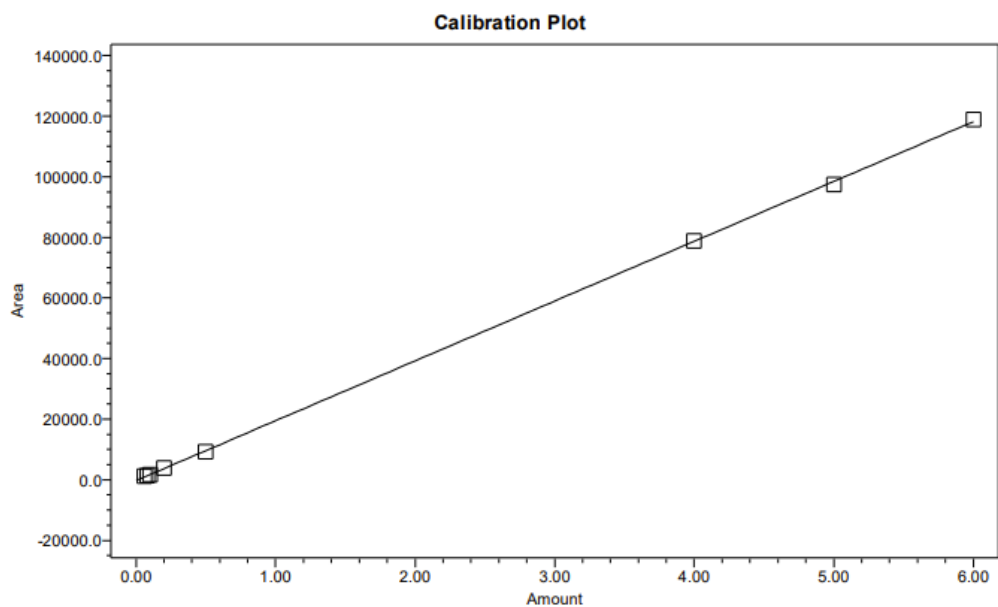

(d)

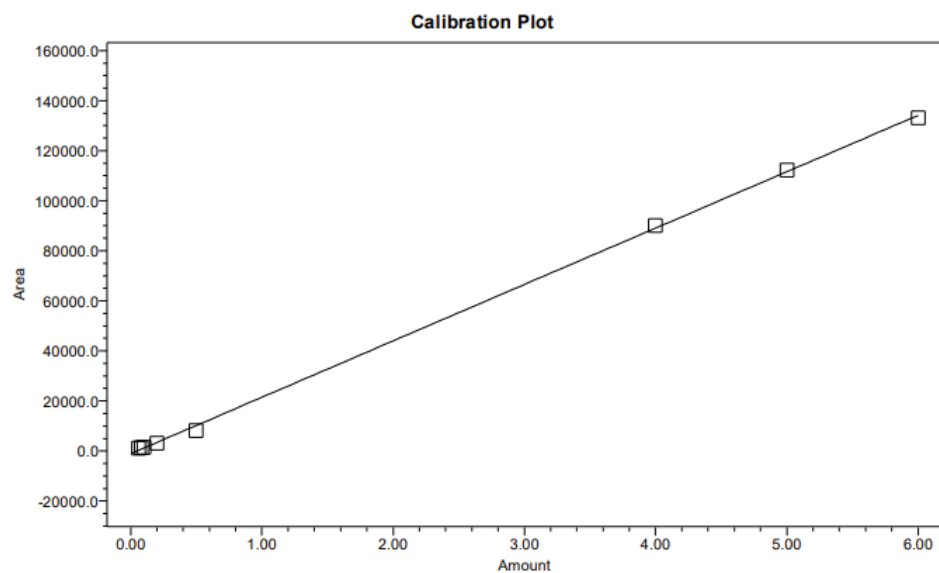

(e)

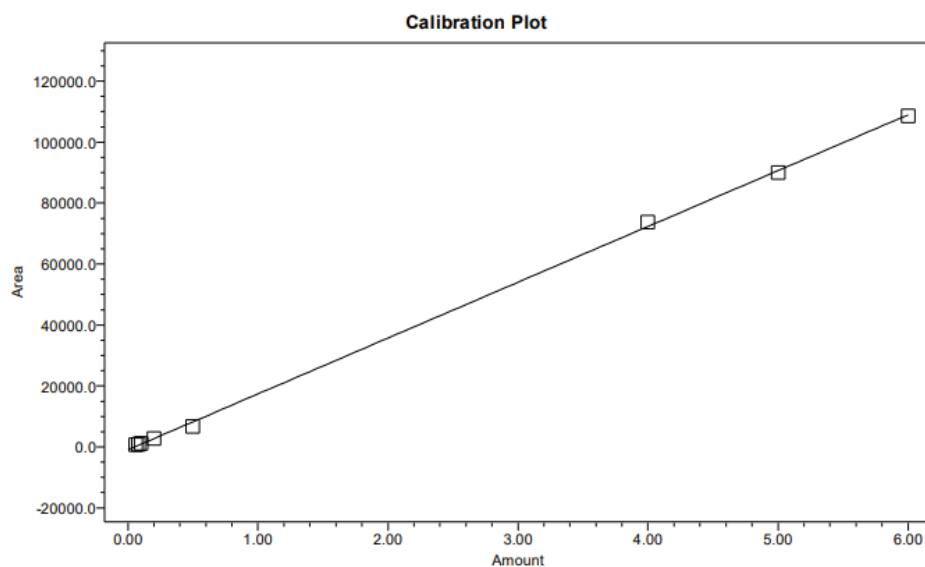

(f)

**Figure S13.** Linearity Plots extracted from Empower 3 software, for **(a) 1h** ( $R^2 = 0.9999$ ;  $B = 22233.20$ ); **(b) 1j** ( $R^2 = 0.9998$ ;  $B = 1191.98$ ); **(c) 1i** ( $R^2 = 0.9998$ ;  $B = 673.52$ ); **(d) 1m** ( $R^2 = 0.9999$ ;  $B = 541.35$ ); **(e) 1g** ( $R^2 = 0.9997$ ;  $B = 1147.85$ ); **(f) 1n** ( $R^2 = 0.9996$ ;  $B = 957.13$ ).

## ACCURACY

The accuracy of an analytical procedure expresses the closeness of agreement between the value which is accepted either as a conventional true value or an accepted reference value and the value found.

In order to demonstrate the accuracy of the method, three concentration levels (low, medium and high concentration) were prepared and analyzed.

### Preparation of solutions:

Stock solutions of 500  $\mu\text{g}/\text{mL}$  are prepared from each of the tested compounds:

*Stock solution 1h* (500  $\mu\text{g}/\text{mL}$ ): 5.00 mg compound **1h** were transferred into a 10 mL volumetric flask, 5 mL acetonitrile R were added, the flask was sonicated for 5 minutes, cooled to room temperature and diluted to volume with acetonitrile R.

*Stock solution 1j* (502  $\mu\text{g}/\text{mL}$ ): 5.02 mg compound **1j** were transferred into a 10 mL volumetric flask, 5 mL acetonitrile R were added, the flask was sonicated for 5 minutes, cooled to room temperature and diluted to volume with acetonitrile R.

*Stock solution 1i* (505  $\mu\text{g}/\text{mL}$ ): 5.05 mg compound **1i** were transferred into a 10 mL volumetric flask, 5 mL acetonitrile R were added, the flask was sonicated for 5 minutes, cooled to room temperature and diluted to volume with acetonitrile R.

*Stock solution 1m* (498  $\mu\text{g}/\text{mL}$ ): 4.98 mg compound **1m** were transferred into a 10 mL volumetric flask, 5 mL acetonitrile R were added, the flask was sonicated for 5 minutes, cooled to room temperature and diluted to volume with acetonitrile R.

*Stock solution 1g* (508  $\mu\text{g}/\text{mL}$ ): 5.08 mg compound **1g** were transferred into a 10 mL volumetric flask, 5 mL acetonitrile R were added, the flask was sonicated for 5 minutes, cooled to room temperature and diluted to volume with acetonitrile R.

*Stock solution 1n* (525  $\mu\text{g}/\text{mL}$ ): 5.25 mg compound **1n** were transferred into a 10 mL volumetric flask, 5 mL acetonitrile R were added, the flask was sonicated for 5 minutes, cooled to room temperature and diluted to volume with acetonitrile R.

*Standard solution* (5  $\mu\text{g}/\text{mL}$  compound **1h**, 5  $\mu\text{g}/\text{mL}$  compound **1j**, 5  $\mu\text{g}/\text{mL}$  compound **1i**, 5  $\mu\text{g}/\text{mL}$  compound **1m**, 5  $\mu\text{g}/\text{mL}$  compound **1g**, 5  $\mu\text{g}/\text{mL}$  compound **1n**): 0.25 mL of each stock solution were diluted to 25 mL with methanol R.

***Accuracy – 80%:***

*Stock solution 1h* (502  $\mu\text{g}/\text{mL}$ ): 5.02 mg compound **1h** were transferred into a 10 mL volumetric flask, 5 mL acetonitrile R were added, the flask was sonicated for 5 minutes, cooled to room temperature and diluted to volume with acetonitrile R.

*Stock solution 1j* (502  $\mu\text{g}/\text{mL}$ ): 5.02 mg compound **1j** were transferred into a 10 mL volumetric flask, 5 mL acetonitrile R were added, the flask was sonicated for 5 minutes, cooled to room temperature and diluted to volume with acetonitrile R.

*Stock solution 1i* (501  $\mu\text{g}/\text{mL}$ ): 5.01 mg compound **1i** were transferred into a 10 mL volumetric flask, 5 mL acetonitrile R were added, the flask was sonicated for 5 minutes, cooled to room temperature and diluted to volume with acetonitrile R.

*Stock solution 1m* (500  $\mu\text{g}/\text{mL}$ ): 5.00 mg compound **1m** were transferred into a 10 mL volumetric flask, 5 mL acetonitrile R were added, the flask was sonicated for 5 minutes, cooled to room temperature and diluted to volume with acetonitrile R.

*Stock solution 1g* (503  $\mu\text{g}/\text{mL}$ ): 5.03 mg compound **1g** were transferred into a 10 mL volumetric flask, 5 mL acetonitrile R were added, the flask was sonicated for 5 minutes, cooled to room temperature and diluted to volume with acetonitrile R.

*Stock solution 1n* (514  $\mu\text{g}/\text{mL}$ ): 5.14 mg compound **1n** were transferred into a 10 mL volumetric flask, 5 mL acetonitrile R were added, the flask was sonicated for 5 minutes, cooled to room temperature and diluted to volume with acetonitrile R.

*Test solution accuracy 1 – 80%* (4  $\mu\text{g}/\text{mL}$  compound **1h**, 4  $\mu\text{g}/\text{mL}$  compound **1j**, 4  $\mu\text{g}/\text{mL}$  compound **1i**, 4  $\mu\text{g}/\text{mL}$  compound **1m**, 4  $\mu\text{g}/\text{mL}$  compound **1g**, 4  $\mu\text{g}/\text{mL}$  compound **1n**): 0.20 mL of each stock solution were diluted to 25 mL with methanol R.

*Test solution accuracy 1 – 80%* was prepared six times.

***Accuracy – 100%:***

*Stock solution 1h* (500  $\mu\text{g}/\text{mL}$ ): 5.00 mg compound **1h** were transferred into a 10 mL volumetric flask, 5 mL acetonitrile R were added, the flask was sonicated for 5 minutes, cooled to room temperature and diluted to volume with acetonitrile R.

*Stock solution 1j* (500  $\mu\text{g}/\text{mL}$ ): 5.00 mg compound **1j** were transferred into a 10 mL volumetric flask, 5 mL acetonitrile R were added, the flask was sonicated for 5 minutes, cooled to room temperature and diluted to volume with acetonitrile R.

*Stock solution 1i* (495  $\mu\text{g}/\text{mL}$ ): 4.95 mg compound **1i** were transferred into a 10 mL volumetric flask, 5 mL acetonitrile R were added, the flask was sonicated for 5 minutes, cooled to room temperature and diluted to volume with acetonitrile R.

*Stock solution 1m* (501  $\mu\text{g}/\text{mL}$ ): 5.01 mg compound **1m** were transferred into a 10 mL volumetric flask, 5 mL acetonitrile R were added, the flask was sonicated for 5 minutes, cooled to room temperature and diluted to volume with acetonitrile R.

*Stock solution 1g* (498  $\mu\text{g}/\text{mL}$ ): 4.98 mg compound **1g** were transferred into a 10 mL volumetric flask, 5 mL acetonitrile R were added, the flask was sonicated for 5 minutes, cooled to room temperature and diluted to volume with acetonitrile R.

*Stock solution 1n* (494  $\mu\text{g}/\text{mL}$ ): 4.94 mg compound **1n** were transferred into a 10 mL volumetric flask, 5 mL acetonitrile R were added, the flask was sonicated for 5 minutes, cooled to room temperature and diluted to volume with acetonitrile R.

*Test solution accuracy 2 – 100%: (5  $\mu\text{g}/\text{mL}$  compound 1h, 5  $\mu\text{g}/\text{mL}$  compound 1j, 5  $\mu\text{g}/\text{mL}$  compound 1i, 5  $\mu\text{g}/\text{mL}$  compound 1m, 5  $\mu\text{g}/\text{mL}$  compound 1g, 5  $\mu\text{g}/\text{mL}$  compound 1n):* 0.25 mL of each stock solution were diluted to 25 mL with methanol R.

*Test solution accuracy 2 – 100%* was prepared six times.

***Accuracy – 120%:***

*Stock solution 1h* (501  $\mu\text{g}/\text{mL}$ ): 5.01 mg compound **1h** were transferred into a 10 mL volumetric flask, 5 mL acetonitrile R were added, the flask was sonicated for 5 minutes, cooled to room temperature and diluted to volume with acetonitrile R.

*Stock solution 1j* (502  $\mu\text{g}/\text{mL}$ ): 5.02 mg compound **1j** were transferred into a 10 mL volumetric flask, 5 mL acetonitrile R were added, the flask was sonicated for 5 minutes, cooled to room temperature and diluted to volume with acetonitrile R.

*Stock solution 1i* (498  $\mu\text{g}/\text{mL}$ ): 4.98 mg compound **1i** were transferred into a 10 mL volumetric flask, 5 mL acetonitrile R were added, the flask was sonicated for 5 minutes, cooled to room temperature and diluted to volume with acetonitrile R.

*Stock solution 1m* (511  $\mu\text{g}/\text{mL}$ ): 5.11 mg compound **1m** were transferred into a 10 mL volumetric flask, 5 mL acetonitrile R were added, the flask was sonicated for 5 minutes, cooled to room temperature and diluted to volume with acetonitrile R.

*Stock solution 1g* (502  $\mu\text{g}/\text{mL}$ ): 5.02 mg compound **1g** were transferred into a 10 mL volumetric flask, 5 mL acetonitrile R were added, the flask was sonicated for 5 minutes, cooled to room temperature and diluted to volume with acetonitrile R.

*Stock solution 1n* (508  $\mu\text{g}/\text{mL}$ ): 5.08 mg compound **1n** were transferred into a 10 mL volumetric flask, 5 mL acetonitrile R were added, the flask was sonicated for 5 minutes, cooled to room temperature and diluted to volume with acetonitrile R.

*Test solution accuracy 3 – 120%* (6  $\mu\text{g}/\text{mL}$  compound **1h**, 6  $\mu\text{g}/\text{mL}$  compound **1j**, 6  $\mu\text{g}/\text{mL}$  compound **1i**, 6  $\mu\text{g}/\text{mL}$  compound **1m**, 6  $\mu\text{g}/\text{mL}$  compound **1g**, 6  $\mu\text{g}/\text{mL}$  compound **1n**): 0.30 mL of each stock solution were diluted to 25 mL with methanol R.

*Test solution accuracy 3 – 120%* was prepared six times.

### Procedure:

The following sequence was used: SS, SS, SS, SA<sub>1</sub>, SA<sub>1</sub>, SA<sub>1</sub>, SA<sub>1</sub>, SA<sub>1</sub>, SA<sub>1</sub>, SA<sub>2</sub>, SA<sub>2</sub>, SA<sub>2</sub>, SA<sub>2</sub>, SA<sub>2</sub>, SA<sub>2</sub>, SA<sub>3</sub>, SA<sub>3</sub>, SA<sub>3</sub>, SA<sub>3</sub>, SA<sub>3</sub>, SA<sub>3</sub>,

where: - SS – standard solution;

- SA – test solution;

### Data calculation:

$$\text{Absolute recovery (\%)} = \frac{\text{Recovered concentration}}{\text{Theoretical concentration}} \times 100.$$

$$\text{Theoretical concentration (80\%), } \mu\text{g/ mL} = \frac{S_m}{10} \times \frac{0.2}{25} \times 1000 = S_m \times 0.0008 \times 1000 = S_m \times 0.8,$$

$$\text{Theoretical concentration (100\%), } \mu\text{g/ mL} = \frac{S_m}{10} \times \frac{0.25}{25} \times 1000 = S_m \times 0.001 \times 1000 = S_m \times 1,$$

$$\text{Theoretical concentration (120\%), } \mu\text{g/ mL} = \frac{S_m}{10} \times \frac{0.3}{25} \times 1000 = S_m \times 0.0012 \times 1000 = S_m \times 1.2,$$

where,

S<sub>m</sub> = sample mass, mg;

0.0008, 0.001, 0.0012 = dilution factors;

1000 = conversion from mg to µg.

$$\text{Recovered concentration, } \mu\text{g/ mL} = \frac{A_P}{A_S} \times Ref_m \times \frac{0.25}{10} \times \frac{1000}{25} = \frac{A_P}{A_S} \times Ref_m \times 0.001 \times 1000,$$

where,

Ref<sub>m</sub> = reference mass, mg;

A<sub>P</sub> = Area of the peak due to each evaluated compound, in the chromatogram obtained with sample solution,

A<sub>S</sub> = Average area of the peak due to each evaluated compound in the chromatogram obtained with standard solution,

0.001 = dilution factor;

1000 = conversion from mg to µg.



## Results:

The experimental results are presented in the **Tables S7 – S12**.

**Table S7.** Accuracy levels – real (theoretical) and determined concentrations of compound **1h** and mean percent recovery (%) of six injections of each accuracy concentration (80%, 100%, and 120% analytical concentrations)

| Sample No.                             | Compound 1h concentration |                        |                 |                   |                        |                  |                   |                        |                  |
|----------------------------------------|---------------------------|------------------------|-----------------|-------------------|------------------------|------------------|-------------------|------------------------|------------------|
|                                        | 4 µg/ mL solution         |                        |                 | 5 µg/ mL solution |                        |                  | 6 µg/ mL solution |                        |                  |
|                                        | Real<br>[µg/ mL]          | Determined<br>[µg/ mL] | Recovery<br>[%] | Real<br>[µg/ mL]  | Determined<br>[µg/ mL] | Recovery,<br>[%] | Real<br>[µg/ mL]  | Determined<br>[µg/ mL] | Recovery,<br>[%] |
| 1.                                     | 4.0160                    | 3.9941                 | 99.45           | 5.0000            | 5.0308                 | 100.62           | 6.0120            | 5.9875                 | 99.59            |
| 2.                                     | 4.0160                    | 4.0314                 | 100.38          | 5.0000            | 5.0091                 | 100.18           | 6.0120            | 6.0257                 | 100.23           |
| 3.                                     | 4.0160                    | 3.9790                 | 99.08           | 5.0000            | 5.0052                 | 100.10           | 6.0120            | 6.0517                 | 100.66           |
| 4.                                     | 4.0160                    | 3.9763                 | 99.01           | 5.0000            | 4.9889                 | 99.78            | 6.0120            | 6.0198                 | 100.13           |
| 5.                                     | 4.0160                    | 4.0117                 | 99.89           | 5.0000            | 5.0040                 | 100.08           | 6.0120            | 6.0648                 | 100.88           |
| 6.                                     | 4.0160                    | 3.9536                 | 98.45           | 5.0000            | 4.9778                 | 99.56            | 6.0120            | 6.0027                 | 99.84            |
| Average:                               |                           |                        | 99.88           |                   |                        |                  |                   |                        |                  |
| Standard Deviation:                    |                           |                        | 0.62            |                   |                        |                  |                   |                        |                  |
| Relative standard deviation (RSD%):    |                           |                        | 0.62            |                   |                        |                  |                   |                        |                  |
| Confidence interval (Probability 95%): |                           |                        | 99.60 – 100.17  |                   |                        |                  |                   |                        |                  |

**Table S8.** Accuracy levels – real (theoretical) and determined concentrations of compound **1j** and mean percent recovery (%) of six injections of each accuracy concentration (80%, 100%, and 120% analytical concentrations)

| Sample No.                             | Compound 1j concentration |                        |                 |                   |                        |                  |                   |                        |                  |
|----------------------------------------|---------------------------|------------------------|-----------------|-------------------|------------------------|------------------|-------------------|------------------------|------------------|
|                                        | 4 µg/ mL solution         |                        |                 | 5 µg/ mL solution |                        |                  | 6 µg/ mL solution |                        |                  |
|                                        | Real<br>[µg/ mL]          | Determined<br>[µg/ mL] | Recovery<br>[%] | Real<br>[µg/ mL]  | Determined<br>[µg/ mL] | Recovery,<br>[%] | Real<br>[µg/ mL]  | Determined<br>[µg/ mL] | Recovery,<br>[%] |
| 1.                                     | 4.0160                    | 4.0301                 | 100.35          | 5.0000            | 5.0571                 | 101.14           | 6.0240            | 6.0375                 | 100.22           |
| 2.                                     | 4.0160                    | 4.0712                 | 101.37          | 5.0000            | 5.0371                 | 100.74           | 6.0240            | 6.0667                 | 100.71           |
| 3.                                     | 4.0160                    | 4.0537                 | 100.94          | 5.0000            | 5.0301                 | 100.60           | 6.0240            | 6.0223                 | 99.97            |
| 4.                                     | 4.0160                    | 4.0186                 | 100.06          | 5.0000            | 5.0466                 | 100.93           | 6.0240            | 6.0419                 | 100.30           |
| 5.                                     | 4.0160                    | 4.0491                 | 100.82          | 5.0000            | 5.0769                 | 101.54           | 6.0240            | 6.0723                 | 100.80           |
| 6.                                     | 4.0160                    | 3.9742                 | 98.96           | 5.0000            | 4.9883                 | 99.77            | 6.0240            | 6.0228                 | 99.98            |
| Average:                               |                           |                        | 100.51          |                   |                        |                  |                   |                        |                  |
| Standard Deviation:                    |                           |                        | 0.63            |                   |                        |                  |                   |                        |                  |
| Relative standard deviation (RSD%):    |                           |                        | 0.63            |                   |                        |                  |                   |                        |                  |
| Confidence interval (Probability 95%): |                           |                        | 100.22 – 100.81 |                   |                        |                  |                   |                        |                  |

**Table S9.** Accuracy levels – real (theoretical) and determined concentrations of compound **1i** and mean percent recovery (%) of six injections of each accuracy concentration (80%, 100%, and 120% analytical concentrations)

| Sample No.                             | Compound <b>1i</b> concentration |                        |                 |                   |                        |                  |                   |                        |                  |
|----------------------------------------|----------------------------------|------------------------|-----------------|-------------------|------------------------|------------------|-------------------|------------------------|------------------|
|                                        | 4 µg/ mL solution                |                        |                 | 5 µg/ mL solution |                        |                  | 6 µg/ mL solution |                        |                  |
|                                        | Real<br>[µg/ mL]                 | Determined<br>[µg/ mL] | Recovery<br>[%] | Real<br>[µg/ mL]  | Determined<br>[µg/ mL] | Recovery,<br>[%] | Real<br>[µg/ mL]  | Determined<br>[µg/ mL] | Recovery,<br>[%] |
| 1.                                     | 4.0080                           | 3.9700                 | 99.05           | 4.9500            | 4.8641                 | 98.26            | 5.9760            | 6.0261                 | 100.84           |
| 2.                                     | 4.0080                           | 4.0130                 | 100.13          | 4.9500            | 4.9072                 | 99.13            | 5.9760            | 6.0114                 | 100.59           |
| 3.                                     | 4.0080                           | 3.9996                 | 99.79           | 4.9500            | 4.9028                 | 99.05            | 5.9760            | 5.9827                 | 100.11           |
| 4.                                     | 4.0080                           | 3.9988                 | 99.77           | 4.9500            | 4.9139                 | 99.27            | 5.9760            | 6.0559                 | 101.34           |
| 5.                                     | 4.0080                           | 4.0086                 | 100.01          | 4.9500            | 4.9011                 | 99.01            | 5.9760            | 6.0050                 | 100.48           |
| 6.                                     | 4.0080                           | 3.8852                 | 96.94           | 4.9500            | 4.8791                 | 98.57            | 5.9760            | 6.0126                 | 100.61           |
| Average:                               |                                  |                        | 99.61           |                   |                        |                  |                   |                        |                  |
| Standard Deviation:                    |                                  |                        | 1.07            |                   |                        |                  |                   |                        |                  |
| Relative standard deviation (RSD%):    |                                  |                        | 1.07            |                   |                        |                  |                   |                        |                  |
| Confidence interval (Probability 95%): |                                  |                        | 99.12 – 100.10  |                   |                        |                  |                   |                        |                  |

**Table S10.** Accuracy levels – real (theoretical) and determined concentrations of compound **1m** and mean percent recovery (%) of six injections of each accuracy concentration (80%, 100%, and 120% analytical concentrations)

| Sample No.                             | Compound <b>1m</b> concentration |                        |                 |                   |                        |                  |                   |                        |                  |
|----------------------------------------|----------------------------------|------------------------|-----------------|-------------------|------------------------|------------------|-------------------|------------------------|------------------|
|                                        | 4 µg/ mL solution                |                        |                 | 5 µg/ mL solution |                        |                  | 6 µg/ mL solution |                        |                  |
|                                        | Real<br>[µg/ mL]                 | Determined<br>[µg/ mL] | Recovery<br>[%] | Real<br>[µg/ mL]  | Determined<br>[µg/ mL] | Recovery,<br>[%] | Real<br>[µg/ mL]  | Determined<br>[µg/ mL] | Recovery,<br>[%] |
| 1.                                     | 4.0000                           | 4.0299                 | 100.75          | 5.0100            | 5.0287                 | 100.37           | 6.1320            | 6.0211                 | 98.19            |
| 2.                                     | 4.0000                           | 4.0621                 | 101.55          | 5.0100            | 4.9774                 | 99.35            | 6.1320            | 6.1496                 | 100.29           |
| 3.                                     | 4.0000                           | 4.0122                 | 100.30          | 5.0100            | 4.9878                 | 99.56            | 6.1320            | 6.0550                 | 98.74            |
| 4.                                     | 4.0000                           | 4.0183                 | 100.46          | 5.0100            | 4.9509                 | 98.82            | 6.1320            | 6.1599                 | 100.46           |
| 5.                                     | 4.0000                           | 4.0091                 | 100.23          | 5.0100            | 5.0205                 | 100.21           | 6.1320            | 6.1337                 | 100.03           |
| 6.                                     | 4.0000                           | 3.9423                 | 98.56           | 5.0100            | 4.9807                 | 99.41            | 6.1320            | 6.0462                 | 98.60            |
| Average:                               |                                  |                        | 99.77           |                   |                        |                  |                   |                        |                  |
| Standard Deviation:                    |                                  |                        | 0.91            |                   |                        |                  |                   |                        |                  |
| Relative standard deviation (RSD%):    |                                  |                        | 0.91            |                   |                        |                  |                   |                        |                  |
| Confidence interval (Probability 95%): |                                  |                        | 99.35 – 100.19  |                   |                        |                  |                   |                        |                  |

**Table S11.** Accuracy levels – real (theoretical) and determined concentrations of compound **1g** and mean percent recovery (%) of six injections of each accuracy concentration (80%, 100%, and 120% analytical concentrations)

| Sample No.                             | Compound <b>1g</b> concentration |                        |                 |                   |                        |                  |                   |                        |                  |
|----------------------------------------|----------------------------------|------------------------|-----------------|-------------------|------------------------|------------------|-------------------|------------------------|------------------|
|                                        | 4 µg/ mL solution                |                        |                 | 5 µg/ mL solution |                        |                  | 6 µg/ mL solution |                        |                  |
|                                        | Real<br>[µg/ mL]                 | Determined<br>[µg/ mL] | Recovery<br>[%] | Real<br>[µg/ mL]  | Determined<br>[µg/ mL] | Recovery,<br>[%] | Real<br>[µg/ mL]  | Determined<br>[µg/ mL] | Recovery,<br>[%] |
| 1.                                     | 4.0240                           | 4.0729                 | 101.21          | 4.9800            | 5.0496                 | 101.40           | 6.0240            | 6.0501                 | 100.43           |
| 2.                                     | 4.0240                           | 4.1037                 | 101.98          | 4.9800            | 5.0847                 | 102.10           | 6.0240            | 6.1279                 | 101.72           |
| 3.                                     | 4.0240                           | 3.9574                 | 98.34           | 4.9800            | 5.0536                 | 101.48           | 6.0240            | 5.9366                 | 98.55            |
| 4.                                     | 4.0240                           | 3.9844                 | 99.02           | 4.9800            | 4.9916                 | 100.23           | 6.0240            | 6.0975                 | 101.22           |
| 5.                                     | 4.0240                           | 4.0029                 | 99.48           | 4.9800            | 5.0731                 | 101.87           | 6.0240            | 6.1198                 | 101.59           |
| 6.                                     | 4.0240                           | 3.9538                 | 98.26           | 4.9800            | 4.9465                 | 99.33            | 6.0240            | 6.0647                 | 100.68           |
| Average:                               |                                  |                        | 100.49          |                   |                        |                  |                   |                        |                  |
| Standard Deviation:                    |                                  |                        | 1.34            |                   |                        |                  |                   |                        |                  |
| Relative standard deviation (RSD%):    |                                  |                        | 1.33            |                   |                        |                  |                   |                        |                  |
| Confidence interval (Probability 95%): |                                  |                        | 99.88 – 101.11  |                   |                        |                  |                   |                        |                  |

**Table S12.** Accuracy levels – real (theoretical) and determined concentrations of compound **1n** and mean percent recovery (%) of six injections of each accuracy concentration (80%, 100%, and 120% analytical concentrations)

| Sample No.                             | Compound <b>1n</b> concentration |                        |                 |                   |                        |                  |                   |                        |                  |
|----------------------------------------|----------------------------------|------------------------|-----------------|-------------------|------------------------|------------------|-------------------|------------------------|------------------|
|                                        | 4 µg/ mL solution                |                        |                 | 5 µg/ mL solution |                        |                  | 6 µg/ mL solution |                        |                  |
|                                        | Real<br>[µg/ mL]                 | Determined<br>[µg/ mL] | Recovery<br>[%] | Real<br>[µg/ mL]  | Determined<br>[µg/ mL] | Recovery,<br>[%] | Real<br>[µg/ mL]  | Determined<br>[µg/ mL] | Recovery,<br>[%] |
| 1.                                     | 4.1120                           | 4.1585                 | 101.13          | 4.9400            | 4.9708                 | 100.62           | 6.0960            | 6.0443                 | 99.15            |
| 2.                                     | 4.1120                           | 4.1828                 | 101.72          | 4.9400            | 4.9953                 | 101.12           | 6.0960            | 6.1840                 | 101.44           |
| 3.                                     | 4.1120                           | 4.1322                 | 100.49          | 4.9400            | 4.8838                 | 98.86            | 6.0960            | 6.2049                 | 101.79           |
| 4.                                     | 4.1120                           | 4.1020                 | 99.76           | 4.9400            | 4.9562                 | 100.33           | 6.0960            | 6.1416                 | 100.75           |
| 5.                                     | 4.1120                           | 4.1044                 | 99.82           | 4.9400            | 5.0147                 | 101.51           | 6.0960            | 6.0619                 | 99.44            |
| 6.                                     | 4.1120                           | 4.0721                 | 99.03           | 4.9400            | 4.9304                 | 99.81            | 6.0960            | 6.0620                 | 99.44            |
| Average:                               |                                  |                        | 100.34          |                   |                        |                  |                   |                        |                  |
| Standard Deviation:                    |                                  |                        | 0.97            |                   |                        |                  |                   |                        |                  |
| Relative standard deviation (RSD%):    |                                  |                        | 0.96            |                   |                        |                  |                   |                        |                  |
| Confidence interval (Probability 95%): |                                  |                        | 99.90 – 100.79  |                   |                        |                  |                   |                        |                  |

Compound **1n** content – Accuracy Results

## ROBUSTNESS

The robustness of an analytical procedure is a measure of its capacity to remain unaffected by small, but deliberate variations in method parameters and provides an indication of its reliability during normal usage.

It should show the reliability of an analysis with respect to deliberate variations in method parameters.

The following variations were investigated, while keeping all other chromatographic parameters unchanged (normal conditions, according to section 2 of this document, “*Description of the method*”):

- column temperature = 35°C, with constant normal chromatographic conditions;
- mobile phase composition:
  - Solvent A: Solvent B (91: 9, V/V);
  - Solvent A: Solvent B (95: 5, V/V);
- flow rate = 0.8 mL/min, other chromatographic conditions being maintained normal;
- flow rate = 1.2 mL/min, other chromatographic conditions being maintained normal;

### Preparation of solutions:

Stock solutions of 500 µg/ mL are prepared from each of the tested compounds:

*Stock solution 1h (500 µg/ mL):* 5 mg compound **1h** were transferred into a 10 mL volumetric flask, 5 mL acetonitrile R were added, the flask was sonicated for 5 minutes, cooled to room temperature and diluted to volume with acetonitrile R.

*Stock solution 1j (500 µg/ mL):* 5 mg compound **1j** were transferred into a 10 mL volumetric flask, 5 mL acetonitrile R were added, the flask was sonicated for 5 minutes, cooled to room temperature and diluted to volume with acetonitrile R.

*Stock solution 1i (500 µg/ mL):* 5 mg compound **1i** were transferred into a 10 mL volumetric flask, 5 mL acetonitrile R were added, the flask was sonicated for 5 minutes, cooled to room temperature and diluted to volume with acetonitrile R.

*Stock solution 1m (500 µg/ mL):* 5 mg compound **1m** were transferred into a 10 mL volumetric flask, 5 mL acetonitrile R were added, the flask was sonicated for 5 minutes, cooled to room temperature and diluted to volume with acetonitrile R.

*Stock solution 1g (500 µg/ mL):* 5 mg compound **1g** were transferred into a 10 mL volumetric flask, 5 mL acetonitrile R were added, the flask was sonicated for 5 minutes, cooled to room temperature and

diluted to volume with acetonitrile R.

*Stock solution 1n* (500  $\mu\text{g}/\text{mL}$ ): 5 mg compound **1n** were transferred into a 10 mL volumetric flask, 5 mL acetonitrile R were added, the flask was sonicated for 5 minutes, cooled to room temperature and diluted to volume with acetonitrile R.

*Standard solution* (5  $\mu\text{g}/\text{mL}$  compound **1h**, 5  $\mu\text{g}/\text{mL}$  compound **1j**, 5  $\mu\text{g}/\text{mL}$  compound **1i**, 5  $\mu\text{g}/\text{mL}$  compound **1m**, 5  $\mu\text{g}/\text{mL}$  compound **1g**, 5  $\mu\text{g}/\text{mL}$  compound **1n**): 0.25 mL of each stock solution were diluted to 25 mL with methanol R.

### Procedure:

The following sequence was used: SS, SS<sub>flow 0.8 mL/min</sub>, SS<sub>flow 1.2 mL/min</sub>, SS<sub>m.phase 91/9</sub>, SS<sub>m.phase 95/5</sub>, SS<sub>temp. 35°C</sub>, where,

SS – Standard Solution, chromatographic conditions maintained normal;

SS<sub>flow 0.8 mL/min</sub> – Standard Solution, flow rate = 0.8 mL/min, other chromatographic conditions being maintained normal;

SS<sub>flow 1.2 mL/min</sub> – Standard Solution, flow rate = 1.2 mL/min, other chromatographic conditions being maintained normal;

SS<sub>m.phase 91/9</sub> – Standard Solution, registered with altered percentage of mobile phase, Solvent A: Solvent B (91: 9, V/V);

SS<sub>m.phase 95/5</sub> – Standard Solution, registered with altered percentage of mobile phase, Solvent A: Solvent B (95: 5, V/V);

SS<sub>temp. 35°C</sub> – Standard Solution, column temperature = 35°C.

## Results:

The effect of small variations of chromatographic parameters on the performance of the method is presented in the **Table S13**.

**Table S13.** Robustness results for the proposed RP-HPLC analytical method

| Robustness – Deliberate Variations in Method Parameters<br>– 5 µg/ mL Solution 1h, 1j, 1i, 1m, 1g, 1n |                                                     |                           |                                   |                           |                                   |                           |                       |                           |                       |                           |                              |                           |
|-------------------------------------------------------------------------------------------------------|-----------------------------------------------------|---------------------------|-----------------------------------|---------------------------|-----------------------------------|---------------------------|-----------------------|---------------------------|-----------------------|---------------------------|------------------------------|---------------------------|
| Main peaks names                                                                                      | Validated chromatographic parameters <sup>(1)</sup> |                           | Mobile phase variation            |                           |                                   |                           | Flow rate variation   |                           |                       |                           | Column temperature variation |                           |
|                                                                                                       |                                                     |                           | Solvent A: Solvent B (91: 9, V/V) |                           | Solvent A: Solvent B (95: 5, V/V) |                           | Flow Rate 0.8 mL/ min |                           | Flow Rate 1.2 mL/ min |                           | Column Temperature 35°C      |                           |
|                                                                                                       | Ret. Time [min.]                                    | Resolution <sup>(2)</sup> | Ret. Time [min.]                  | Resolution <sup>(2)</sup> | Ret. Time [min.]                  | Resolution <sup>(2)</sup> | Ret. Time [min.]      | Resolution <sup>(2)</sup> | Ret. Time [min.]      | Resolution <sup>(2)</sup> | Ret. Time [min.]             | Resolution <sup>(2)</sup> |
| <b>1h</b>                                                                                             | 11.134                                              |                           | 12.367                            |                           | 10.095                            |                           | 13.941                |                           | 9.307                 |                           | 10.289                       |                           |
| <b>1j</b>                                                                                             | 12.430                                              | 3.23                      | 13.947                            | 3.49                      | 11.169                            | 2.96                      | 15.571                | 3.46                      | 10.393                | 3.06                      | 11.384                       | 3.10                      |
| <b>1i</b>                                                                                             | 13.600                                              | 2.67                      | 15.254                            | 2.60                      | 12.236                            | 2.69                      | 17.044                | 2.85                      | 11.374                | 2.53                      | 12.392                       | 2.63                      |
| <b>1m</b>                                                                                             | 14.969                                              | 2.82                      | 16.984                            | 3.18                      | 13.317                            | 2.50                      | 18.751                | 2.99                      | 12.510                | 2.64                      | 13.733                       | 3.20                      |
| <b>1g</b>                                                                                             | 22.319                                              | 11.88                     | 25.732                            | 12.37                     | 19.563                            | 11.42                     | 27.995                | 12.66                     | 18.659                | 11.21                     | 19.759                       | 11.42                     |
| <b>1n</b>                                                                                             | 25.466                                              | 4.05                      | 29.367                            | 4.16                      | 22.208                            | 3.87                      | 31.927                | 4.28                      | 21.292                | 3.83                      | 22.509                       | 4.19                      |

<sup>(1)</sup> The method has been validated by setting the following chromatographic conditions: mobile phase = Solvent A: Solvent B (93: 7, V/V), flow rate = 1.0 mL/min, column temperature = room temperature;

<sup>(2)</sup> Resolution calculated between couples of two successive peaks.

## CONCLUSIONS

After evaluating the specificity of the method, no interference was observed between the analytical signal of solvent, and the peaks of interest (compounds **1h**, **1j**, **1i**, **1m**, **1g**, **1n**). Purity angles of all peaks recorded in the solutions chromatograms are below their corresponding thresholds, indicating proper separation of the compounds.

Therefore, the analytical procedure used to separate and quantitatively evaluate the compounds **1h**, **1j**, **1i**, **1m**, **1g**, and **1n** is **specific**.

The **precision** of the analytical method has been evaluated by repeatability and RSD values do not exceed the acceptance threshold ( $\leq 2.0\%$ ).

The detection limit and quantitation limit results determined on *test solutions* range between 0.0184 – 0.0252  $\mu\text{g}/\text{mL}$ , and 1.228 – 1.594  $\mu\text{g}/\text{mL}$ . The  $R^2$  correlation coefficient of the **LOQ** and **linearity** curves are greater than 0.99, indicating that the method does not face procedural errors in the quantitative analysis, over the specified concentrations interval.

The **accuracy** study of the HPLC method showed that the determined concentrations of compounds **1h**, **1j**, **1i**, **1m**, **1g**, and **1n** are within proposed acceptance criterion, 98% - 102%. The given range is related to the real content of test solutions.

The effect of small variations of chromatographic parameters on the performance of the method has been evaluated. Obtained results indicate that the method is **robust**, allowing for proper separation of **1h**, **1j**, **1i**, **1m**, **1g**, and **1n** peaks, as demonstrated by a resolution value greater than or equal to 2.0 for the investigated variations of the chromatographic method.

Considering the presented results, the method for quantitative determination of compounds **1h**, **1j**, **1i**, **1m**, **1g**, and **1n** fulfills the acceptance criteria for the parameters mentioned in the validation report and can be used for routine quality control analyses.

**Quantitative determination of  
*compounds 1g, 1h, 1i, 1j, 1m, 1n***  
**- Validation of the analytical method -**

Validation parameters:

- Specificity
- Precision 1
- Precision 2
- LOD – LOQ
- Linearity
- Range
- Accuracy
- Robustness



**Quantitative determination of  
*compounds 1g, 1h, 1i, 1j, 1m, 1n***  
**- Validation of the analytical method -**

Validation parameters:

- **Specificity**
- Precision 1
- Precision 2
- LOD – LOQ
- Linearity
- Range
- Accuracy
- Robustness

## Chloride\_Ethyl\_Specificity

Reported by User: Roman Roxana (roman\_roxana)  
 Acquisition Server: Waters-cd3  
 Project Name: Teste\Thiazides  
 Sample Set Name: Seria Etil\_Cl Specificity  
 Code column: Inertsil ODS-3 250\*4.6 mm 5um

### SAMPLE INFORMATION

|                   |                    |                     |                                |
|-------------------|--------------------|---------------------|--------------------------------|
| Sample Name:      | Solvent - Methanol | Date Acquired:      | 2/13/2023 6:01:17 PM EET       |
| Sample Type:      | Standard           | Acq. Method Set:    | Seria Etil_Cl 7 93 Specificity |
| Vial:             | 7                  | Date Processed:     | 2/27/2023 7:02:57 AM EET       |
| Injection #:      | 1                  | Processing Method:  | Seria Etil_Cl 7 93 Specificity |
| Injection Volume: | 10.00 ul           | Channel Name:       | Extract 275                    |
| Run Time:         | 30.0 Minutes       | Proc. Chnl. Descr.: | 2998 PDA 275.0 nm (2998        |
| Acquired By:      | roman_roxana       |                     |                                |

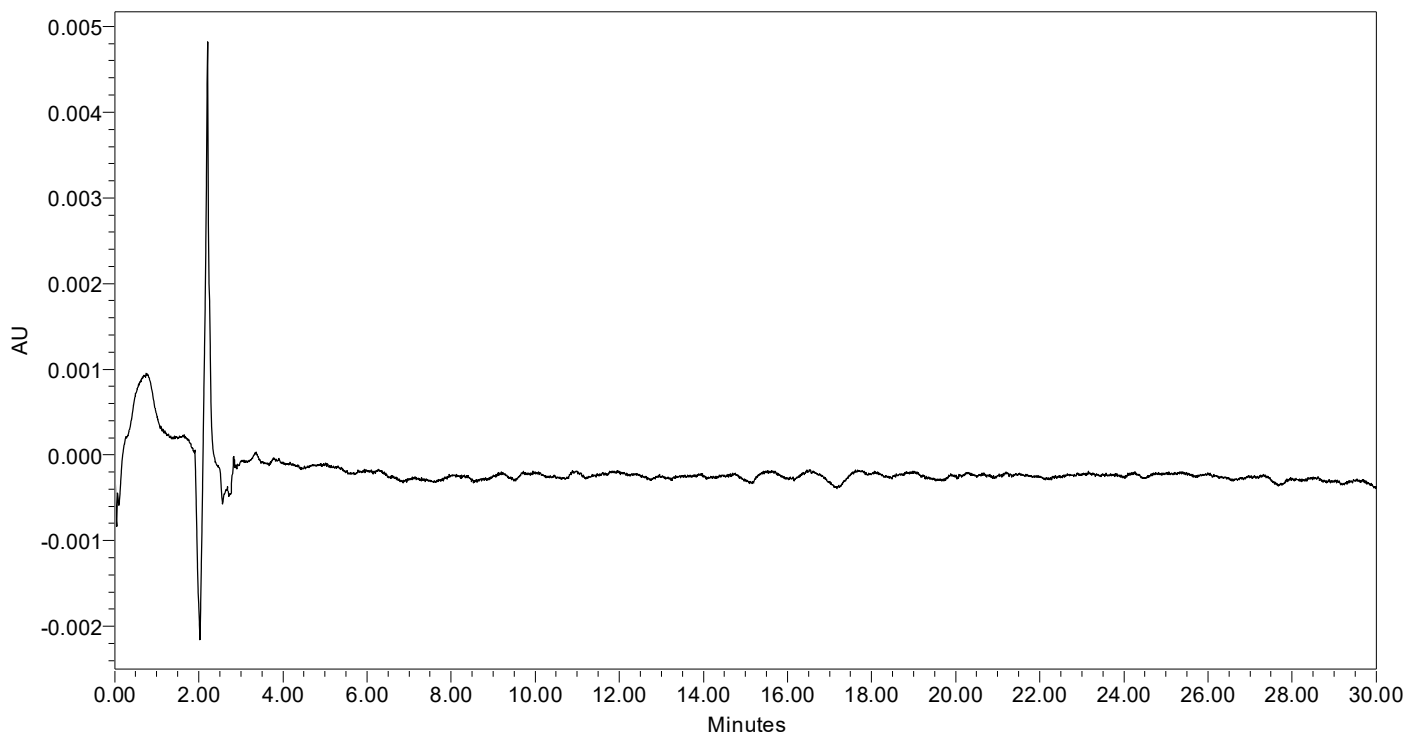

#### Error Log

Basic LC Peaks Table group contains information that doesn't match the data being reported.

## Chloride\_Ethyl\_Specificity

Reported by User: Roman Roxana (roman\_roxana)  
 Acquisition Server: Waters-cd3  
 Project Name: Teste\Thiazides  
 Sample Set Name: Seria Etil\_Cl Specificity  
 Code column: Inertsil ODS-3 250\*4.6 mm 5um

### SAMPLE INFORMATION

|                   |                      |                     |                                |
|-------------------|----------------------|---------------------|--------------------------------|
| Sample Name:      | Solution 1h 5 ug/ mL | Date Acquired:      | 2/25/2023 11:31:26 AM EET      |
| Sample Type:      | Standard             | Acq. Method Set:    | Seria Etil_Cl 7 93 Specificity |
| Vial:             | 2                    | Date Processed:     | 2/27/2023 6:56:15 AM EET       |
| Injection #:      | 1                    | Processing Method:  | Seria Etil_Cl 7 93 Specificity |
| Injection Volume: | 10.00 ul             | Channel Name:       | Extract 275                    |
| Run Time:         | 30.0 Minutes         | Proc. Chnl. Descr.: | 2998 PDA 275.0 nm (2998        |
| Acquired By:      | roman_roxana         |                     |                                |

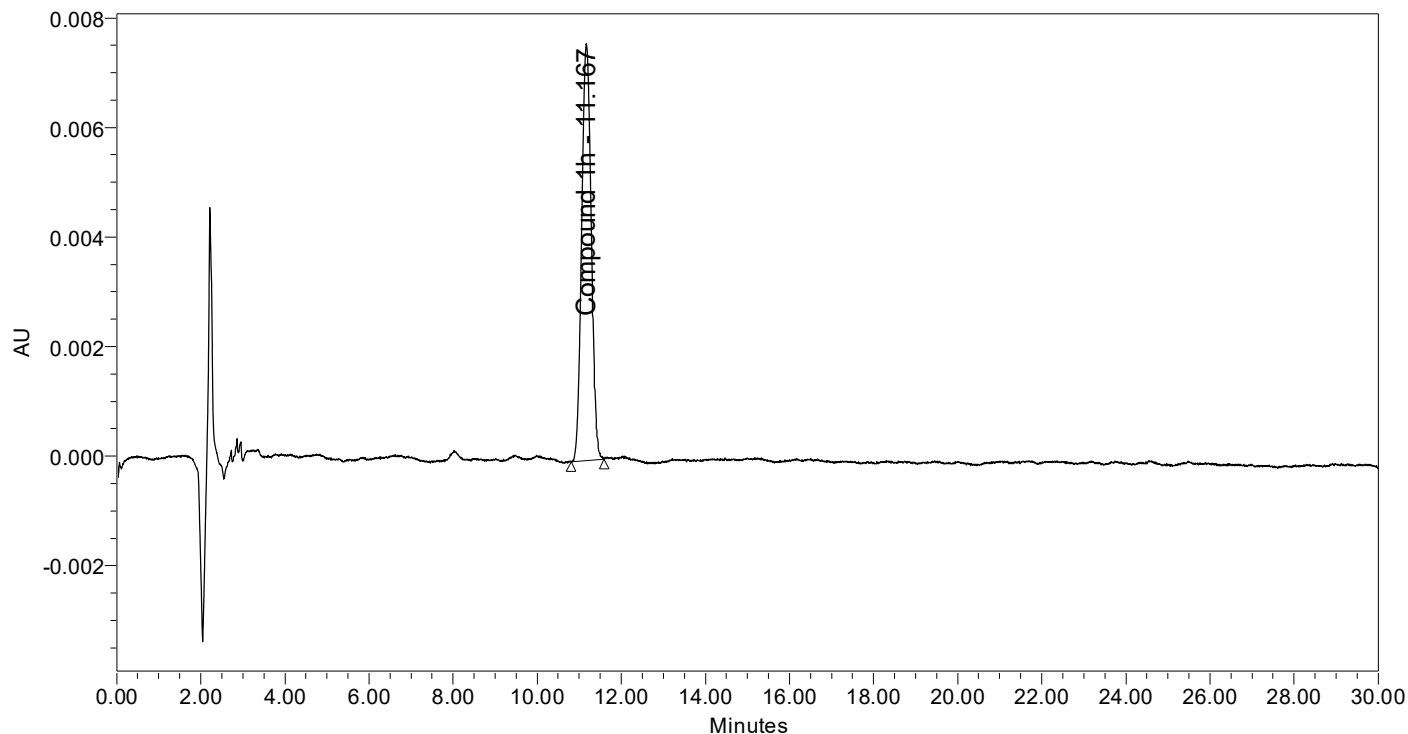

|   | Peak Name   | RT     | Area   | Height (μV) | Purity1 Angle | Purity1 Threshold | Symmetry Factor | EP Plate Count |
|---|-------------|--------|--------|-------------|---------------|-------------------|-----------------|----------------|
| 1 | Compound 1h | 11.167 | 119025 | 7615        | 0.299         | 0.650             | 1.06            | 1.135571e+004  |

# Chloride\_Ethyl\_Specificity

Reported by User: Roman Roxana (roman\_roxana)  
 Acquisition Server: Waters-cd3  
 Project Name: Teste\Thiazides  
 Sample Set Name: Seria Etil\_Cl Specificity  
 Code column: Inertsil ODS-3 250\*4.6 mm 5um

## SAMPLE INFORMATION

|                   |                        |                     |                                |
|-------------------|------------------------|---------------------|--------------------------------|
| Sample Name:      | Solution 1j 5.0 ug/ mL | Date Acquired:      | 2/25/2023 12:54:58 PM EET      |
| Sample Type:      | Standard               | Acq. Method Set:    | Seria Etil_Cl 7 93 Specificity |
| Vial:             | 4                      | Date Processed:     | 2/27/2023 6:55:47 AM EET       |
| Injection #:      | 1                      | Processing Method:  | Seria Etil_Cl 7 93 Specificity |
| Injection Volume: | 10.00 ul               | Channel Name:       | Extract 275                    |
| Run Time:         | 30.0 Minutes           | Proc. Chnl. Descr.: | 2998 PDA 275.0 nm (2998        |
| Acquired By:      | roman_roxana           |                     |                                |

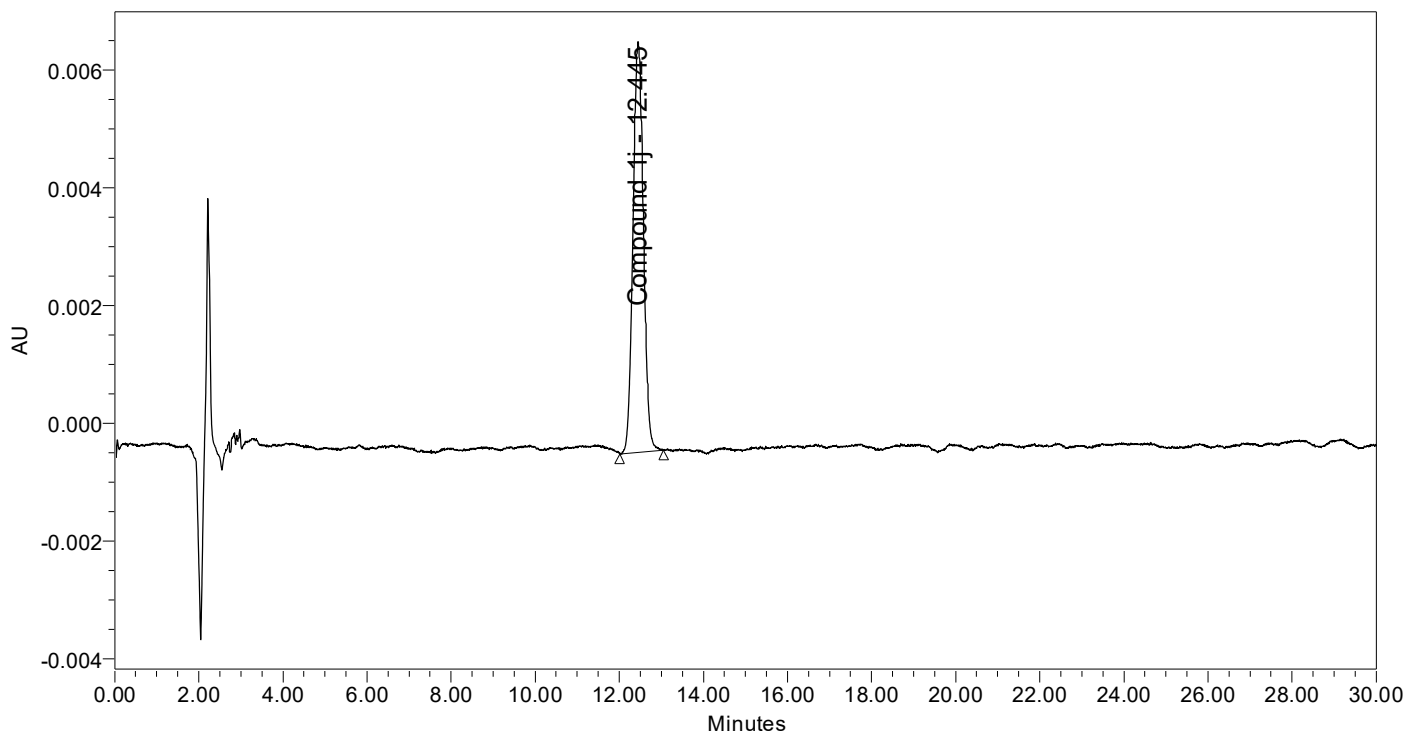

|   | Peak Name   | RT     | Area   | Height (µV) | Purity1 Angle | Purity1 Threshold | Symmetry Factor | EP Plate Count |
|---|-------------|--------|--------|-------------|---------------|-------------------|-----------------|----------------|
| 1 | Compound 1j | 12.445 | 122578 | 6978        | 0.387         | 0.642             | 1.07            | 1.134319e+004  |

# Chloride\_Ethyl\_Specificity

Reported by User: Roman Roxana (roman\_roxana)  
 Acquisition Server: Waters-cd3  
 Project Name: Teste\Thiazides  
 Sample Set Name: Seria Etil\_Cl Specificity  
 Code column: Inertsil ODS-3 250\*4.6 mm 5um

## SAMPLE INFORMATION

|                   |                        |                     |                                |
|-------------------|------------------------|---------------------|--------------------------------|
| Sample Name:      | Solution 1i 5.0 ug/ mL | Date Acquired:      | 2/25/2023 12:17:03 PM EET      |
| Sample Type:      | Standard               | Acq. Method Set:    | Seria Etil_Cl 7 93 Specificity |
| Vial:             | 3                      | Date Processed:     | 2/27/2023 6:56:09 AM EET       |
| Injection #:      | 1                      | Processing Method:  | Seria Etil_Cl 7 93 Specificity |
| Injection Volume: | 10.00 ul               | Channel Name:       | Extract 275                    |
| Run Time:         | 30.0 Minutes           | Proc. Chnl. Descr.: | 2998 PDA 275.0 nm (2998        |
| Acquired By:      | roman_roxana           |                     |                                |

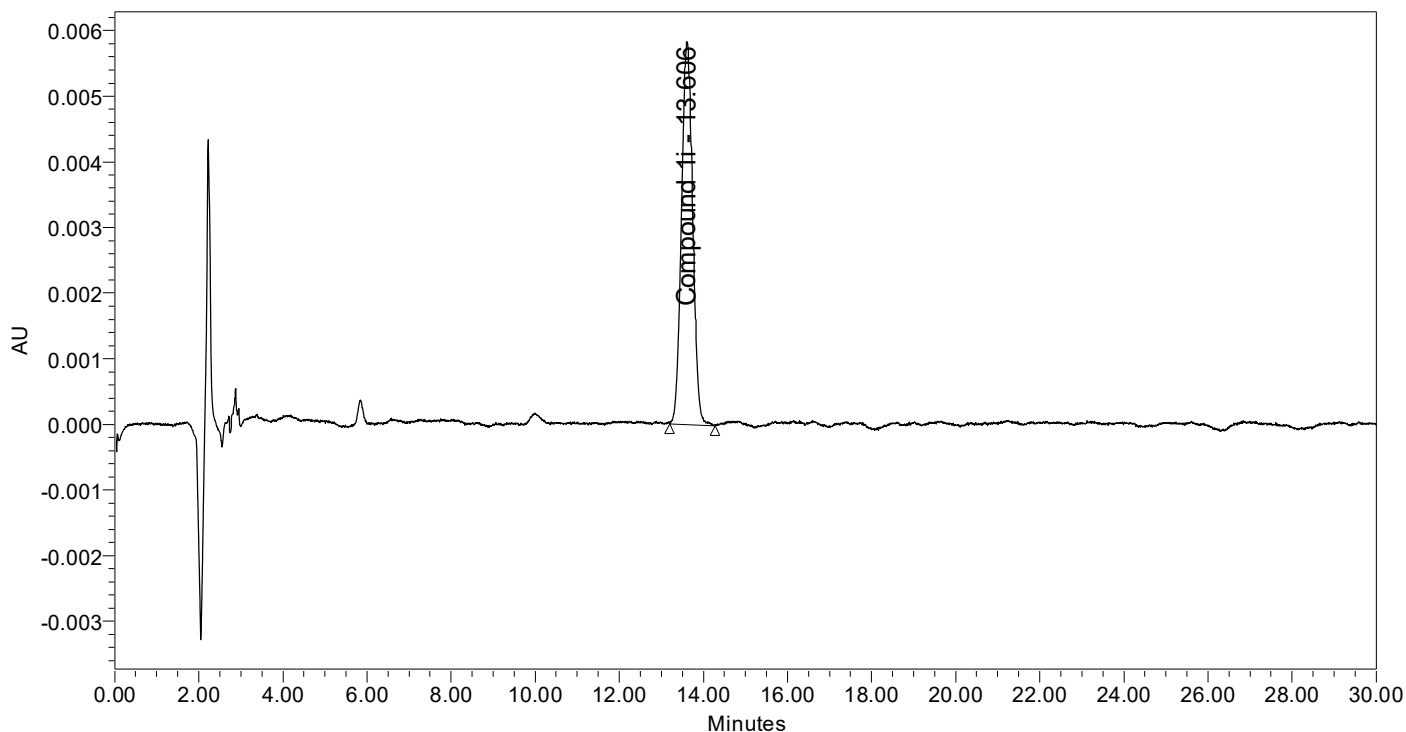

|   | Peak Name   | RT     | Area   | Height (µV) | Purity1 Angle | Purity1 Threshold | Symmetry Factor | EP Plate Count |
|---|-------------|--------|--------|-------------|---------------|-------------------|-----------------|----------------|
| 1 | Compound 1i | 13.606 | 110199 | 5835        | 0.337         | 0.636             | 1.07            | 1.165344e+004  |

# Chloride\_Ethyl\_Specificity

Reported by User: Roman Roxana (roman\_roxana)  
 Acquisition Server: Waters-cd3  
 Project Name: Teste\Thiazides  
 Sample Set Name: Seria Etil\_Cl Specificity  
 Code column: Inertsil ODS-3 250\*4.6 mm 5um

## SAMPLE INFORMATION

|                   |                        |                     |                                |
|-------------------|------------------------|---------------------|--------------------------------|
| Sample Name:      | Solution 1m 5.0 ug/ mL | Date Acquired:      | 2/25/2023 1:40:57 PM EET       |
| Sample Type:      | Standard               | Acq. Method Set:    | Seria Etil_Cl 7 93 Specificity |
| Vial:             | 5                      | Date Processed:     | 2/27/2023 6:58:44 AM EET       |
| Injection #:      | 1                      | Processing Method:  | Seria Etil_Cl 7 93 Specificity |
| Injection Volume: | 10.00 ul               | Channel Name:       | Extract 275                    |
| Run Time:         | 30.0 Minutes           | Proc. Chnl. Descr.: | 2998 PDA 275.0 nm (2998)       |
| Acquired By:      | roman_roxana           |                     |                                |

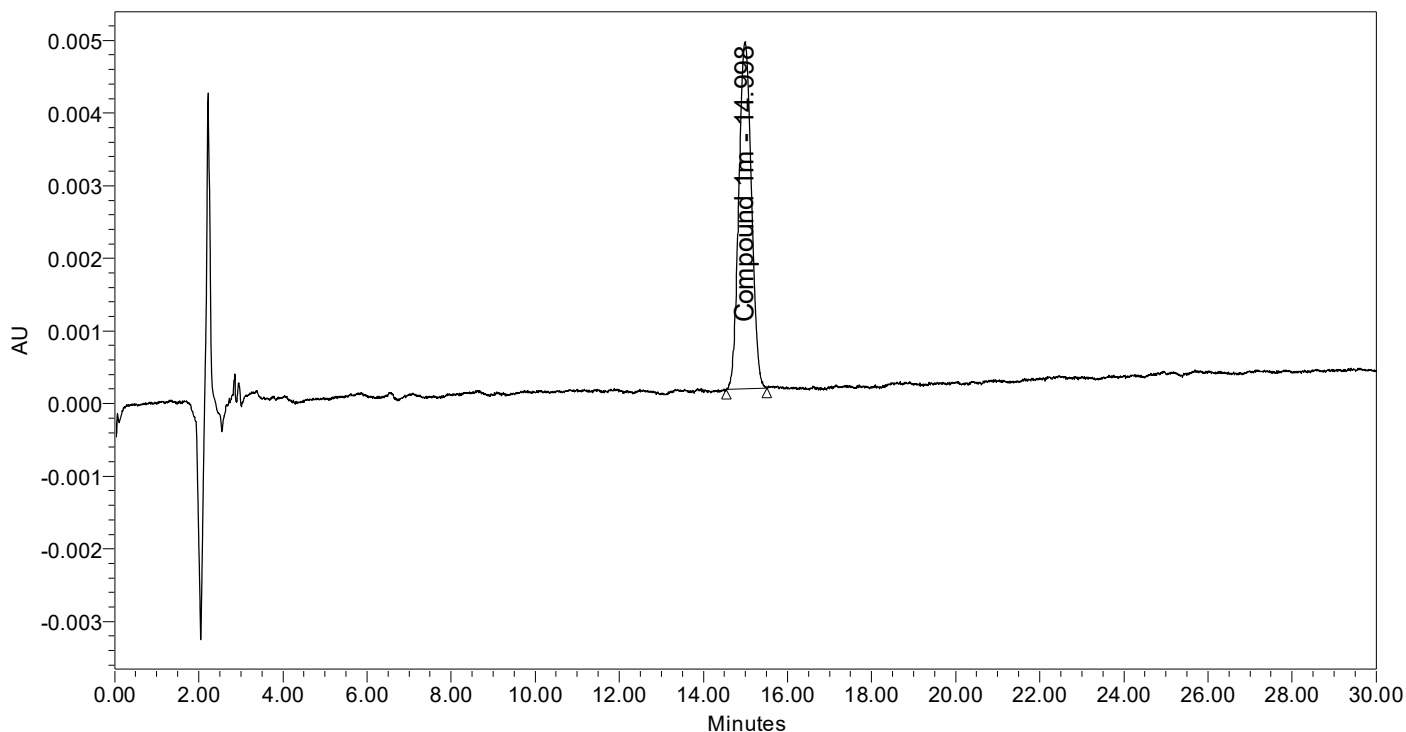

|   | Peak Name   | RT     | Area  | Height (µV) | Purity1 Angle | Purity1 Threshold | Symmetry Factor | EP Plate Count |
|---|-------------|--------|-------|-------------|---------------|-------------------|-----------------|----------------|
| 1 | Compound 1m | 14.998 | 99488 | 4779        | 0.380         | 0.604             | 1.02            | 1.145172e+004  |

# Chloride\_Ethyl\_Specificity

Reported by User: Roman Roxana (roman\_roxana)  
 Acquisition Server: Waters-cd3  
 Project Name: Teste\Thiazides  
 Sample Set Name: Seria Etil\_Cl Specificity  
 Code column: Inertsil ODS-3 250\*4.6 mm 5um

## SAMPLE INFORMATION

|                   |                        |                     |                                |
|-------------------|------------------------|---------------------|--------------------------------|
| Sample Name:      | Solution 1g 5.0 ug/ mL | Date Acquired:      | 2/25/2023 10:50:51 AM EET      |
| Sample Type:      | Standard               | Acq. Method Set:    | Seria Etil_Cl 7 93 Specificity |
| Vial:             | 1                      | Date Processed:     | 2/27/2023 6:55:34 AM EET       |
| Injection #:      | 1                      | Processing Method:  | Seria Etil_Cl 7 93 Specificity |
| Injection Volume: | 10.00 ul               | Channel Name:       | Extract 275                    |
| Run Time:         | 30.0 Minutes           | Proc. Chnl. Descr.: | 2998 PDA 275.0 nm (2998        |
| Acquired By:      | roman_roxana           |                     |                                |

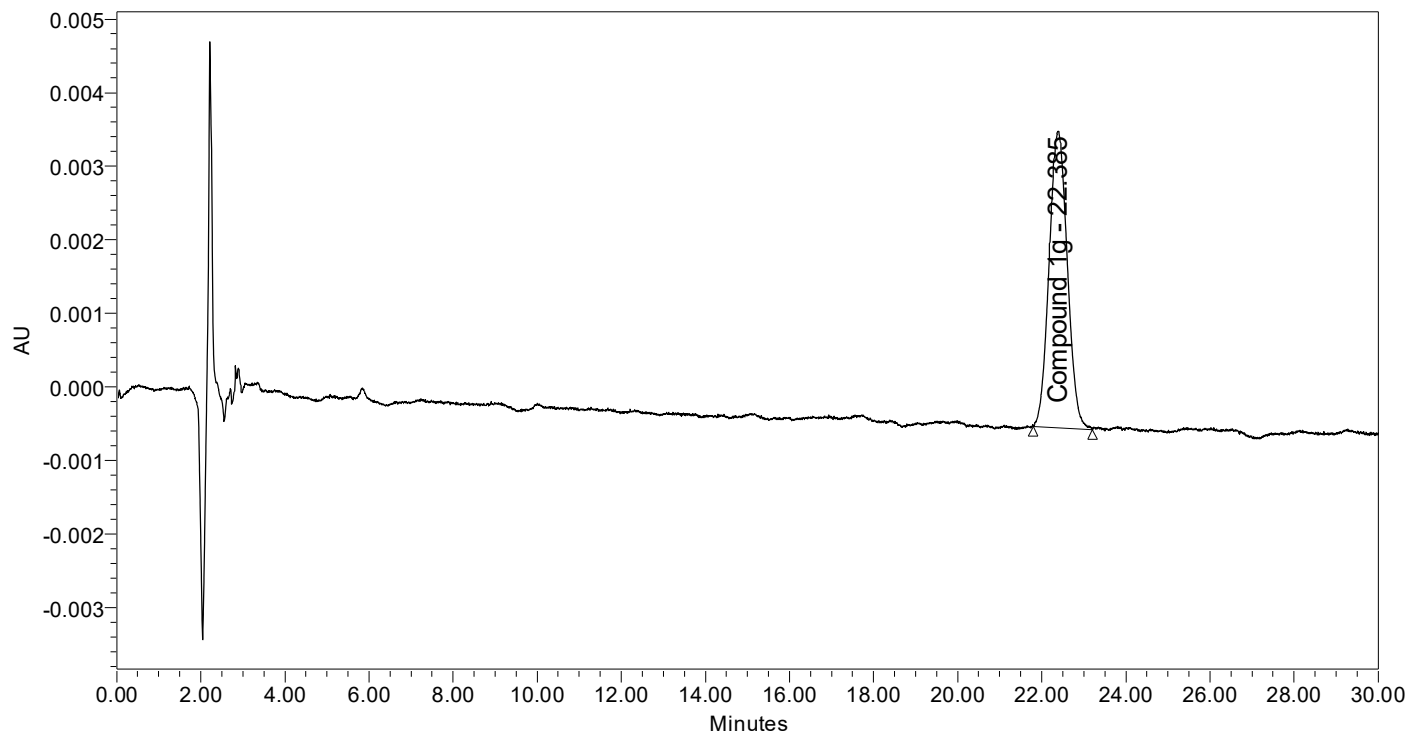

|   | Peak Name   | RT     | Area   | Height (μV) | Purity1 Angle | Purity1 Threshold | Symmetry Factor | EP Plate Count |
|---|-------------|--------|--------|-------------|---------------|-------------------|-----------------|----------------|
| 1 | Compound 1g | 22.385 | 122960 | 4032        | 0.785         | 1.369             | 1.07            | 1.209107e+004  |

## Chloride\_Ethyl\_Specificity

Reported by User: Roman Roxana (roman\_roxana)  
 Acquisition Server: Waters-cd3  
 Project Name: Teste\Thiazides  
 Sample Set Name: Seria Etil\_Cl Specificity  
 Code column: Inertsil ODS-3 250\*4.6 mm 5um

### SAMPLE INFORMATION

|                   |                        |                     |                                |
|-------------------|------------------------|---------------------|--------------------------------|
| Sample Name:      | Solution 1n 5.0 ug/ mL | Date Acquired:      | 2/25/2023 2:26:35 PM EET       |
| Sample Type:      | Unknown                | Acq. Method Set:    | Seria Etil_Cl 7 93 Specificity |
| Vial:             | 6                      | Date Processed:     | 2/27/2023 6:58:56 AM EET       |
| Injection #:      | 1                      | Processing Method:  | Seria Etil_Cl 7 93 Specificity |
| Injection Volume: | 10.00 ul               | Channel Name:       | Extract 275                    |
| Run Time:         | 30.0 Minutes           | Proc. Chnl. Descr.: | 2998 PDA 275.0 nm (2998        |
| Acquired By:      | roman_roxana           |                     |                                |

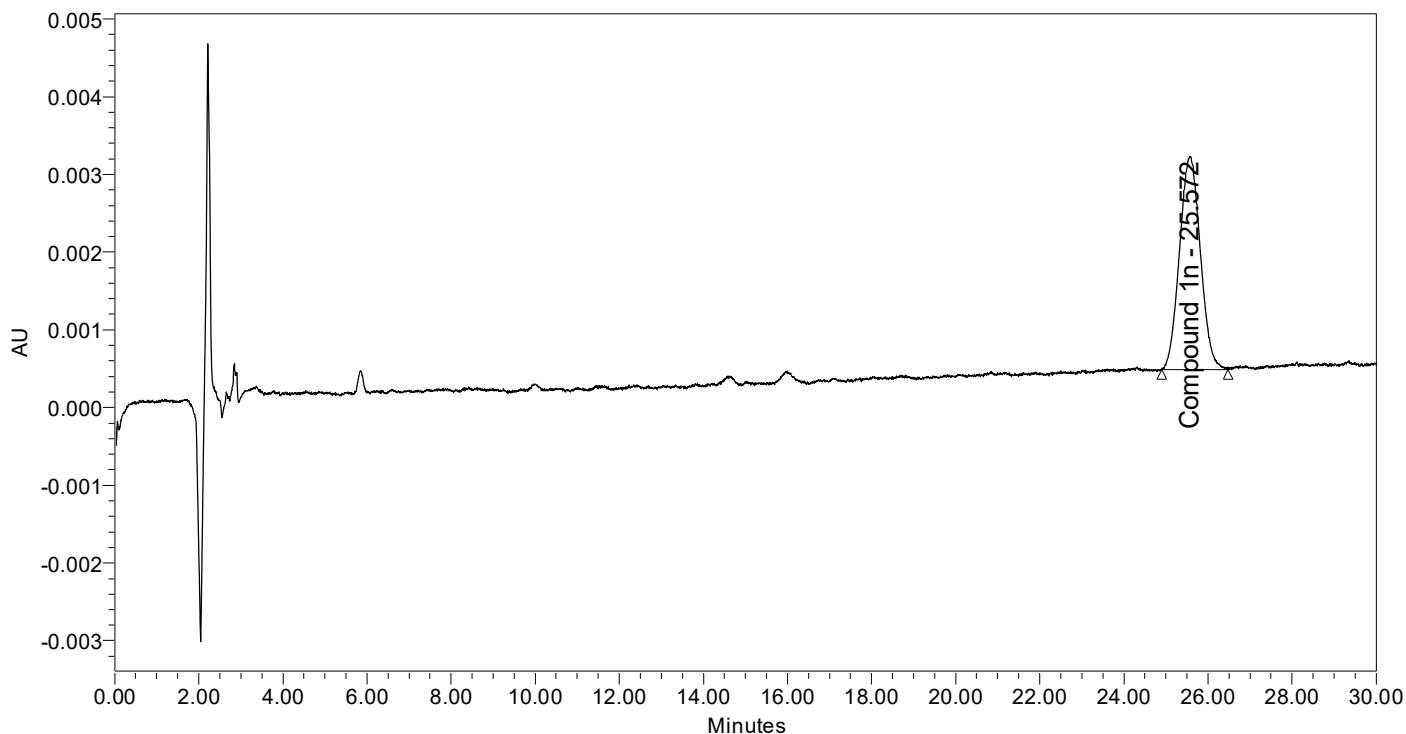

|   | Peak Name   | RT     | Area  | Height (μV) | Purity1 Angle | Purity1 Threshold | Symmetry Factor | EP Plate Count |
|---|-------------|--------|-------|-------------|---------------|-------------------|-----------------|----------------|
| 1 | Compound 1n | 25.572 | 95177 | 2744        | 0.693         | 1.463             | 1.05            | 1.208410e+004  |



**Quantitative determination of**  
***compounds 1g, 1h, 1i, 1j, 1m, 1n***

**- Validation of the analytical method -**

Validation parameters:

- Specificity
- **Precision 1**
- Precision 2
- LOD – LOQ
- Linearity
- Range
- Accuracy
- Robustness

# Chloride\_Ethyl\_Precision 1

Reported by User: Roman Roxana (roman\_roxana)  
 Acquisition Server: Waters-cd3  
 Project Name: Teste\Thiazides  
 Sample Set Name: Seria Etil\_Cl 7 93 Accuracy  
 Code column: Inertsil ODS-3 250\*4.6 mm 5um LA140

## SAMPLE INFORMATION

|                   |                     |                     |                             |
|-------------------|---------------------|---------------------|-----------------------------|
| Sample Name:      | Solution 5.0 ug/ mL | Date Acquired:      | 2/11/2023 10:54:16 PM EET   |
| Sample Type:      | Unknown             | Acq. Method Set:    | Seria Etil_Cl 7 93 Accuracy |
| Vial:             | 8                   | Date Processed:     | 4/19/2023 2:19:19 PM EEST   |
| Injection #:      | 1                   | Processing Method:  | Seria Etil_Cl 7 93 Accuracy |
| Injection Volume: | 10.00 ul            | Channel Name:       | Extract 275                 |
| Run Time:         | 35.0 Minutes        | Proc. Chnl. Descr.: | 2998 PDA 275.0 nm (2998)    |
| Acquired By:      | roman_roxana        |                     |                             |

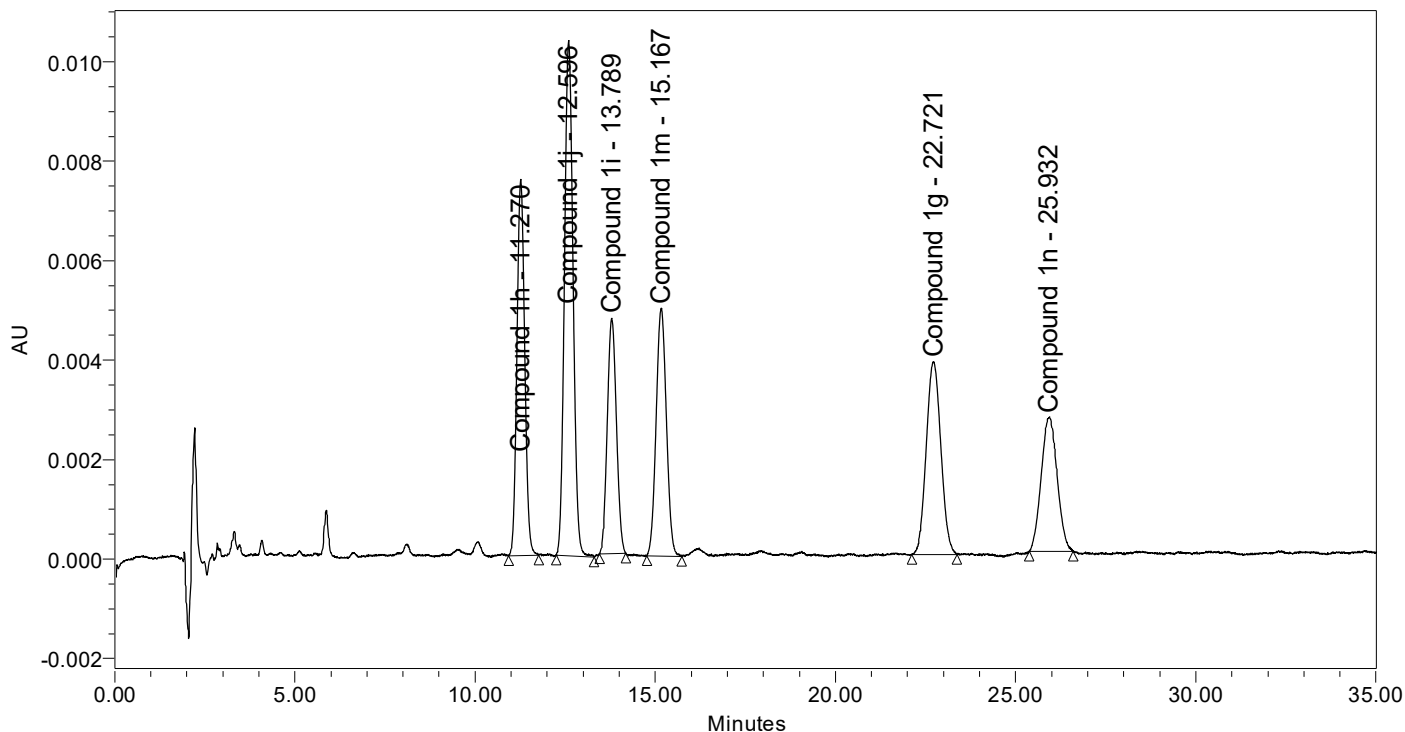

|   | Peak Name   | RT     | Area   | Height (μV) | Resolution |
|---|-------------|--------|--------|-------------|------------|
| 1 | Compound 1h | 11.270 | 111591 | 7560        |            |
| 2 | Compound 1j | 12.596 | 169135 | 10358       | 3.24       |
| 3 | Compound 1i | 13.789 | 82009  | 4729        | 2.67       |
| 4 | Compound 1m | 15.167 | 97170  | 4975        | 2.81       |
| 5 | Compound 1g | 22.721 | 108491 | 3876        | 11.98      |

|   | Peak Name   | RT     | Area  | Height (μV) | Resolution |
|---|-------------|--------|-------|-------------|------------|
| 6 | Compound 1n | 25.932 | 84215 | 2703        | 4.06       |

# Chloride\_Ethyl\_Precision 1

Reported by User: Roman Roxana (roman\_roxana)  
 Acquisition Server: Waters-cd3  
 Project Name: Teste\Thiazides  
 Sample Set Name: Seria Etil\_CI 7 93 Accuracy  
 Code column: Inertsil ODS-3 250\*4.6 mm 5um LA140

## SAMPLE INFORMATION

|                   |                     |                     |                             |
|-------------------|---------------------|---------------------|-----------------------------|
| Sample Name:      | Solution 5.0 ug/ mL | Date Acquired:      | 2/11/2023 11:29:57 PM EET   |
| Sample Type:      | Unknown             | Acq. Method Set:    | Seria Etil_CI 7 93 Accuracy |
| Vial:             | 9                   | Date Processed:     | 4/19/2023 2:20:41 PM EEST   |
| Injection #:      | 1                   | Processing Method:  | Seria Etil_CI 7 93 Accuracy |
| Injection Volume: | 10.00 ul            | Channel Name:       | Extract 275                 |
| Run Time:         | 35.0 Minutes        | Proc. Chnl. Descr.: | 2998 PDA 275.0 nm (2998)    |
| Acquired By:      | roman_roxana        |                     |                             |

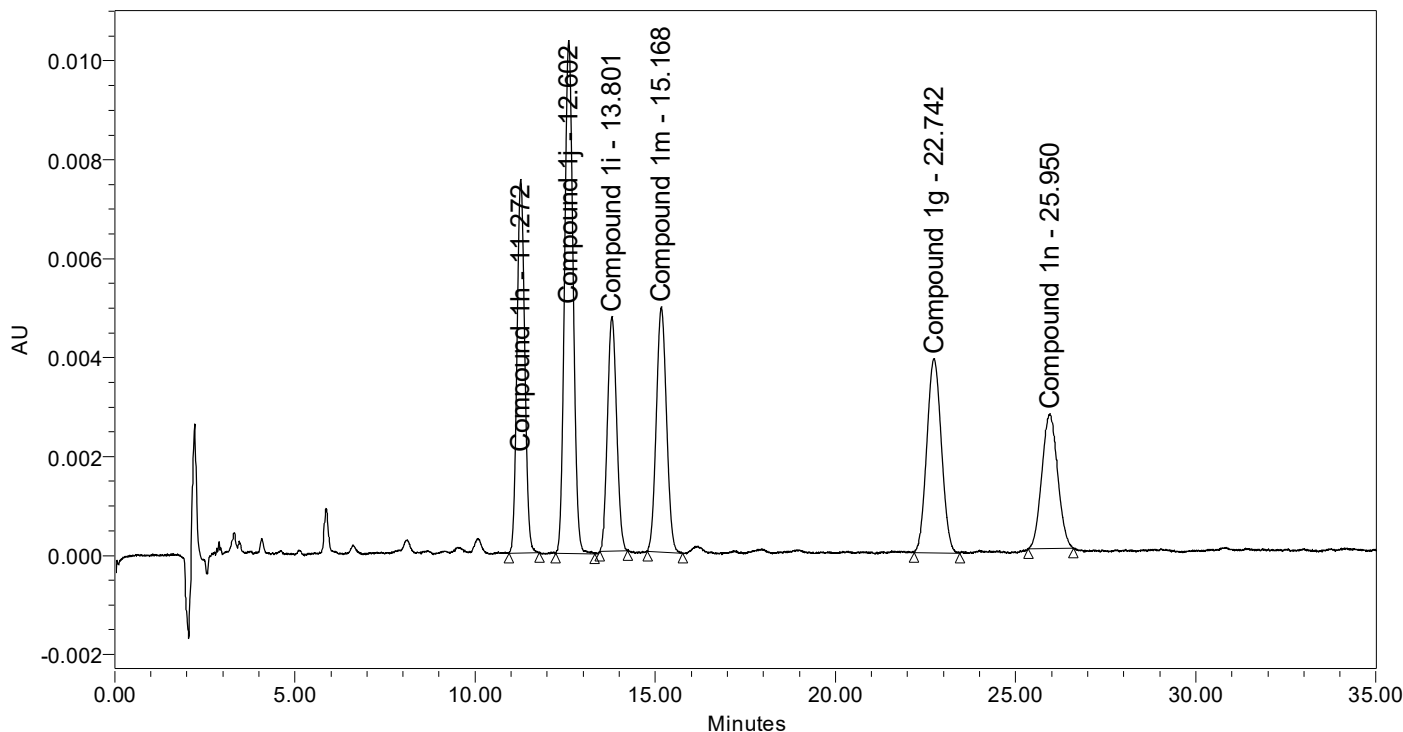

|   | Peak Name   | RT     | Area   | Height (μV) | Resolution |
|---|-------------|--------|--------|-------------|------------|
| 1 | Compound 1h | 11.272 | 111110 | 7556        |            |
| 2 | Compound 1j | 12.602 | 168465 | 10362       | 3.26       |
| 3 | Compound 1i | 13.801 | 82735  | 4741        | 2.68       |
| 4 | Compound 1m | 15.168 | 96179  | 4953        | 2.79       |
| 5 | Compound 1g | 22.742 | 109245 | 3926        | 12.05      |

|   | Peak Name   | RT     | Area  | Height (μV) | Resolution |
|---|-------------|--------|-------|-------------|------------|
| 6 | Compound 1n | 25.950 | 84630 | 2728        | 4.06       |

# Chloride\_Ethyl\_Precision 1

Reported by User: Roman Roxana (roman\_roxana)  
 Acquisition Server: Waters-cd3  
 Project Name: Teste\Thiazides  
 Sample Set Name: Seria Etil\_CI 7 93 Accuracy  
 Code column: Inertsil ODS-3 250\*4.6 mm 5um LA140

## SAMPLE INFORMATION

|                   |                     |                     |                             |
|-------------------|---------------------|---------------------|-----------------------------|
| Sample Name:      | Solution 5.0 ug/ mL | Date Acquired:      | 2/12/2023 12:05:37 AM EET   |
| Sample Type:      | Unknown             | Acq. Method Set:    | Seria Etil_CI 7 93 Accuracy |
| Vial:             | 10                  | Date Processed:     | 4/19/2023 2:21:41 PM EEST   |
| Injection #:      | 1                   | Processing Method:  | Seria Etil_CI 7 93 Accuracy |
| Injection Volume: | 10.00 ul            | Channel Name:       | Extract 275                 |
| Run Time:         | 35.0 Minutes        | Proc. Chnl. Descr.: | 2998 PDA 275.0 nm (2998)    |
| Acquired By:      | roman_roxana        |                     |                             |

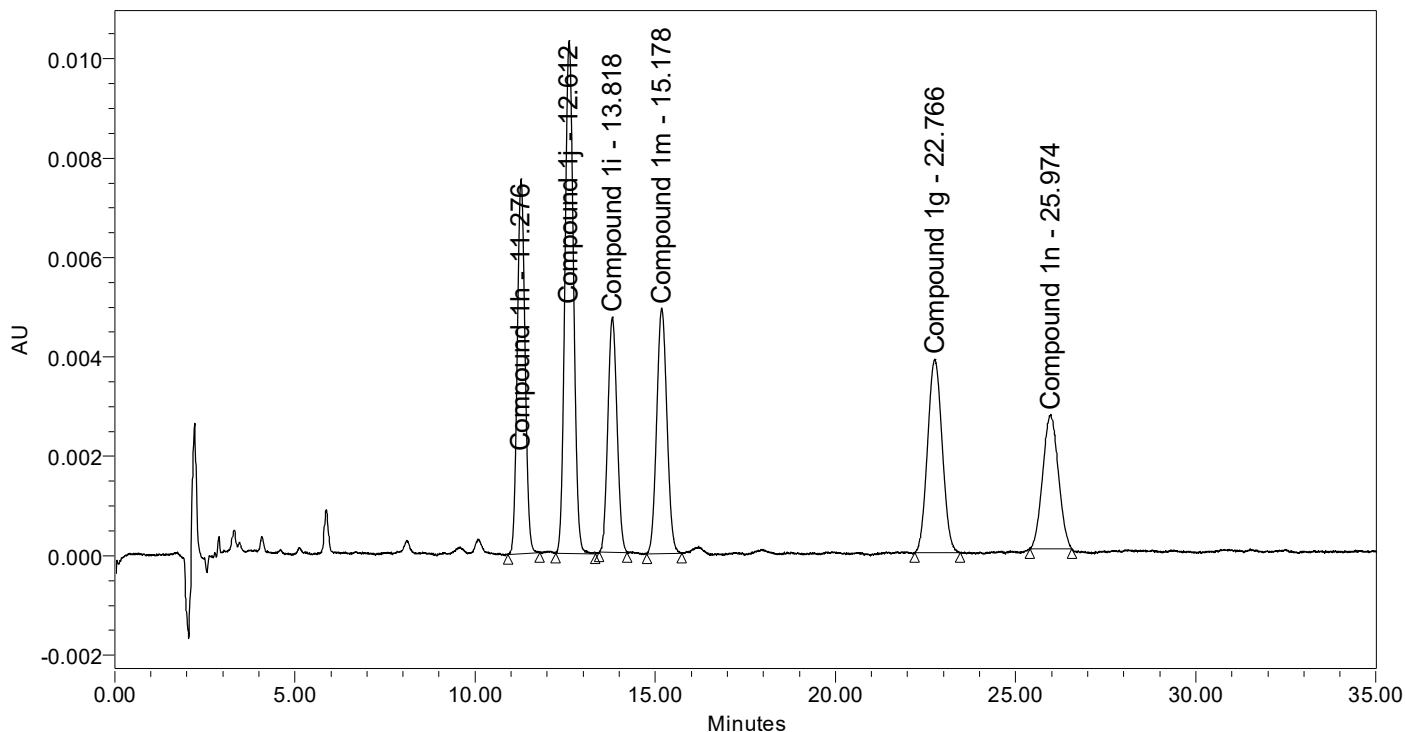

|   | Peak Name   | RT     | Area   | Height (μV) | Resolution |
|---|-------------|--------|--------|-------------|------------|
| 1 | Compound 1h | 11.276 | 111024 | 7548        |            |
| 2 | Compound 1j | 12.612 | 168231 | 10320       | 3.27       |
| 3 | Compound 1i | 13.818 | 82661  | 4734        | 2.69       |
| 4 | Compound 1m | 15.178 | 96381  | 4942        | 2.77       |
| 5 | Compound 1g | 22.766 | 108577 | 3894        | 12.07      |

|   | Peak Name   | RT     | Area  | Height (μV) | Resolution |
|---|-------------|--------|-------|-------------|------------|
| 6 | Compound 1n | 25.974 | 82741 | 2697        | 4.08       |

# Chloride\_Ethyl\_Precision 1

Reported by User: Roman Roxana (roman\_roxana)  
 Acquisition Server: Waters-cd3  
 Project Name: Teste\Thiazides  
 Sample Set Name: Seria Etil\_Cl 7 93 Accuracy  
 Code column: Inertsil ODS-3 250\*4.6 mm 5um LA140

## SAMPLE INFORMATION

|                   |                     |                     |                             |
|-------------------|---------------------|---------------------|-----------------------------|
| Sample Name:      | Solution 5.0 ug/ mL | Date Acquired:      | 2/12/2023 12:41:19 AM EET   |
| Sample Type:      | Unknown             | Acq. Method Set:    | Seria Etil_Cl 7 93 Accuracy |
| Vial:             | 11                  | Date Processed:     | 4/19/2023 2:22:11 PM EEST   |
| Injection #:      | 1                   | Processing Method:  | Seria Etil_Cl 7 93 Accuracy |
| Injection Volume: | 10.00 ul            | Channel Name:       | Extract 275                 |
| Run Time:         | 35.0 Minutes        | Proc. Chnl. Descr.: | 2998 PDA 275.0 nm (2998)    |
| Acquired By:      | roman_roxana        |                     |                             |

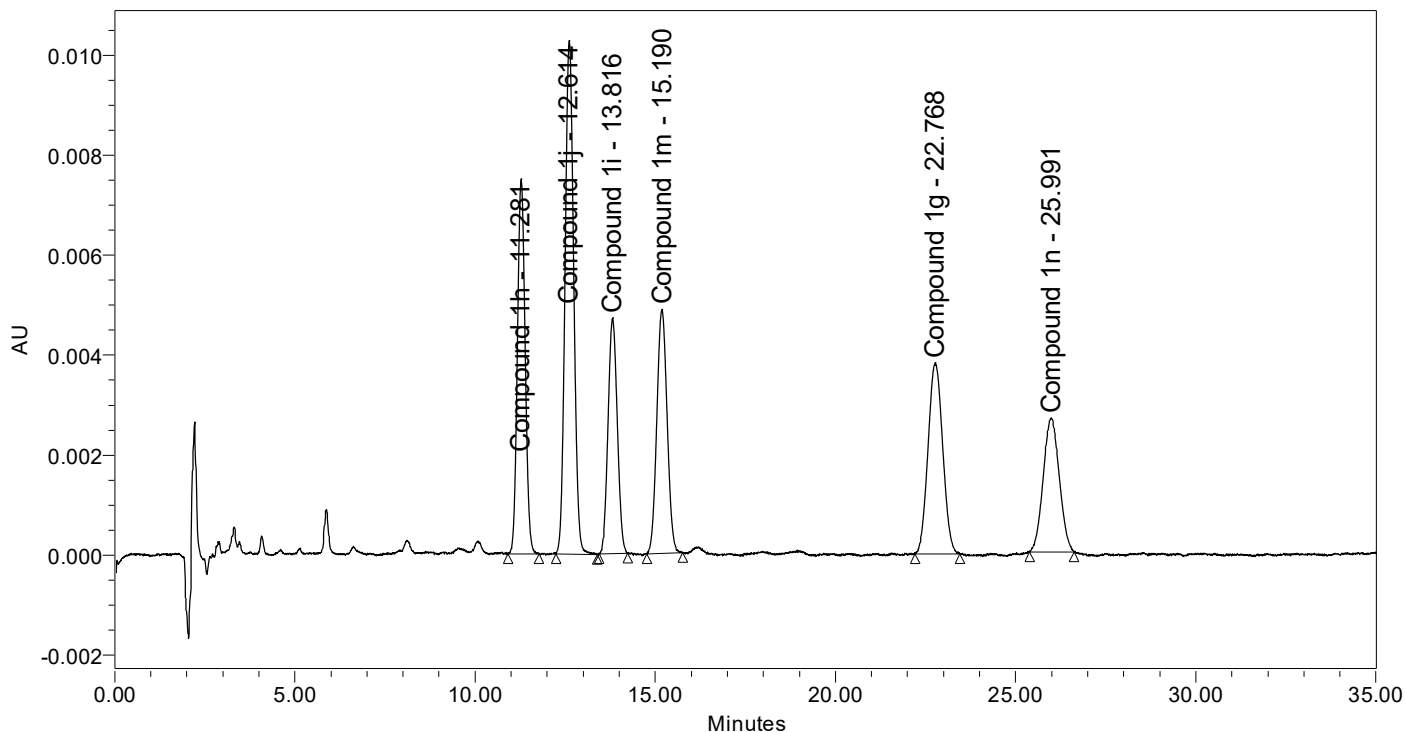

|   | Peak Name   | RT     | Area   | Height (μV) | Resolution |
|---|-------------|--------|--------|-------------|------------|
| 1 | Compound 1h | 11.281 | 110663 | 7501        |            |
| 2 | Compound 1j | 12.614 | 168785 | 10270       | 3.24       |
| 3 | Compound 1i | 13.816 | 82849  | 4720        | 2.67       |
| 4 | Compound 1m | 15.190 | 95668  | 4879        | 2.78       |
| 5 | Compound 1g | 22.768 | 107246 | 3831        | 12.02      |

|   | Peak Name   | RT     | Area  | Height (μV) | Resolution |
|---|-------------|--------|-------|-------------|------------|
| 6 | Compound 1n | 25.991 | 83968 | 2673        | 4.05       |

# Chloride\_Ethyl\_Precision 1

Reported by User: Roman Roxana (roman\_roxana)  
 Acquisition Server: Waters-cd3  
 Project Name: Teste\Thiazides  
 Sample Set Name: Seria Etil\_CI 7 93 Accuracy  
 Code column: Inertsil ODS-3 250\*4.6 mm 5um LA140

## SAMPLE INFORMATION

|                   |                     |                     |                             |
|-------------------|---------------------|---------------------|-----------------------------|
| Sample Name:      | Solution 5.0 ug/ mL | Date Acquired:      | 2/12/2023 1:17:02 AM EET    |
| Sample Type:      | Unknown             | Acq. Method Set:    | Seria Etil_CI 7 93 Accuracy |
| Vial:             | 12                  | Date Processed:     | 4/19/2023 2:23:16 PM EEST   |
| Injection #:      | 1                   | Processing Method:  | Seria Etil_CI 7 93 Accuracy |
| Injection Volume: | 10.00 ul            | Channel Name:       | Extract 275                 |
| Run Time:         | 35.0 Minutes        | Proc. Chnl. Descr.: | 2998 PDA 275.0 nm (2998)    |
| Acquired By:      | roman_roxana        |                     |                             |

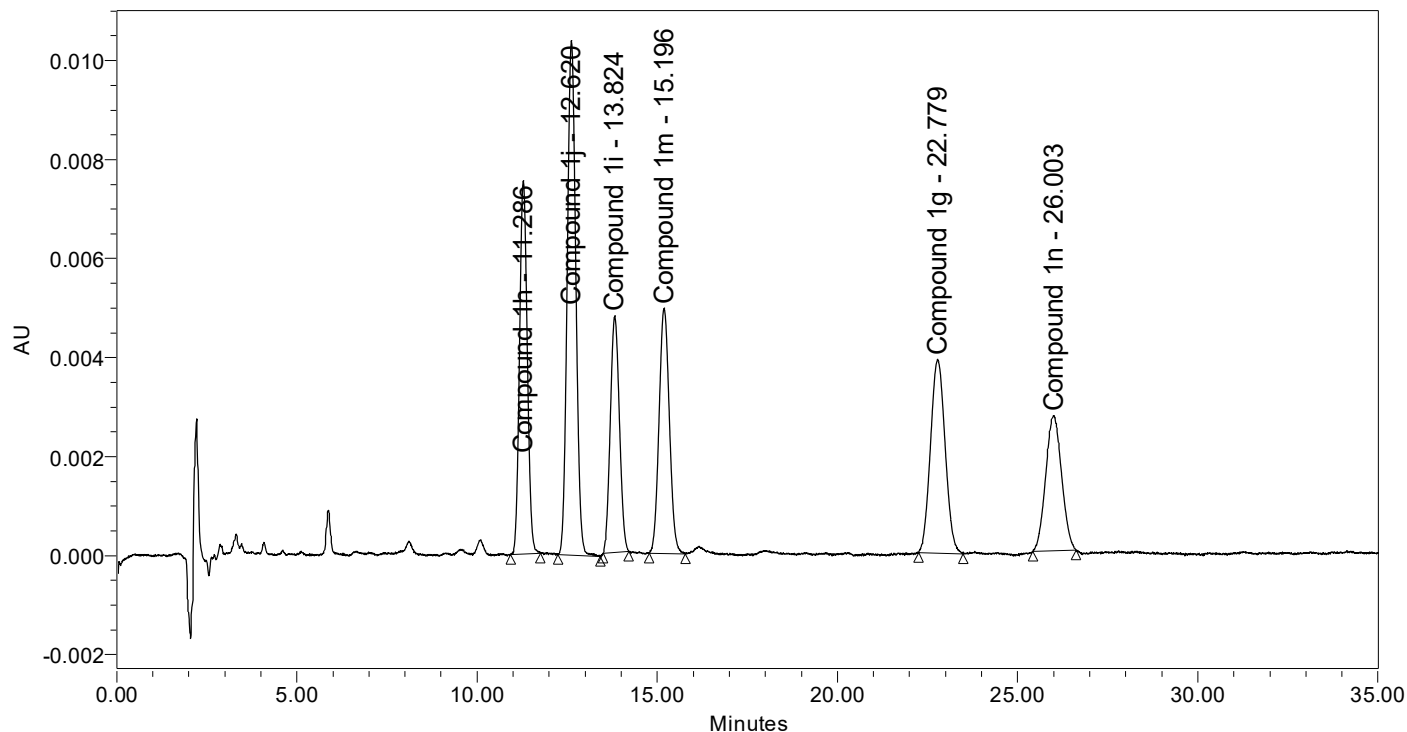

|   | Peak Name   | RT     | Area   | Height (μV) | Resolution |
|---|-------------|--------|--------|-------------|------------|
| 1 | Compound 1h | 11.286 | 110997 | 7538        |            |
| 2 | Compound 1j | 12.620 | 169796 | 10394       | 3.25       |
| 3 | Compound 1i | 13.824 | 82632  | 4775        | 2.69       |
| 4 | Compound 1m | 15.196 | 97012  | 4948        | 2.80       |
| 5 | Compound 1g | 22.779 | 108996 | 3908        | 12.07      |

|   | Peak Name   | RT     | Area  | Height (μV) | Resolution |
|---|-------------|--------|-------|-------------|------------|
| 6 | Compound 1n | 26.003 | 84959 | 2724        | 4.08       |

# Chloride\_Ethyl\_Precision 1

Reported by User: Roman Roxana (roman\_roxana)  
 Acquisition Server: Waters-cd3  
 Project Name: Teste\Thiazides  
 Sample Set Name: Seria Etil\_Cl 7 93 Accuracy  
 Code column: Inertsil ODS-3 250\*4.6 mm 5um LA140

## SAMPLE INFORMATION

|                   |                     |                     |                             |
|-------------------|---------------------|---------------------|-----------------------------|
| Sample Name:      | Solution 5.0 ug/ mL | Date Acquired:      | 2/12/2023 1:52:42 AM EET    |
| Sample Type:      | Unknown             | Acq. Method Set:    | Seria Etil_Cl 7 93 Accuracy |
| Vial:             | 13                  | Date Processed:     | 4/19/2023 2:23:44 PM EEST   |
| Injection #:      | 1                   | Processing Method:  | Seria Etil_Cl 7 93 Accuracy |
| Injection Volume: | 10.00 ul            | Channel Name:       | Extract 275                 |
| Run Time:         | 35.0 Minutes        | Proc. Chnl. Descr.: | 2998 PDA 275.0 nm (2998)    |
| Acquired By:      | roman_roxana        |                     |                             |

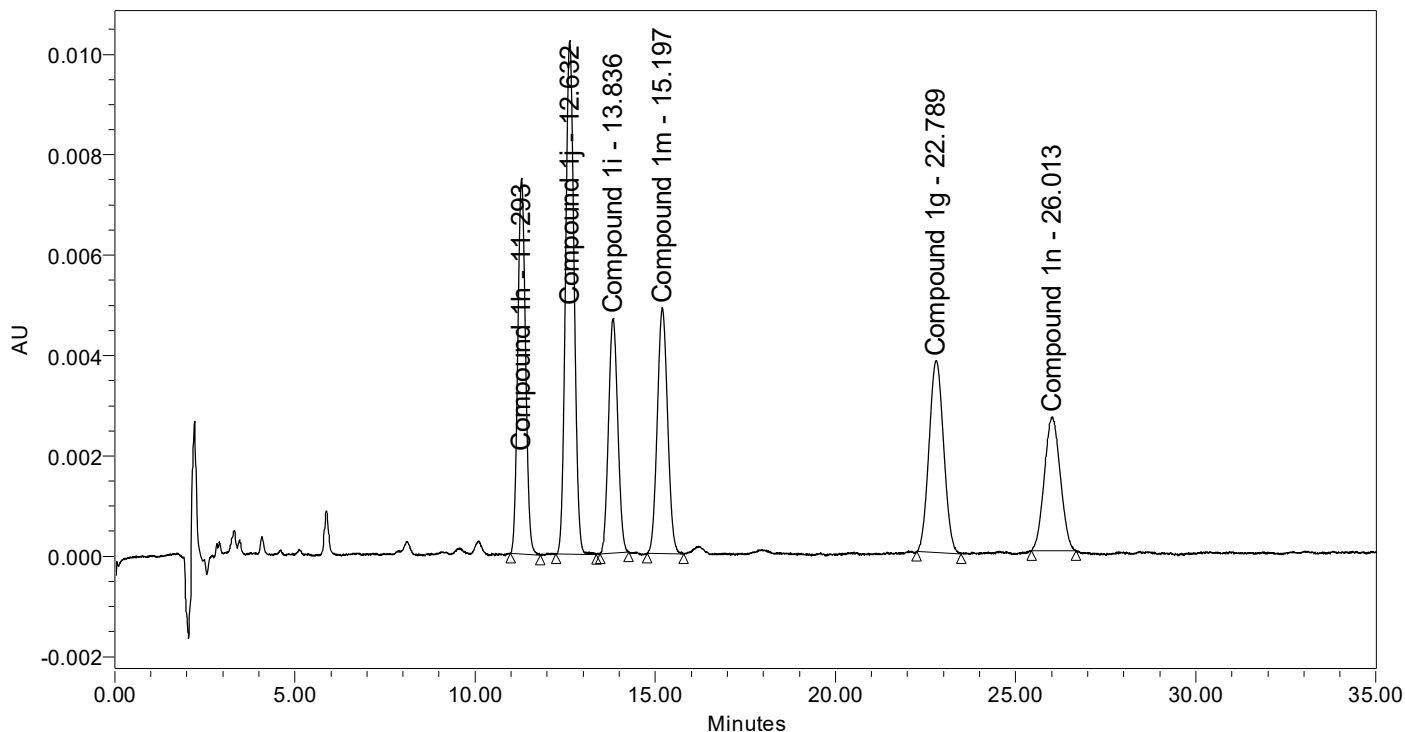

|   | Peak Name   | RT     | Area   | Height (μV) | Resolution |
|---|-------------|--------|--------|-------------|------------|
| 1 | Compound 1h | 11.293 | 110417 | 7486        |            |
| 2 | Compound 1j | 12.632 | 166835 | 10236       | 3.26       |
| 3 | Compound 1i | 13.836 | 82261  | 4679        | 2.68       |
| 4 | Compound 1m | 15.197 | 96243  | 4902        | 2.76       |
| 5 | Compound 1g | 22.789 | 106276 | 3822        | 12.03      |

|   | Peak Name   | RT     | Area  | Height (μV) | Resolution |
|---|-------------|--------|-------|-------------|------------|
| 6 | Compound 1n | 26.013 | 83531 | 2673        | 4.06       |

## Component Summary Area Time

Reported by User: Roman Roxana (roman\_roxana)

Acquisition Server: Waters-cd3

Project Name: Teste\Thiazides

Sample Set Name: Seria Etil\_CI 7 93 Accuracy

Code column: Inertsil ODS-3 250\*4.6 mm 5 um LA140

### Retention Time Summarized by Name Channel: 2998

|           | SampleName          | Inj | Channel | Vial | Compound 1h | Compound 1j | Compound 1i | Compound 1m |
|-----------|---------------------|-----|---------|------|-------------|-------------|-------------|-------------|
| 1         | Solution 5.0 ug/ mL | 1   | 2998    | 8    | 11.270      | 12.596      | 13.789      | 15.167      |
| 2         | Solution 5.0 ug/ mL | 1   | 2998    | 9    | 11.272      | 12.602      | 13.801      | 15.168      |
| 3         | Solution 5.0 ug/ mL | 1   | 2998    | 10   | 11.276      | 12.612      | 13.818      | 15.178      |
| 4         | Solution 5.0 ug/ mL | 1   | 2998    | 11   | 11.281      | 12.614      | 13.816      | 15.190      |
| 5         | Solution 5.0 ug/ mL | 1   | 2998    | 12   | 11.286      | 12.620      | 13.824      | 15.196      |
| 6         | Solution 5.0 ug/ mL | 1   | 2998    | 13   | 11.293      | 12.632      | 13.836      | 15.197      |
| Mean      |                     |     |         |      | 11.280      | 12.613      | 13.814      | 15.183      |
| Std. Dev. |                     |     |         |      | 0.009       | 0.013       | 0.017       | 0.014       |
| % RSD     |                     |     |         |      | 0.08        | 0.10        | 0.12        | 0.09        |

### Retention Time Summarized by Name Channel: 2998

|           | Compound 1g | Compound 1n |
|-----------|-------------|-------------|
| 1         | 22.721      | 25.932      |
| 2         | 22.742      | 25.950      |
| 3         | 22.766      | 25.974      |
| 4         | 22.768      | 25.991      |
| 5         | 22.779      | 26.003      |
| 6         | 22.789      | 26.013      |
| Mean      | 22.761      | 25.977      |
| Std. Dev. | 0.025       | 0.031       |
| % RSD     | 0.11        | 0.12        |



## Component Summary Area Time

Reported by User: Roman Roxana (roman\_roxana)

Acquisition Server: Waters-cd3

Project Name: Teste\Thiazides

Sample Set Name: Seria Etil\_Cl 7 93 Accuracy

Code column: Inertsil ODS-3 250\*4.6 mm 5 um LA140

### Area Summarized by Name Channel: 2998

|           | SampleName          | Inj | Channel | Vial | Compound 1h | Compound 1j | Compound 1i | Compound 1m |
|-----------|---------------------|-----|---------|------|-------------|-------------|-------------|-------------|
| 1         | Solution 5.0 ug/ mL | 1   | 2998    | 8    | 111591      | 169135      | 82009       | 97170       |
| 2         | Solution 5.0 ug/ mL | 1   | 2998    | 9    | 111110      | 168465      | 82735       | 96179       |
| 3         | Solution 5.0 ug/ mL | 1   | 2998    | 10   | 111024      | 168231      | 82661       | 96381       |
| 4         | Solution 5.0 ug/ mL | 1   | 2998    | 11   | 110663      | 168785      | 82849       | 95668       |
| 5         | Solution 5.0 ug/ mL | 1   | 2998    | 12   | 110997      | 169796      | 82632       | 97012       |
| 6         | Solution 5.0 ug/ mL | 1   | 2998    | 13   | 110417      | 166835      | 82261       | 96243       |
| Mean      |                     |     |         |      | 110967      | 168541      | 82525       | 96442       |
| Std. Dev. |                     |     |         |      | 402         | 1000        | 321         | 560         |
| % RSD     |                     |     |         |      | 0.36        | 0.59        | 0.39        | 0.58        |

### Area Summarized by Name Channel: 2998

|           | Compound 1g | Compound 1n |
|-----------|-------------|-------------|
| 1         | 108491      | 84215       |
| 2         | 109245      | 84630       |
| 3         | 108577      | 82741       |
| 4         | 107246      | 83968       |
| 5         | 108996      | 84959       |
| 6         | 106276      | 83531       |
| Mean      | 108138      | 84007       |
| Std. Dev. | 1144        | 796         |
| % RSD     | 1.06        | 0.95        |

**Quantitative determination of**  
***compounds 1g, 1h, 1i, 1j, 1m, 1n***  
**- Validation of the analytical method -**

Validation parameters:

- Specificity
- Precision 1
- **Precision 2**
- LOD – LOQ
- Linearity
- Range
- Accuracy
- Robustness

## Chloride\_Ethyl\_Precision 2

Reported by User: Roman Roxana (roman\_roxana)  
 Acquisition Server: Waters-cd3  
 Project Name: Teste\Thiazides  
 Sample Set Name: Seria Etil\_Cl 7 93 Precision 2  
 Code column: Inertsil ODS-3 250\*4.6 mm 5um LA140

### SAMPLE INFORMATION

|                   |                     |                     |                                |
|-------------------|---------------------|---------------------|--------------------------------|
| Sample Name:      | Solution 5.0 ug/ mL | Date Acquired:      | 2/13/2023 6:08:21 AM EET       |
| Sample Type:      | Unknown             | Acq. Method Set:    | Seria Etil_Cl 7 93 Precision 2 |
| Vial:             | 1                   | Date Processed:     | 4/10/2023 1:38:56 PM EEST      |
| Injection #:      | 1                   | Processing Method:  | Seria Etil_Cl 7 93 Precision 2 |
| Injection Volume: | 10.00 ul            | Channel Name:       | Extract 275                    |
| Run Time:         | 35.0 Minutes        | Proc. Chnl. Descr.: | 2998 PDA 275.0 nm (2998)       |
| Acquired By:      | roman_roxana        |                     |                                |

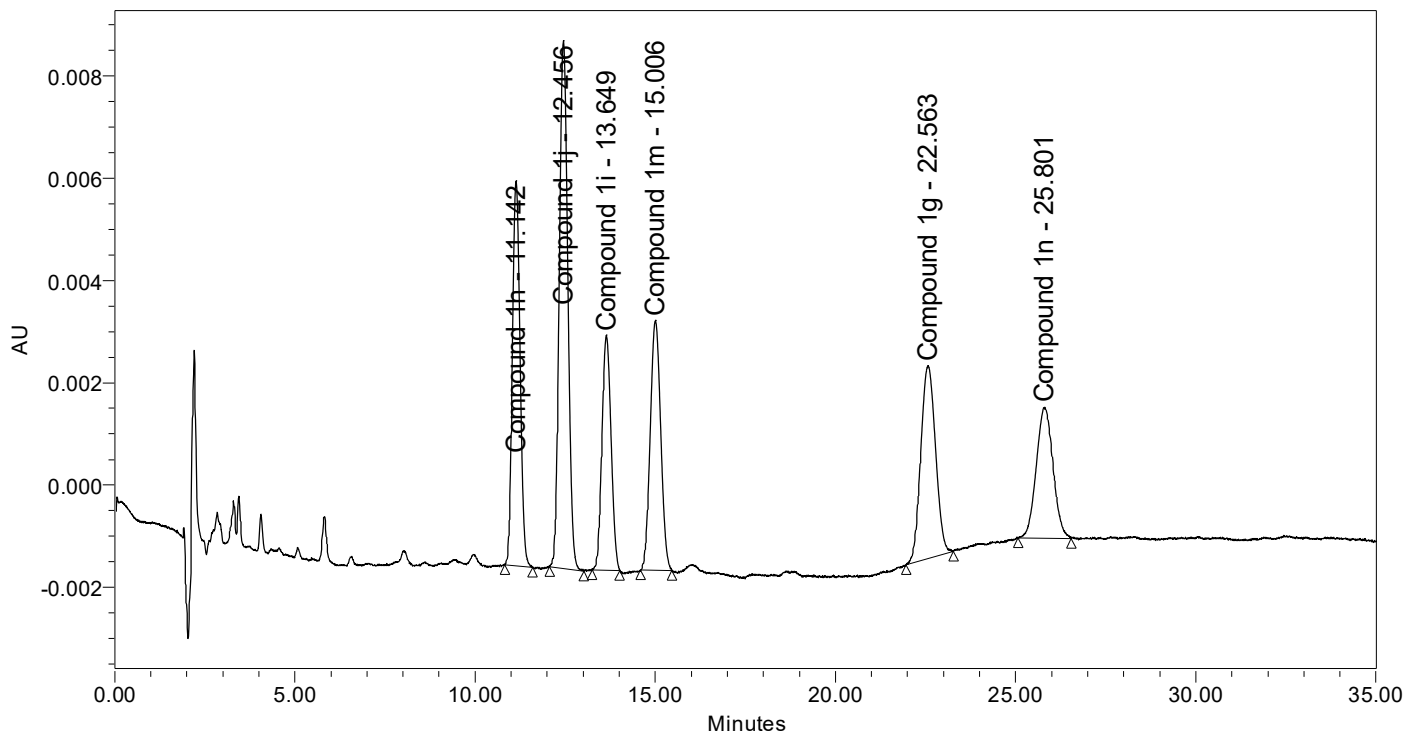

|   | Peak Name   | RT     | Area   | Height (μV) | Resolution |
|---|-------------|--------|--------|-------------|------------|
| 1 | Compound 1h | 11.142 | 110842 | 7539        |            |
| 2 | Compound 1j | 12.456 | 168780 | 10321       | 3.19       |
| 3 | Compound 1i | 13.649 | 80744  | 4594        | 2.64       |
| 4 | Compound 1m | 15.006 | 97663  | 4889        | 2.71       |
| 5 | Compound 1g | 22.563 | 106865 | 3776        | 11.76      |

|   | Peak Name   | RT     | Area  | Height (μV) | Resolution |
|---|-------------|--------|-------|-------------|------------|
| 6 | Compound 1n | 25.801 | 83077 | 2559        | 4.01       |

## Chloride\_Ethyl\_Precision 2

Reported by User: Roman Roxana (roman\_roxana)  
 Acquisition Server: Waters-cd3  
 Project Name: Teste\Thiazides  
 Sample Set Name: Seria Etil\_Cl 7 93 Precision 2  
 Code column: Inertsil ODS-3 250\*4.6 mm 5um LA140

### SAMPLE INFORMATION

|                   |                     |                     |                                |
|-------------------|---------------------|---------------------|--------------------------------|
| Sample Name:      | Solution 5.0 ug/ mL | Date Acquired:      | 2/13/2023 6:44:03 AM EET       |
| Sample Type:      | Unknown             | Acq. Method Set:    | Seria Etil_Cl 7 93 Precision 2 |
| Vial:             | 2                   | Date Processed:     | 4/10/2023 1:33:54 PM EEST      |
| Injection #:      | 1                   | Processing Method:  | Seria Etil_Cl 7 93 Precision 2 |
| Injection Volume: | 10.00 ul            | Channel Name:       | Extract 275                    |
| Run Time:         | 35.0 Minutes        | Proc. Chnl. Descr.: | 2998 PDA 275.0 nm (2998)       |
| Acquired By:      | roman_roxana        |                     |                                |

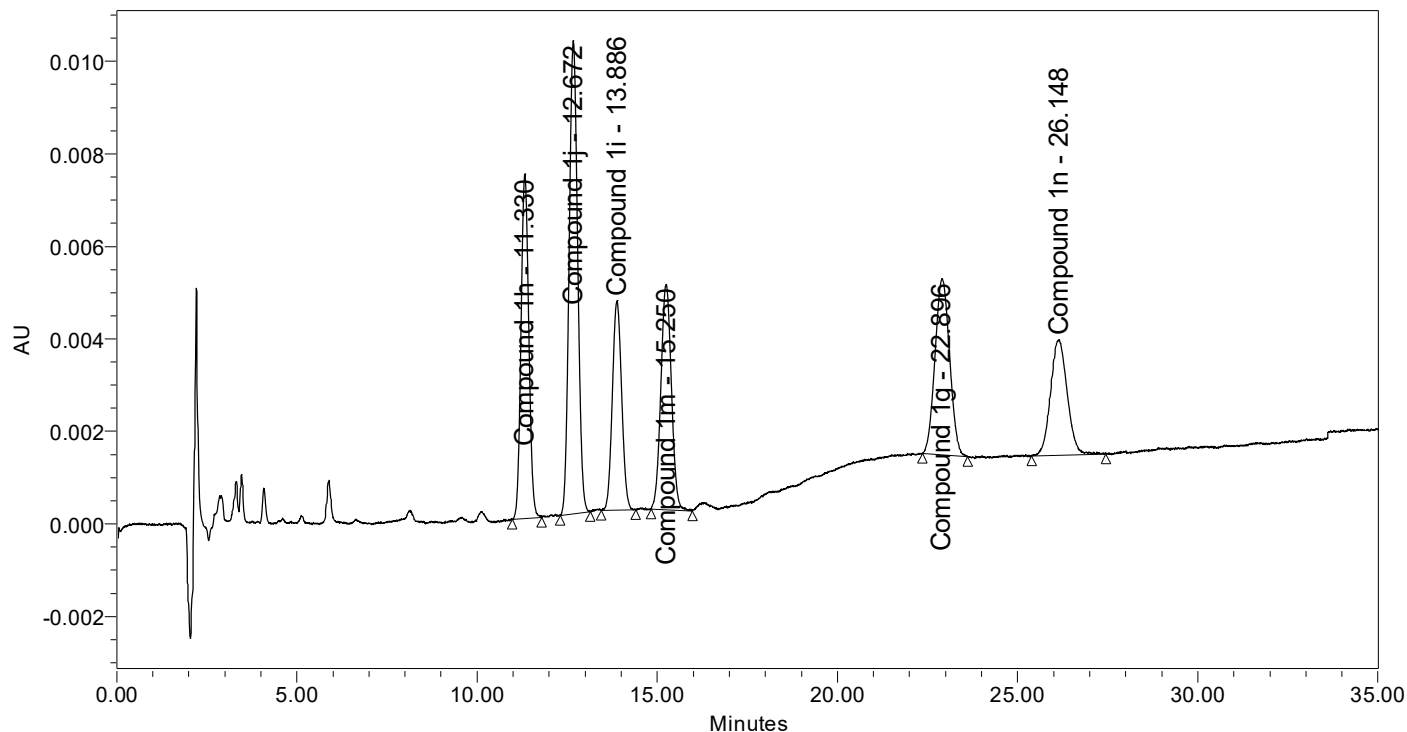

|   | Peak Name   | RT     | Area   | Height (μV) | Resolution |
|---|-------------|--------|--------|-------------|------------|
| 1 | Compound 1h | 11.330 | 109970 | 7449        |            |
| 2 | Compound 1j | 12.672 | 166002 | 10235       | 3.28       |
| 3 | Compound 1i | 13.886 | 79884  | 4529        | 2.70       |
| 4 | Compound 1m | 15.250 | 97797  | 4877        | 2.74       |
| 5 | Compound 1g | 22.896 | 106337 | 3808        | 12.01      |

|   | Peak Name   | RT     | Area  | Height (μV) | Resolution |
|---|-------------|--------|-------|-------------|------------|
| 6 | Compound 1n | 26.148 | 81794 | 2506        | 4.08       |

## Chloride\_Ethyl\_Precision 2

Reported by User: Roman Roxana (roman\_roxana)  
 Acquisition Server: Waters-cd3  
 Project Name: Teste\Thiazides  
 Sample Set Name: Seria Etil\_Cl 7 93 Precision 2  
 Code column: Inertsil ODS-3 250\*4.6 mm 5um LA140

### SAMPLE INFORMATION

|                   |                     |                     |                                |
|-------------------|---------------------|---------------------|--------------------------------|
| Sample Name:      | Solution 5.0 ug/ mL | Date Acquired:      | 2/13/2023 7:19:56 AM EET       |
| Sample Type:      | Unknown             | Acq. Method Set:    | Seria Etil_Cl 7 93 Precision 2 |
| Vial:             | 3                   | Date Processed:     | 4/10/2023 1:34:26 PM EEST      |
| Injection #:      | 1                   | Processing Method:  | Seria Etil_Cl 7 93 Precision 2 |
| Injection Volume: | 10.00 ul            | Channel Name:       | Extract 275                    |
| Run Time:         | 35.0 Minutes        | Proc. Chnl. Descr.: | 2998 PDA 275.0 nm (2998)       |
| Acquired By:      | roman_roxana        |                     |                                |

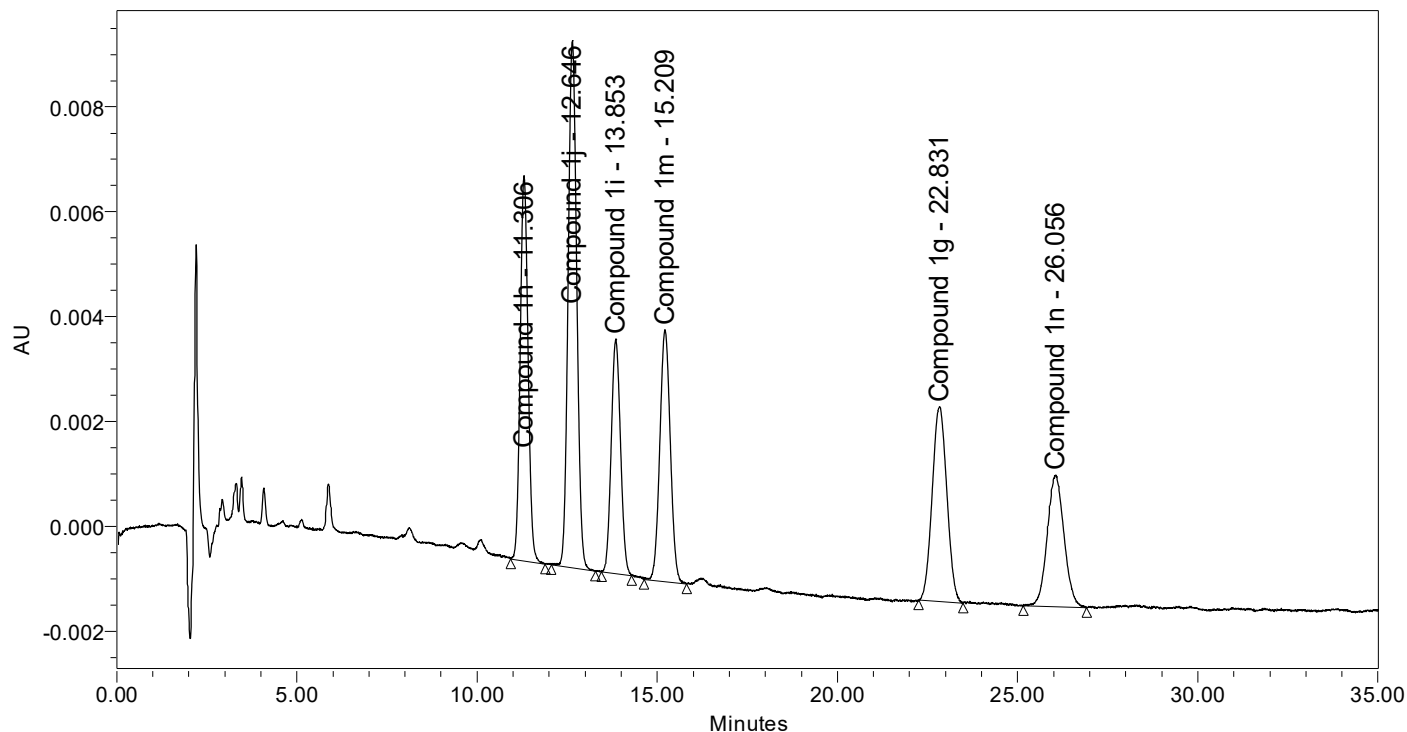

|   | Peak Name   | RT     | Area   | Height (μV) | Resolution |
|---|-------------|--------|--------|-------------|------------|
| 1 | Compound 1h | 11.306 | 109387 | 7344        |            |
| 2 | Compound 1j | 12.646 | 165117 | 10061       | 3.26       |
| 3 | Compound 1i | 13.853 | 79171  | 4474        | 2.68       |
| 4 | Compound 1m | 15.209 | 96058  | 4803        | 2.72       |
| 5 | Compound 1g | 22.831 | 104014 | 3717        | 11.97      |

|   | Peak Name   | RT     | Area  | Height (μV) | Resolution |
|---|-------------|--------|-------|-------------|------------|
| 6 | Compound 1n | 26.056 | 82753 | 2513        | 4.01       |

## Chloride\_Ethyl\_Precision 2

Reported by User: Roman Roxana (roman\_roxana)  
 Acquisition Server: Waters-cd3  
 Project Name: Teste\Thiazides  
 Sample Set Name: Seria Etil\_Cl 7 93 Precision 2  
 Code column: Inertsil ODS-3 250\*4.6 mm 5um LA140

### SAMPLE INFORMATION

|                   |                     |                     |                                |
|-------------------|---------------------|---------------------|--------------------------------|
| Sample Name:      | Solution 5.0 ug/ mL | Date Acquired:      | 2/13/2023 7:55:39 AM EET       |
| Sample Type:      | Unknown             | Acq. Method Set:    | Seria Etil_Cl 7 93 Precision 2 |
| Vial:             | 4                   | Date Processed:     | 4/10/2023 1:49:56 PM EEST      |
| Injection #:      | 1                   | Processing Method:  | Seria Etil_Cl 7 93 Precision 2 |
| Injection Volume: | 10.00 ul            | Channel Name:       | Extract 275                    |
| Run Time:         | 35.0 Minutes        | Proc. Chnl. Descr.: | 2998 PDA 275.0 nm (2998)       |
| Acquired By:      | roman_roxana        |                     |                                |

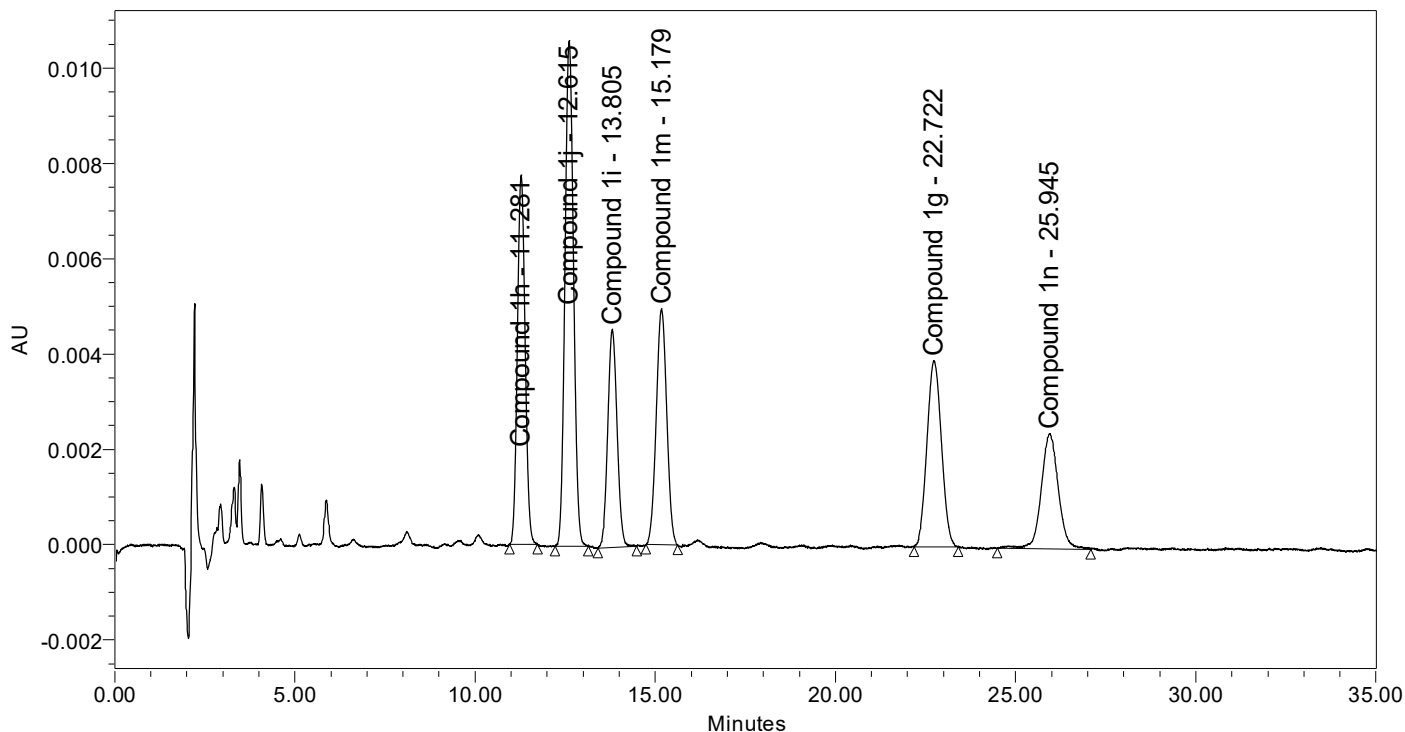

|   | Peak Name   | RT     | Area   | Height (μV) | Resolution |
|---|-------------|--------|--------|-------------|------------|
| 1 | Compound 1h | 11.281 | 114244 | 7758        |            |
| 2 | Compound 1j | 12.615 | 172220 | 10613       | 3.26       |
| 3 | Compound 1i | 13.805 | 81127  | 4570        | 2.65       |
| 4 | Compound 1m | 15.179 | 98678  | 4944        | 2.75       |
| 5 | Compound 1g | 22.722 | 108103 | 3909        | 11.86      |

|   | Peak Name   | RT     | Area  | Height (μV) | Resolution |
|---|-------------|--------|-------|-------------|------------|
| 6 | Compound 1n | 25.945 | 80985 | 2417        | 4.04       |

## Chloride\_Ethyl\_Precision 2

Reported by User: Roman Roxana (roman\_roxana)  
 Acquisition Server: Waters-cd3  
 Project Name: Teste\Thiazides  
 Sample Set Name: Seria Etil\_CI 7 93 Precision 2  
 Code column: Inertsil ODS-3 250\*4.6 mm 5um LA140

### SAMPLE INFORMATION

|                   |                     |                     |                                |
|-------------------|---------------------|---------------------|--------------------------------|
| Sample Name:      | Solution 5.0 ug/ mL | Date Acquired:      | 2/13/2023 8:31:33 AM EET       |
| Sample Type:      | Unknown             | Acq. Method Set:    | Seria Etil_CI 7 93 Precision 2 |
| Vial:             | 5                   | Date Processed:     | 4/10/2023 1:38:16 PM EEST      |
| Injection #:      | 1                   | Processing Method:  | Seria Etil_CI 7 93 Precision 2 |
| Injection Volume: | 10.00 ul            | Channel Name:       | Extract 275                    |
| Run Time:         | 35.0 Minutes        | Proc. Chnl. Descr.: | 2998 PDA 275.0 nm (2998)       |
| Acquired By:      | roman_roxana        |                     |                                |

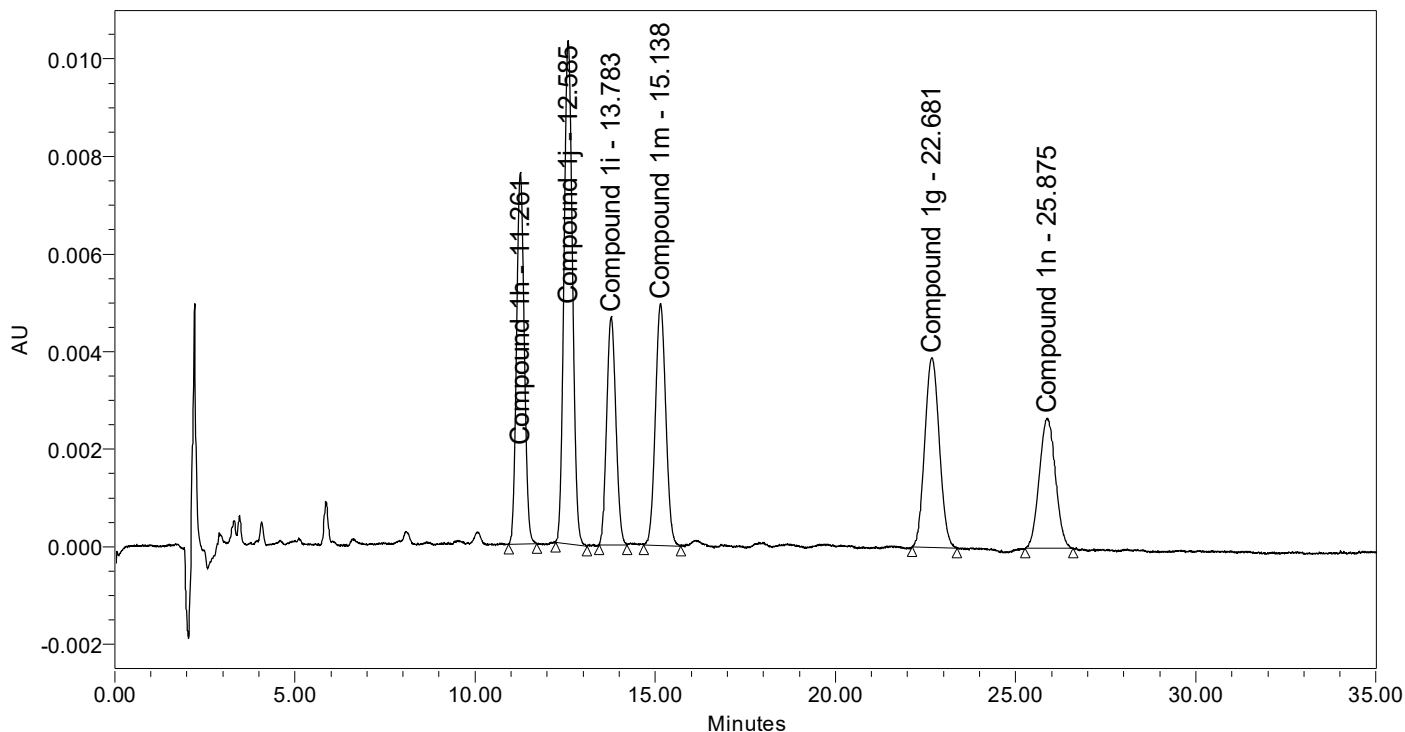

|   | Peak Name   | RT     | Area   | Height (μV) | Resolution |
|---|-------------|--------|--------|-------------|------------|
| 1 | Compound 1h | 11.261 | 111967 | 7620        |            |
| 2 | Compound 1j | 12.585 | 166791 | 10317       | 3.25       |
| 3 | Compound 1i | 13.783 | 82099  | 4682        | 2.68       |
| 4 | Compound 1m | 15.138 | 98075  | 4962        | 2.75       |
| 5 | Compound 1g | 22.681 | 108183 | 3889        | 11.98      |

|   | Peak Name   | RT     | Area  | Height (μV) | Resolution |
|---|-------------|--------|-------|-------------|------------|
| 6 | Compound 1n | 25.875 | 84121 | 2671        | 4.03       |

## Chloride\_Ethyl\_Precision 2

Reported by User: Roman Roxana (roman\_roxana)  
 Acquisition Server: Waters-cd3  
 Project Name: Teste\Thiazides  
 Sample Set Name: Seria Etil\_Cl 7 93 Precision 2  
 Code column: Inertsil ODS-3 250\*4.6 mm 5um LA140

### SAMPLE INFORMATION

|                   |                     |                     |                                |
|-------------------|---------------------|---------------------|--------------------------------|
| Sample Name:      | Solution 5.0 ug/ mL | Date Acquired:      | 2/13/2023 9:07:12 AM EET       |
| Sample Type:      | Unknown             | Acq. Method Set:    | Seria Etil_Cl 7 93 Precision 2 |
| Vial:             | 6                   | Date Processed:     | 4/10/2023 1:40:21 PM EEST      |
| Injection #:      | 1                   | Processing Method:  | Seria Etil_Cl 7 93 Precision 2 |
| Injection Volume: | 10.00 ul            | Channel Name:       | Extract 275                    |
| Run Time:         | 35.0 Minutes        | Proc. Chnl. Descr.: | 2998 PDA 275.0 nm (2998)       |
| Acquired By:      | roman_roxana        |                     |                                |

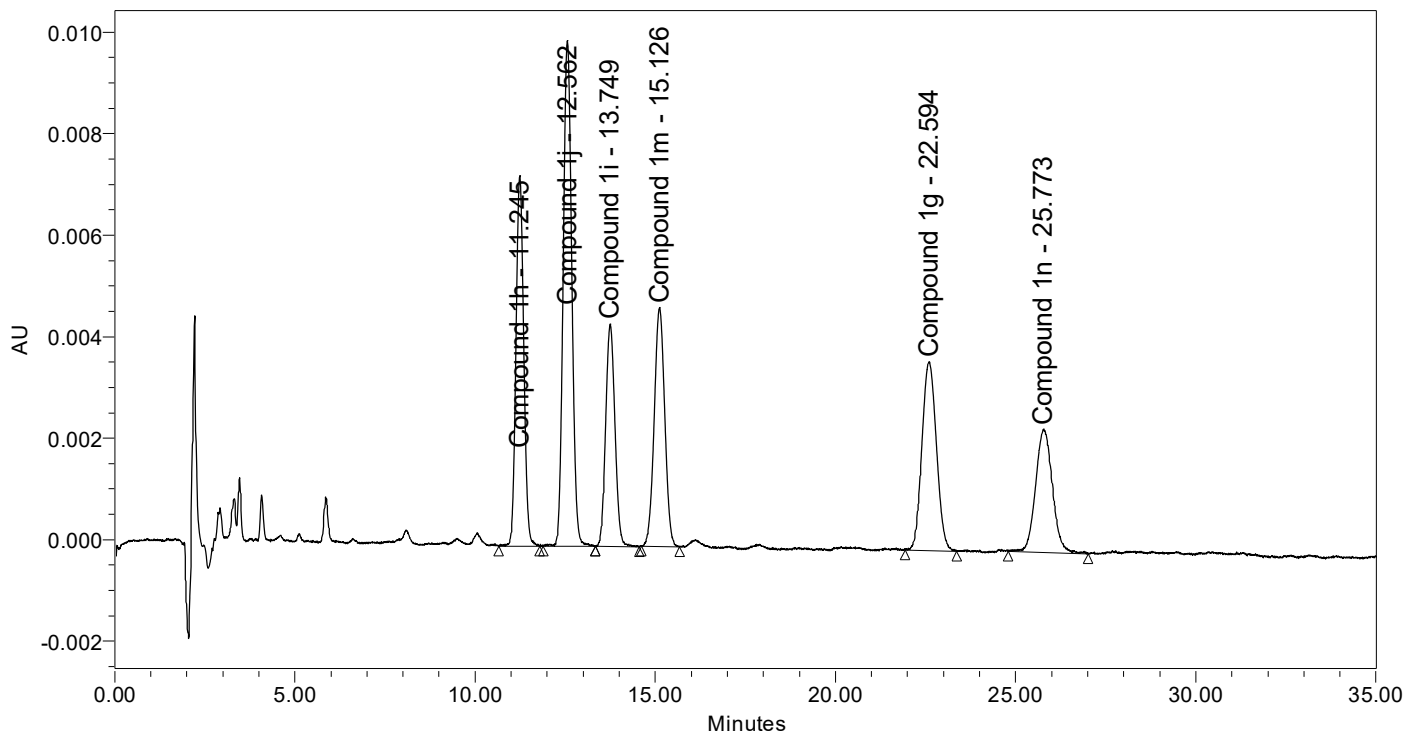

|   | Peak Name   | RT     | Area   | Height (μV) | Resolution |
|---|-------------|--------|--------|-------------|------------|
| 1 | Compound 1h | 11.245 | 108129 | 7304        |            |
| 2 | Compound 1j | 12.562 | 163043 | 9968        | 3.23       |
| 3 | Compound 1i | 13.749 | 77962  | 4390        | 2.65       |
| 4 | Compound 1m | 15.126 | 94606  | 4712        | 2.77       |
| 5 | Compound 1g | 22.594 | 103635 | 3726        | 11.81      |

|   | Peak Name   | RT     | Area  | Height (μV) | Resolution |
|---|-------------|--------|-------|-------------|------------|
| 6 | Compound 1n | 25.773 | 79668 | 2431        | 4.01       |



## Component Summary Area Time

Reported by User: Roman Roxana (roman\_roxana)  
 Acquisition Server: Waters-cd3  
 Project Name: Teste\Thiazides  
 Sample Set Name: Seria Etil\_CI 7 93 Precision 2  
 Code column: Inertsil ODS-3 250\*4.6 mm 5 um LA140

### Retention Time Summarized by Name Channel: 2998

|           | SampleName          | Inj | Channel | Vial | Compound 1h | Compound 1j | Compound 1i | Compound 1m |
|-----------|---------------------|-----|---------|------|-------------|-------------|-------------|-------------|
| 1         | Solution 5.0 ug/ mL | 1   | 2998    | 1    | 11.142      | 12.456      | 13.649      | 15.006      |
| 2         | Solution 5.0 ug/ mL | 1   | 2998    | 2    | 11.330      | 12.672      | 13.886      | 15.250      |
| 3         | Solution 5.0 ug/ mL | 1   | 2998    | 3    | 11.306      | 12.646      | 13.853      | 15.209      |
| 4         | Solution 5.0 ug/ mL | 1   | 2998    | 4    | 11.281      | 12.615      | 13.805      | 15.179      |
| 5         | Solution 5.0 ug/ mL | 1   | 2998    | 5    | 11.261      | 12.585      | 13.783      | 15.138      |
| 6         | Solution 5.0 ug/ mL | 1   | 2998    | 6    | 11.245      | 12.562      | 13.749      | 15.126      |
| Mean      |                     |     |         |      | 11.261      | 12.589      | 13.787      | 15.151      |
| Std. Dev. |                     |     |         |      | 0.066       | 0.076       | 0.084       | 0.085       |
| % RSD     |                     |     |         |      | 0.58        | 0.61        | 0.61        | 0.56        |

### Retention Time Summarized by Name Channel: 2998

|           | Compound 1g | Compound 1n |
|-----------|-------------|-------------|
| 1         | 22.563      | 25.801      |
| 2         | 22.896      | 26.148      |
| 3         | 22.831      | 26.056      |
| 4         | 22.722      | 25.945      |
| 5         | 22.681      | 25.875      |
| 6         | 22.594      | 25.773      |
| Mean      | 22.714      | 25.933      |
| Std. Dev. | 0.131       | 0.147       |
| % RSD     | 0.57        | 0.57        |

## Component Summary Area Time

Reported by User: Roman Roxana (roman\_roxana)  
 Acquisition Server: Waters-cd3  
 Project Name: Teste\Thiazides  
 Sample Set Name: Seria Etil\_CI 7 93 Precision 2  
 Code column: Inertsil ODS-3 250\*4.6 mm 5 um LA140

### Area Summarized by Name Channel: 2998

|           | SampleName          | Inj | Channel | Vial | Compound 1h | Compound 1j | Compound 1i | Compound 1m |
|-----------|---------------------|-----|---------|------|-------------|-------------|-------------|-------------|
| 1         | Solution 5.0 ug/ mL | 1   | 2998    | 1    | 110842      | 168780      | 80744       | 97663       |
| 2         | Solution 5.0 ug/ mL | 1   | 2998    | 2    | 109970      | 166002      | 79884       | 97797       |
| 3         | Solution 5.0 ug/ mL | 1   | 2998    | 3    | 109387      | 165117      | 79171       | 96058       |
| 4         | Solution 5.0 ug/ mL | 1   | 2998    | 4    | 114244      | 172220      | 81127       | 98678       |
| 5         | Solution 5.0 ug/ mL | 1   | 2998    | 5    | 111967      | 166791      | 82099       | 98075       |
| 6         | Solution 5.0 ug/ mL | 1   | 2998    | 6    | 108129      | 163043      | 77962       | 94606       |
| Mean      |                     |     |         |      | 110757      | 166992      | 80164       | 97146       |
| Std. Dev. |                     |     |         |      | 2147        | 3183        | 1478        | 1519        |
| % RSD     |                     |     |         |      | 1.94        | 1.91        | 1.84        | 1.56        |

### Area Summarized by Name Channel: 2998

|           | Compound 1g | Compound 1n |
|-----------|-------------|-------------|
| 1         | 106865      | 83077       |
| 2         | 106337      | 81794       |
| 3         | 104014      | 82753       |
| 4         | 108103      | 80985       |
| 5         | 108183      | 84121       |
| 6         | 103635      | 79668       |
| Mean      | 106189      | 82066       |
| Std. Dev. | 1968        | 1594        |
| % RSD     | 1.85        | 1.94        |

## Component Summary Area Time

Reported by User: Roman Roxana (roman\_roxana)  
 Acquisition Server: Waters-cd3  
 Project Name: Teste\Thiazides  
 Sample Set Name: Seria Etil\_CI 7 93 Precision 2, Seria Etil\_CI 7 93 Accuracy  
 Code column: Inertsil ODS-3 250\*4.6 mm 5 um LA140

### Retention Time Summarized by Name Channel: 2998

|           | SampleName          | Inj | Channel | Vial | Compound 1h | Compound 1j | Compound 1i | Compound 1m |
|-----------|---------------------|-----|---------|------|-------------|-------------|-------------|-------------|
| 1         | Solution 5.0 ug/ mL | 1   | 2998    | 8    | 11.270      | 12.596      | 13.789      | 15.167      |
| 2         | Solution 5.0 ug/ mL | 1   | 2998    | 9    | 11.272      | 12.602      | 13.801      | 15.168      |
| 3         | Solution 5.0 ug/ mL | 1   | 2998    | 10   | 11.276      | 12.612      | 13.818      | 15.178      |
| 4         | Solution 5.0 ug/ mL | 1   | 2998    | 11   | 11.281      | 12.614      | 13.816      | 15.190      |
| 5         | Solution 5.0 ug/ mL | 1   | 2998    | 12   | 11.286      | 12.620      | 13.824      | 15.196      |
| 6         | Solution 5.0 ug/ mL | 1   | 2998    | 13   | 11.293      | 12.632      | 13.836      | 15.197      |
| 7         | Solution 5.0 ug/ mL | 1   | 2998    | 1    | 11.142      | 12.456      | 13.649      | 15.006      |
| 8         | Solution 5.0 ug/ mL | 1   | 2998    | 2    | 11.330      | 12.672      | 13.886      | 15.250      |
| 9         | Solution 5.0 ug/ mL | 1   | 2998    | 3    | 11.306      | 12.646      | 13.853      | 15.209      |
| 10        | Solution 5.0 ug/ mL | 1   | 2998    | 4    | 11.281      | 12.615      | 13.805      | 15.179      |
| 11        | Solution 5.0 ug/ mL | 1   | 2998    | 5    | 11.261      | 12.585      | 13.783      | 15.138      |
| 12        | Solution 5.0 ug/ mL | 1   | 2998    | 6    | 11.245      | 12.562      | 13.749      | 15.126      |
| Mean      |                     |     |         |      | 11.270      | 12.601      | 13.801      | 15.167      |
| Std. Dev. |                     |     |         |      | 0.046       | 0.054       | 0.059       | 0.060       |
| % RSD     |                     |     |         |      | 0.40        | 0.43        | 0.43        | 0.40        |

### Retention Time Summarized by Name Channel: 2998

|   | Compound 1g | Compound 1n |           | Compound 1g | Compound 1n |
|---|-------------|-------------|-----------|-------------|-------------|
| 1 | 22.721      | 25.932      | 10        | 22.722      | 25.945      |
| 2 | 22.742      | 25.950      | 11        | 22.681      | 25.875      |
| 3 | 22.766      | 25.974      | 12        | 22.594      | 25.773      |
| 4 | 22.768      | 25.991      | Mean      | 22.738      | 25.955      |
| 5 | 22.779      | 26.003      | Std. Dev. | 0.093       | 0.104       |
| 6 | 22.789      | 26.013      | % RSD     | 0.41        | 0.40        |
| 7 | 22.563      | 25.801      |           |             |             |
| 8 | 22.896      | 26.148      |           |             |             |
| 9 | 22.831      | 26.056      |           |             |             |

## Component Summary Area Time

Reported by User: Roman Roxana (roman\_roxana)  
 Acquisition Server: Waters-cd3  
 Project Name: Teste\Thiazides  
 Sample Set Name: Seria Etil\_CI 7 93 Precision 2, Seria Etil\_CI 7 93 Accuracy  
 Code column: Inertsil ODS-3 250\*4.6 mm 5 um LA140

### Area Summarized by Name Channel: 2998

|           | SampleName          | Inj | Channel | Vial | Compound 1h | Compound 1j | Compound 1i | Compound 1m |
|-----------|---------------------|-----|---------|------|-------------|-------------|-------------|-------------|
| 1         | Solution 5.0 ug/ mL | 1   | 2998    | 8    | 111591      | 169135      | 82009       | 97170       |
| 2         | Solution 5.0 ug/ mL | 1   | 2998    | 9    | 111110      | 168465      | 82735       | 96179       |
| 3         | Solution 5.0 ug/ mL | 1   | 2998    | 10   | 111024      | 168231      | 82661       | 96381       |
| 4         | Solution 5.0 ug/ mL | 1   | 2998    | 11   | 110663      | 168785      | 82849       | 95668       |
| 5         | Solution 5.0 ug/ mL | 1   | 2998    | 12   | 110997      | 169796      | 82632       | 97012       |
| 6         | Solution 5.0 ug/ mL | 1   | 2998    | 13   | 110417      | 166835      | 82261       | 96243       |
| 7         | Solution 5.0 ug/ mL | 1   | 2998    | 1    | 110842      | 168780      | 80744       | 97663       |
| 8         | Solution 5.0 ug/ mL | 1   | 2998    | 2    | 109970      | 166002      | 79884       | 97797       |
| 9         | Solution 5.0 ug/ mL | 1   | 2998    | 3    | 109387      | 165117      | 79171       | 96058       |
| 10        | Solution 5.0 ug/ mL | 1   | 2998    | 4    | 114244      | 172220      | 81127       | 98678       |
| 11        | Solution 5.0 ug/ mL | 1   | 2998    | 5    | 111967      | 166791      | 82099       | 98075       |
| 12        | Solution 5.0 ug/ mL | 1   | 2998    | 6    | 108129      | 163043      | 77962       | 94606       |
| Mean      |                     |     |         |      | 110862      | 167767      | 81345       | 96794       |
| Std. Dev. |                     |     |         |      | 1476        | 2390        | 1600        | 1152        |
| % RSD     |                     |     |         |      | 1.33        | 1.42        | 1.97        | 1.19        |

### Area Summarized by Name Channel: 2998

|   | Compound 1g | Compound 1n |           | Compound 1g | Compound 1n |
|---|-------------|-------------|-----------|-------------|-------------|
| 1 | 108491      | 84215       | 10        | 108103      | 80985       |
| 2 | 109245      | 84630       | 11        | 108183      | 84121       |
| 3 | 108577      | 82741       | 12        | 103635      | 79668       |
| 4 | 107246      | 83968       | Mean      | 107164      | 83037       |
| 5 | 108996      | 84959       | Std. Dev. | 1842        | 1572        |
| 6 | 106276      | 83531       | % RSD     | 1.72        | 1.89        |
| 7 | 106865      | 83077       |           |             |             |
| 8 | 106337      | 81794       |           |             |             |
| 9 | 104014      | 82753       |           |             |             |

**Quantitative determination of  
*compounds 1g, 1h, 1i, 1j, 1m, 1n***

**- Validation of the analytical method -**

Validation parameters:

- Specificity
- Precision 1
- Precision 2
- **LOD – LOQ**
- Linearity
- Range
- Accuracy
- Robustness

# Calibration Curve

Reported by User: Roman Roxana (roman\_roxana)  
 Acquisition Server: Waters-cd3  
 Project Name: Teste\Thiazides  
 Sample Set Name: Seria Etil\_CI 7 93 LOD LOQ  
 Code column: Inertsil ODS-3, 4,6\*250 mm, 5 um

Calibration Plot

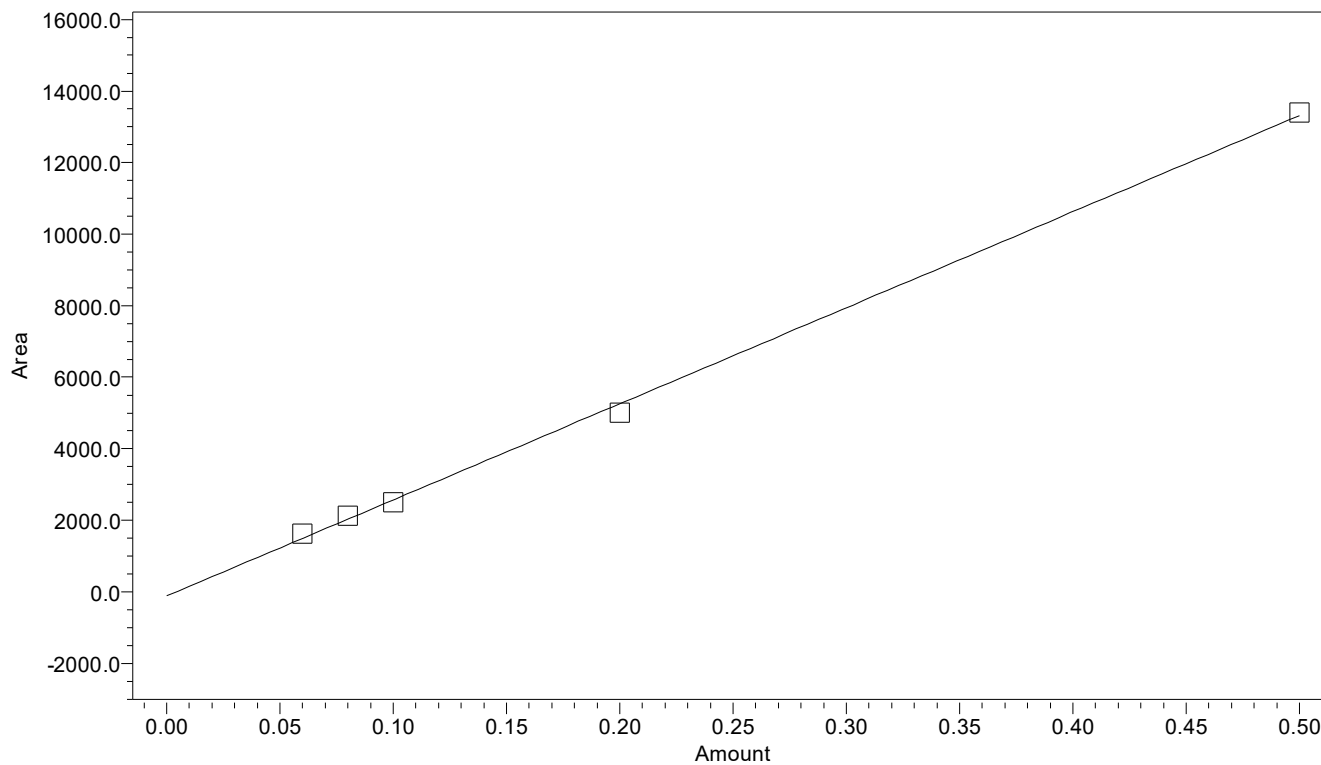

Name: Compound 1j; Processing Method: Seria Etil\_CI 7 93 LOD LOQ; Fit Type: Linear (1st Order);  
 Cal Curve Id: 3429; A: -1.175618e+002; B: 2.686268e+004; C: 0.000000e+000; D: 0.000000e+000;  
 R^2: 0.998949; Standard Error 1.836842e+002

## Calibration Curve

Reported by User: Roman Roxana (roman\_roxana)  
 Acquisition Server: Waters-cd3  
 Project Name: Teste\Thiazides  
 Sample Set Name: Seria Etil\_Cl 7 93 LOD LOQ  
 Code column: Inertsil ODS-3, 4,6\*250 mm, 5 um

Calibration Plot

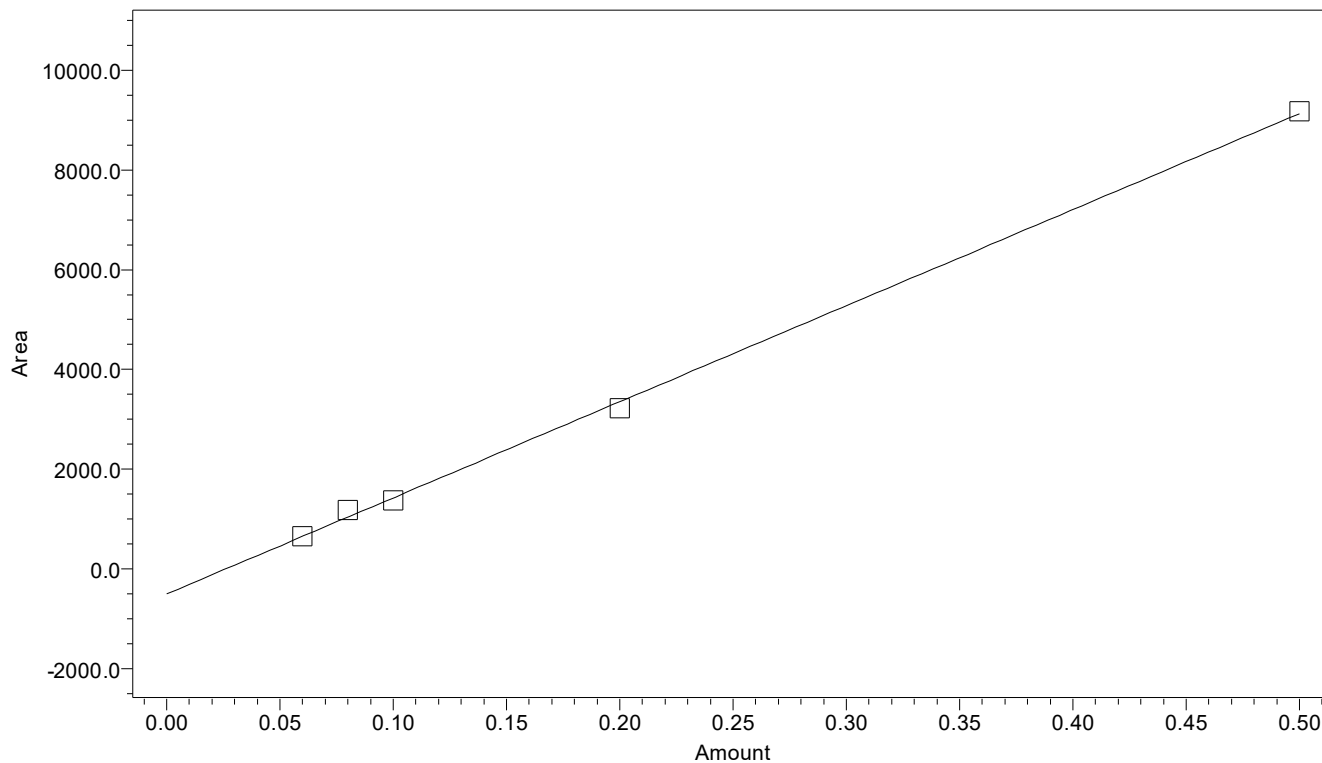

Name: Compound 1i; Processing Method: Seria Etil\_Cl 7 93 LOD LOQ; Fit Type: Linear (1st Order);  
 Cal Curve Id: 3430; A: -5.017253e+002; B: 1.926590e+004; C: 0.000000e+000; D: 0.000000e+000;  
 R^2: 0.999152; Standard Error 1.183270e+002

## Calibration Curve

Reported by User: Roman Roxana (roman\_roxana)  
 Acquisition Server: Waters-cd3  
 Project Name: Teste\Thiazides  
 Sample Set Name: Seria Etil\_CI 7 93 LOD LOQ  
 Code column: Inertsil ODS-3, 4,6\*250 mm, 5 um

Calibration Plot

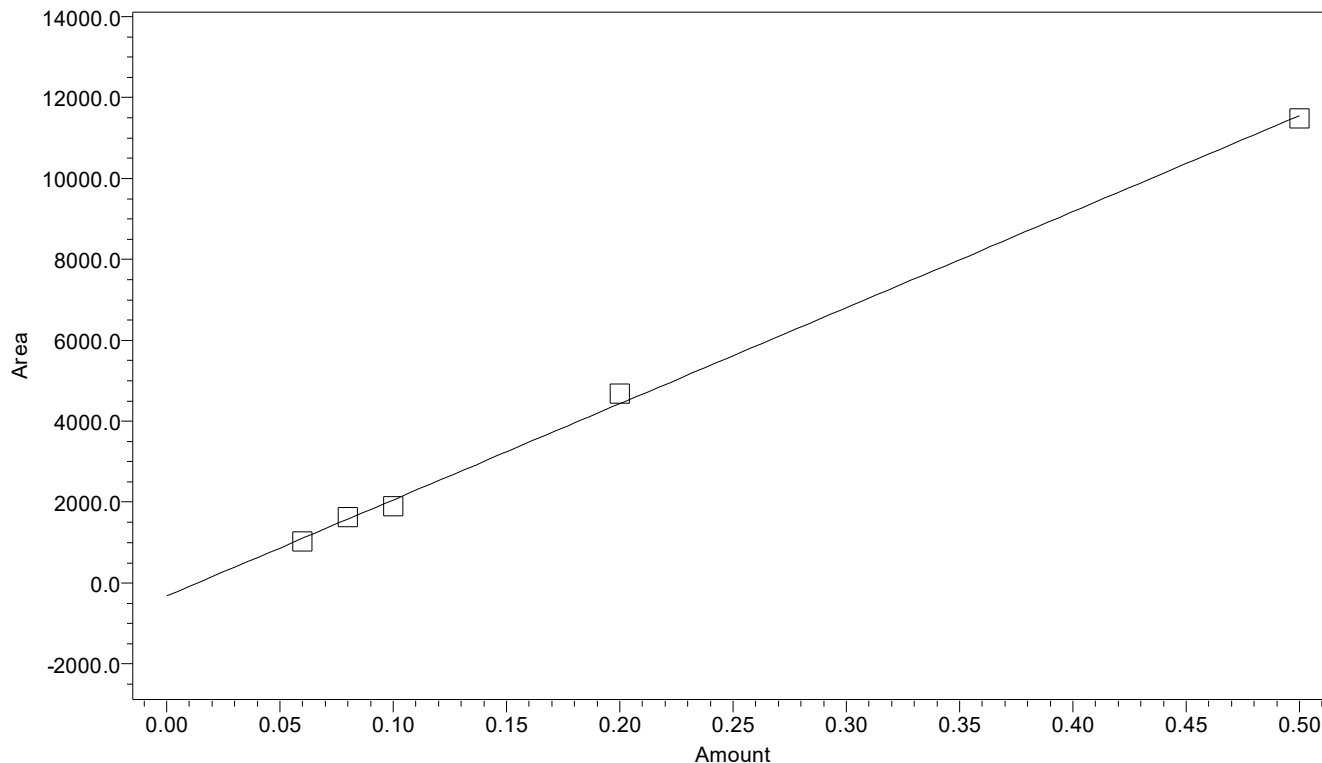

Name: Compound 1h; Processing Method: Seria Etil\_CI 7 93 LOD LOQ; Fit Type: Linear (1st Order);  
 Cal Curve Id: 3428; A: -3.199665e+002; B: 2.375089e+004; C: 0.000000e+000; D: 0.000000e+000;  
 R^2: 0.998684; Standard Error 1.817157e+002



# Calibration Curve

Reported by User: Roman Roxana (roman\_roxana)  
 Acquisition Server: Waters-cd3  
 Project Name: Teste\Thiazides  
 Sample Set Name: Seria Etil\_Cl 7 93 LOD LOQ  
 Code column: Inertsil ODS-3, 4,6\*250 mm, 5 um

Calibration Plot

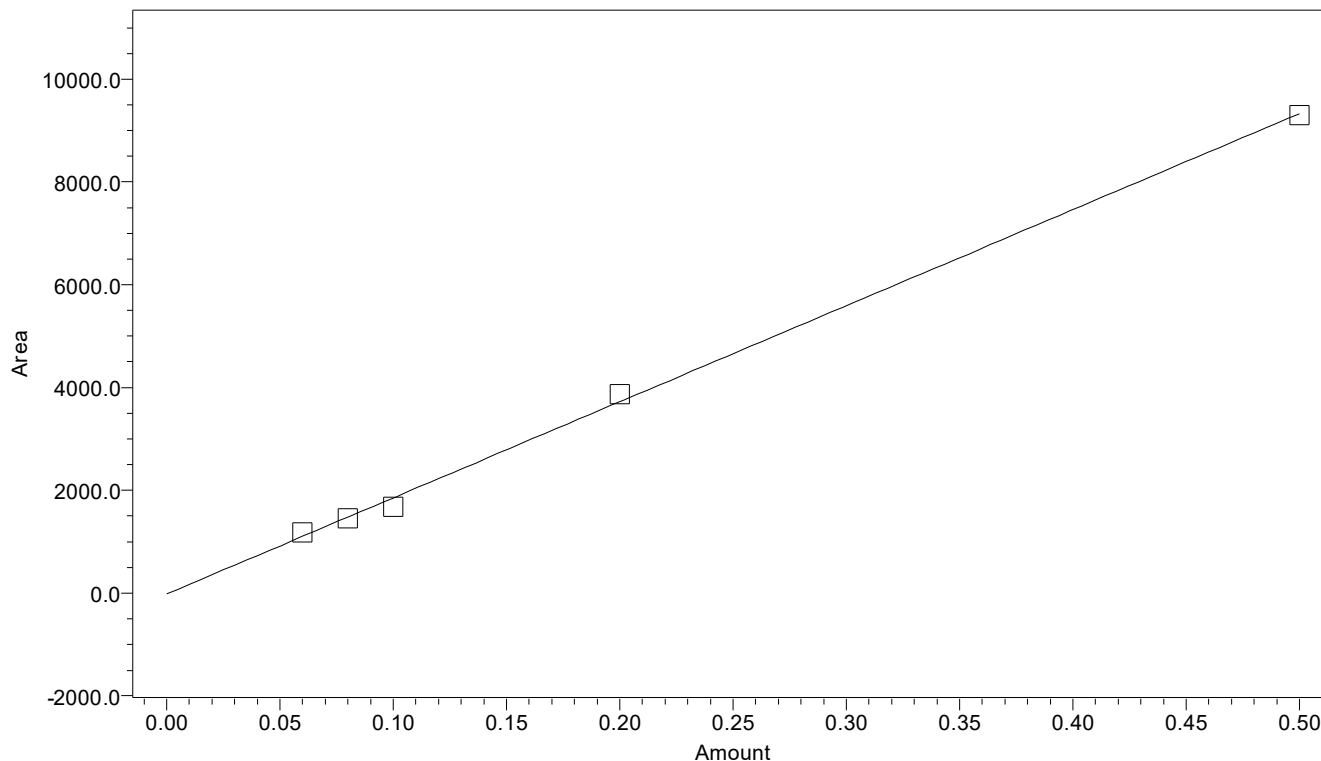

Name: Compound 1m; Processing Method: Seria Etil\_Cl 7 93 LOD LOQ; Fit Type: Linear (1st Order);  
 Cal Curve Id: 3431; A: -1.678743e+001; B: 1.869635e+004; C: 0.000000e+000; D: 0.000000e+000;  
 R^2: 0.998752; Standard Error 1.393188e+002

## Calibration Curve

Reported by User: Roman Roxana (roman\_roxana)  
 Acquisition Server: Waters-cd3  
 Project Name: Teste\Thiazides  
 Sample Set Name: Seria Etil\_CI 7 93 LOD LOQ  
 Code column: Inertsil ODS-3, 4,6\*250 mm, 5 um

Calibration Plot

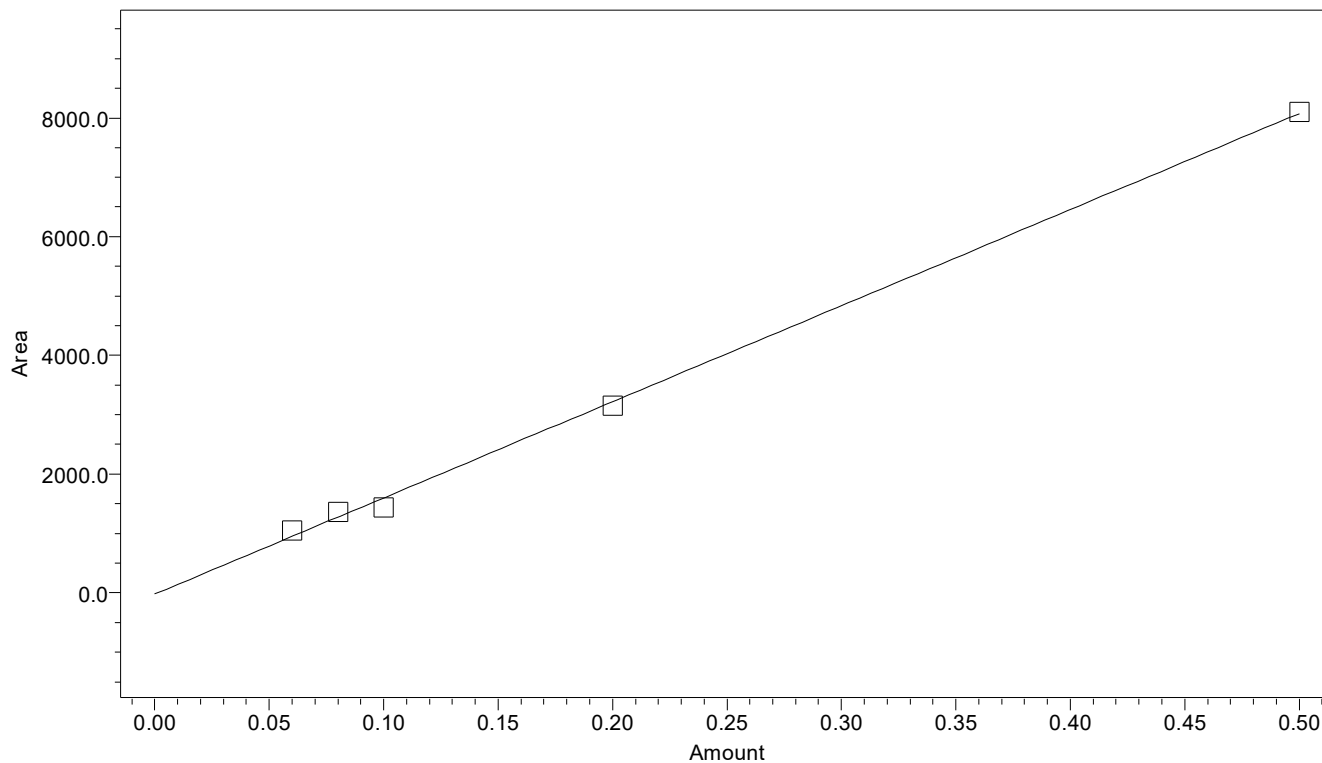

Name: Compound 1g; Processing Method: Seria Etil\_CI 7 93 LOD LOQ; Fit Type: Linear (1st Order);  
 Cal Curve Id: 3432; A: -2.012483e+001; B: 1.618843e+004; C: 0.000000e+000; D: 0.000000e+000;  
 R<sup>2</sup>: 0.998612; Standard Error 1.272319e+002

## Calibration Curve

Reported by User: Roman Roxana (roman\_roxana)  
 Acquisition Server: Waters-cd3  
 Project Name: Teste\Thiazides  
 Sample Set Name: Seria Etil\_CI 7 93 LOD LOQ  
 Code column: Inertsil ODS-3, 4,6\*250 mm, 5 um

Calibration Plot

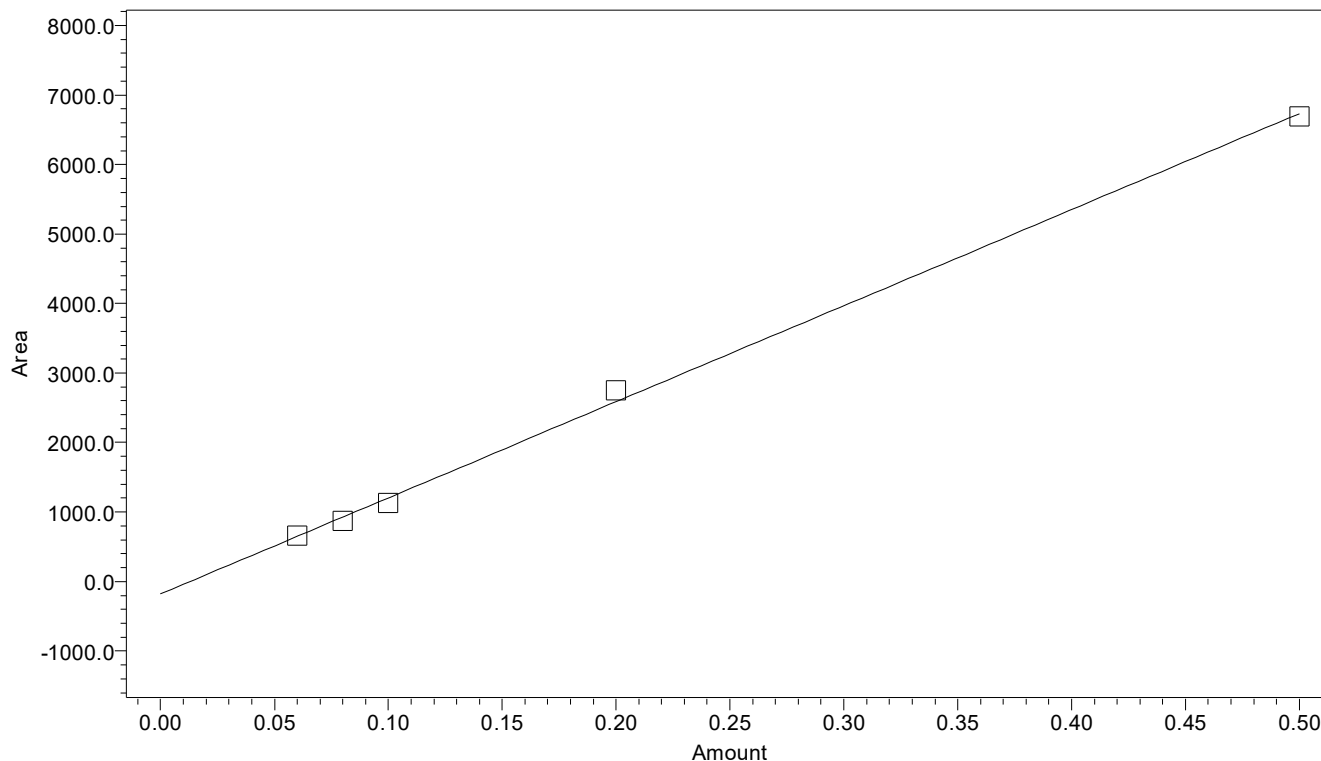

Name: Compound 1n; Processing Method: Seria Etil\_CI 7 93 LOD LOQ; Fit Type: Linear (1st Order);  
 Cal Curve Id: 3433; A: -1.795412e+002; B: 1.382725e+004; C: 0.000000e+000; D: 0.000000e+000;  
 R^2: 0.998571; Standard Error 1.102460e+002

## Calibration Curve

Reported by User: Roman Roxana (roman\_roxana)

Acquisition Server: Waters-cd3

Project Name: Teste\Thiazides

Sample Set Name: Seria Etil\_CI 7 93 LOD LOQ

Code column: Inertsil ODS-3, 4,6\*250 mm, 5 um

Peak: Compound 1j

|   | Name        | Level | X Value  | Response     | Calc. Value | % Deviation | Manual | Ignore |
|---|-------------|-------|----------|--------------|-------------|-------------|--------|--------|
| 1 | Compound 1j | 1.2   | 0.060000 | 1630.472851  | 0.065073    | 8.455       | No     | No     |
| 2 | Compound 1j | 1.6   | 0.080000 | 2131.073691  | 0.083709    | 4.636       | No     | No     |
| 3 | Compound 1j | 2     | 0.100000 | 2500.255530  | 0.097452    | -2.548      | No     | No     |
| 4 | Compound 1j | 4     | 0.200000 | 5006.904369  | 0.190765    | -4.617      | No     | No     |
| 5 | Compound 1j | 10    | 0.500000 | 13394.404392 | 0.503001    | 0.600       | No     | No     |

Peak: Compound 1i

|   | Name        | Level | X Value  | Response    | Calc. Value | % Deviation | Manual | Ignore |
|---|-------------|-------|----------|-------------|-------------|-------------|--------|--------|
| 1 | Compound 1i | 1.2   | 0.060000 | 658.292950  | 0.060211    | 0.352       | No     | No     |
| 2 | Compound 1i | 1.6   | 0.080000 | 1179.678589 | 0.087274    | 9.092       | No     | No     |
| 3 | Compound 1i | 2     | 0.100000 | 1374.135930 | 0.097367    | -2.633      | No     | No     |
| 4 | Compound 1i | 4     | 0.200000 | 3216.945031 | 0.193018    | -3.491      | No     | No     |
| 5 | Compound 1i | 10    | 0.500000 | 9172.262513 | 0.502130    | 0.426       | No     | No     |

## Calibration Curve

Reported by User: Roman Roxana (roman\_roxana)  
 Acquisition Server: Waters-cd3  
 Project Name: Teste\Thiazides  
 Sample Set Name: Seria Etil\_CI 7 93 LOD LOQ  
 Code column: Inertsil ODS-3, 4,6\*250 mm, 5 um

Peak: Compound 1h

|   | Name        | Level | X Value  | Response     | Calc. Value | % Deviation | Manual | Ignore |
|---|-------------|-------|----------|--------------|-------------|-------------|--------|--------|
| 1 | Compound 1h | 1.2   | 0.060000 | 1033.810066  | 0.056999    | -5.002      | No     | No     |
| 2 | Compound 1h | 1.6   | 0.080000 | 1626.691286  | 0.081961    | 2.452       | No     | No     |
| 3 | Compound 1h | 2     | 0.100000 | 1897.291020  | 0.093355    | -6.645      | No     | No     |
| 4 | Compound 1h | 4     | 0.200000 | 4679.969503  | 0.210516    | 5.258       | No     | No     |
| 5 | Compound 1h | 10    | 0.500000 | 11488.238406 | 0.497169    | -0.566      | No     | No     |

Peak: Compound 1m

|   | Name        | Level | X Value  | Response    | Calc. Value | % Deviation | Manual | Ignore |
|---|-------------|-------|----------|-------------|-------------|-------------|--------|--------|
| 1 | Compound 1m | 1.2   | 0.060000 | 1178.133697 | 0.063912    | 6.520       | No     | No     |
| 2 | Compound 1m | 1.6   | 0.080000 | 1459.015714 | 0.078935    | -1.331      | No     | No     |
| 3 | Compound 1m | 2     | 0.100000 | 1681.569370 | 0.090839    | -9.161      | No     | No     |
| 4 | Compound 1m | 4     | 0.200000 | 3871.449351 | 0.207968    | 3.984       | No     | No     |
| 5 | Compound 1m | 10    | 0.500000 | 9300.465892 | 0.498346    | -0.331      | No     | No     |

## Calibration Curve

Reported by User: Roman Roxana (roman\_roxana)  
 Acquisition Server: Waters-cd3  
 Project Name: Teste\Thiazides  
 Sample Set Name: Seria Etil\_CI 7 93 LOD LOQ  
 Code column: Inertsil ODS-3, 4,6\*250 mm, 5 um

Peak: Compound 1g

|   | Name        | Level | X Value  | Response    | Calc. Value | % Deviation | Manual | Ignore |
|---|-------------|-------|----------|-------------|-------------|-------------|--------|--------|
| 1 | Compound 1g | 1.2   | 0.060000 | 1052.049420 | 0.066231    | 10.385      | No     | No     |
| 2 | Compound 1g | 1.6   | 0.080000 | 1365.145509 | 0.085572    | 6.965       | No     | No     |
| 3 | Compound 1g | 2     | 0.100000 | 1438.295635 | 0.090090    | -9.910      | No     | No     |
| 4 | Compound 1g | 4     | 0.200000 | 3157.245813 | 0.196274    | -1.863      | No     | No     |
| 5 | Compound 1g | 10    | 0.500000 | 8103.768340 | 0.501833    | 0.367       | No     | No     |

Peak: Compound 1n

|   | Name        | Level | X Value  | Response    | Calc. Value | % Deviation | Manual | Ignore |
|---|-------------|-------|----------|-------------|-------------|-------------|--------|--------|
| 1 | Compound 1n | 1.2   | 0.060000 | 657.712692  | 0.060551    | 0.918       | No     | No     |
| 2 | Compound 1n | 1.6   | 0.080000 | 872.309723  | 0.076071    | -4.911      | No     | No     |
| 3 | Compound 1n | 2     | 0.100000 | 1130.181323 | 0.094720    | -5.280      | No     | No     |
| 4 | Compound 1n | 4     | 0.200000 | 2748.131849 | 0.211732    | 5.866       | No     | No     |
| 5 | Compound 1n | 10    | 0.500000 | 6691.573399 | 0.496926    | -0.615      | No     | No     |

# LOD\_LOQ\_CI\_Report

Reported by User: Roman Roxana (roman\_roxana)  
Acquisition Server: Waters-cd3  
Project Name: Teste\Thiazides  
Sample Set Name: Seria Etil\_CI 7 93 LOD LOQ  
Code column: Inertsil ODS-3 250\*4.6 mm 5um LA140

## SAMPLE INFORMATION

|                   |                      |                     |                                |
|-------------------|----------------------|---------------------|--------------------------------|
| Sample Name:      | Solution 0.06 ug/ mL | Date Acquired:      | 2/11/2023 12:28:03 PM EET      |
| Sample Type:      | Standard             | Acq. Method Set:    | Seria Etil_CI 7 93 LOD LOQ     |
| Vial:             | 10                   | Date Processed:     | 2/11/2023 2:48:22 PM EET       |
| Injection #:      | 1                    | Processing Method:  | Seria Etil_CI 7 93 LOD LOQ     |
| Injection Volume: | 10.00 ul             | Channel Name:       | Extract 275                    |
| Run Time:         | 30.0 Minutes         | Proc. Chnl. Descr.: | 2998 PDA 275.0 nm, Smoothed by |
| Acquired By:      | roman_roxana         |                     |                                |

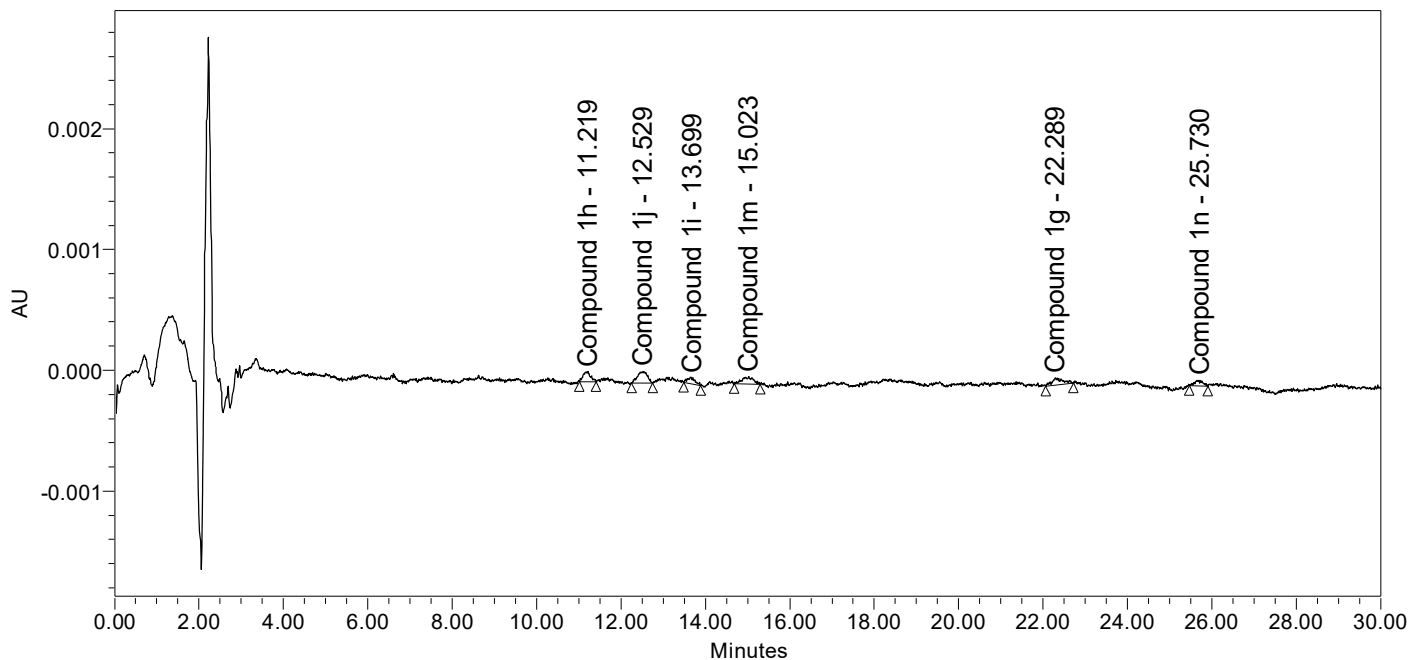

|   | Peak Name   | RT     | Area | Height (μV) | Resolution | Level |
|---|-------------|--------|------|-------------|------------|-------|
| 1 | Compound 1h | 11.219 | 1034 | 83          |            | 1.2   |
| 2 | Compound 1j | 12.529 | 1630 | 100         | 3.4        | 1.2   |
| 3 | Compound 1i | 13.699 | 658  | 52          | 2.7        | 1.2   |
| 4 | Compound 1m | 15.023 | 1178 | 64          | 2.6        | 1.2   |
| 5 | Compound 1g | 22.289 | 1052 | 57          | 14.9       | 1.2   |
| 6 | Compound 1n | 25.730 | 658  | 49          | 9.1        | 1.2   |

# LOD\_LOQ\_CI\_Report

Reported by User: Roman Roxana (roman\_roxana)  
Acquisition Server: Waters-cd3  
Project Name: Teste\Thiazides  
Sample Set Name: Seria Etil\_CI 7 93 LOD LOQ  
Code column: Inertsil ODS-3 250\*4.6 mm 5um LA140

## SAMPLE INFORMATION

|                   |                      |                     |                                |
|-------------------|----------------------|---------------------|--------------------------------|
| Sample Name:      | Solution 0.08 ug/ mL | Date Acquired:      | 2/11/2023 12:59:00 PM EET      |
| Sample Type:      | Standard             | Acq. Method Set:    | Seria Etil_CI 7 93 LOD LOQ     |
| Vial:             | 11                   | Date Processed:     | 2/11/2023 2:45:01 PM EET       |
| Injection #:      | 1                    | Processing Method:  | Seria Etil_CI 7 93 LOD LOQ     |
| Injection Volume: | 10.00 ul             | Channel Name:       | Extract 275                    |
| Run Time:         | 30.0 Minutes         | Proc. Chnl. Descr.: | 2998 PDA 275.0 nm, Smoothed by |
| Acquired By:      | roman_roxana         |                     |                                |

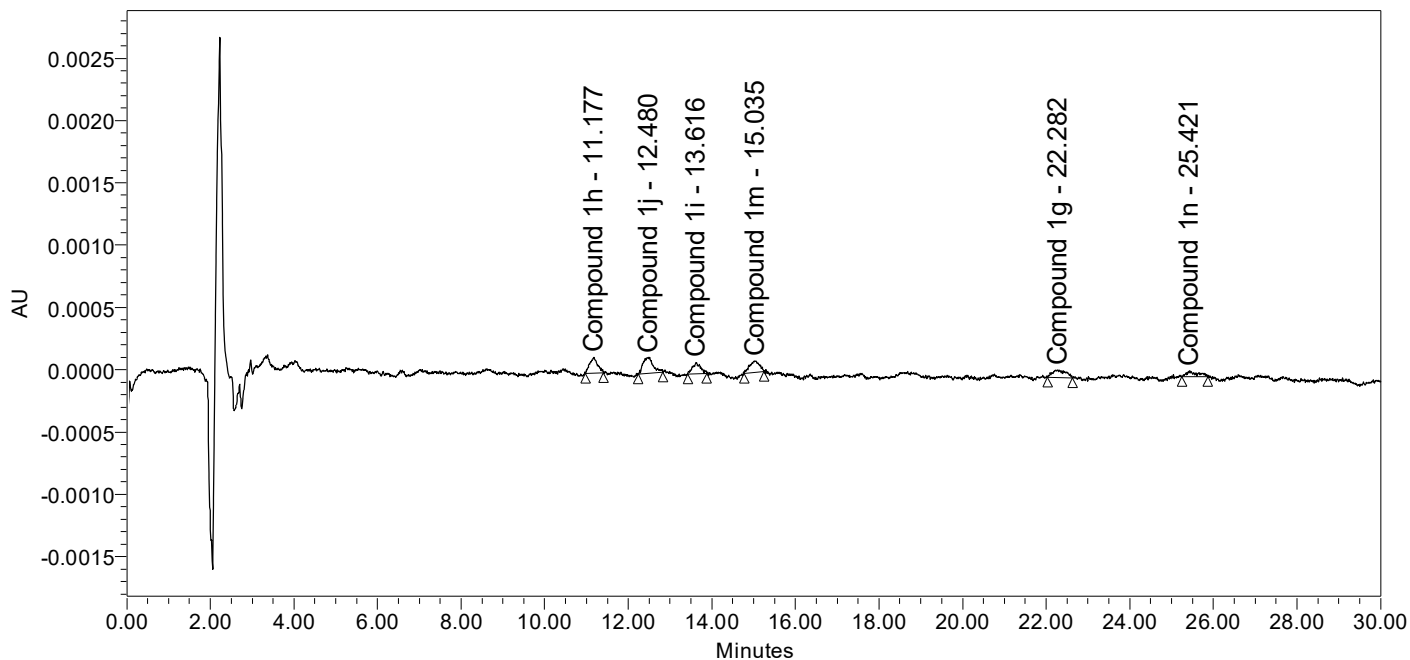

|   | Peak Name   | RT     | Area | Height (μV) | Resolution | Level |
|---|-------------|--------|------|-------------|------------|-------|
| 1 | Compound 1h | 11.177 | 1627 | 126         |            | 1.6   |
| 2 | Compound 1j | 12.480 | 2131 | 125         | 3.5        | 1.6   |
| 3 | Compound 1i | 13.616 | 1180 | 91          | 3.0        | 1.6   |
| 4 | Compound 1m | 15.035 | 1459 | 88          | 3.4        | 1.6   |
| 5 | Compound 1g | 22.282 | 1365 | 60          | 11.6       | 1.6   |
| 6 | Compound 1n | 25.421 | 872  | 46          | 5.6        | 1.6   |



# LOD\_LOQ\_CI\_Report

Reported by User: Roman Roxana (roman\_roxana)  
Acquisition Server: Waters-cd3  
Project Name: Teste\Thiazides  
Sample Set Name: Seria Etil\_CI 7 93 LOD LOQ  
Code column: Inertsil ODS-3 250\*4.6 mm 5um LA140

## SAMPLE INFORMATION

|                   |                      |                     |                                |
|-------------------|----------------------|---------------------|--------------------------------|
| Sample Name:      | Solution 0.10 ug/ mL | Date Acquired:      | 2/11/2023 1:29:40 PM EET       |
| Sample Type:      | Standard             | Acq. Method Set:    | Seria Etil_CI 7 93 LOD LOQ     |
| Vial:             | 12                   | Date Processed:     | 2/11/2023 3:05:49 PM EET       |
| Injection #:      | 1                    | Processing Method:  | Seria Etil_CI 7 93 LOD LOQ     |
| Injection Volume: | 10.00 ul             | Channel Name:       | Extract 275                    |
| Run Time:         | 30.0 Minutes         | Proc. Chnl. Descr.: | 2998 PDA 275.0 nm, Smoothed by |
| Acquired By:      | roman_roxana         |                     |                                |

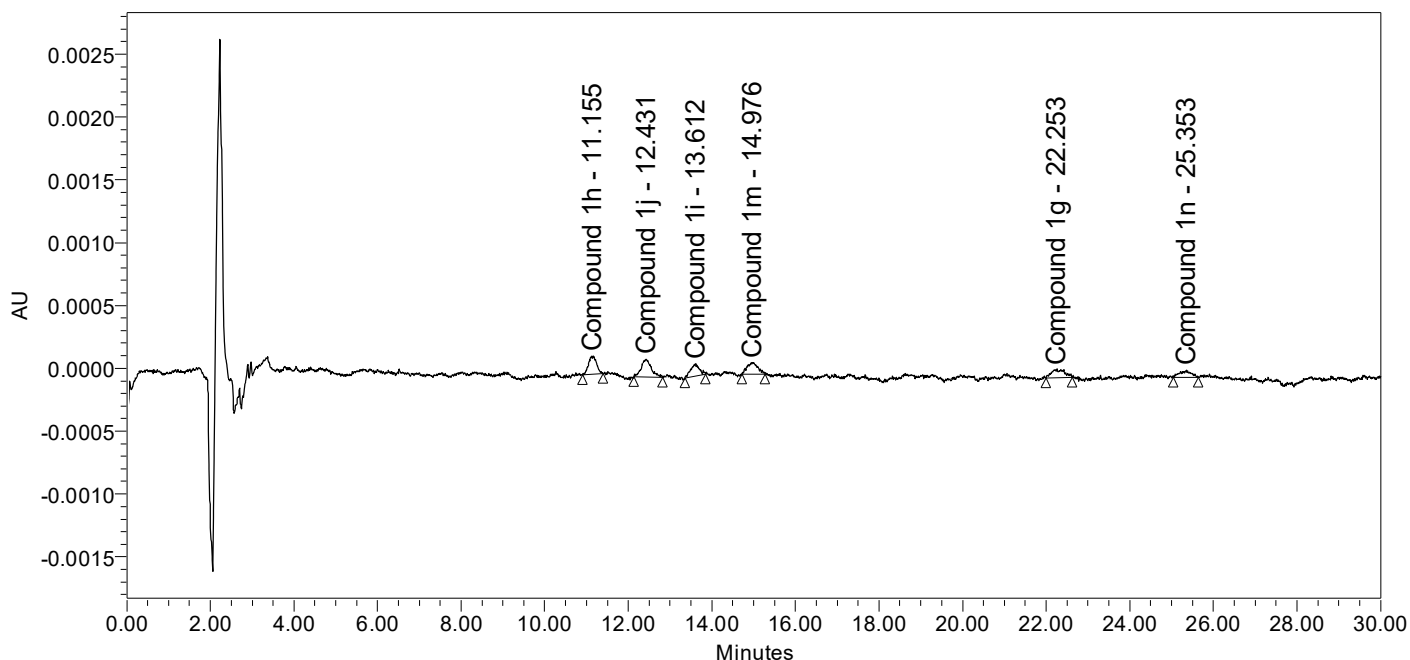

|   | Peak Name   | RT     | Area | Height (μV) | Resolution | Level |
|---|-------------|--------|------|-------------|------------|-------|
| 1 | Compound 1h | 11.155 | 1897 | 144         |            | 2     |
| 2 | Compound 1j | 12.431 | 2500 | 143         | 3.3        | 2     |
| 3 | Compound 1i | 13.612 | 1374 | 95          | 3.0        | 2     |
| 4 | Compound 1m | 14.976 | 1682 | 94          | 3.1        | 2     |
| 5 | Compound 1g | 22.253 | 1438 | 67          | 13.8       | 2     |
| 6 | Compound 1n | 25.353 | 1130 | 59          | 5.8        | 2     |

# LOD\_LOQ\_CI\_Report

Reported by User: Roman Roxana (roman\_roxana)  
Acquisition Server: Waters-cd3  
Project Name: Teste\Thiazides  
Sample Set Name: Seria Etil\_CI 7 93 LOD LOQ  
Code column: Inertsil ODS-3 250\*4.6 mm 5um LA140

## SAMPLE INFORMATION

|                   |                      |                     |                                |
|-------------------|----------------------|---------------------|--------------------------------|
| Sample Name:      | Solution 0.20 ug/ mL | Date Acquired:      | 2/11/2023 2:00:20 PM EET       |
| Sample Type:      | Standard             | Acq. Method Set:    | Seria Etil_CI 7 93 LOD LOQ     |
| Vial:             | 13                   | Date Processed:     | 2/11/2023 3:11:22 PM EET       |
| Injection #:      | 1                    | Processing Method:  | Seria Etil_CI 7 93 LOD LOQ     |
| Injection Volume: | 10.00 ul             | Channel Name:       | Extract 275                    |
| Run Time:         | 30.0 Minutes         | Proc. Chnl. Descr.: | 2998 PDA 275.0 nm, Smoothed by |
| Acquired By:      | roman_roxana         |                     |                                |

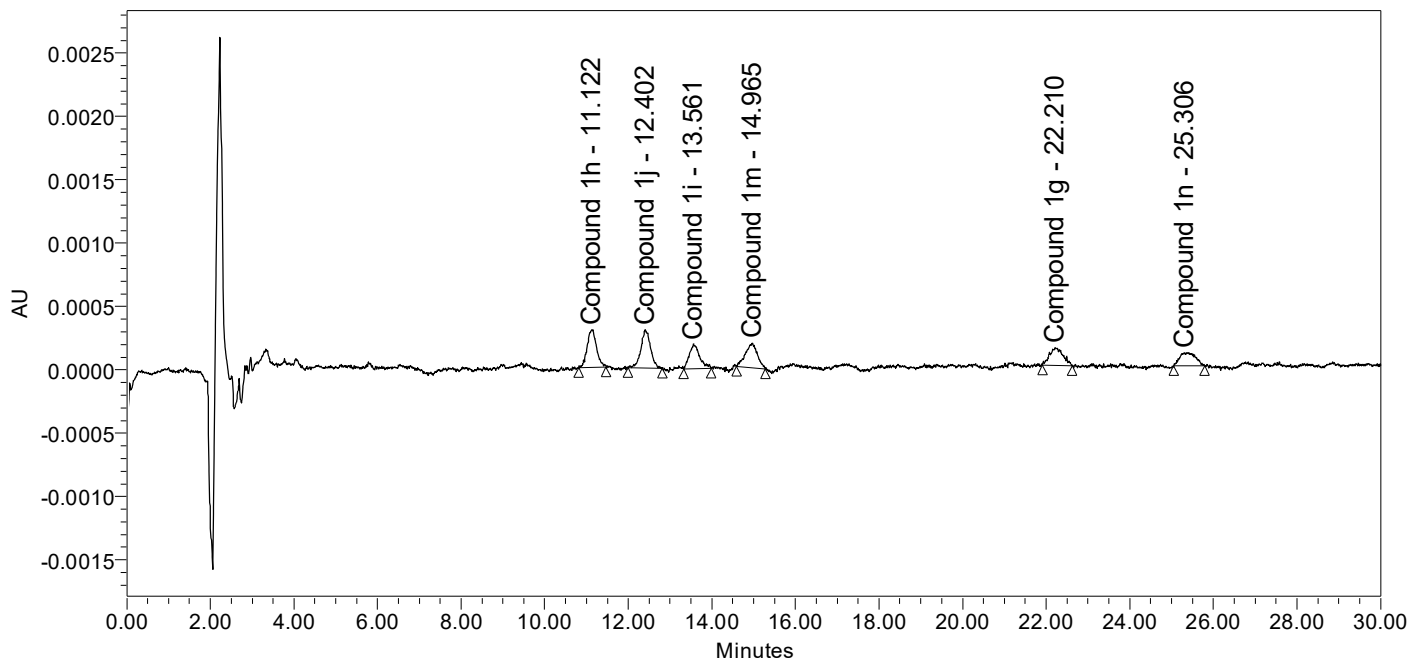

|   | Peak Name   | RT     | Area | Height (μV) | Resolution | Level |
|---|-------------|--------|------|-------------|------------|-------|
| 1 | Compound 1h | 11.122 | 4680 | 297         |            | 4     |
| 2 | Compound 1j | 12.402 | 5007 | 302         | 3.1        | 4     |
| 3 | Compound 1i | 13.561 | 3217 | 192         | 2.8        | 4     |
| 4 | Compound 1m | 14.965 | 3871 | 195         | 2.9        | 4     |
| 5 | Compound 1g | 22.210 | 3157 | 141         | 12.3       | 4     |
| 6 | Compound 1n | 25.306 | 2748 | 104         | 4.4        | 4     |

# LOD\_LOQ\_CI\_Report

Reported by User: Roman Roxana (roman\_roxana)  
Acquisition Server: Waters-cd3  
Project Name: Teste\Thiazides  
Sample Set Name: Seria Etil\_CI 7 93 LOD LOQ  
Code column: Inertsil ODS-3 250\*4.6 mm 5um LA140

## SAMPLE INFORMATION

|                   |                      |                     |                                |
|-------------------|----------------------|---------------------|--------------------------------|
| Sample Name:      | Solution 0.50 ug/ mL | Date Acquired:      | 2/11/2023 11:52:09 AM EET      |
| Sample Type:      | Standard             | Acq. Method Set:    | Seria Etil_CI 7 93 LOD LOQ     |
| Vial:             | 14                   | Date Processed:     | 2/11/2023 2:31:36 PM EET       |
| Injection #:      | 1                    | Processing Method:  | Seria Etil_CI 7 93 LOD LOQ     |
| Injection Volume: | 10.00 ul             | Channel Name:       | Extract 275                    |
| Run Time:         | 40.0 Minutes         | Proc. Chnl. Descr.: | 2998 PDA 275.0 nm, Smoothed by |
| Acquired By:      | roman_roxana         |                     |                                |

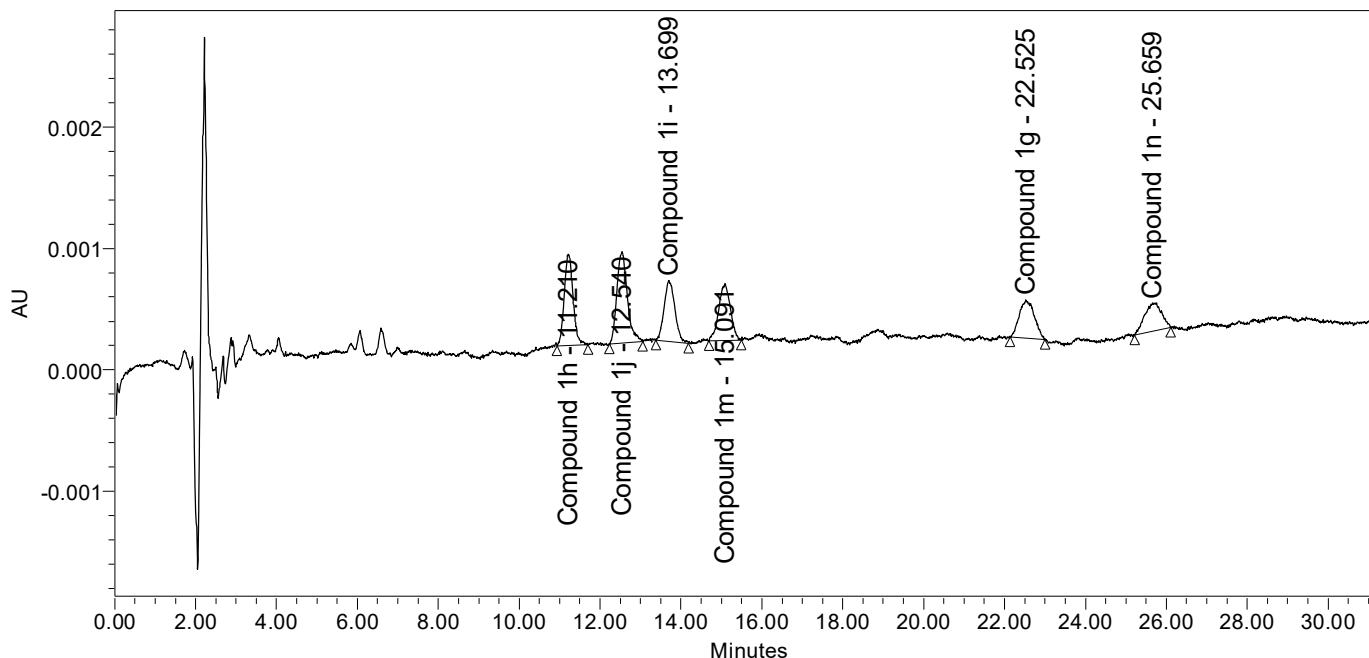

|   | Peak Name   | RT     | Area  | Height (µV) | Resolution | Level |
|---|-------------|--------|-------|-------------|------------|-------|
| 1 | Compound 1h | 11.210 | 11488 | 754         |            | 10    |
| 2 | Compound 1j | 12.540 | 13394 | 751         | 3.1        | 10    |
| 3 | Compound 1i | 13.699 | 9172  | 500         | 2.5        | 10    |
| 4 | Compound 1m | 15.091 | 9300  | 466         | 2.8        | 10    |
| 5 | Compound 1g | 22.525 | 8104  | 315         | 12.0       | 10    |
| 6 | Compound 1n | 25.659 | 6692  | 230         | 4.0        | 10    |

**Quantitative determination of**  
***compounds 1g, 1h, 1i, 1j, 1m, 1n***

**- Validation of the analytical method -**

Validation parameters:

- Specificity
- Precision 1
- Precision 2
- LOD – LOQ
- **Linearity**
- **Range**
- Accuracy
- Robustness

## Calibration Curve

Reported by User: Roman Roxana (roman\_roxana)  
 Acquisition Server: Waters-cd3  
 Project Name: Teste\Thiazides  
 Sample Set Name: Seria Etil\_CI 7 93 LOD LOQ  
 Code column: Inertsil ODS-3, 4,6\*250 mm, 5 um

Calibration Plot

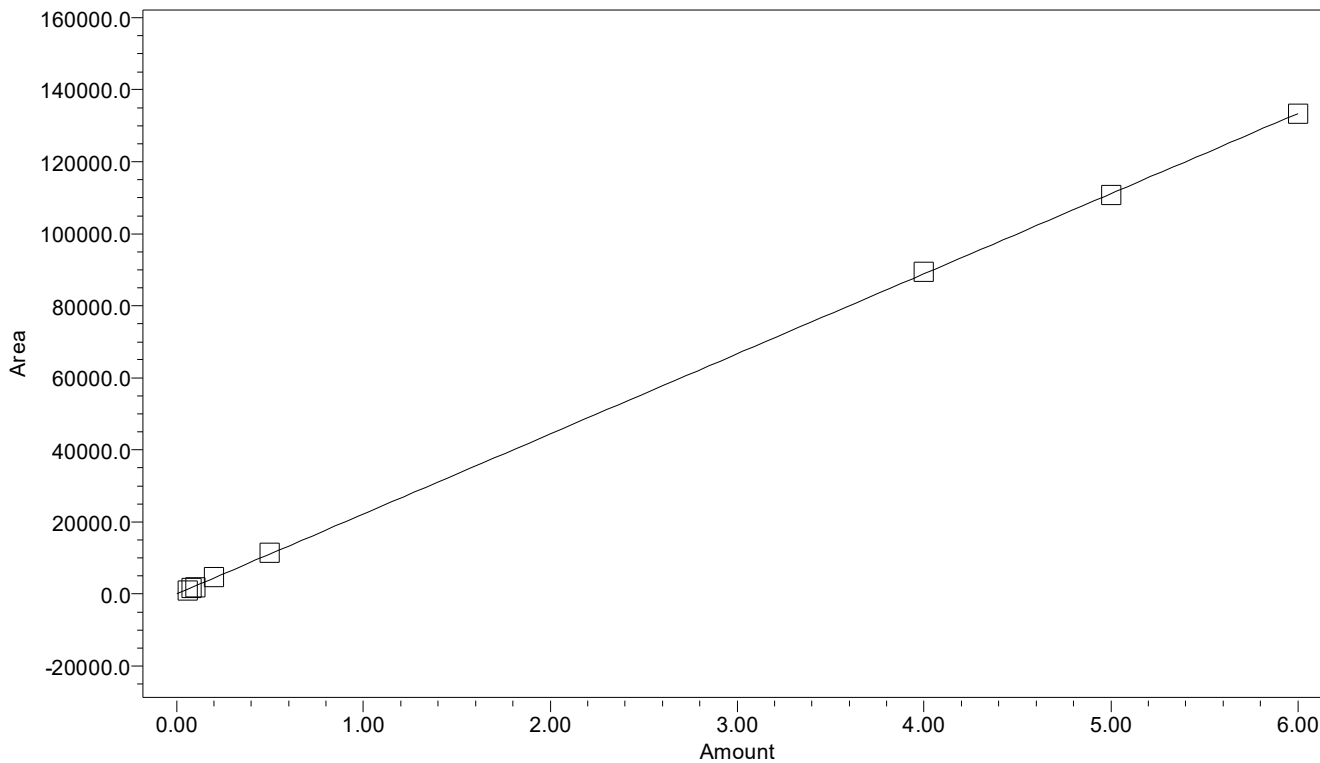

Name: Compound 1h; Processing Method: Seria Etil\_CI 7 93 Linearity; Fit Type: Linear (1st Order); Ca  
 Curve Id: 3987; A: -2.092550e+001; B: 2.223320e+004; C: 0.000000e+000; D: 0.000000e+000; R^2:  
 0.999961; Standard Error 3.833989e+002

# Calibration Curve

Reported by User: Roman Roxana (roman\_roxana)  
 Acquisition Server: Waters-cd3  
 Project Name: Teste\Thiazides  
 Sample Set Name: Seria Etil\_CI 7 93 LOD LOQ  
 Code column: Inertsil ODS-3, 4,6\*250 mm, 5 um

Calibration Plot

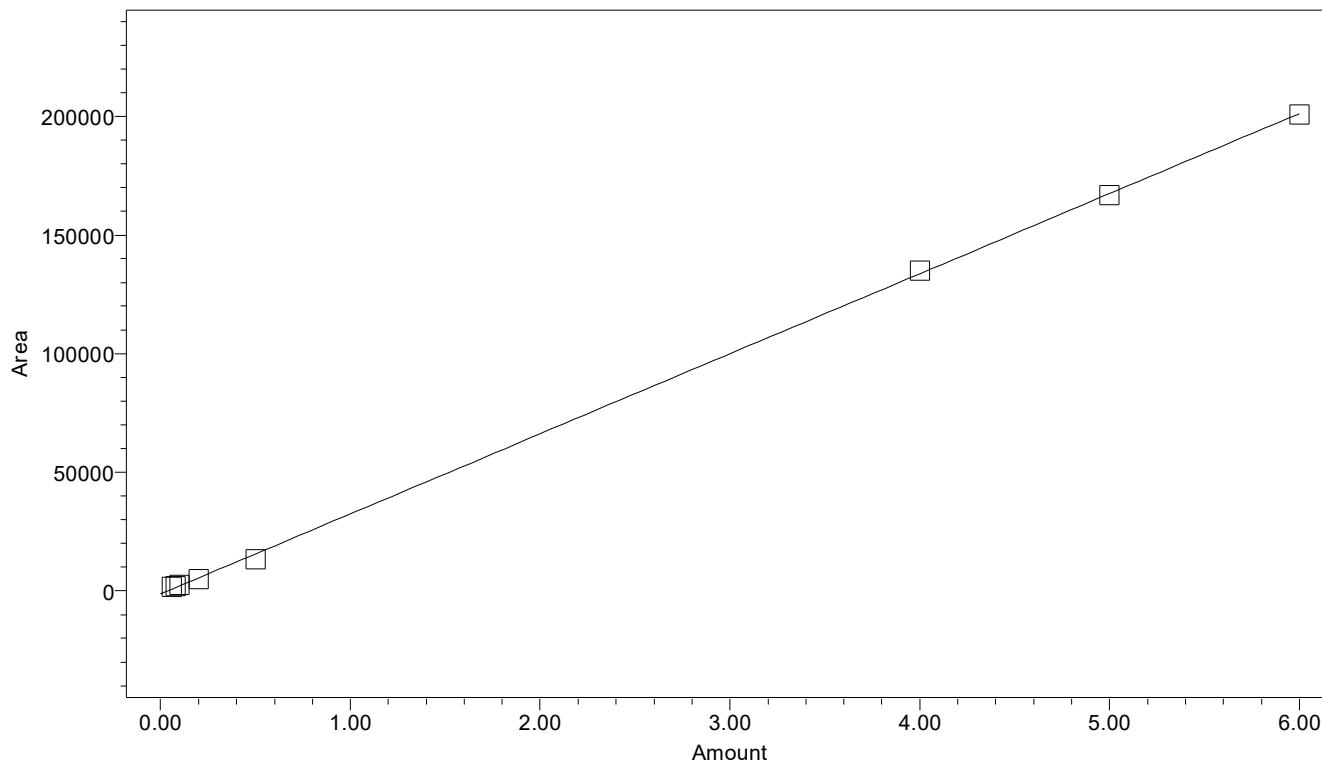

Name: Compound 1j; Processing Method: Seria Etil\_CI 7 93 Linearity; Fit Type: Linear (1st Order); Cal  
 Curve Id: 3988; A: -1.310292e+003; B: 3.375445e+004; C: 0.000000e+000; D: 0.000000e+000; R<sup>2</sup>:  
 0.999836; Standard Error 1.191983e+003

## Calibration Curve

Reported by User: Roman Roxana (roman\_roxana)  
 Acquisition Server: Waters-cd3  
 Project Name: Teste\Thiazides  
 Sample Set Name: Seria Etil\_CI 7 93 LOD LOQ  
 Code column: Inertsil ODS-3, 4,6\*250 mm, 5 um

Calibration Plot

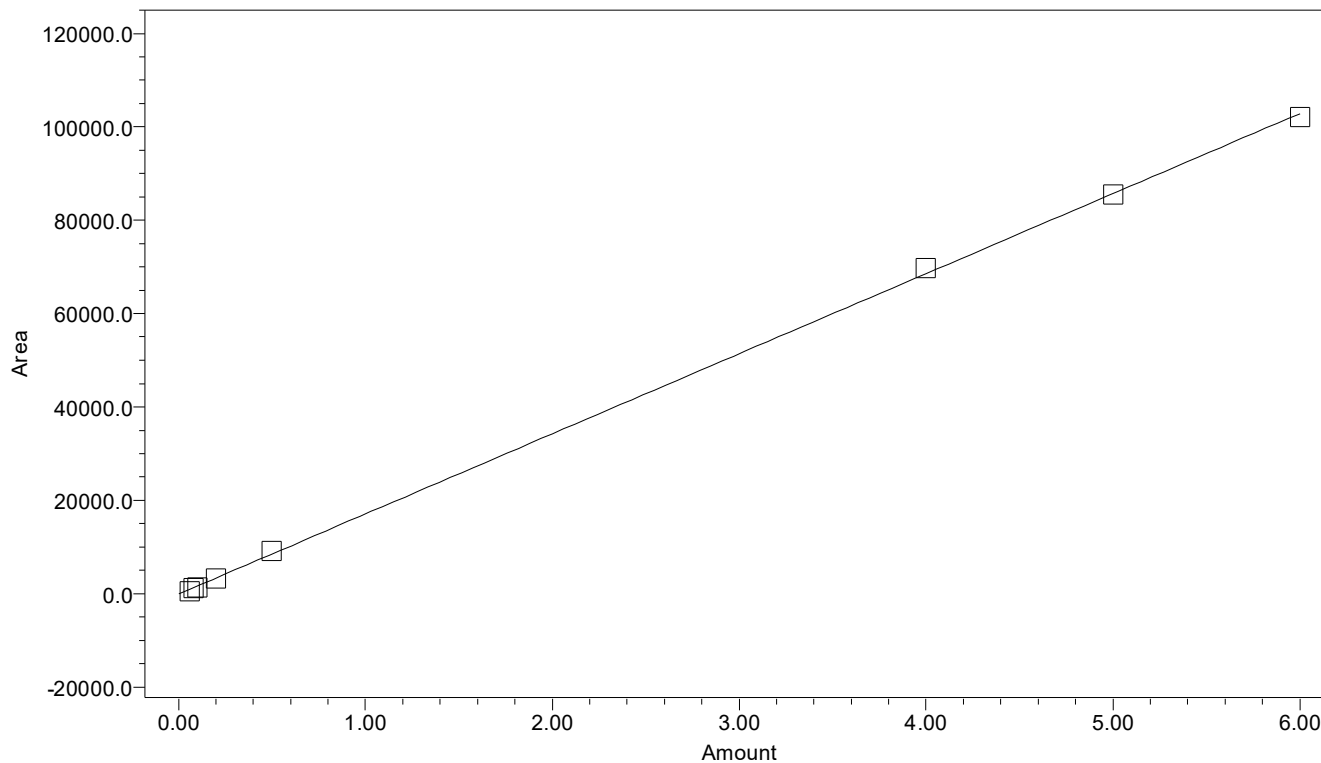

Name: Compound 1i; Processing Method: Seria Etil\_CI 7 93 Linearity; Fit Type: Linear (1st Order); Cal  
 Curve Id: 3989; A: -6.838016e+001; B: 1.715619e+004; C: 0.000000e+000; D: 0.000000e+000; R<sup>2</sup>:  
 0.999797; Standard Error 6.735168e+002

## Calibration Curve

Reported by User: Roman Roxana (roman\_roxana)  
 Acquisition Server: Waters-cd3  
 Project Name: Teste\Thiazides  
 Sample Set Name: Seria Etil\_Cl 7 93 LOD LOQ  
 Code column: Inertsil ODS-3, 4,6\*250 mm, 5 um

Calibration Plot

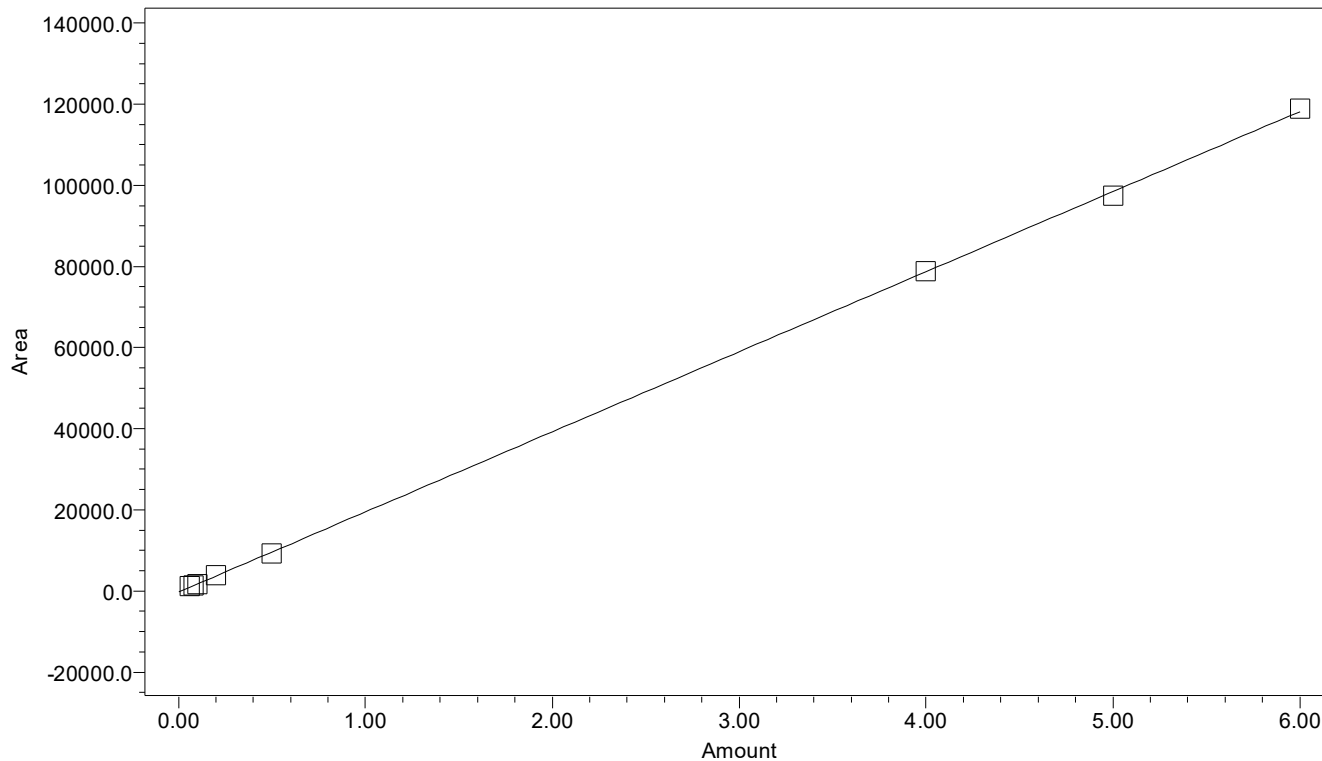

Name: Compound 1m; Processing Method: Seria Etil\_Cl 7 93 Linearity; Fit Type: Linear (1st Order);  
 Cal Curve Id: 3990; A: -2.314274e+002; B: 1.973490e+004; C: 0.000000e+000; D: 0.000000e+000;  
 R<sup>2</sup>: 0.999901; Standard Error 5.413499e+002



## Calibration Curve

Reported by User: Roman Roxana (roman\_roxana)  
 Acquisition Server: Waters-cd3  
 Project Name: Teste\Thiazides  
 Sample Set Name: Seria Etil\_CI 7 93 LOD LOQ  
 Code column: Inertsil ODS-3, 4,6\*250 mm, 5 um

Calibration Plot

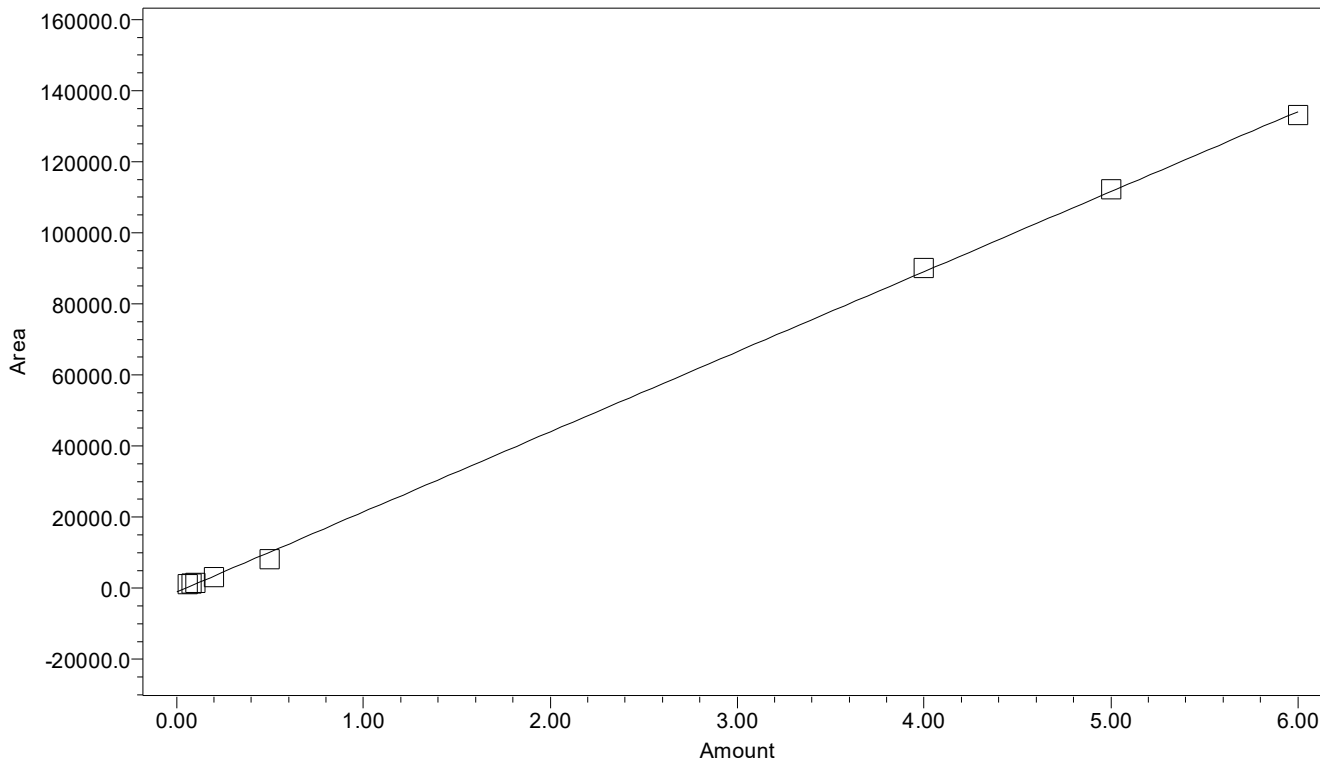

Name: Compound 1g; Processing Method: Seria Etil\_CI 7 93 Linearity; Fit Type: Linear (1st Order); Ca  
 Curve Id: 3991; A: -1.092978e+003; B: 2.253696e+004; C: 0.000000e+000; D: 0.000000e+000; R^2:  
 0.999658; Standard Error 1.147850e+003

## Calibration Curve

Reported by User: Roman Roxana (roman\_roxana)  
 Acquisition Server: Waters-cd3  
 Project Name: Teste\Thiazides  
 Sample Set Name: Seria Etil\_CI 7 93 LOD LOQ  
 Code column: Inertsil ODS-3, 4,6\*250 mm, 5 um

Calibration Plot

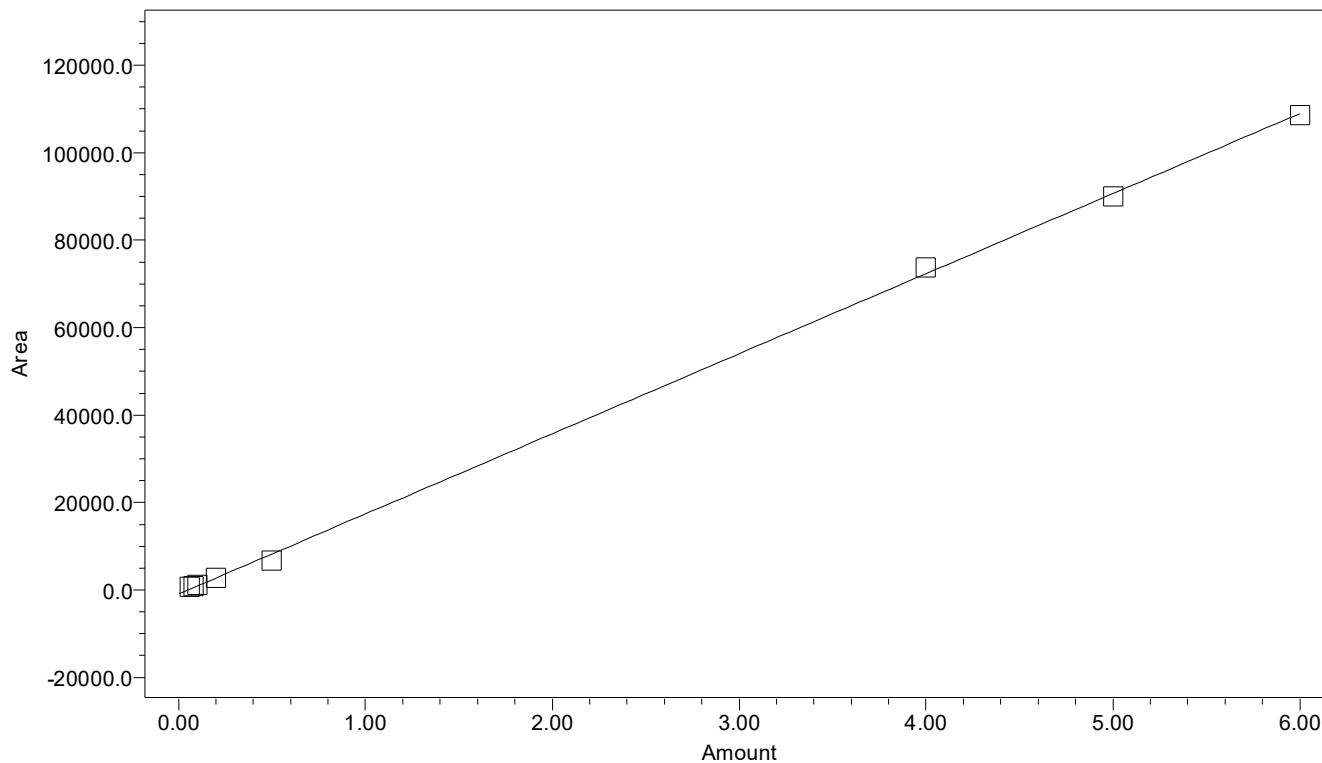

Name: Compound 1n; Processing Method: Seria Etil\_CI 7 93 Linearity; Fit Type: Linear (1st Order); Ca  
 Curve Id: 3992; A: -9.203579e+002; B: 1.831526e+004; C: 0.000000e+000; D: 0.000000e+000; R^2:  
 0.999640; Standard Error 9.571321e+002

## Calibration Curve

Reported by User: Roman Roxana (roman\_roxana)  
 Acquisition Server: Waters-cd3  
 Project Name: Teste\Thiazides  
 Sample Set Name: Seria Etil\_CI 7 93 LOD LOQ  
 Code column: Inertsil ODS-3, 4,6\*250 mm, 5 um

Peak Compound 1h

|   | Name        | Level | X Value  | Response      | Calc. Value | % Deviation | Manual | Ignore |
|---|-------------|-------|----------|---------------|-------------|-------------|--------|--------|
| 1 | Compound 1h | 1.2   | 0.060000 | 1034.327104   | 0.047463    | -20.895     | No     | No     |
| 2 | Compound 1h | 1.6   | 0.080000 | 1626.691286   | 0.074106    | -7.367      | No     | No     |
| 3 | Compound 1h | 2     | 0.100000 | 1896.802622   | 0.086255    | -13.745     | No     | No     |
| 4 | Compound 1h | 4     | 0.200000 | 4679.969503   | 0.211436    | 5.718       | No     | No     |
| 5 | Compound 1h | 10    | 0.500000 | 11488.238406  | 0.517657    | 3.531       | No     | No     |
| 6 | Compound 1h | 80    | 4.000000 | 89435.928781  | 4.023572    | 0.589       | No     | No     |
| 7 | Compound 1h | 100   | 5.000000 | 110697.564728 | 4.979873    | -0.403      | No     | No     |
| 8 | Compound 1h | 120   | 6.000000 | 133370.214705 | 5.999639    | -0.006      | No     | No     |

Peak Compound 1j

|   | Name        | Level | X Value  | Response      | Calc. Value | % Deviation | Manual | Ignore |
|---|-------------|-------|----------|---------------|-------------|-------------|--------|--------|
| 1 | Compound 1j | 1.2   | 0.060000 | 1630.336477   | 0.087118    | 45.197      | No     | No     |
| 2 | Compound 1j | 1.6   | 0.080000 | 2133.223118   | 0.102017    | 27.521      | No     | No     |
| 3 | Compound 1j | 2     | 0.100000 | 2500.255530   | 0.112890    | 12.890      | No     | No     |
| 4 | Compound 1j | 4     | 0.200000 | 5006.601112   | 0.187143    | -6.429      | No     | No     |
| 5 | Compound 1j | 10    | 0.500000 | 13394.404392  | 0.435637    | -12.873     | No     | No     |
| 6 | Compound 1j | 80    | 4.000000 | 135006.550565 | 4.038485    | 0.962       | No     | No     |
| 7 | Compound 1j | 100   | 5.000000 | 166926.181411 | 4.984127    | -0.317      | No     | No     |
| 8 | Compound 1j | 120   | 6.000000 | 200966.107959 | 5.992584    | -0.124      | No     | No     |

## Calibration Curve

Reported by User: Roman Roxana (roman\_roxana)  
 Acquisition Server: Waters-cd3  
 Project Name: Teste\Thiazides  
 Sample Set Name: Seria Etil\_CI 7 93 LOD LOQ  
 Code column: Inertsil ODS-3, 4,6\*250 mm, 5 um

Peak Compound 1i

|   | Name        | Level | X Value  | Response      | Calc. Value | % Deviation | Manual | Ignore |
|---|-------------|-------|----------|---------------|-------------|-------------|--------|--------|
| 1 | Compound 1i | 1.2   | 0.060000 | 507.119752    | 0.033545    | -44.092     | No     | No     |
| 2 | Compound 1i | 1.6   | 0.080000 | 1179.678589   | 0.072747    | -9.066      | No     | No     |
| 3 | Compound 1i | 2     | 0.100000 | 1374.135930   | 0.084081    | -15.919     | No     | No     |
| 4 | Compound 1i | 4     | 0.200000 | 3216.945031   | 0.191495    | -4.252      | No     | No     |
| 5 | Compound 1i | 10    | 0.500000 | 9171.385143   | 0.538567    | 7.713       | No     | No     |
| 6 | Compound 1i | 80    | 4.000000 | 69751.545178  | 4.069664    | 1.742       | No     | No     |
| 7 | Compound 1i | 100   | 5.000000 | 85573.309645  | 4.991883    | -0.162      | No     | No     |
| 8 | Compound 1i | 120   | 6.000000 | 102148.503946 | 5.958018    | -0.700      | No     | No     |

Peak Compound 1m

|   | Name        | Level | X Value  | Response      | Calc. Value | % Deviation | Manual | Ignore |
|---|-------------|-------|----------|---------------|-------------|-------------|--------|--------|
| 1 | Compound 1m | 1.2   | 0.060000 | 1178.133697   | 0.071425    | 19.041      | No     | No     |
| 2 | Compound 1m | 1.6   | 0.080000 | 1459.015714   | 0.085658    | 7.072       | No     | No     |
| 3 | Compound 1m | 2     | 0.100000 | 1681.569370   | 0.096935    | -3.065      | No     | No     |
| 4 | Compound 1m | 4     | 0.200000 | 3871.449351   | 0.207899    | 3.950       | No     | No     |
| 5 | Compound 1m | 10    | 0.500000 | 9300.465892   | 0.482997    | -3.401      | No     | No     |
| 6 | Compound 1m | 80    | 4.000000 | 78850.929572  | 4.007233    | 0.181       | No     | No     |
| 7 | Compound 1m | 100   | 5.000000 | 97455.666410  | 4.949965    | -1.001      | No     | No     |
| 8 | Compound 1m | 120   | 6.000000 | 118925.732651 | 6.037889    | 0.631       | No     | No     |

## Calibration Curve

Reported by User: Roman Roxana (roman\_roxana)  
 Acquisition Server: Waters-cd3  
 Project Name: Teste\Thiazides  
 Sample Set Name: Seria Etil\_CI 7 93 LOD LOQ  
 Code column: Inertsil ODS-3, 4,6\*250 mm, 5 um

Peak Compound 1g

|   | Name        | Level | X Value  | Response      | Calc. Value | % Deviation | Manual | Ignore |
|---|-------------|-------|----------|---------------|-------------|-------------|--------|--------|
| 1 | Compound 1g | 1.2   | 0.060000 | 1053.315079   | 0.095234    | 58.724      | No     | No     |
| 2 | Compound 1g | 1.6   | 0.080000 | 1365.145509   | 0.109071    | 36.338      | No     | No     |
| 3 | Compound 1g | 2     | 0.100000 | 1438.295635   | 0.112317    | 12.317      | No     | No     |
| 4 | Compound 1g | 4     | 0.200000 | 3157.245813   | 0.188589    | -5.705      | No     | No     |
| 5 | Compound 1g | 10    | 0.500000 | 8106.260151   | 0.408184    | -18.363     | No     | No     |
| 6 | Compound 1g | 80    | 4.000000 | 90082.883769  | 4.045615    | 1.140       | No     | No     |
| 7 | Compound 1g | 100   | 5.000000 | 112175.124170 | 5.025882    | 0.518       | No     | No     |
| 8 | Compound 1g | 120   | 6.000000 | 133117.079209 | 5.955109    | -0.748      | No     | No     |

Peak Compound 1n

|   | Name        | Level | X Value  | Response      | Calc. Value | % Deviation | Manual | Ignore |
|---|-------------|-------|----------|---------------|-------------|-------------|--------|--------|
| 1 | Compound 1n | 1.2   | 0.060000 | 657.858954    | 0.086170    | 43.616      | No     | No     |
| 2 | Compound 1n | 1.6   | 0.080000 | 872.309723    | 0.097878    | 22.348      | No     | No     |
| 3 | Compound 1n | 2     | 0.100000 | 1130.181323   | 0.111958    | 11.958      | No     | No     |
| 4 | Compound 1n | 4     | 0.200000 | 2752.719131   | 0.200547    | 0.274       | No     | No     |
| 5 | Compound 1n | 10    | 0.500000 | 6691.625978   | 0.415609    | -16.878     | No     | No     |
| 6 | Compound 1n | 80    | 4.000000 | 73828.753068  | 4.081248    | 2.031       | No     | No     |
| 7 | Compound 1n | 100   | 5.000000 | 90044.927543  | 4.966640    | -0.667      | No     | No     |
| 8 | Compound 1n | 120   | 6.000000 | 108603.946820 | 5.979949    | -0.334      | No     | No     |

# Linearity\_CI\_Report

Reported by User: Roman Roxana (roman\_roxana)  
 Acquisition Server: Waters-cd3  
 Project Name: Teste\Thiazides  
 Sample Set Name: Seria Etil\_CI 7 93 LOD LOQ  
 Code column: Inertsil ODS-3 250\*4.6 mm 5um LA140

## SAMPLE INFORMATION

|                   |                      |                     |                                |
|-------------------|----------------------|---------------------|--------------------------------|
| Sample Name:      | Solution 0.06 ug/ mL | Date Acquired:      | 2/11/2023 12:28:03 PM EET      |
| Sample Type:      | Standard             | Acq. Method Set:    | Seria Etil_CI 7 93 LOD LOQ     |
| Vial:             | 10                   | Date Processed:     | 2/13/2023 6:46:03 PM EET       |
| Injection #:      | 1                    | Processing Method:  | Seria Etil_CI 7 93 Linearity   |
| Injection Volume: | 10.00 ul             | Channel Name:       | Extract 275                    |
| Run Time:         | 30.0 Minutes         | Proc. Chnl. Descr.: | 2998 PDA 275.0 nm, Smoothed by |
| Acquired By:      | roman_roxana         |                     |                                |

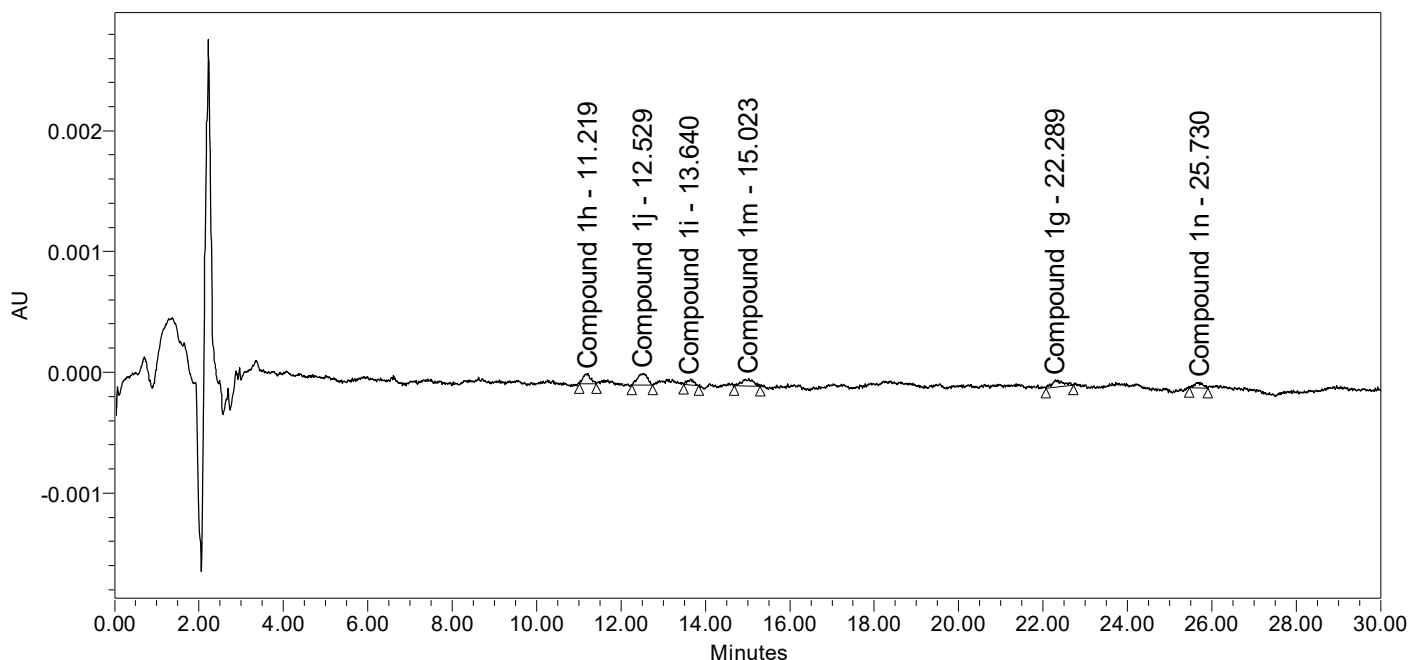

|   | Peak Name   | RT     | Area | Height (μV) | Resolution | Level |
|---|-------------|--------|------|-------------|------------|-------|
| 1 | Compound 1h | 11.219 | 1034 | 83          |            | 1.2   |
| 2 | Compound 1j | 12.529 | 1630 | 100         | 3.45       | 1.2   |
| 3 | Compound 1i | 13.640 | 507  | 46          | 2.60       | 1.2   |
| 4 | Compound 1m | 15.023 | 1178 | 64          | 2.78       | 1.2   |
| 5 | Compound 1g | 22.289 | 1053 | 57          | 14.89      | 1.2   |
| 6 | Compound 1n | 25.730 | 658  | 49          | 9.14       | 1.2   |

# Linearity\_CI\_Report

Reported by User: Roman Roxana (roman\_roxana)  
 Acquisition Server: Waters-cd3  
 Project Name: Teste\Thiazides  
 Sample Set Name: Seria Etil\_CI 7 93 LOD LOQ  
 Code column: Inertsil ODS-3 250\*4.6 mm 5um LA140

## SAMPLE INFORMATION

|                   |                      |                     |                                |
|-------------------|----------------------|---------------------|--------------------------------|
| Sample Name:      | Solution 0.08 ug/ mL | Date Acquired:      | 2/11/2023 12:59:00 PM EET      |
| Sample Type:      | Standard             | Acq. Method Set:    | Seria Etil_CI 7 93 LOD LOQ     |
| Vial:             | 11                   | Date Processed:     | 2/13/2023 6:55:17 PM EET       |
| Injection #:      | 1                    | Processing Method:  | Seria Etil_CI 7 93 Linearity   |
| Injection Volume: | 10.00 ul             | Channel Name:       | Extract 275                    |
| Run Time:         | 30.0 Minutes         | Proc. Chnl. Descr.: | 2998 PDA 275.0 nm, Smoothed by |
| Acquired By:      | roman_roxana         |                     |                                |

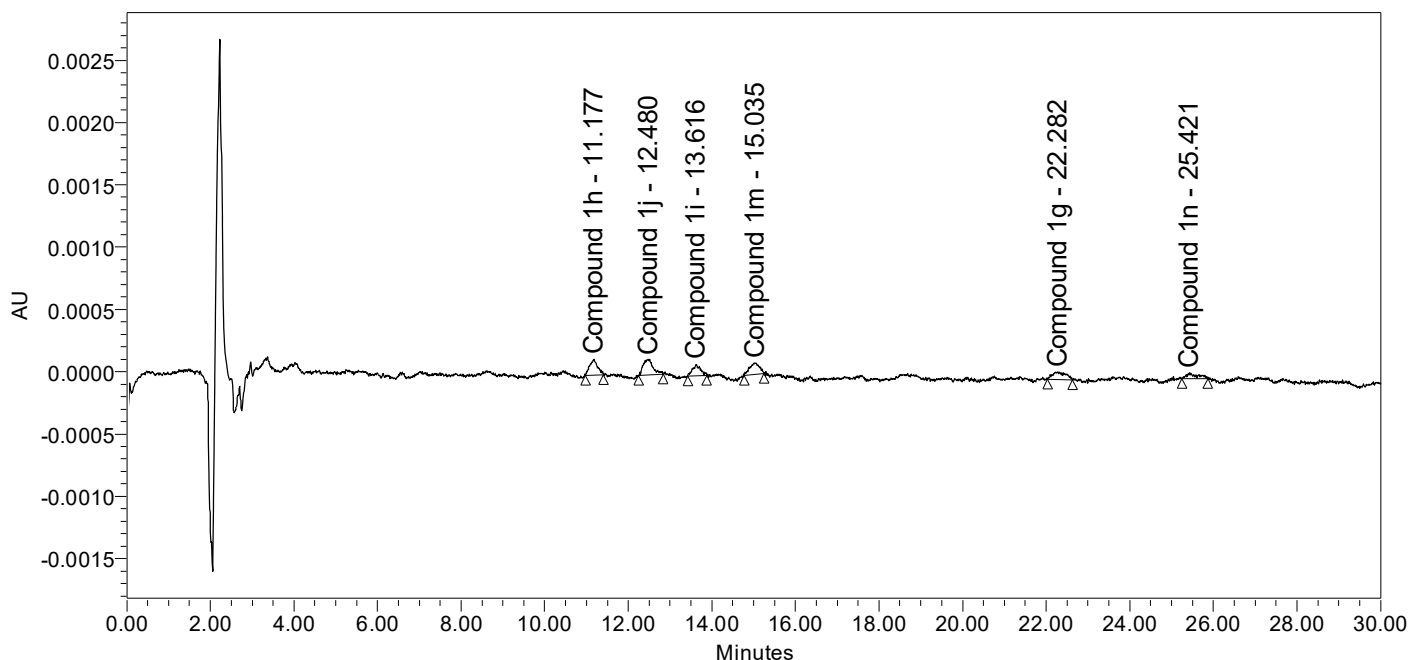

|   | Peak Name   | RT     | Area | Height (μV) | Resolution | Level |
|---|-------------|--------|------|-------------|------------|-------|
| 1 | Compound 1h | 11.177 | 1627 | 126         |            | 1.6   |
| 2 | Compound 1j | 12.480 | 2133 | 125         | 3.46       | 1.6   |
| 3 | Compound 1i | 13.616 | 1180 | 91          | 3.02       | 1.6   |
| 4 | Compound 1m | 15.035 | 1459 | 88          | 3.41       | 1.6   |
| 5 | Compound 1g | 22.282 | 1365 | 60          | 11.63      | 1.6   |
| 6 | Compound 1n | 25.421 | 872  | 46          | 5.61       | 1.6   |

# Linearity\_CI\_Report

Reported by User: Roman Roxana (roman\_roxana)  
 Acquisition Server: Waters-cd3  
 Project Name: Teste\Thiazides  
 Sample Set Name: Seria Etil\_CI 7 93 LOD LOQ  
 Code column: Inertsil ODS-3 250\*4.6 mm 5um LA140

## SAMPLE INFORMATION

|                   |                      |                     |                                |
|-------------------|----------------------|---------------------|--------------------------------|
| Sample Name:      | Solution 0.10 ug/ mL | Date Acquired:      | 2/11/2023 1:29:40 PM EET       |
| Sample Type:      | Standard             | Acq. Method Set:    | Seria Etil_CI 7 93 LOD LOQ     |
| Vial:             | 12                   | Date Processed:     | 2/13/2023 7:00:25 PM EET       |
| Injection #:      | 1                    | Processing Method:  | Seria Etil_CI 7 93 Linearity   |
| Injection Volume: | 10.00 ul             | Channel Name:       | Extract 275                    |
| Run Time:         | 30.0 Minutes         | Proc. Chnl. Descr.: | 2998 PDA 275.0 nm, Smoothed by |
| Acquired By:      | roman_roxana         |                     |                                |

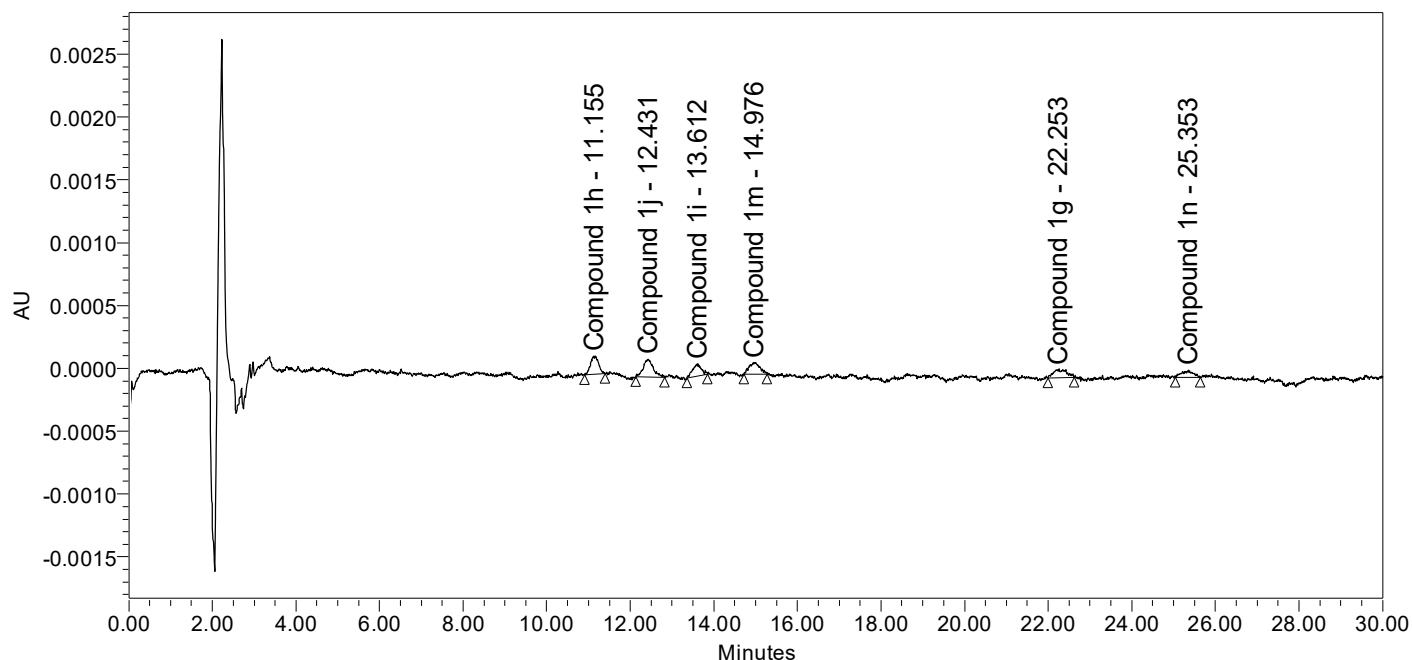

|   | Peak Name   | RT     | Area | Height (μV) | Resolution | Level |
|---|-------------|--------|------|-------------|------------|-------|
| 1 | Compound 1h | 11.155 | 1897 | 144         |            | 2     |
| 2 | Compound 1j | 12.431 | 2500 | 143         | 3.29       | 2     |
| 3 | Compound 1i | 13.612 | 1374 | 95          | 2.95       | 2     |
| 4 | Compound 1m | 14.976 | 1682 | 94          | 3.11       | 2     |
| 5 | Compound 1g | 22.253 | 1438 | 67          | 13.75      | 2     |
| 6 | Compound 1n | 25.353 | 1130 | 59          | 5.75       | 2     |



# Linearity\_CI\_Report

Reported by User: Roman Roxana (roman\_roxana)  
 Acquisition Server: Waters-cd3  
 Project Name: Teste\Thiazides  
 Sample Set Name: Seria Etil\_CI 7 93 LOD LOQ  
 Code column: Inertsil ODS-3 250\*4.6 mm 5um LA140

## SAMPLE INFORMATION

|                   |                      |                     |                                |
|-------------------|----------------------|---------------------|--------------------------------|
| Sample Name:      | Solution 0.20 ug/ mL | Date Acquired:      | 2/11/2023 2:00:20 PM EET       |
| Sample Type:      | Standard             | Acq. Method Set:    | Seria Etil_CI 7 93 LOD LOQ     |
| Vial:             | 13                   | Date Processed:     | 2/13/2023 7:13:36 PM EET       |
| Injection #:      | 1                    | Processing Method:  | Seria Etil_CI 7 93 Linearity   |
| Injection Volume: | 10.00 ul             | Channel Name:       | Extract 275                    |
| Run Time:         | 30.0 Minutes         | Proc. Chnl. Descr.: | 2998 PDA 275.0 nm, Smoothed by |
| Acquired By:      | roman_roxana         |                     |                                |

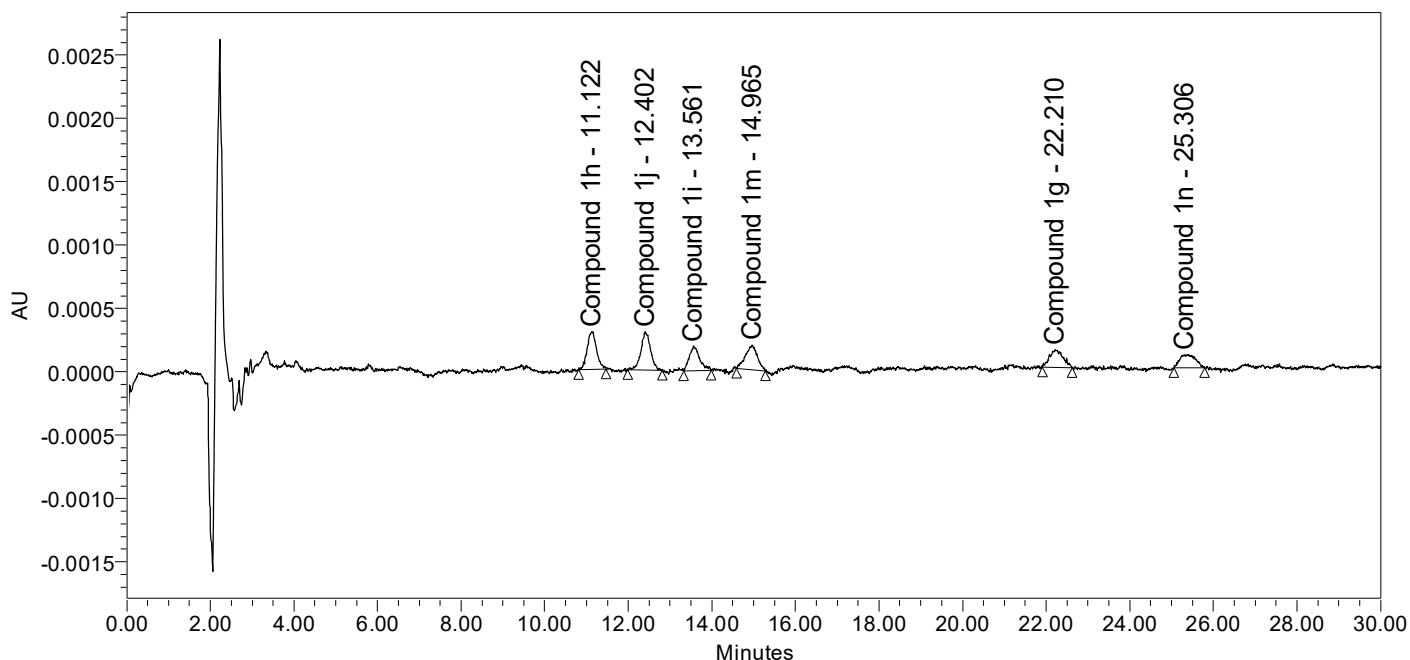

|   | Peak Name   | RT     | Area | Height (μV) | Resolution | Level |
|---|-------------|--------|------|-------------|------------|-------|
| 1 | Compound 1h | 11.122 | 4680 | 297         |            | 4     |
| 2 | Compound 1j | 12.402 | 5007 | 302         | 3.13       | 4     |
| 3 | Compound 1i | 13.561 | 3217 | 192         | 2.76       | 4     |
| 4 | Compound 1m | 14.965 | 3871 | 195         | 2.91       | 4     |
| 5 | Compound 1g | 22.210 | 3157 | 141         | 12.26      | 4     |
| 6 | Compound 1n | 25.306 | 2753 | 103         | 4.42       | 4     |

# Linearity\_CI\_Report

Reported by User: Roman Roxana (roman\_roxana)  
 Acquisition Server: Waters-cd3  
 Project Name: Teste\Thiazides  
 Sample Set Name: Seria Etil\_CI 7 93 LOD LOQ  
 Code column: Inertsil ODS-3 250\*4.6 mm 5um LA140

## SAMPLE INFORMATION

|                   |                      |                     |                                |
|-------------------|----------------------|---------------------|--------------------------------|
| Sample Name:      | Solution 0.50 ug/ mL | Date Acquired:      | 2/11/2023 11:52:09 AM EET      |
| Sample Type:      | Standard             | Acq. Method Set:    | Seria Etil_CI 7 93 LOD LOQ     |
| Vial:             | 14                   | Date Processed:     | 2/13/2023 7:21:05 PM EET       |
| Injection #:      | 1                    | Processing Method:  | Seria Etil_CI 7 93 Linearity   |
| Injection Volume: | 10.00 ul             | Channel Name:       | Extract 275                    |
| Run Time:         | 40.0 Minutes         | Proc. Chnl. Descr.: | 2998 PDA 275.0 nm, Smoothed by |
| Acquired By:      | roman_roxana         |                     |                                |

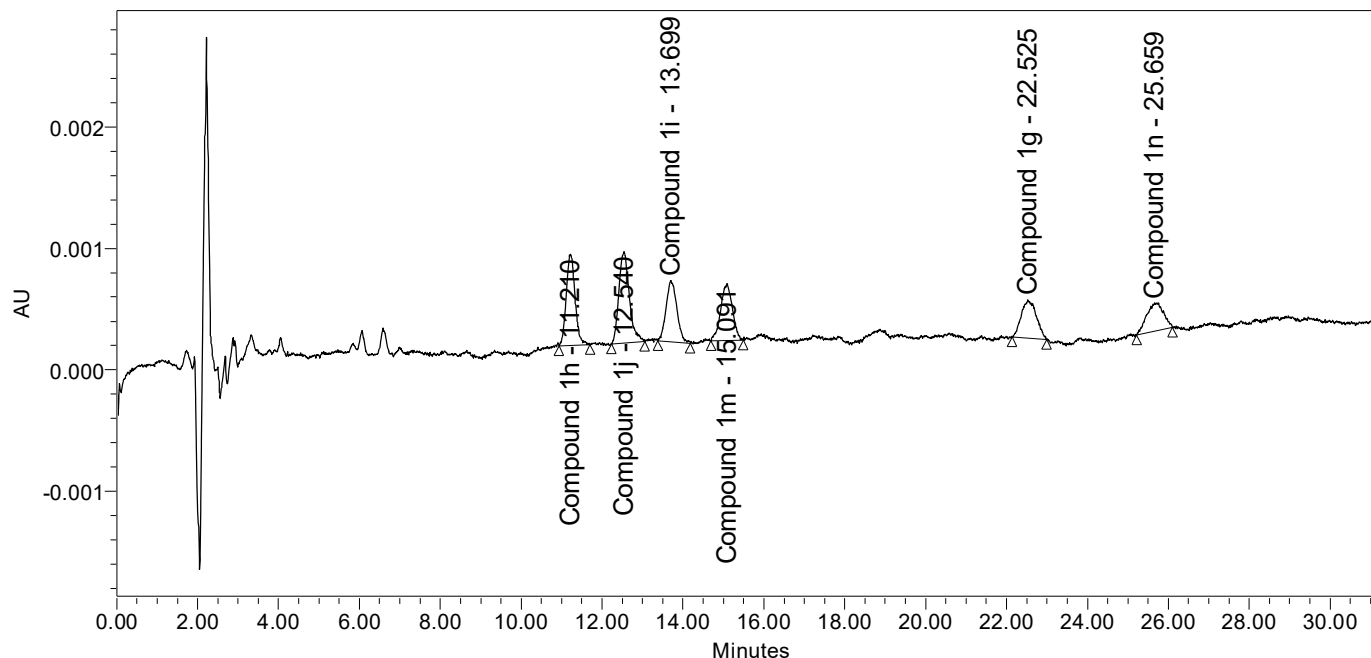

|   | Peak Name   | RT     | Area  | Height (µV) | Resolution | Level |
|---|-------------|--------|-------|-------------|------------|-------|
| 1 | Compound 1h | 11.210 | 11488 | 754         |            | 10    |
| 2 | Compound 1j | 12.540 | 13394 | 751         | 3.12       | 10    |
| 3 | Compound 1i | 13.699 | 9171  | 500         | 2.46       | 10    |
| 4 | Compound 1m | 15.091 | 9300  | 466         | 2.75       | 10    |
| 5 | Compound 1g | 22.525 | 8106  | 315         | 11.98      | 10    |
| 6 | Compound 1n | 25.659 | 6692  | 230         | 4.01       | 10    |

# Linearity\_CI\_Report

Reported by User: Roman Roxana (roman\_roxana)  
 Acquisition Server: Waters-cd3  
 Project Name: Teste\Thiazides  
 Sample Set Name: Seria Etil\_CI 7 93 Linearity  
 Code column: Inertsil ODS-3 250\*4.6 mm 5um LA140

## SAMPLE INFORMATION

|                   |                     |                     |                                |
|-------------------|---------------------|---------------------|--------------------------------|
| Sample Name:      | Solution 4.0 ug/ mL | Date Acquired:      | 2/11/2023 3:30:17 PM EET       |
| Sample Type:      | Standard            | Acq. Method Set:    | Seria Etil_CI 7 93 Linearity   |
| Vial:             | 25                  | Date Processed:     | 2/13/2023 7:23:22 PM EET       |
| Injection #:      | 1                   | Processing Method:  | Seria Etil_CI 7 93 Linearity   |
| Injection Volume: | 10.00 ul            | Channel Name:       | Extract 275                    |
| Run Time:         | 30.0 Minutes        | Proc. Chnl. Descr.: | 2998 PDA 275.0 nm, Smoothed by |
| Acquired By:      | roman_roxana        |                     |                                |

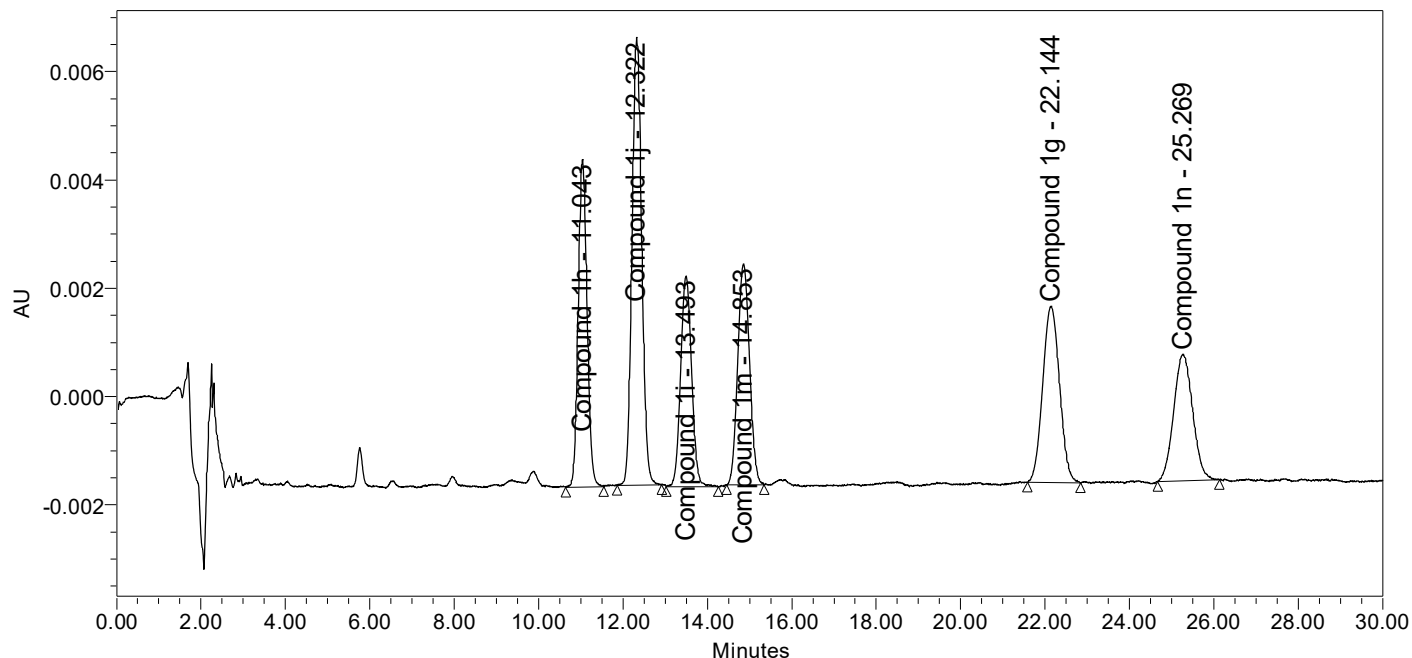

|   | Peak Name   | RT     | Area   | Height (μV) | Resolution | Level |
|---|-------------|--------|--------|-------------|------------|-------|
| 1 | Compound 1h | 11.043 | 89436  | 6043        |            | 80    |
| 2 | Compound 1j | 12.322 | 135007 | 8269        | 3.13       | 80    |
| 3 | Compound 1i | 13.493 | 69752  | 3880        | 2.60       | 80    |
| 4 | Compound 1m | 14.853 | 78851  | 4080        | 2.76       | 80    |
| 5 | Compound 1g | 22.144 | 90083  | 3249        | 11.65      | 80    |
| 6 | Compound 1n | 25.269 | 73829  | 2333        | 3.98       | 80    |

# Linearity\_CI\_Report

Reported by User: Roman Roxana (roman\_roxana)  
 Acquisition Server: Waters-cd3  
 Project Name: Teste\Thiazides  
 Sample Set Name: Seria Etil\_CI 7 93 Linearity  
 Code column: Inertsil ODS-3 250\*4.6 mm 5um LA140

## SAMPLE INFORMATION

|                   |                     |                     |                                |
|-------------------|---------------------|---------------------|--------------------------------|
| Sample Name:      | Solution 5.0 ug/ mL | Date Acquired:      | 2/11/2023 4:01:13 PM EET       |
| Sample Type:      | Standard            | Acq. Method Set:    | Seria Etil_CI 7 93 Linearity   |
| Vial:             | 26                  | Date Processed:     | 2/13/2023 7:25:37 PM EET       |
| Injection #:      | 1                   | Processing Method:  | Seria Etil_CI 7 93 Linearity   |
| Injection Volume: | 10.00 ul            | Channel Name:       | Extract 275                    |
| Run Time:         | 30.0 Minutes        | Proc. Chnl. Descr.: | 2998 PDA 275.0 nm, Smoothed by |
| Acquired By:      | roman_roxana        |                     |                                |

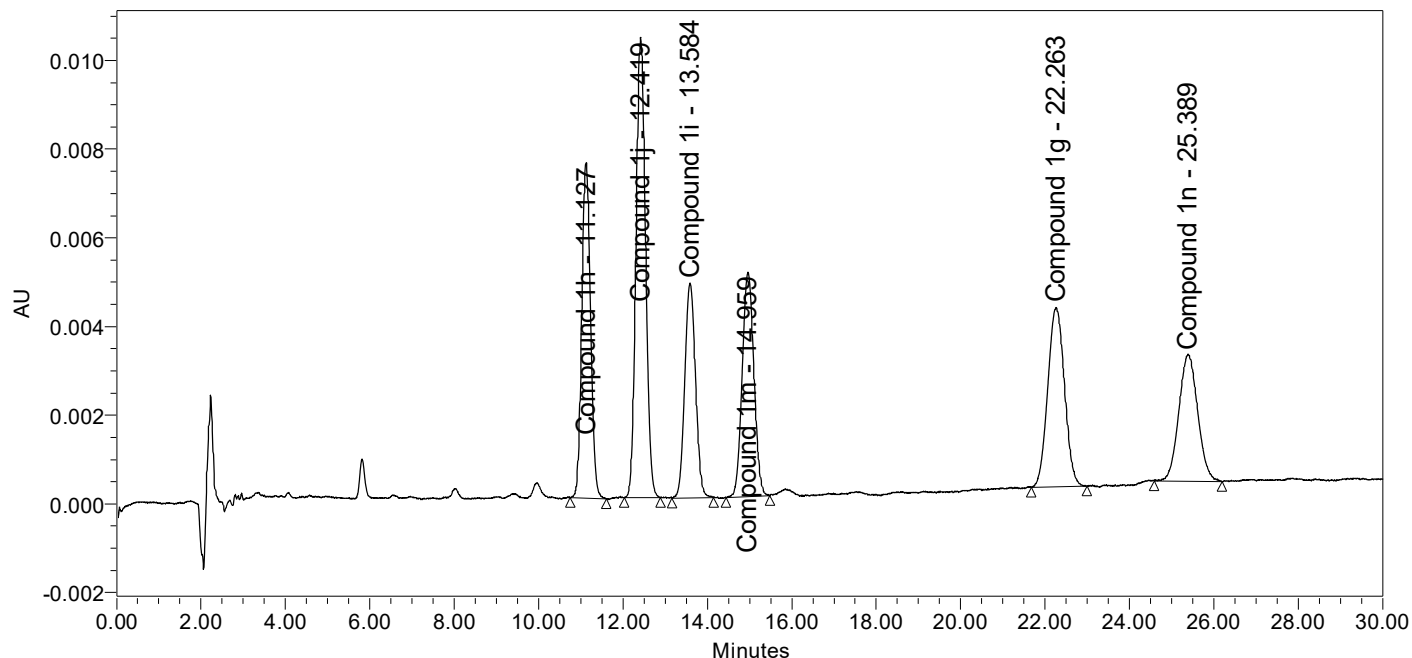

|   | Peak Name   | RT     | Area   | Height (μV) | Resolution | Level |
|---|-------------|--------|--------|-------------|------------|-------|
| 1 | Compound 1h | 11.127 | 110698 | 7565        |            | 100   |
| 2 | Compound 1j | 12.419 | 166926 | 10382       | 3.17       | 100   |
| 3 | Compound 1i | 13.584 | 85573  | 4842        | 2.61       | 100   |
| 4 | Compound 1m | 14.959 | 97456  | 5062        | 2.81       | 100   |
| 5 | Compound 1g | 22.263 | 112175 | 4052        | 11.70      | 100   |
| 6 | Compound 1n | 25.389 | 90045  | 2855        | 3.96       | 100   |

# Linearity\_CI\_Report

Reported by User: Roman Roxana (roman\_roxana)  
 Acquisition Server: Waters-cd3  
 Project Name: Teste\Thiazides  
 Sample Set Name: Seria Etil\_CI 7 93 Linearity  
 Code column: Inertsil ODS-3 250\*4.6 mm 5um LA140

## SAMPLE INFORMATION

|                   |                     |                     |                                |
|-------------------|---------------------|---------------------|--------------------------------|
| Sample Name:      | Solution 6.0 ug/ mL | Date Acquired:      | 2/11/2023 4:32:08 PM EET       |
| Sample Type:      | Standard            | Acq. Method Set:    | Seria Etil_CI 7 93 Linearity   |
| Vial:             | 27                  | Date Processed:     | 2/13/2023 7:27:26 PM EET       |
| Injection #:      | 1                   | Processing Method:  | Seria Etil_CI 7 93 Linearity   |
| Injection Volume: | 10.00 ul            | Channel Name:       | Extract 275                    |
| Run Time:         | 30.0 Minutes        | Proc. Chnl. Descr.: | 2998 PDA 275.0 nm, Smoothed by |
| Acquired By:      | roman_roxana        |                     |                                |

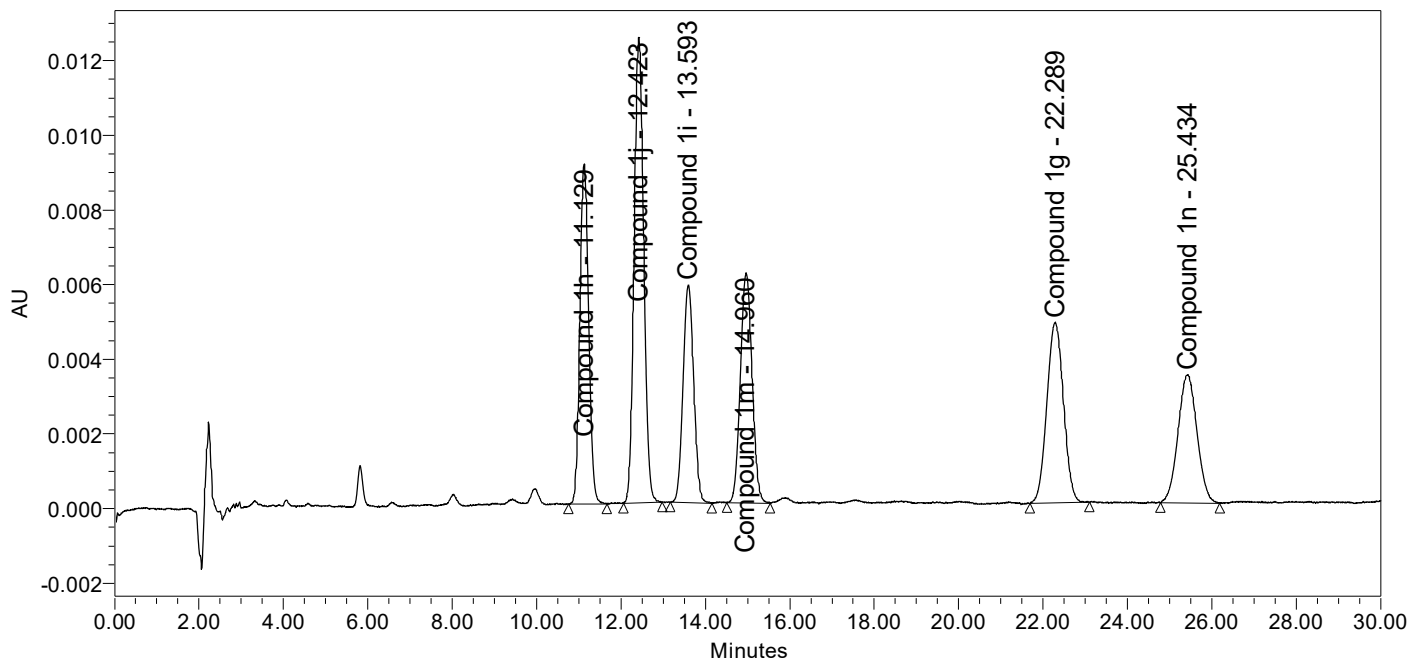

|   | Peak Name   | RT     | Area   | Height (μV) | Resolution | Level |
|---|-------------|--------|--------|-------------|------------|-------|
| 1 | Compound 1h | 11.129 | 133370 | 9103        |            | 120   |
| 2 | Compound 1j | 12.423 | 200966 | 12469       | 3.18       | 120   |
| 3 | Compound 1i | 13.593 | 102149 | 5837        | 2.63       | 120   |
| 4 | Compound 1m | 14.960 | 118926 | 6159        | 2.81       | 120   |
| 5 | Compound 1g | 22.289 | 133117 | 4835        | 11.80      | 120   |
| 6 | Compound 1n | 25.434 | 108604 | 3435        | 4.00       | 120   |

**Quantitative determination of**  
***compounds 1g, 1h, 1i, 1j, 1m, 1n***  
**- Validation of the analytical method -**

Validation parameters:

- Specificity
- Precision 1
- Precision 2
- LOD – LOQ
- Linearity
- Range
- **Accuracy**
- Robustness

# Chloride\_Ethyl\_Accuracy

Reported by User: Roman Roxana (roman\_roxana)  
 Acquisition Server: Waters-cd3  
 Project Name: Teste\Thiazides  
 Sample Set Name: Seria Etil\_Cl 7 93 Accuracy  
 Code column: Inertsil ODS-3 250\*4.6 mm 5um LA140

## SAMPLE INFORMATION

|                   |                     |                     |                             |
|-------------------|---------------------|---------------------|-----------------------------|
| Sample Name:      | Solution 5.0 ug/ mL | Date Acquired:      | 2/11/2023 5:18:21 PM EET    |
| Sample Type:      | Standard            | Acq. Method Set:    | Seria Etil_Cl 7 93 Accuracy |
| Vial:             | 1                   | Date Processed:     | 4/19/2023 1:39:07 PM EEST   |
| Injection #:      | 1                   | Processing Method:  | Seria Etil_Cl 7 93 Accuracy |
| Injection Volume: | 10.00 ul            | Channel Name:       | Extract 275                 |
| Run Time:         | 35.0 Minutes        | Proc. Chnl. Descr.: | 2998 PDA 275.0 nm (2998)    |
| Acquired By:      | roman_roxana        |                     |                             |

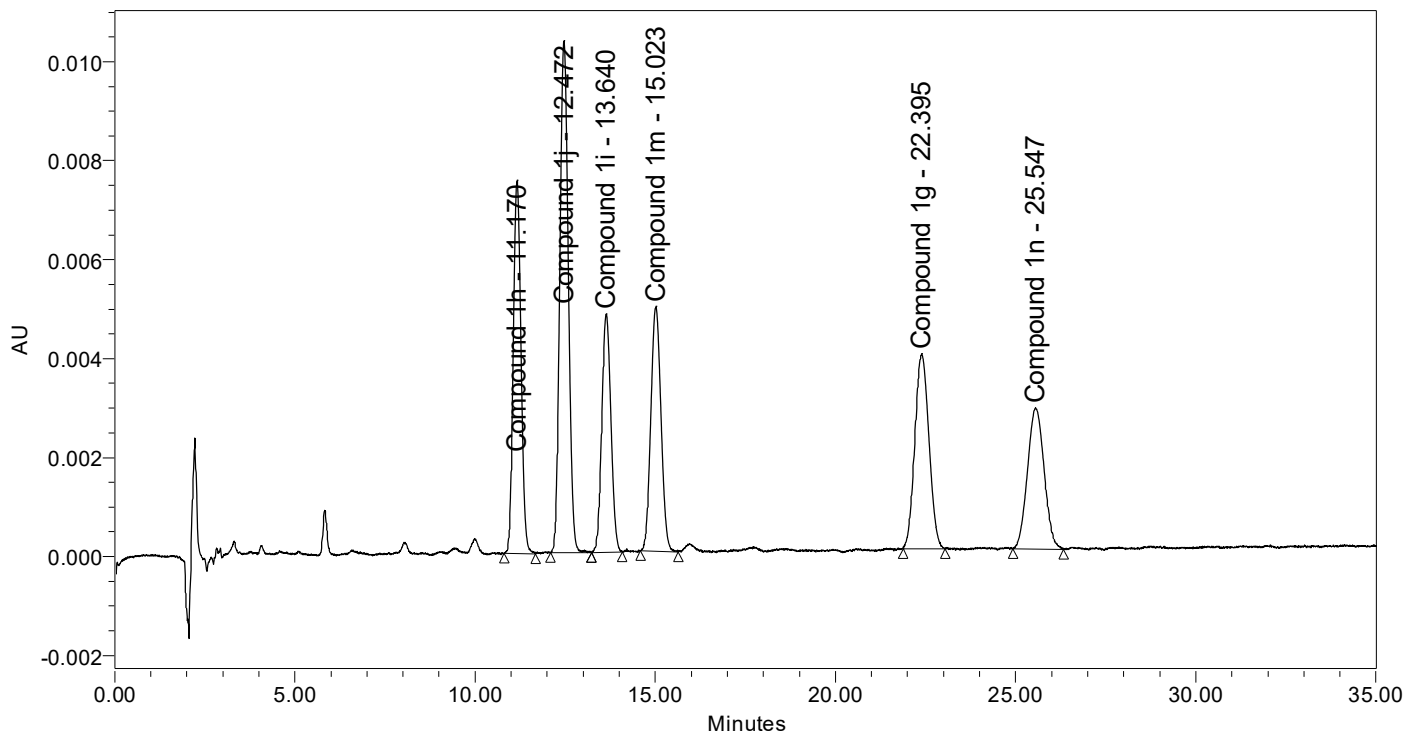

|   | Peak Name   | RT     | Area   | Height (μV) | Resolution |
|---|-------------|--------|--------|-------------|------------|
| 1 | Compound 1h | 11.170 | 111264 | 7545        |            |
| 2 | Compound 1j | 12.472 | 168093 | 10349       | 3.18       |
| 3 | Compound 1i | 13.640 | 84696  | 4822        | 2.61       |
| 4 | Compound 1m | 15.023 | 96091  | 4950        | 2.82       |
| 5 | Compound 1g | 22.395 | 108286 | 3943        | 11.78      |

|   | Peak Name   | RT     | Area  | Height (μV) | Resolution |
|---|-------------|--------|-------|-------------|------------|
| 6 | Compound 1n | 25.547 | 90633 | 2849        | 4.00       |

# Chloride\_Ethyl\_Accuracy

Reported by User: Roman Roxana (roman\_roxana)  
 Acquisition Server: Waters-cd3  
 Project Name: Teste\Thiazides  
 Sample Set Name: Seria Etil\_Cl 7 93 Accuracy  
 Code column: Inertsil ODS-3 250\*4.6 mm 5um LA140

## SAMPLE INFORMATION

|                   |                     |                     |                             |
|-------------------|---------------------|---------------------|-----------------------------|
| Sample Name:      | Solution 5.0 ug/ mL | Date Acquired:      | 2/11/2023 5:53:59 PM EET    |
| Sample Type:      | Standard            | Acq. Method Set:    | Seria Etil_Cl 7 93 Accuracy |
| Vial:             | 1                   | Date Processed:     | 4/19/2023 1:39:23 PM EEST   |
| Injection #:      | 2                   | Processing Method:  | Seria Etil_Cl 7 93 Accuracy |
| Injection Volume: | 10.00 ul            | Channel Name:       | Extract 275                 |
| Run Time:         | 35.0 Minutes        | Proc. Chnl. Descr.: | 2998 PDA 275.0 nm (2998)    |
| Acquired By:      | roman_roxana        |                     |                             |

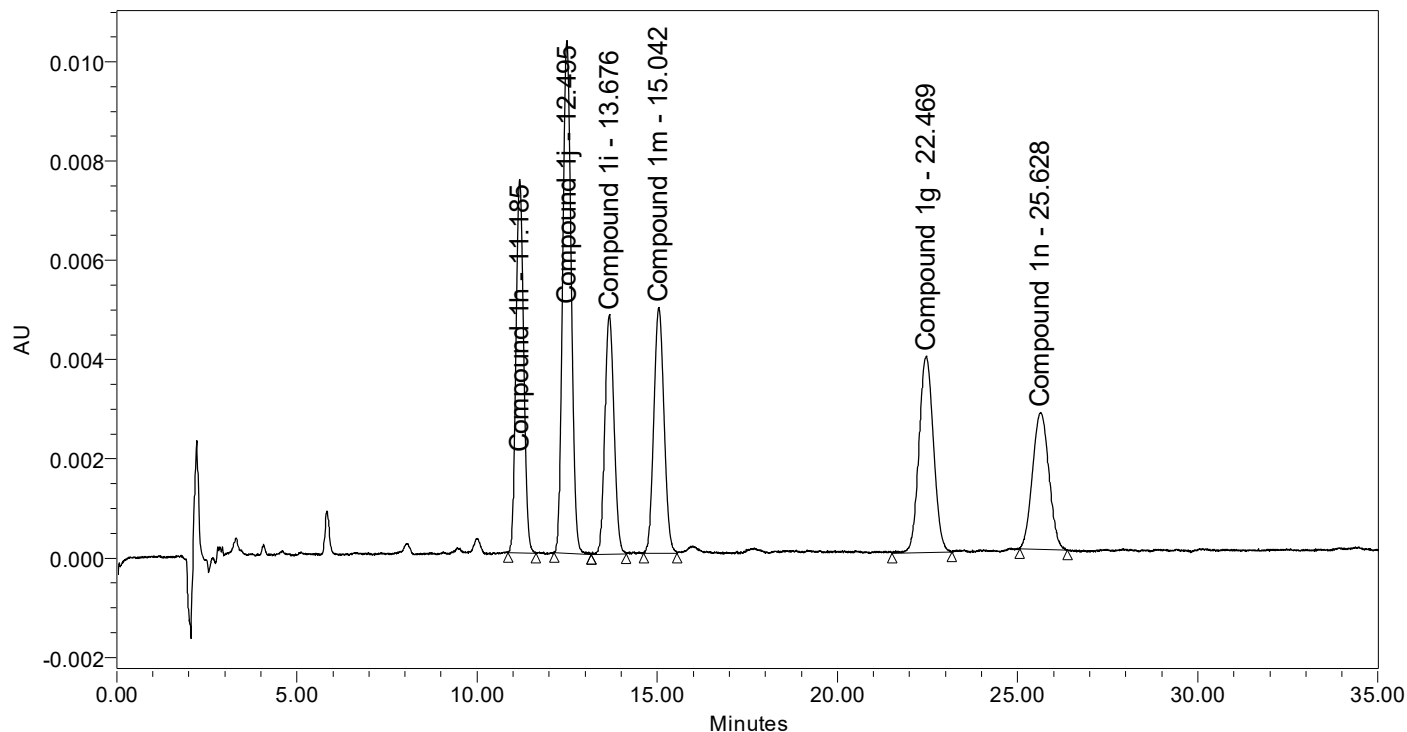

|   | Peak Name   | RT     | Area   | Height (μV) | Resolution |
|---|-------------|--------|--------|-------------|------------|
| 1 | Compound 1h | 11.185 | 110378 | 7518        |            |
| 2 | Compound 1j | 12.495 | 167763 | 10330       | 3.20       |
| 3 | Compound 1i | 13.676 | 85020  | 4820        | 2.63       |
| 4 | Compound 1m | 15.042 | 96322  | 4952        | 2.78       |
| 5 | Compound 1g | 22.469 | 110962 | 3958        | 11.81      |

|   | Peak Name   | RT     | Area  | Height (μV) | Resolution |
|---|-------------|--------|-------|-------------|------------|
| 6 | Compound 1n | 25.628 | 87515 | 2768        | 3.97       |



# Chloride\_Ethyl\_Accuracy

Reported by User: Roman Roxana (roman\_roxana)  
 Acquisition Server: Waters-cd3  
 Project Name: Teste\Thiazides  
 Sample Set Name: Seria Etil\_Cl 7 93 Accuracy  
 Code column: Inertsil ODS-3 250\*4.6 mm 5um LA140

## SAMPLE INFORMATION

|                   |                     |                     |                             |
|-------------------|---------------------|---------------------|-----------------------------|
| Sample Name:      | Solution 5.0 ug/ mL | Date Acquired:      | 2/11/2023 6:29:37 PM EET    |
| Sample Type:      | Standard            | Acq. Method Set:    | Seria Etil_Cl 7 93 Accuracy |
| Vial:             | 1                   | Date Processed:     | 4/19/2023 1:39:25 PM EEST   |
| Injection #:      | 3                   | Processing Method:  | Seria Etil_Cl 7 93 Accuracy |
| Injection Volume: | 10.00 ul            | Channel Name:       | Extract 275                 |
| Run Time:         | 35.0 Minutes        | Proc. Chnl. Descr.: | 2998 PDA 275.0 nm (2998)    |
| Acquired By:      | roman_roxana        |                     |                             |

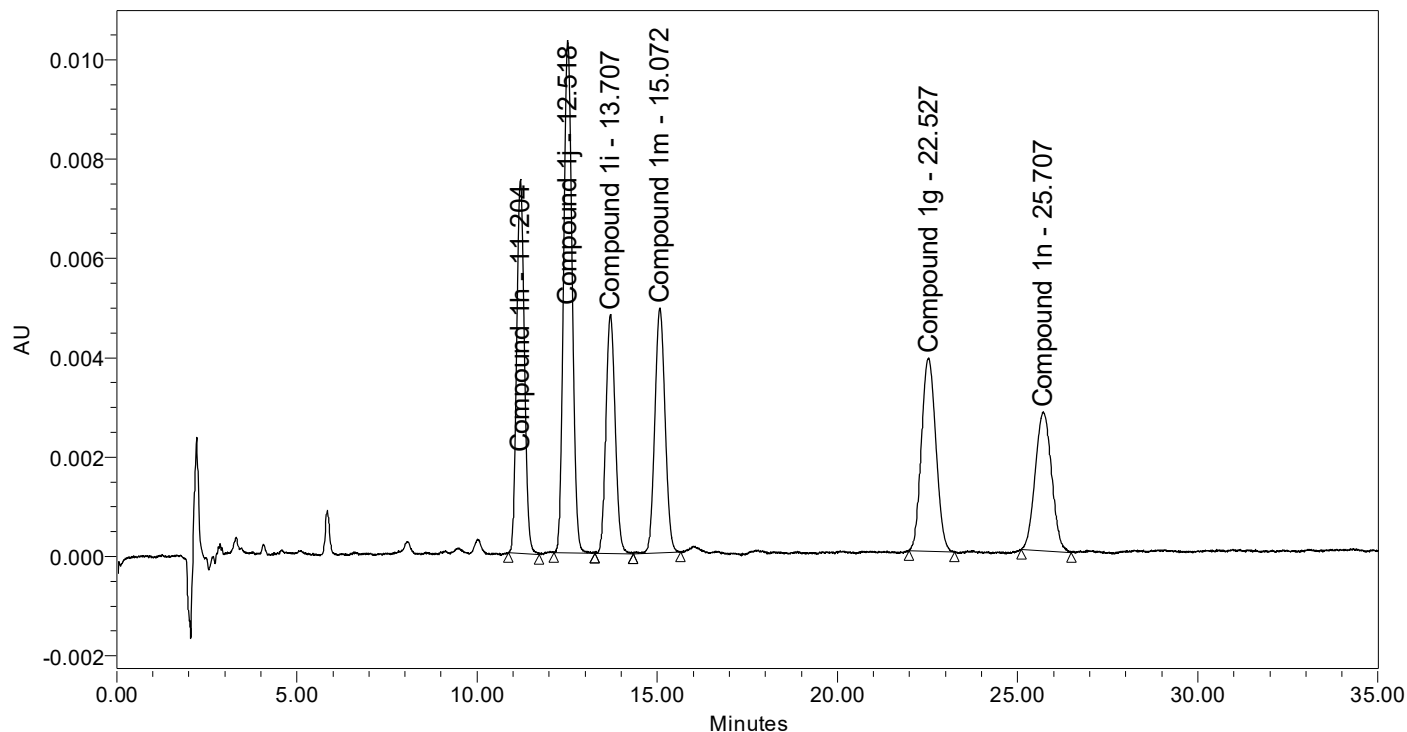

|   | Peak Name   | RT     | Area   | Height (μV) | Resolution |
|---|-------------|--------|--------|-------------|------------|
| 1 | Compound 1h | 11.204 | 111083 | 7520        |            |
| 2 | Compound 1j | 12.518 | 167826 | 10310       | 3.21       |
| 3 | Compound 1i | 13.707 | 85713  | 4810        | 2.65       |
| 4 | Compound 1m | 15.072 | 96276  | 4927        | 2.78       |
| 5 | Compound 1g | 22.527 | 108186 | 3894        | 11.86      |

|   | Peak Name   | RT     | Area  | Height (μV) | Resolution |
|---|-------------|--------|-------|-------------|------------|
| 6 | Compound 1n | 25.707 | 88689 | 2796        | 4.00       |

## Component Summary Area Time

Reported by User: Roman Roxana (roman\_roxana)  
 Acquisition Server: Waters-cd3  
 Project Name: Teste\Thiazides  
 Sample Set Name: Seria Etil\_CI 7 93 Accuracy  
 Code column: Inertsil ODS-3 250\*4.6 mm 5 um LA140

### Retention Time Summarized by Name Channel: 2998

|           | SampleName          | Inj | Channel | Vial | Compound 1h | Compound 1j | Compound 1i | Compound 1m |
|-----------|---------------------|-----|---------|------|-------------|-------------|-------------|-------------|
| 1         | Solution 5.0 ug/ mL | 1   | 2998    | 1    | 11.170      | 12.472      | 13.640      | 15.023      |
| 2         | Solution 5.0 ug/ mL | 2   | 2998    | 1    | 11.185      | 12.495      | 13.676      | 15.042      |
| 3         | Solution 5.0 ug/ mL | 3   | 2998    | 1    | 11.204      | 12.518      | 13.707      | 15.072      |
| Mean      |                     |     |         |      | 11.187      | 12.495      | 13.674      | 15.046      |
| Std. Dev. |                     |     |         |      | 0.017       | 0.023       | 0.033       | 0.025       |
| % RSD     |                     |     |         |      | 0.15        | 0.18        | 0.24        | 0.16        |

### Retention Time Summarized by Name Channel: 2998

|           | Compound 1g | Compound 1n |
|-----------|-------------|-------------|
| 1         | 22.395      | 25.547      |
| 2         | 22.469      | 25.628      |
| 3         | 22.527      | 25.707      |
| Mean      | 22.464      | 25.627      |
| Std. Dev. | 0.066       | 0.080       |
| % RSD     | 0.30        | 0.31        |

## Component Summary Area Time

Reported by User: Roman Roxana (roman\_roxana)  
 Acquisition Server: Waters-cd3  
 Project Name: Teste\Thiazides  
 Sample Set Name: Seria Etil\_Cl 7 93 Accuracy  
 Code column: Inertsil ODS-3 250\*4.6 mm 5 um LA140

### Area Summarized by Name Channel: 2998

|           | SampleName          | Inj | Channel | Vial | Compound 1h | Compound 1j | Compound 1i | Compound 1m |
|-----------|---------------------|-----|---------|------|-------------|-------------|-------------|-------------|
| 1         | Solution 5.0 ug/ mL | 1   | 2998    | 1    | 111264      | 168093      | 84696       | 96091       |
| 2         | Solution 5.0 ug/ mL | 2   | 2998    | 1    | 110378      | 167763      | 85020       | 96322       |
| 3         | Solution 5.0 ug/ mL | 3   | 2998    | 1    | 111083      | 167826      | 85713       | 96276       |
| Mean      |                     |     |         |      | 110908      | 167894      | 85143       | 96230       |
| Std. Dev. |                     |     |         |      | 468         | 175         | 520         | 122         |
| % RSD     |                     |     |         |      | 0.42        | 0.10        | 0.61        | 0.13        |

### Area Summarized by Name Channel: 2998

|           | Compound 1g | Compound 1n |
|-----------|-------------|-------------|
| 1         | 108286      | 90633       |
| 2         | 110962      | 87515       |
| 3         | 108186      | 88689       |
| Mean      | 109145      | 88945       |
| Std. Dev. | 1575        | 1575        |
| % RSD     | 1.44        | 1.77        |

# Chloride\_Ethyl\_Accuracy

Reported by User: Roman Roxana (roman\_roxana)  
 Acquisition Server: Waters-cd3  
 Project Name: Teste\Thiazides  
 Sample Set Name: Seria Etil\_Cl 7 93 Accuracy  
 Code column: Inertsil ODS-3 250\*4.6 mm 5um LA140

## SAMPLE INFORMATION

|                   |                     |                     |                             |
|-------------------|---------------------|---------------------|-----------------------------|
| Sample Name:      | Solution 4.0 ug/ mL | Date Acquired:      | 2/11/2023 7:20:15 PM EET    |
| Sample Type:      | Unknown             | Acq. Method Set:    | Seria Etil_Cl 7 93 Accuracy |
| Vial:             | 2                   | Date Processed:     | 4/19/2023 2:16:58 PM EEST   |
| Injection #:      | 1                   | Processing Method:  | Seria Etil_Cl 7 93 Accuracy |
| Injection Volume: | 10.00 ul            | Channel Name:       | Extract 275                 |
| Run Time:         | 35.0 Minutes        | Proc. Chnl. Descr.: | 2998 PDA 275.0 nm (2998)    |
| Acquired By:      | roman_roxana        |                     |                             |

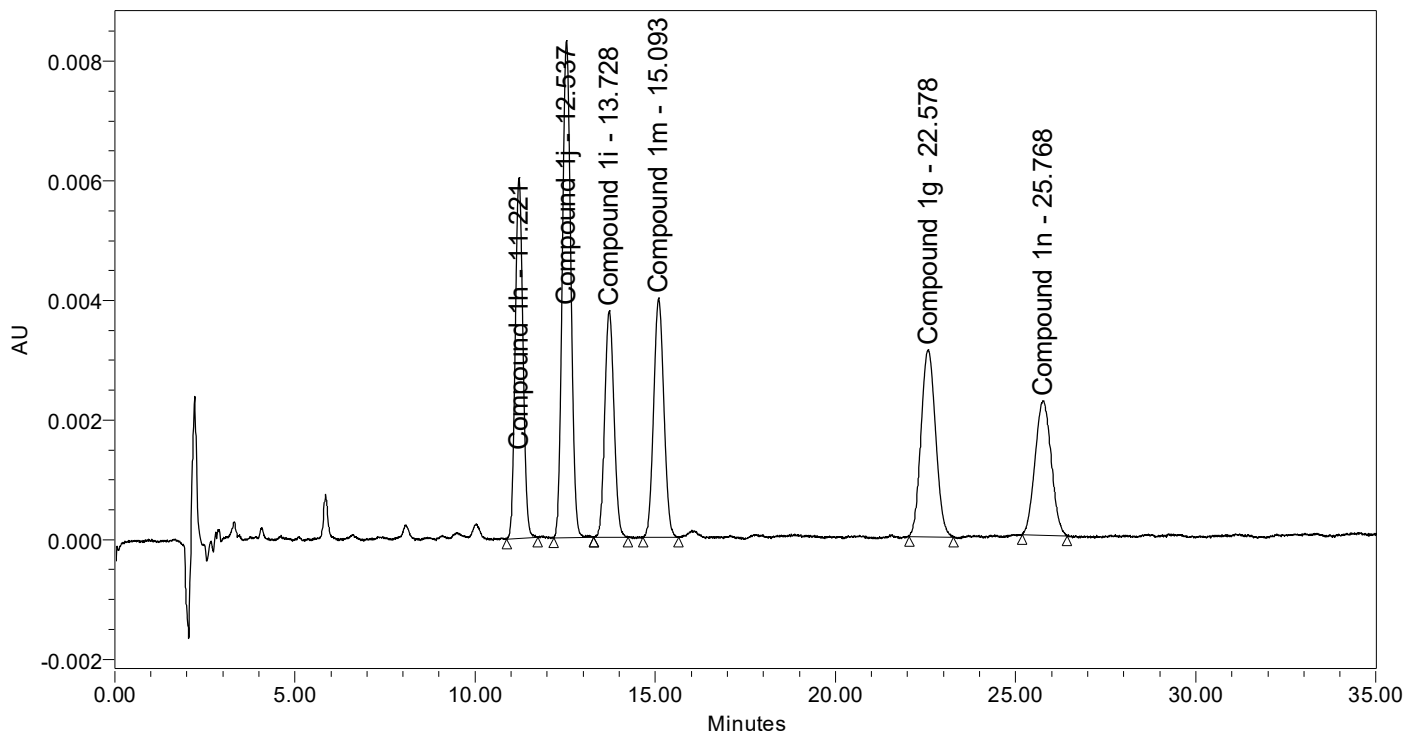

|   | Peak Name   | RT     | Area   | Height (μV) | Resolution |
|---|-------------|--------|--------|-------------|------------|
| 1 | Compound 1h | 11.221 | 88596  | 6037        |            |
| 2 | Compound 1j | 12.537 | 134788 | 8308        | 3.23       |
| 3 | Compound 1i | 13.728 | 66935  | 3788        | 2.65       |
| 4 | Compound 1m | 15.093 | 77870  | 4006        | 2.78       |
| 5 | Compound 1g | 22.578 | 87506  | 3130        | 11.91      |

|   | Peak Name   | RT     | Area  | Height (μV) | Resolution |
|---|-------------|--------|-------|-------------|------------|
| 6 | Compound 1n | 25.768 | 70454 | 2248        | 4.02       |

# Chloride\_Ethyl\_Accuracy

Reported by User: Roman Roxana (roman\_roxana)  
 Acquisition Server: Waters-cd3  
 Project Name: Teste\Thiazides  
 Sample Set Name: Seria Etil\_Cl 7 93 Accuracy  
 Code column: Inertsil ODS-3 250\*4.6 mm 5um LA140

## SAMPLE INFORMATION

|                   |                     |                     |                             |
|-------------------|---------------------|---------------------|-----------------------------|
| Sample Name:      | Solution 4.0 ug/ mL | Date Acquired:      | 2/11/2023 7:55:54 PM EET    |
| Sample Type:      | Unknown             | Acq. Method Set:    | Seria Etil_Cl 7 93 Accuracy |
| Vial:             | 3                   | Date Processed:     | 4/19/2023 1:42:12 PM EEST   |
| Injection #:      | 1                   | Processing Method:  | Seria Etil_Cl 7 93 Accuracy |
| Injection Volume: | 10.00 ul            | Channel Name:       | Extract 275                 |
| Run Time:         | 35.0 Minutes        | Proc. Chnl. Descr.: | 2998 PDA 275.0 nm (2998)    |
| Acquired By:      | roman_roxana        |                     |                             |

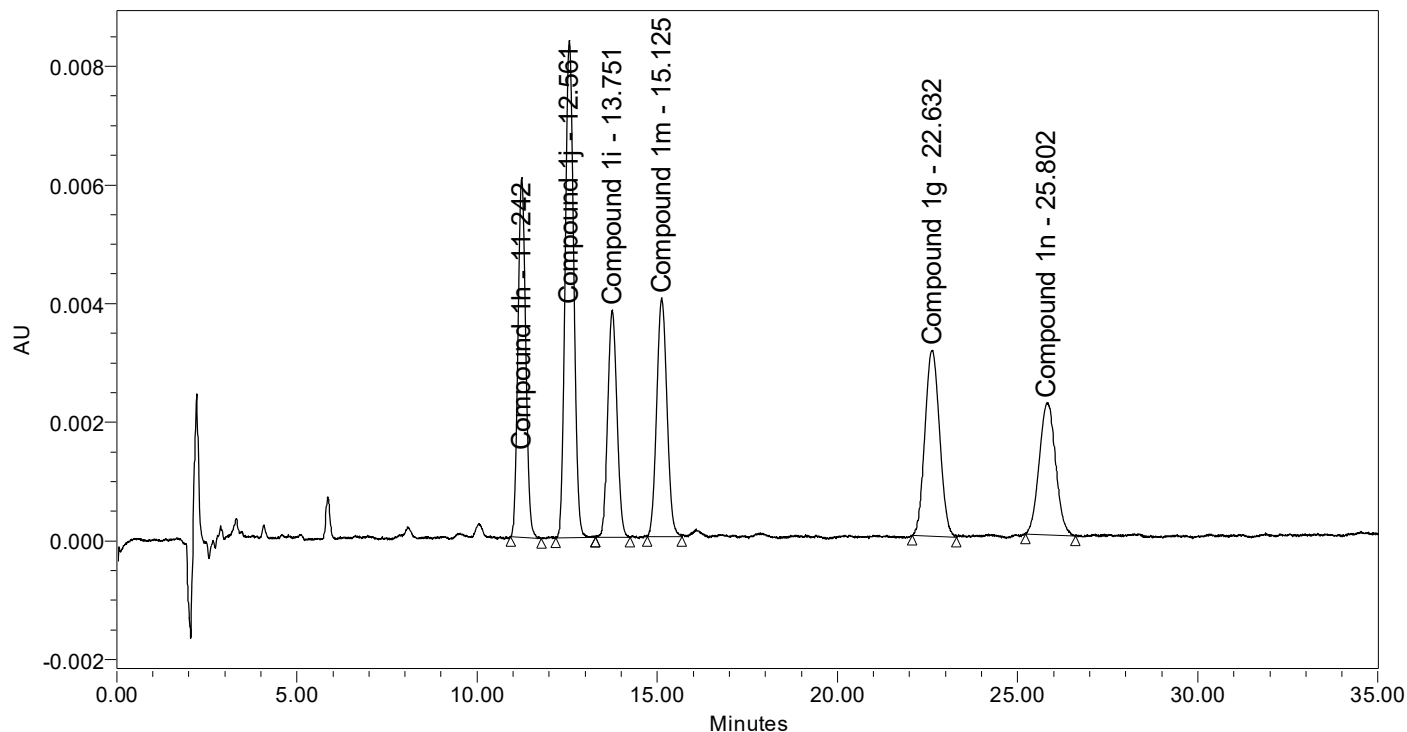

|   | Peak Name   | RT     | Area   | Height (μV) | Resolution |
|---|-------------|--------|--------|-------------|------------|
| 1 | Compound 1h | 11.242 | 89424  | 6068        |            |
| 2 | Compound 1j | 12.561 | 136160 | 8381        | 3.23       |
| 3 | Compound 1i | 13.751 | 67660  | 3831        | 2.65       |
| 4 | Compound 1m | 15.125 | 78492  | 4020        | 2.79       |
| 5 | Compound 1g | 22.632 | 88169  | 3138        | 11.88      |

|   | Peak Name   | RT     | Area  | Height (μV) | Resolution |
|---|-------------|--------|-------|-------------|------------|
| 6 | Compound 1n | 25.802 | 70865 | 2225        | 3.97       |

# Chloride\_Ethyl\_Accuracy

Reported by User: Roman Roxana (roman\_roxana)  
 Acquisition Server: Waters-cd3  
 Project Name: Teste\Thiazides  
 Sample Set Name: Seria Etil\_Cl 7 93 Accuracy  
 Code column: Inertsil ODS-3 250\*4.6 mm 5um LA140

## SAMPLE INFORMATION

|                   |                     |                     |                             |
|-------------------|---------------------|---------------------|-----------------------------|
| Sample Name:      | Solution 4.0 ug/ mL | Date Acquired:      | 2/11/2023 8:31:35 PM EET    |
| Sample Type:      | Unknown             | Acq. Method Set:    | Seria Etil_Cl 7 93 Accuracy |
| Vial:             | 4                   | Date Processed:     | 4/19/2023 2:04:12 PM EEST   |
| Injection #:      | 1                   | Processing Method:  | Seria Etil_Cl 7 93 Accuracy |
| Injection Volume: | 10.00 ul            | Channel Name:       | Extract 275                 |
| Run Time:         | 35.0 Minutes        | Proc. Chnl. Descr.: | 2998 PDA 275.0 nm (2998)    |
| Acquired By:      | roman_roxana        |                     |                             |

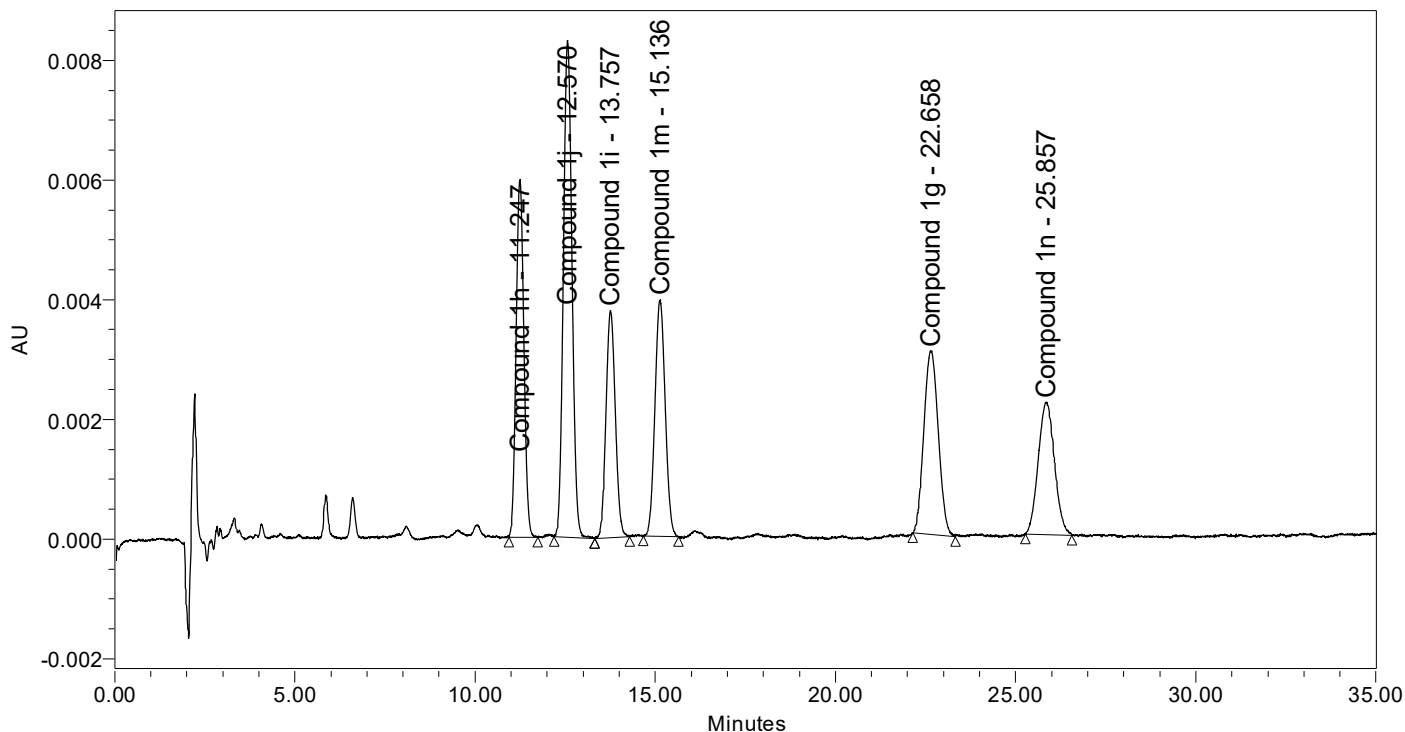

|   | Peak Name   | RT     | Area   | Height (μV) | Resolution |
|---|-------------|--------|--------|-------------|------------|
| 1 | Compound 1h | 11.247 | 88261  | 5984        |            |
| 2 | Compound 1j | 12.570 | 135576 | 8295        | 3.22       |
| 3 | Compound 1i | 13.757 | 67434  | 3792        | 2.63       |
| 4 | Compound 1m | 15.136 | 77528  | 3961        | 2.80       |
| 5 | Compound 1g | 22.658 | 85025  | 3068        | 11.97      |

|   | Peak Name   | RT     | Area  | Height (μV) | Resolution |
|---|-------------|--------|-------|-------------|------------|
| 6 | Compound 1n | 25.857 | 70008 | 2208        | 4.05       |

# Chloride\_Ethyl\_Accuracy

Reported by User: Roman Roxana (roman\_roxana)  
 Acquisition Server: Waters-cd3  
 Project Name: Teste\Thiazides  
 Sample Set Name: Seria Etil\_Cl 7 93 Accuracy  
 Code column: Inertsil ODS-3 250\*4.6 mm 5um LA140

## SAMPLE INFORMATION

|                   |                     |                     |                             |
|-------------------|---------------------|---------------------|-----------------------------|
| Sample Name:      | Solution 4.0 ug/ mL | Date Acquired:      | 2/11/2023 9:07:14 PM EET    |
| Sample Type:      | Unknown             | Acq. Method Set:    | Seria Etil_Cl 7 93 Accuracy |
| Vial:             | 5                   | Date Processed:     | 4/19/2023 1:42:21 PM EEST   |
| Injection #:      | 1                   | Processing Method:  | Seria Etil_Cl 7 93 Accuracy |
| Injection Volume: | 10.00 ul            | Channel Name:       | Extract 275                 |
| Run Time:         | 35.0 Minutes        | Proc. Chnl. Descr.: | 2998 PDA 275.0 nm (2998)    |
| Acquired By:      | roman_roxana        |                     |                             |

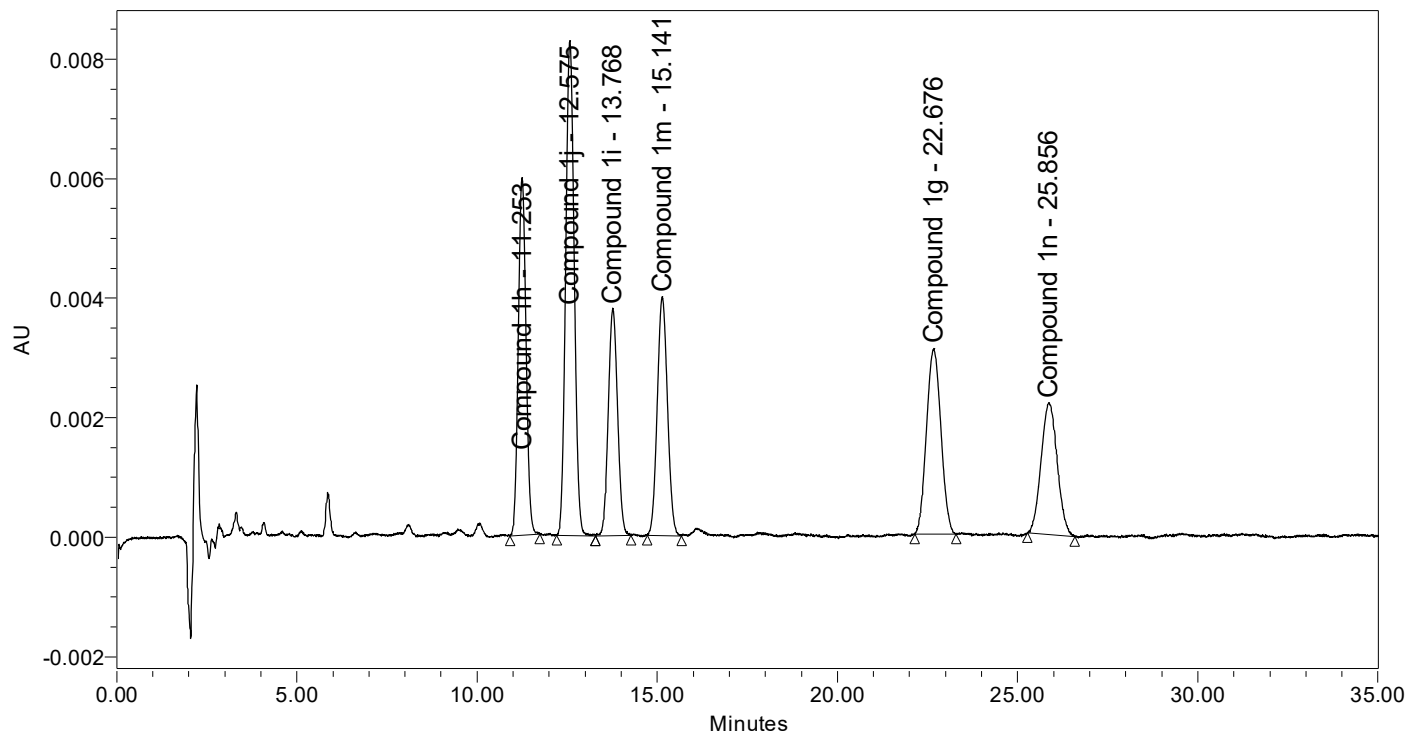

|   | Peak Name   | RT     | Area   | Height (μV) | Resolution |
|---|-------------|--------|--------|-------------|------------|
| 1 | Compound 1h | 11.253 | 88200  | 5990        |            |
| 2 | Compound 1j | 12.575 | 134401 | 8282        | 3.23       |
| 3 | Compound 1i | 13.768 | 67420  | 3800        | 2.66       |
| 4 | Compound 1m | 15.141 | 77647  | 3997        | 2.79       |
| 5 | Compound 1g | 22.676 | 85606  | 3113        | 12.04      |

|   | Peak Name   | RT     | Area  | Height (μV) | Resolution |
|---|-------------|--------|-------|-------------|------------|
| 6 | Compound 1n | 25.856 | 69497 | 2204        | 4.02       |

# Chloride\_Ethyl\_Accuracy

Reported by User: Roman Roxana (roman\_roxana)  
 Acquisition Server: Waters-cd3  
 Project Name: Teste\Thiazides  
 Sample Set Name: Seria Etil\_Cl 7 93 Accuracy  
 Code column: Inertsil ODS-3 250\*4.6 mm 5um LA140

## SAMPLE INFORMATION

|                   |                     |                     |                             |
|-------------------|---------------------|---------------------|-----------------------------|
| Sample Name:      | Solution 4.0 ug/ mL | Date Acquired:      | 2/11/2023 9:42:53 PM EET    |
| Sample Type:      | Unknown             | Acq. Method Set:    | Seria Etil_Cl 7 93 Accuracy |
| Vial:             | 6                   | Date Processed:     | 4/19/2023 1:42:25 PM EEST   |
| Injection #:      | 1                   | Processing Method:  | Seria Etil_Cl 7 93 Accuracy |
| Injection Volume: | 10.00 ul            | Channel Name:       | Extract 275                 |
| Run Time:         | 35.0 Minutes        | Proc. Chnl. Descr.: | 2998 PDA 275.0 nm (2998)    |
| Acquired By:      | roman_roxana        |                     |                             |

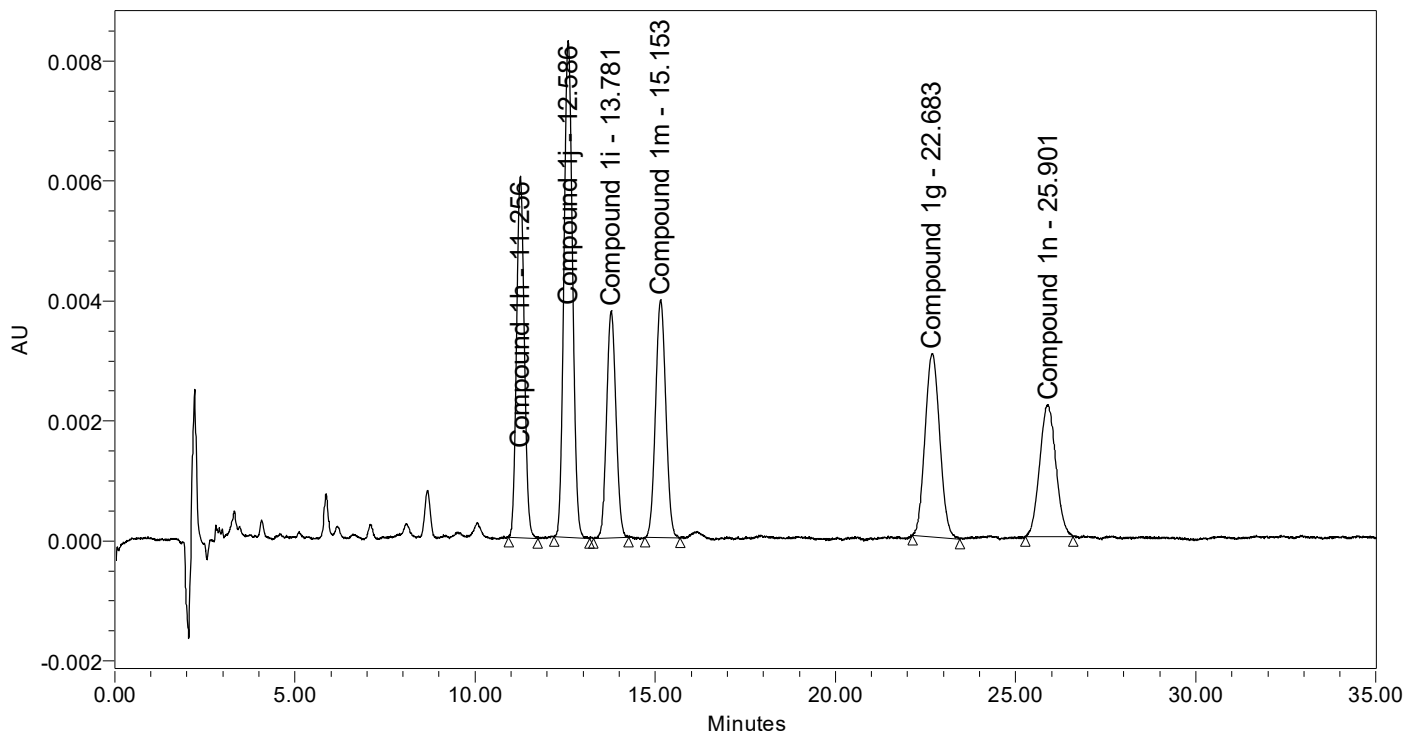

|   | Peak Name   | RT     | Area   | Height (μV) | Resolution |
|---|-------------|--------|--------|-------------|------------|
| 1 | Compound 1h | 11.256 | 88987  | 6031        |            |
| 2 | Compound 1j | 12.586 | 135422 | 8287        | 3.24       |
| 3 | Compound 1i | 13.781 | 67585  | 3786        | 2.64       |
| 4 | Compound 1m | 15.153 | 77469  | 3968        | 2.77       |
| 5 | Compound 1g | 22.683 | 86004  | 3062        | 11.94      |

|   | Peak Name   | RT     | Area  | Height (μV) | Resolution |
|---|-------------|--------|-------|-------------|------------|
| 6 | Compound 1n | 25.901 | 69537 | 2198        | 4.04       |



# Chloride\_Ethyl\_Accuracy

Reported by User: Roman Roxana (roman\_roxana)  
 Acquisition Server: Waters-cd3  
 Project Name: Teste\Thiazides  
 Sample Set Name: Seria Etil\_Cl 7 93 Accuracy  
 Code column: Inertsil ODS-3 250\*4.6 mm 5um LA140

## SAMPLE INFORMATION

|                   |                     |                     |                             |
|-------------------|---------------------|---------------------|-----------------------------|
| Sample Name:      | Solution 4.0 ug/ mL | Date Acquired:      | 2/11/2023 10:18:33 PM EET   |
| Sample Type:      | Unknown             | Acq. Method Set:    | Seria Etil_Cl 7 93 Accuracy |
| Vial:             | 7                   | Date Processed:     | 4/19/2023 2:17:55 PM EEST   |
| Injection #:      | 1                   | Processing Method:  | Seria Etil_Cl 7 93 Accuracy |
| Injection Volume: | 10.00 ul            | Channel Name:       | Extract 275                 |
| Run Time:         | 35.0 Minutes        | Proc. Chnl. Descr.: | 2998 PDA 275.0 nm (2998)    |
| Acquired By:      | roman_roxana        |                     |                             |

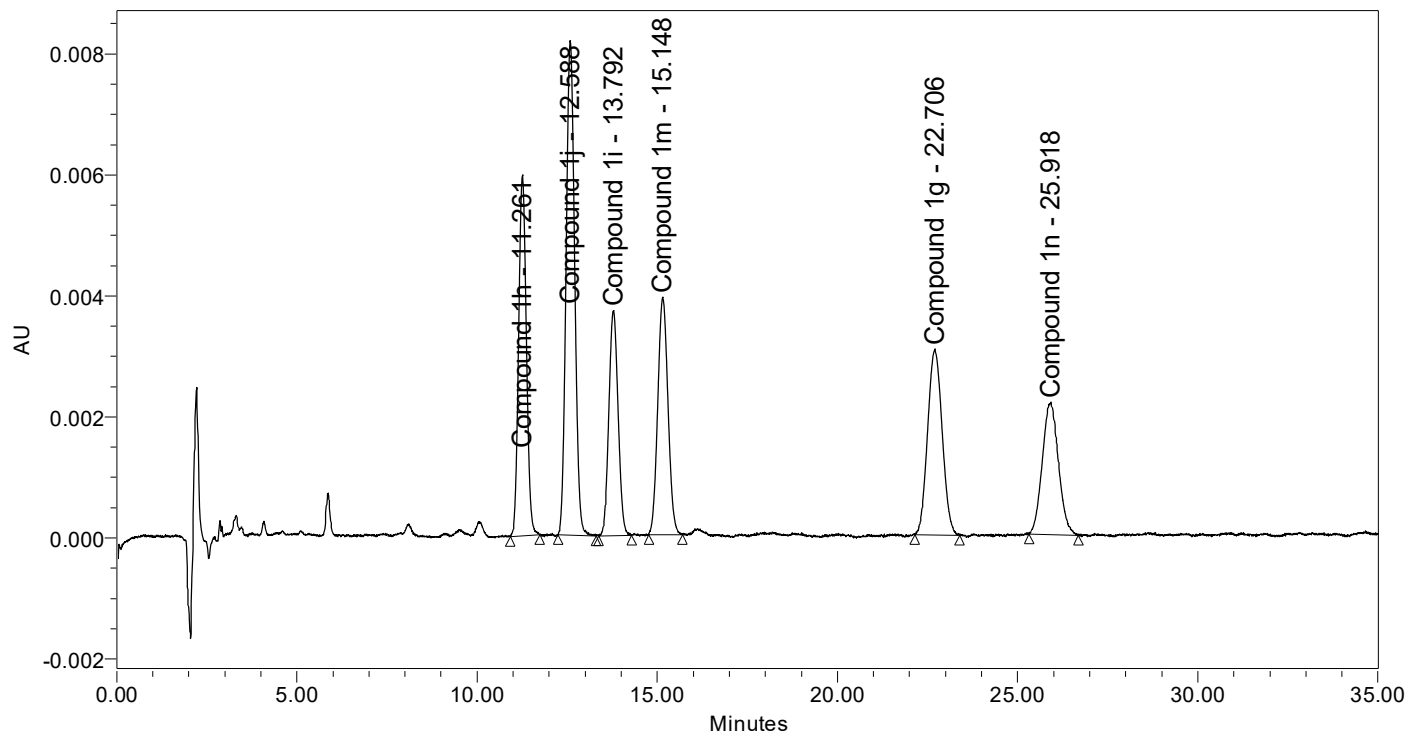

|   | Peak Name   | RT     | Area   | Height (μV) | Resolution |
|---|-------------|--------|--------|-------------|------------|
| 1 | Compound 1h | 11.261 | 87697  | 5958        |            |
| 2 | Compound 1j | 12.588 | 132917 | 8167        | 3.24       |
| 3 | Compound 1i | 13.792 | 65504  | 3721        | 2.69       |
| 4 | Compound 1m | 15.148 | 76178  | 3921        | 2.77       |
| 5 | Compound 1g | 22.706 | 84949  | 3066        | 12.01      |

|   | Peak Name   | RT     | Area  | Height (μV) | Resolution |
|---|-------------|--------|-------|-------------|------------|
| 6 | Compound 1n | 25.918 | 68989 | 2185        | 4.07       |

# Chloride\_Ethyl\_Accuracy

Reported by User: Roman Roxana (roman\_roxana)  
 Acquisition Server: Waters-cd3  
 Project Name: Teste\Thiazides  
 Sample Set Name: Seria Etil\_Cl 7 93 Accuracy  
 Code column: Inertsil ODS-3 250\*4.6 mm 5um LA140

## SAMPLE INFORMATION

|                   |                     |                     |                             |
|-------------------|---------------------|---------------------|-----------------------------|
| Sample Name:      | Solution 5.0 ug/ mL | Date Acquired:      | 2/11/2023 10:54:16 PM EET   |
| Sample Type:      | Unknown             | Acq. Method Set:    | Seria Etil_Cl 7 93 Accuracy |
| Vial:             | 8                   | Date Processed:     | 4/19/2023 2:19:19 PM EEST   |
| Injection #:      | 1                   | Processing Method:  | Seria Etil_Cl 7 93 Accuracy |
| Injection Volume: | 10.00 ul            | Channel Name:       | Extract 275                 |
| Run Time:         | 35.0 Minutes        | Proc. Chnl. Descr.: | 2998 PDA 275.0 nm (2998)    |
| Acquired By:      | roman_roxana        |                     |                             |

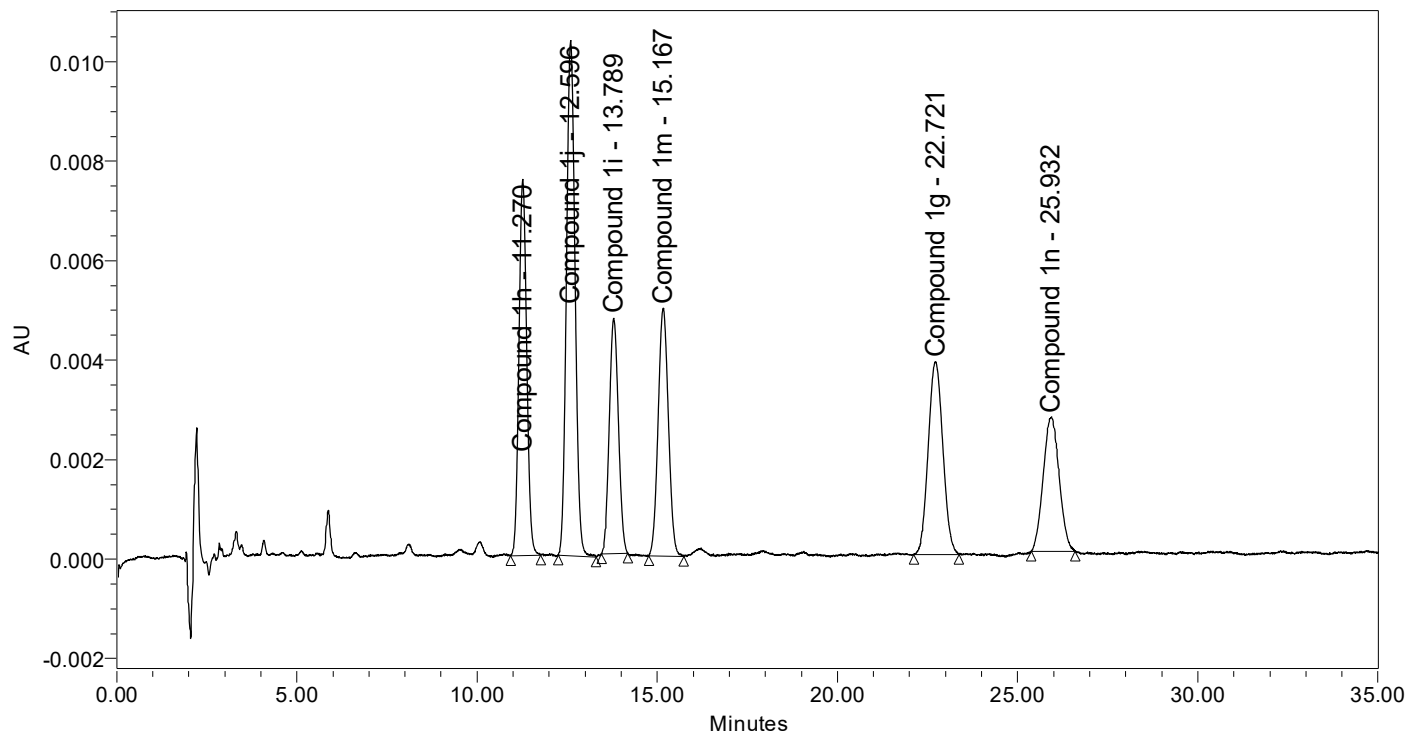

|   | Peak Name   | RT     | Area   | Height (μV) | Resolution |
|---|-------------|--------|--------|-------------|------------|
| 1 | Compound 1h | 11.270 | 111591 | 7560        |            |
| 2 | Compound 1j | 12.596 | 169135 | 10358       | 3.24       |
| 3 | Compound 1i | 13.789 | 82009  | 4729        | 2.67       |
| 4 | Compound 1m | 15.167 | 97170  | 4975        | 2.81       |
| 5 | Compound 1g | 22.721 | 108491 | 3876        | 11.98      |

|   | Peak Name   | RT     | Area  | Height (μV) | Resolution |
|---|-------------|--------|-------|-------------|------------|
| 6 | Compound 1n | 25.932 | 84215 | 2703        | 4.06       |

# Chloride\_Ethyl\_Accuracy

Reported by User: Roman Roxana (roman\_roxana)  
 Acquisition Server: Waters-cd3  
 Project Name: Teste\Thiazides  
 Sample Set Name: Seria Etil\_CI 7 93 Accuracy  
 Code column: Inertsil ODS-3 250\*4.6 mm 5um LA140

## SAMPLE INFORMATION

|                   |                     |                     |                             |
|-------------------|---------------------|---------------------|-----------------------------|
| Sample Name:      | Solution 5.0 ug/ mL | Date Acquired:      | 2/11/2023 11:29:57 PM EET   |
| Sample Type:      | Unknown             | Acq. Method Set:    | Seria Etil_CI 7 93 Accuracy |
| Vial:             | 9                   | Date Processed:     | 4/19/2023 2:20:41 PM EEST   |
| Injection #:      | 1                   | Processing Method:  | Seria Etil_CI 7 93 Accuracy |
| Injection Volume: | 10.00 ul            | Channel Name:       | Extract 275                 |
| Run Time:         | 35.0 Minutes        | Proc. Chnl. Descr.: | 2998 PDA 275.0 nm (2998)    |
| Acquired By:      | roman_roxana        |                     |                             |

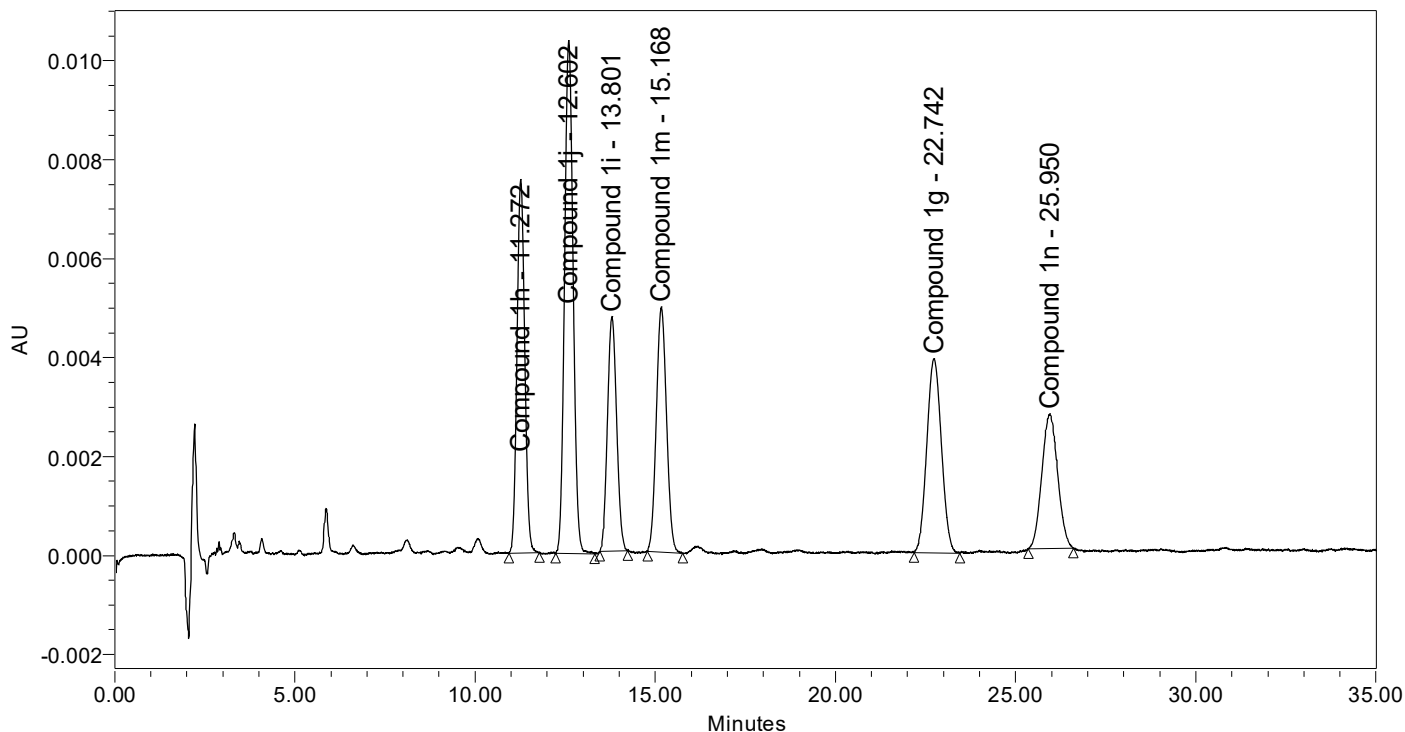

|   | Peak Name   | RT     | Area   | Height (μV) | Resolution |
|---|-------------|--------|--------|-------------|------------|
| 1 | Compound 1h | 11.272 | 111110 | 7556        |            |
| 2 | Compound 1j | 12.602 | 168465 | 10362       | 3.26       |
| 3 | Compound 1i | 13.801 | 82735  | 4741        | 2.68       |
| 4 | Compound 1m | 15.168 | 96179  | 4953        | 2.79       |
| 5 | Compound 1g | 22.742 | 109245 | 3926        | 12.05      |

|   | Peak Name   | RT     | Area  | Height (μV) | Resolution |
|---|-------------|--------|-------|-------------|------------|
| 6 | Compound 1n | 25.950 | 84630 | 2728        | 4.06       |

# Chloride\_Ethyl\_Accuracy

Reported by User: Roman Roxana (roman\_roxana)  
 Acquisition Server: Waters-cd3  
 Project Name: Teste\Thiazides  
 Sample Set Name: Seria Etil\_CI 7 93 Accuracy  
 Code column: Inertsil ODS-3 250\*4.6 mm 5um LA140

## SAMPLE INFORMATION

|                   |                     |                     |                             |
|-------------------|---------------------|---------------------|-----------------------------|
| Sample Name:      | Solution 5.0 ug/ mL | Date Acquired:      | 2/12/2023 12:05:37 AM EET   |
| Sample Type:      | Unknown             | Acq. Method Set:    | Seria Etil_CI 7 93 Accuracy |
| Vial:             | 10                  | Date Processed:     | 4/19/2023 2:21:41 PM EEST   |
| Injection #:      | 1                   | Processing Method:  | Seria Etil_CI 7 93 Accuracy |
| Injection Volume: | 10.00 ul            | Channel Name:       | Extract 275                 |
| Run Time:         | 35.0 Minutes        | Proc. Chnl. Descr.: | 2998 PDA 275.0 nm (2998)    |
| Acquired By:      | roman_roxana        |                     |                             |



|   | Peak Name   | RT     | Area   | Height (μV) | Resolution |
|---|-------------|--------|--------|-------------|------------|
| 1 | Compound 1h | 11.276 | 111024 | 7548        |            |
| 2 | Compound 1j | 12.612 | 168231 | 10320       | 3.27       |
| 3 | Compound 1i | 13.818 | 82661  | 4734        | 2.69       |
| 4 | Compound 1m | 15.178 | 96381  | 4942        | 2.77       |
| 5 | Compound 1g | 22.766 | 108577 | 3894        | 12.07      |

|   | Peak Name   | RT     | Area  | Height (μV) | Resolution |
|---|-------------|--------|-------|-------------|------------|
| 6 | Compound 1n | 25.974 | 82741 | 2697        | 4.08       |

# Chloride\_Ethyl\_Accuracy

Reported by User: Roman Roxana (roman\_roxana)  
 Acquisition Server: Waters-cd3  
 Project Name: Teste\Thiazides  
 Sample Set Name: Seria Etil\_Cl 7 93 Accuracy  
 Code column: Inertsil ODS-3 250\*4.6 mm 5um LA140

## SAMPLE INFORMATION

|                   |                     |                     |                             |
|-------------------|---------------------|---------------------|-----------------------------|
| Sample Name:      | Solution 5.0 ug/ mL | Date Acquired:      | 2/12/2023 12:41:19 AM EET   |
| Sample Type:      | Unknown             | Acq. Method Set:    | Seria Etil_Cl 7 93 Accuracy |
| Vial:             | 11                  | Date Processed:     | 4/19/2023 2:22:11 PM EEST   |
| Injection #:      | 1                   | Processing Method:  | Seria Etil_Cl 7 93 Accuracy |
| Injection Volume: | 10.00 ul            | Channel Name:       | Extract 275                 |
| Run Time:         | 35.0 Minutes        | Proc. Chnl. Descr.: | 2998 PDA 275.0 nm (2998)    |
| Acquired By:      | roman_roxana        |                     |                             |



|   | Peak Name   | RT     | Area   | Height (μV) | Resolution |
|---|-------------|--------|--------|-------------|------------|
| 1 | Compound 1h | 11.281 | 110663 | 7501        |            |
| 2 | Compound 1j | 12.614 | 168785 | 10270       | 3.24       |
| 3 | Compound 1i | 13.816 | 82849  | 4720        | 2.67       |
| 4 | Compound 1m | 15.190 | 95668  | 4879        | 2.78       |
| 5 | Compound 1g | 22.768 | 107246 | 3831        | 12.02      |

|   | Peak Name   | RT     | Area  | Height (μV) | Resolution |
|---|-------------|--------|-------|-------------|------------|
| 6 | Compound 1n | 25.991 | 83968 | 2673        | 4.05       |

# Chloride\_Ethyl\_Accuracy

Reported by User: Roman Roxana (roman\_roxana)  
 Acquisition Server: Waters-cd3  
 Project Name: Teste\Thiazides  
 Sample Set Name: Seria Etil\_Cl 7 93 Accuracy  
 Code column: Inertsil ODS-3 250\*4.6 mm 5um LA140

## SAMPLE INFORMATION

|                   |                     |                     |                             |
|-------------------|---------------------|---------------------|-----------------------------|
| Sample Name:      | Solution 5.0 ug/ mL | Date Acquired:      | 2/12/2023 1:17:02 AM EET    |
| Sample Type:      | Unknown             | Acq. Method Set:    | Seria Etil_Cl 7 93 Accuracy |
| Vial:             | 12                  | Date Processed:     | 4/19/2023 2:23:16 PM EEST   |
| Injection #:      | 1                   | Processing Method:  | Seria Etil_Cl 7 93 Accuracy |
| Injection Volume: | 10.00 ul            | Channel Name:       | Extract 275                 |
| Run Time:         | 35.0 Minutes        | Proc. Chnl. Descr.: | 2998 PDA 275.0 nm (2998)    |
| Acquired By:      | roman_roxana        |                     |                             |

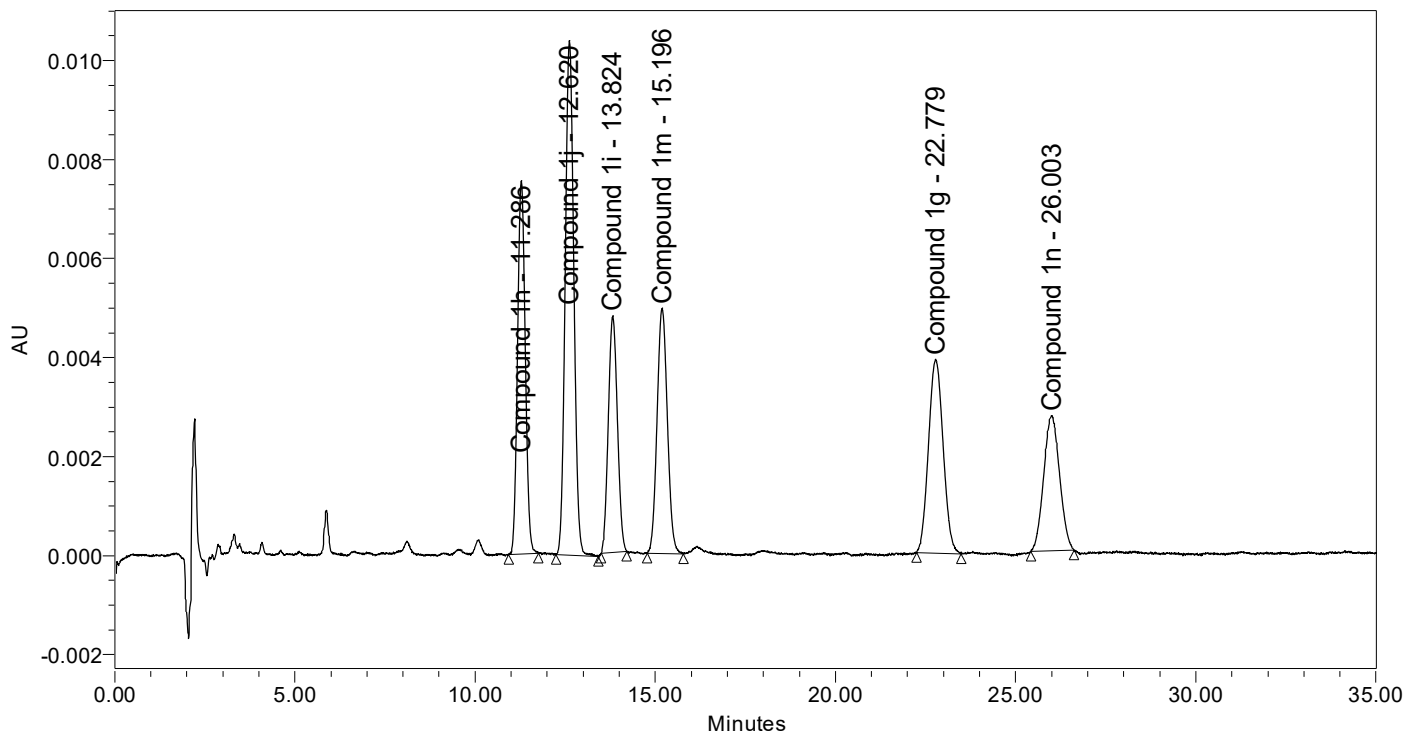

|   | Peak Name   | RT     | Area   | Height (μV) | Resolution |
|---|-------------|--------|--------|-------------|------------|
| 1 | Compound 1h | 11.286 | 110997 | 7538        |            |
| 2 | Compound 1j | 12.620 | 169796 | 10394       | 3.25       |
| 3 | Compound 1i | 13.824 | 82632  | 4775        | 2.69       |
| 4 | Compound 1m | 15.196 | 97012  | 4948        | 2.80       |
| 5 | Compound 1g | 22.779 | 108996 | 3908        | 12.07      |

|   | Peak Name   | RT     | Area  | Height (μV) | Resolution |
|---|-------------|--------|-------|-------------|------------|
| 6 | Compound 1n | 26.003 | 84959 | 2724        | 4.08       |

# Chloride\_Ethyl\_Accuracy

Reported by User: Roman Roxana (roman\_roxana)  
 Acquisition Server: Waters-cd3  
 Project Name: Teste\Thiazides  
 Sample Set Name: Seria Etil\_Cl 7 93 Accuracy  
 Code column: Inertsil ODS-3 250\*4.6 mm 5um LA140

## SAMPLE INFORMATION

|                   |                     |                     |                             |
|-------------------|---------------------|---------------------|-----------------------------|
| Sample Name:      | Solution 5.0 ug/ mL | Date Acquired:      | 2/12/2023 1:52:42 AM EET    |
| Sample Type:      | Unknown             | Acq. Method Set:    | Seria Etil_Cl 7 93 Accuracy |
| Vial:             | 13                  | Date Processed:     | 4/19/2023 2:23:44 PM EEST   |
| Injection #:      | 1                   | Processing Method:  | Seria Etil_Cl 7 93 Accuracy |
| Injection Volume: | 10.00 ul            | Channel Name:       | Extract 275                 |
| Run Time:         | 35.0 Minutes        | Proc. Chnl. Descr.: | 2998 PDA 275.0 nm (2998)    |
| Acquired By:      | roman_roxana        |                     |                             |

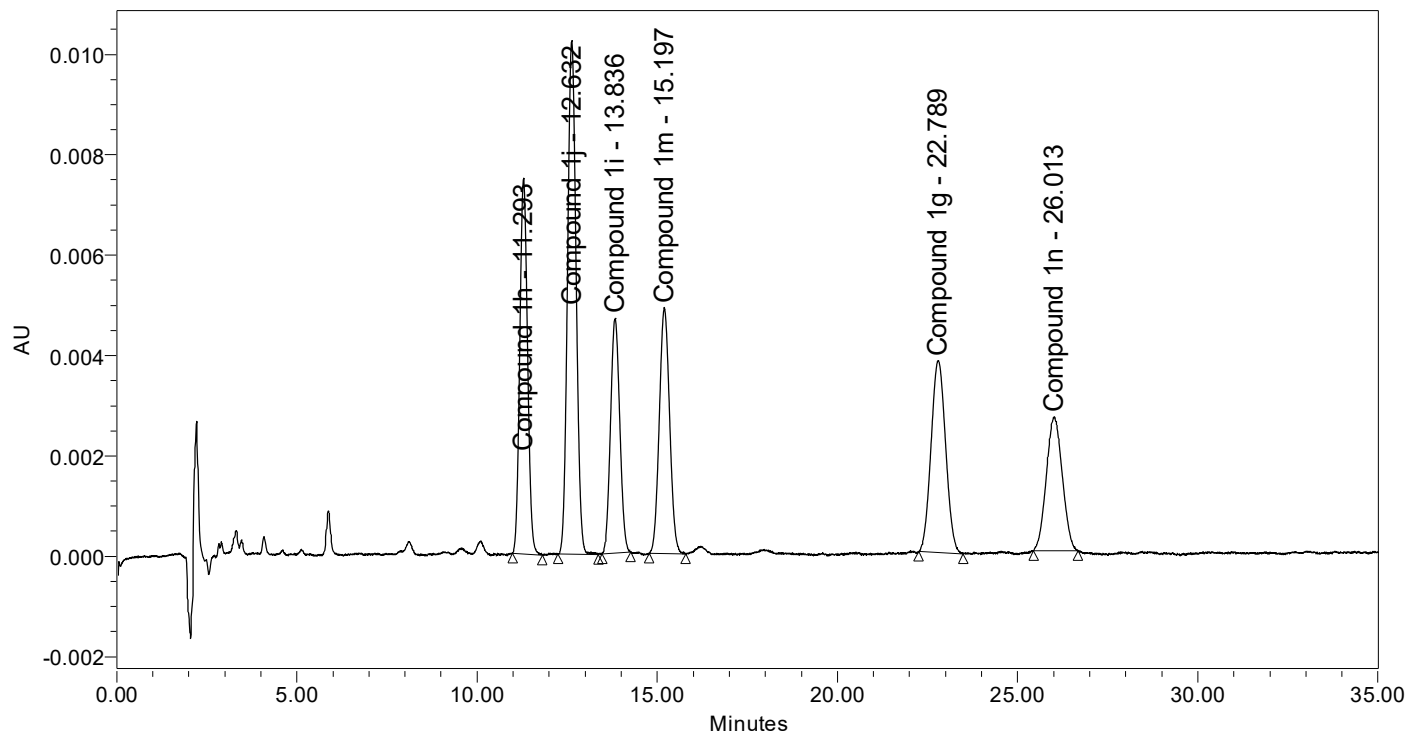

|   | Peak Name   | RT     | Area   | Height (μV) | Resolution |
|---|-------------|--------|--------|-------------|------------|
| 1 | Compound 1h | 11.293 | 110417 | 7486        |            |
| 2 | Compound 1j | 12.632 | 166835 | 10236       | 3.26       |
| 3 | Compound 1i | 13.836 | 82261  | 4679        | 2.68       |
| 4 | Compound 1m | 15.197 | 96243  | 4902        | 2.76       |
| 5 | Compound 1g | 22.789 | 106276 | 3822        | 12.03      |

|   | Peak Name   | RT     | Area  | Height (μV) | Resolution |
|---|-------------|--------|-------|-------------|------------|
| 6 | Compound 1n | 26.013 | 83531 | 2673        | 4.06       |

# Chloride\_Ethyl\_Accuracy

Reported by User: Roman Roxana (roman\_roxana)  
 Acquisition Server: Waters-cd3  
 Project Name: Teste\Thiazides  
 Sample Set Name: Seria Etil\_Cl 7 93 Accuracy  
 Code column: Inertsil ODS-3 250\*4.6 mm 5um LA140

## SAMPLE INFORMATION

|                   |                     |                     |                             |
|-------------------|---------------------|---------------------|-----------------------------|
| Sample Name:      | Solution 6.0 ug/ mL | Date Acquired:      | 2/12/2023 2:28:24 AM EET    |
| Sample Type:      | Unknown             | Acq. Method Set:    | Seria Etil_Cl 7 93 Accuracy |
| Vial:             | 14                  | Date Processed:     | 4/19/2023 1:44:01 PM EEST   |
| Injection #:      | 1                   | Processing Method:  | Seria Etil_Cl 7 93 Accuracy |
| Injection Volume: | 10.00 ul            | Channel Name:       | Extract 275                 |
| Run Time:         | 35.0 Minutes        | Proc. Chnl. Descr.: | 2998 PDA 275.0 nm (2998)    |
| Acquired By:      | roman_roxana        |                     |                             |

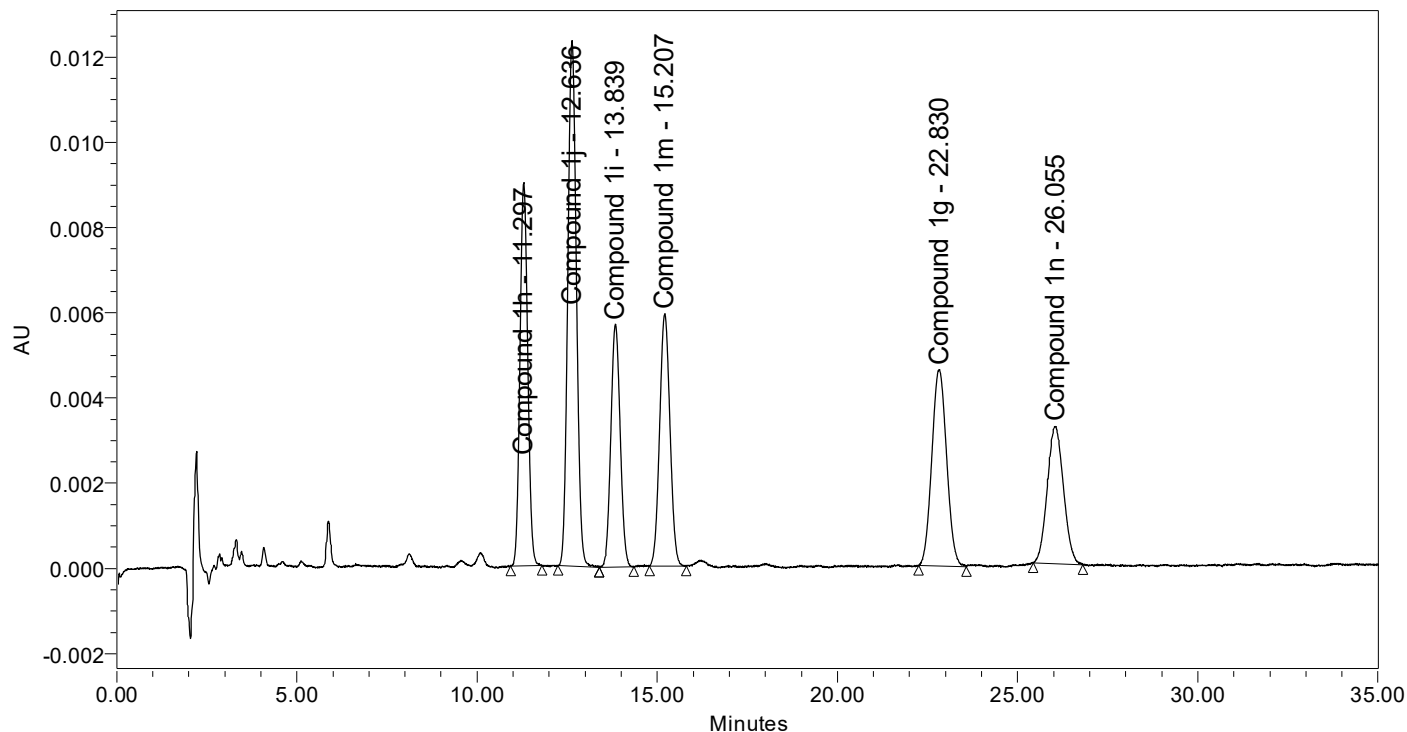

|   | Peak Name   | RT     | Area   | Height (μV) | Resolution |
|---|-------------|--------|--------|-------------|------------|
| 1 | Compound 1h | 11.297 | 132813 | 9000        |            |
| 2 | Compound 1j | 12.636 | 201924 | 12341       | 3.26       |
| 3 | Compound 1i | 13.839 | 101600 | 5700        | 2.66       |
| 4 | Compound 1m | 15.207 | 116348 | 5919        | 2.76       |
| 5 | Compound 1g | 22.830 | 129988 | 4614        | 12.02      |

|   | Peak Name   | RT     | Area   | Height (μV) | Resolution |
|---|-------------|--------|--------|-------------|------------|
| 6 | Compound 1n | 26.055 | 102402 | 3229        | 4.05       |



# Chloride\_Ethyl\_Accuracy

Reported by User: Roman Roxana (roman\_roxana)  
 Acquisition Server: Waters-cd3  
 Project Name: Teste\Thiazides  
 Sample Set Name: Seria Etil\_Cl 7 93 Accuracy  
 Code column: Inertsil ODS-3 250\*4.6 mm 5um LA140

## SAMPLE INFORMATION

|                   |                     |                     |                             |
|-------------------|---------------------|---------------------|-----------------------------|
| Sample Name:      | Solution 6.0 ug/ mL | Date Acquired:      | 2/12/2023 3:04:05 AM EET    |
| Sample Type:      | Unknown             | Acq. Method Set:    | Seria Etil_Cl 7 93 Accuracy |
| Vial:             | 15                  | Date Processed:     | 4/19/2023 2:25:25 PM EEST   |
| Injection #:      | 1                   | Processing Method:  | Seria Etil_Cl 7 93 Accuracy |
| Injection Volume: | 10.00 ul            | Channel Name:       | Extract 275                 |
| Run Time:         | 35.0 Minutes        | Proc. Chnl. Descr.: | 2998 PDA 275.0 nm (2998)    |
| Acquired By:      | roman_roxana        |                     |                             |

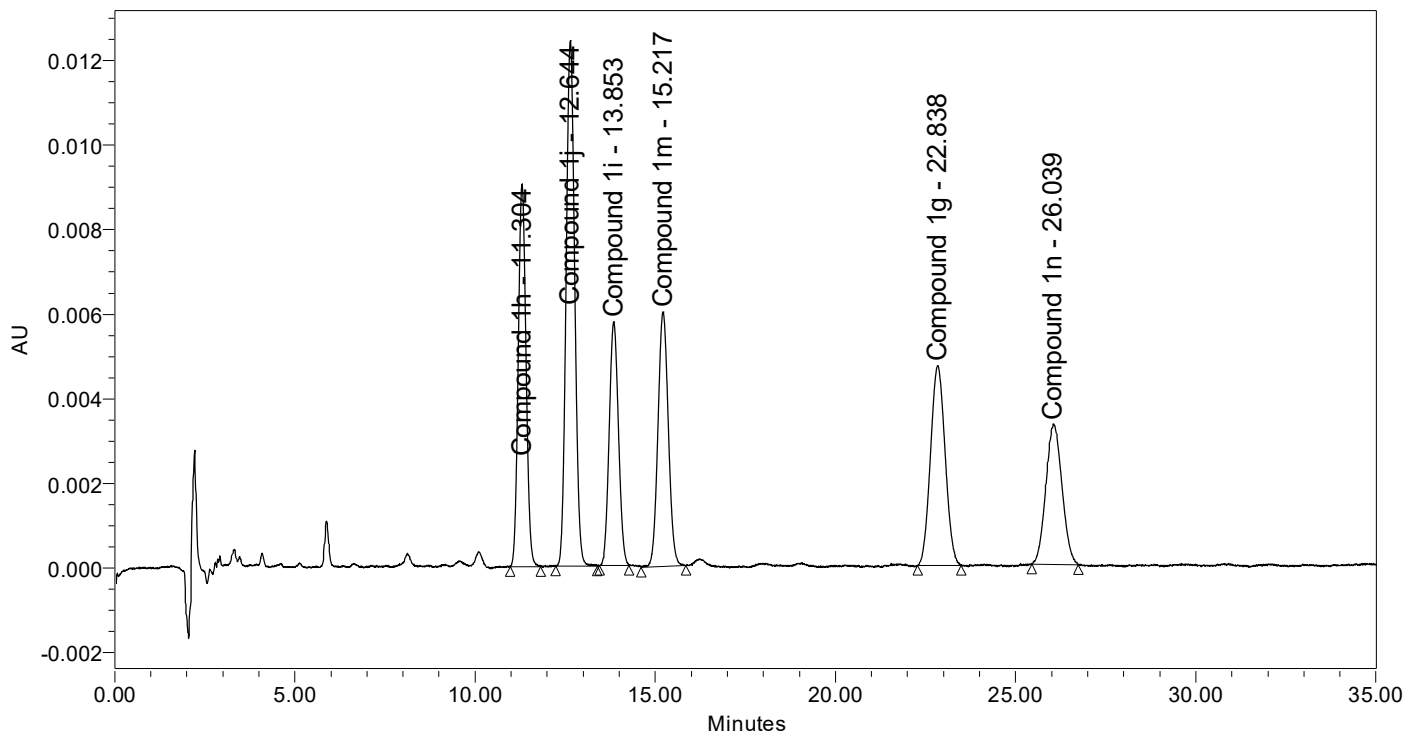

|   | Peak Name   | RT     | Area   | Height (μV) | Resolution |
|---|-------------|--------|--------|-------------|------------|
| 1 | Compound 1h | 11.304 | 133659 | 9042        |            |
| 2 | Compound 1j | 12.644 | 202900 | 12423       | 3.26       |
| 3 | Compound 1i | 13.853 | 101352 | 5755        | 2.68       |
| 4 | Compound 1m | 15.217 | 118831 | 6017        | 2.76       |
| 5 | Compound 1g | 22.838 | 131659 | 4717        | 12.06      |

|   | Peak Name   | RT     | Area   | Height (μV) | Resolution |
|---|-------------|--------|--------|-------------|------------|
| 6 | Compound 1n | 26.039 | 104769 | 3315        | 4.02       |

# Chloride\_Ethyl\_Accuracy

Reported by User: Roman Roxana (roman\_roxana)  
 Acquisition Server: Waters-cd3  
 Project Name: Teste\Thiazides  
 Sample Set Name: Seria Etil\_Cl 7 93 Accuracy  
 Code column: Inertsil ODS-3 250\*4.6 mm 5um LA140

## SAMPLE INFORMATION

|                   |                     |                     |                             |
|-------------------|---------------------|---------------------|-----------------------------|
| Sample Name:      | Solution 6.0 ug/ mL | Date Acquired:      | 2/12/2023 3:39:46 AM EET    |
| Sample Type:      | Unknown             | Acq. Method Set:    | Seria Etil_Cl 7 93 Accuracy |
| Vial:             | 16                  | Date Processed:     | 4/19/2023 2:31:47 PM EEST   |
| Injection #:      | 1                   | Processing Method:  | Seria Etil_Cl 7 93 Accuracy |
| Injection Volume: | 10.00 ul            | Channel Name:       | Extract 275                 |
| Run Time:         | 35.0 Minutes        | Proc. Chnl. Descr.: | 2998 PDA 275.0 nm (2998)    |
| Acquired By:      | roman_roxana        |                     |                             |

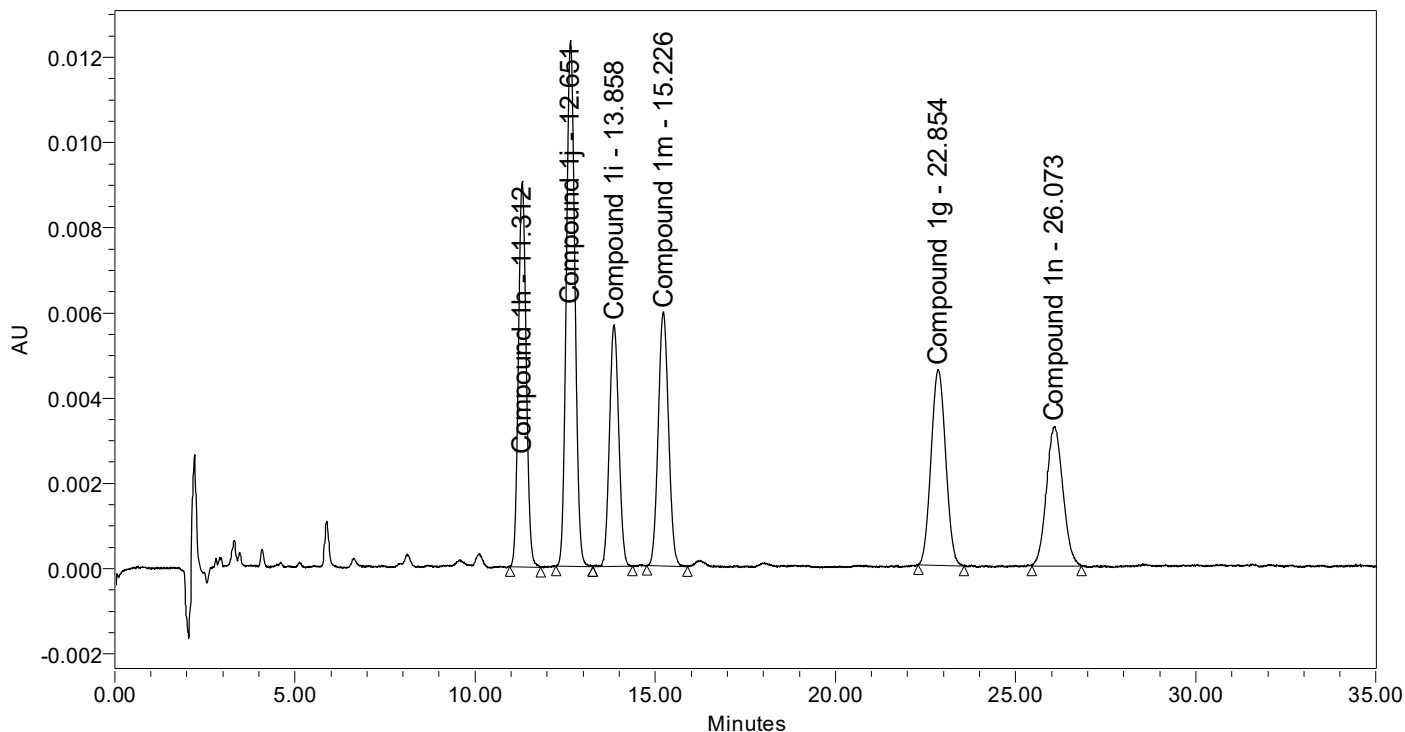

|   | Peak Name   | RT     | Area   | Height (μV) | Resolution |
|---|-------------|--------|--------|-------------|------------|
| 1 | Compound 1h | 11.312 | 134236 | 9046        |            |
| 2 | Compound 1j | 12.651 | 201415 | 12342       | 3.26       |
| 3 | Compound 1i | 13.858 | 100869 | 5677        | 2.67       |
| 4 | Compound 1m | 15.226 | 117002 | 5963        | 2.76       |
| 5 | Compound 1g | 22.854 | 127548 | 4591        | 12.12      |

|   | Peak Name   | RT     | Area   | Height (μV) | Resolution |
|---|-------------|--------|--------|-------------|------------|
| 6 | Compound 1n | 26.073 | 105123 | 3272        | 4.05       |

# Chloride\_Ethyl\_Accuracy

Reported by User: Roman Roxana (roman\_roxana)  
 Acquisition Server: Waters-cd3  
 Project Name: Teste\Thiazides  
 Sample Set Name: Seria Etil\_Cl 7 93 Accuracy  
 Code column: Inertsil ODS-3 250\*4.6 mm 5um LA140

## SAMPLE INFORMATION

|                   |                     |                     |                             |
|-------------------|---------------------|---------------------|-----------------------------|
| Sample Name:      | Solution 6.0 ug/ mL | Date Acquired:      | 2/12/2023 4:15:26 AM EET    |
| Sample Type:      | Unknown             | Acq. Method Set:    | Seria Etil_Cl 7 93 Accuracy |
| Vial:             | 17                  | Date Processed:     | 4/19/2023 2:15:44 PM EEST   |
| Injection #:      | 1                   | Processing Method:  | Seria Etil_Cl 7 93 Accuracy |
| Injection Volume: | 10.00 ul            | Channel Name:       | Extract 275                 |
| Run Time:         | 35.0 Minutes        | Proc. Chnl. Descr.: | 2998 PDA 275.0 nm (2998)    |
| Acquired By:      | roman_roxana        |                     |                             |

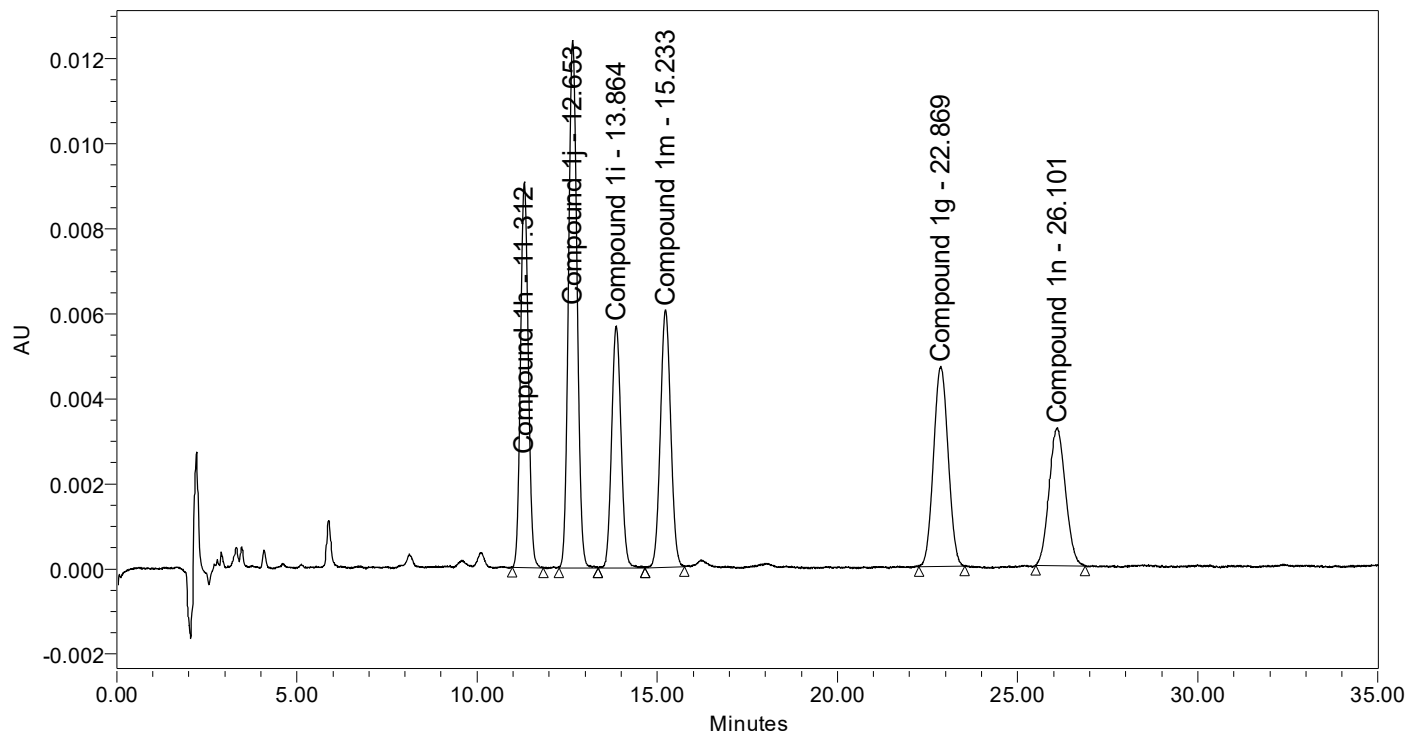

|   | Peak Name   | RT     | Area   | Height (μV) | Resolution |
|---|-------------|--------|--------|-------------|------------|
| 1 | Compound 1h | 11.312 | 133529 | 9067        |            |
| 2 | Compound 1j | 12.653 | 202073 | 12400       | 3.28       |
| 3 | Compound 1i | 13.864 | 102102 | 5691        | 2.69       |
| 4 | Compound 1m | 15.233 | 119030 | 6046        | 2.77       |
| 5 | Compound 1g | 22.869 | 131006 | 4702        | 12.10      |

|   | Peak Name   | RT     | Area   | Height (μV) | Resolution |
|---|-------------|--------|--------|-------------|------------|
| 6 | Compound 1n | 26.101 | 104052 | 3244        | 4.05       |

# Chloride\_Ethyl\_Accuracy

Reported by User: Roman Roxana (roman\_roxana)  
 Acquisition Server: Waters-cd3  
 Project Name: Teste\Thiazides  
 Sample Set Name: Seria Etil\_Cl 7 93 Accuracy  
 Code column: Inertsil ODS-3 250\*4.6 mm 5um LA140

## SAMPLE INFORMATION

|                   |                     |                     |                             |
|-------------------|---------------------|---------------------|-----------------------------|
| Sample Name:      | Solution 6.0 ug/ mL | Date Acquired:      | 2/12/2023 4:51:06 AM EET    |
| Sample Type:      | Unknown             | Acq. Method Set:    | Seria Etil_Cl 7 93 Accuracy |
| Vial:             | 18                  | Date Processed:     | 4/19/2023 2:26:24 PM EEST   |
| Injection #:      | 1                   | Processing Method:  | Seria Etil_Cl 7 93 Accuracy |
| Injection Volume: | 10.00 ul            | Channel Name:       | Extract 275                 |
| Run Time:         | 35.0 Minutes        | Proc. Chnl. Descr.: | 2998 PDA 275.0 nm (2998)    |
| Acquired By:      | roman_roxana        |                     |                             |

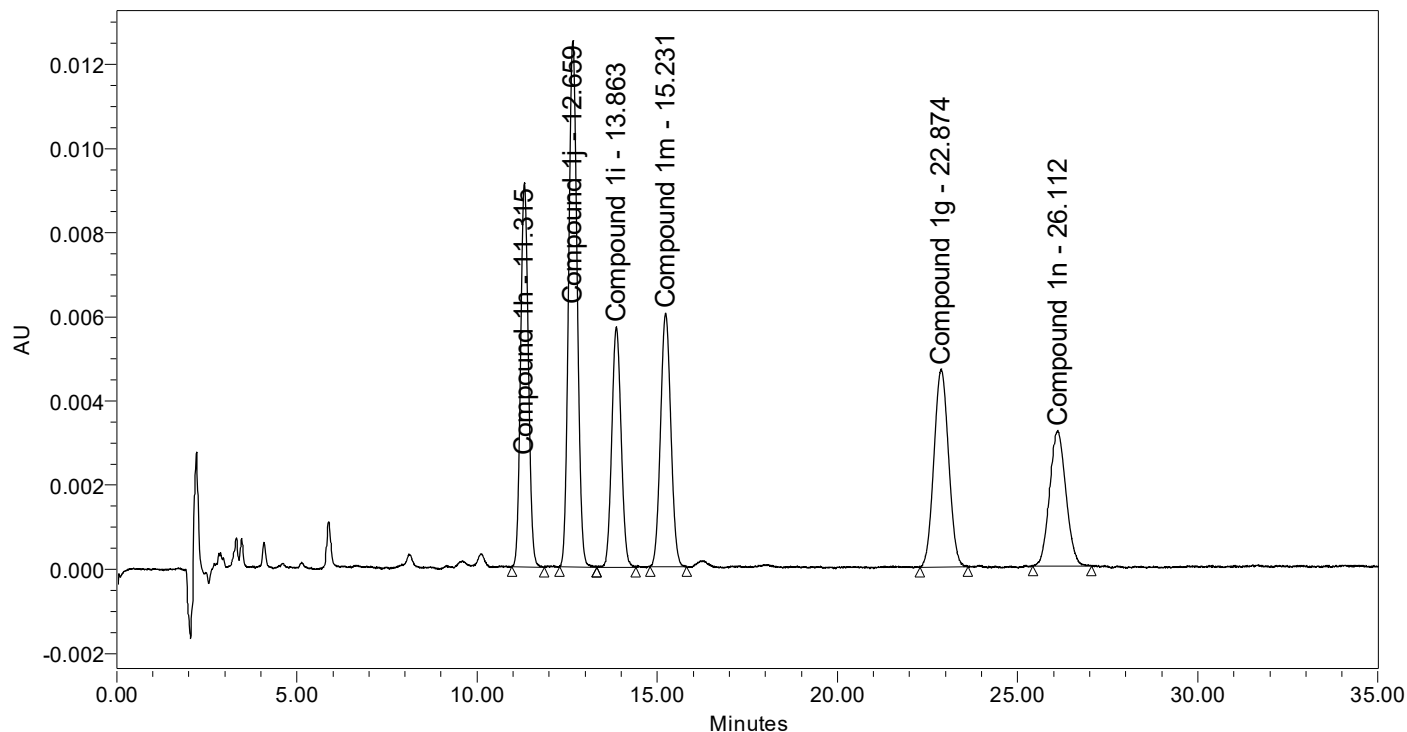

|   | Peak Name   | RT     | Area   | Height (μV) | Resolution |
|---|-------------|--------|--------|-------------|------------|
| 1 | Compound 1h | 11.315 | 134527 | 9127        |            |
| 2 | Compound 1j | 12.659 | 203088 | 12505       | 3.29       |
| 3 | Compound 1i | 13.863 | 101244 | 5708        | 2.68       |
| 4 | Compound 1m | 15.231 | 118523 | 6027        | 2.77       |
| 5 | Compound 1g | 22.874 | 131484 | 4707        | 12.10      |

|   | Peak Name   | RT     | Area   | Height (μV) | Resolution |
|---|-------------|--------|--------|-------------|------------|
| 6 | Compound 1n | 26.112 | 102701 | 3220        | 4.08       |

# Chloride\_Ethyl\_Accuracy

Reported by User: Roman Roxana (roman\_roxana)  
 Acquisition Server: Waters-cd3  
 Project Name: Teste\Thiazides  
 Sample Set Name: Seria Etil\_Cl 7 93 Accuracy  
 Code column: Inertsil ODS-3 250\*4.6 mm 5um LA140

## SAMPLE INFORMATION

|                   |                     |                     |                             |
|-------------------|---------------------|---------------------|-----------------------------|
| Sample Name:      | Solution 6.0 ug/ mL | Date Acquired:      | 2/12/2023 5:26:47 AM EET    |
| Sample Type:      | Unknown             | Acq. Method Set:    | Seria Etil_Cl 7 93 Accuracy |
| Vial:             | 19                  | Date Processed:     | 4/19/2023 3:52:37 PM EEST   |
| Injection #:      | 1                   | Processing Method:  | Seria Etil_Cl 7 93 Accuracy |
| Injection Volume: | 10.00 ul            | Channel Name:       | Extract 275                 |
| Run Time:         | 35.0 Minutes        | Proc. Chnl. Descr.: | 2998 PDA 275.0 nm (2998)    |
| Acquired By:      | roman_roxana        |                     |                             |

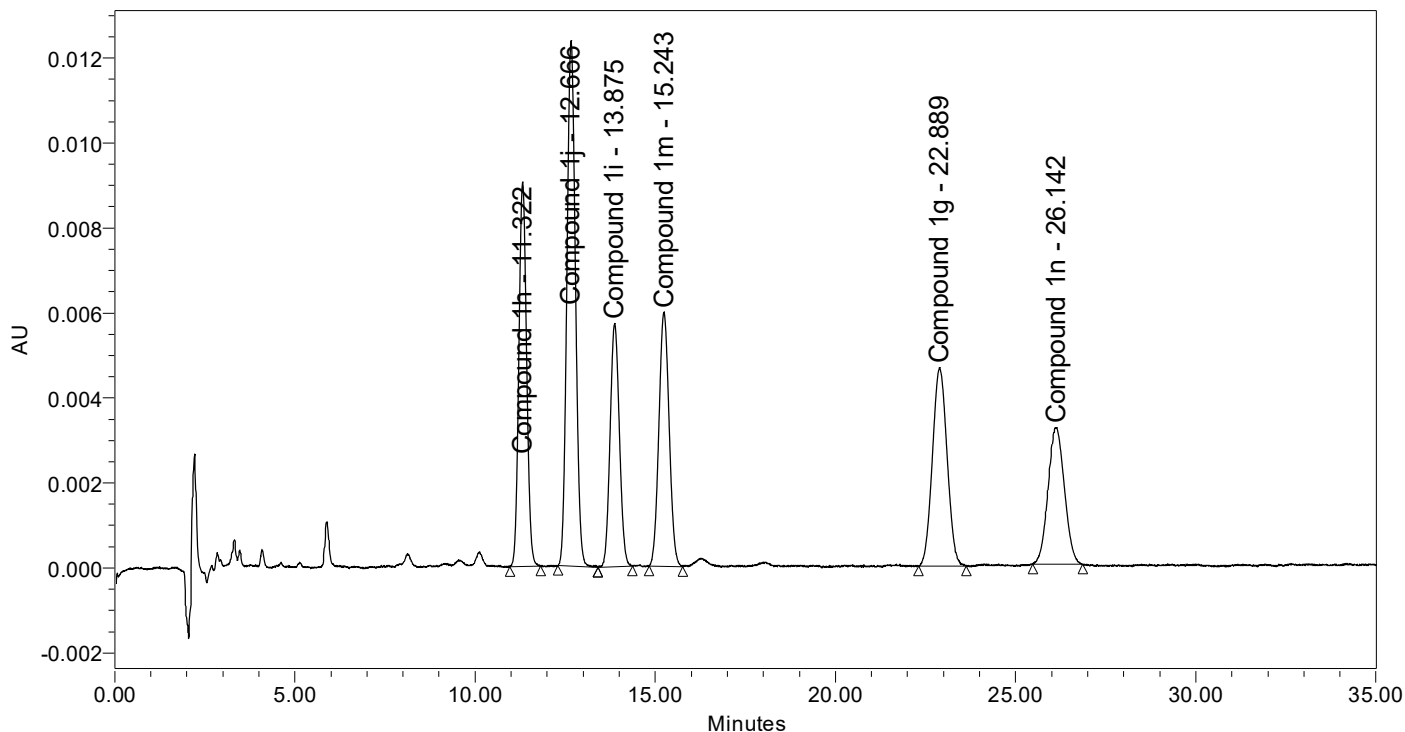

|   | Peak Name   | RT     | Area   | Height (μV) | Resolution |
|---|-------------|--------|--------|-------------|------------|
| 1 | Compound 1h | 11.322 | 133149 | 9043        |            |
| 2 | Compound 1j | 12.666 | 201432 | 12369       | 3.28       |
| 3 | Compound 1i | 13.875 | 101373 | 5725        | 2.69       |
| 4 | Compound 1m | 15.243 | 116833 | 5982        | 2.78       |
| 5 | Compound 1g | 22.889 | 130301 | 4663        | 12.13      |

|   | Peak Name   | RT     | Area   | Height (μV) | Resolution |
|---|-------------|--------|--------|-------------|------------|
| 6 | Compound 1n | 26.142 | 102703 | 3214        | 4.08       |

**Quantitative determination of  
*compounds 1g, 1h, 1i, 1j, 1m, 1n***

**- Validation of the analytical method -**

Validation parameters:

- Specificity
- Precision 1
- Precision 2
- LOD – LOQ
- Linearity
- Range
- Accuracy
- **Robustness**

**Quantitative determination of**  
***compounds 1g, 1h, 1i, 1j, 1m, 1n***  
**- Validation of the analytical method -**

### **Robustness**

**Mobile phase Solvent A: Solvent B (93: 7, V/V)**

# Chloride\_Ethyl\_Robustness

Reported by User: Roman Roxana (roman\_roxana)  
 Acquisition Server: Waters-cd3  
 Project Name: Teste\Thiazides  
 Sample Set Name: Seria Etil\_Cl Robustness  
 Code column: Inertsil ODS-3 250\*4.6 mm 5um LA140

## SAMPLE INFORMATION

|                   |                   |                     |                           |
|-------------------|-------------------|---------------------|---------------------------|
| Sample Name:      | Solution 5 ug/ mL | Date Acquired:      | 2/13/2023 11:59:50 AM EET |
| Sample Type:      | Standard          | Acq. Method Set:    | Seria Etil_Cl 7 93        |
| Vial:             | 1                 | Date Processed:     | 4/10/2023 4:23:38 PM EEST |
| Injection #:      | 1                 | Processing Method:  | Seria Etil_Cl 7 93        |
| Injection Volume: | 10.00 ul          | Channel Name:       | Extract 275               |
| Run Time:         | 35.0 Minutes      | Proc. Chnl. Descr.: | 2998 PDA 275.0 nm (2998)  |
| Acquired By:      | roman_roxana      |                     |                           |

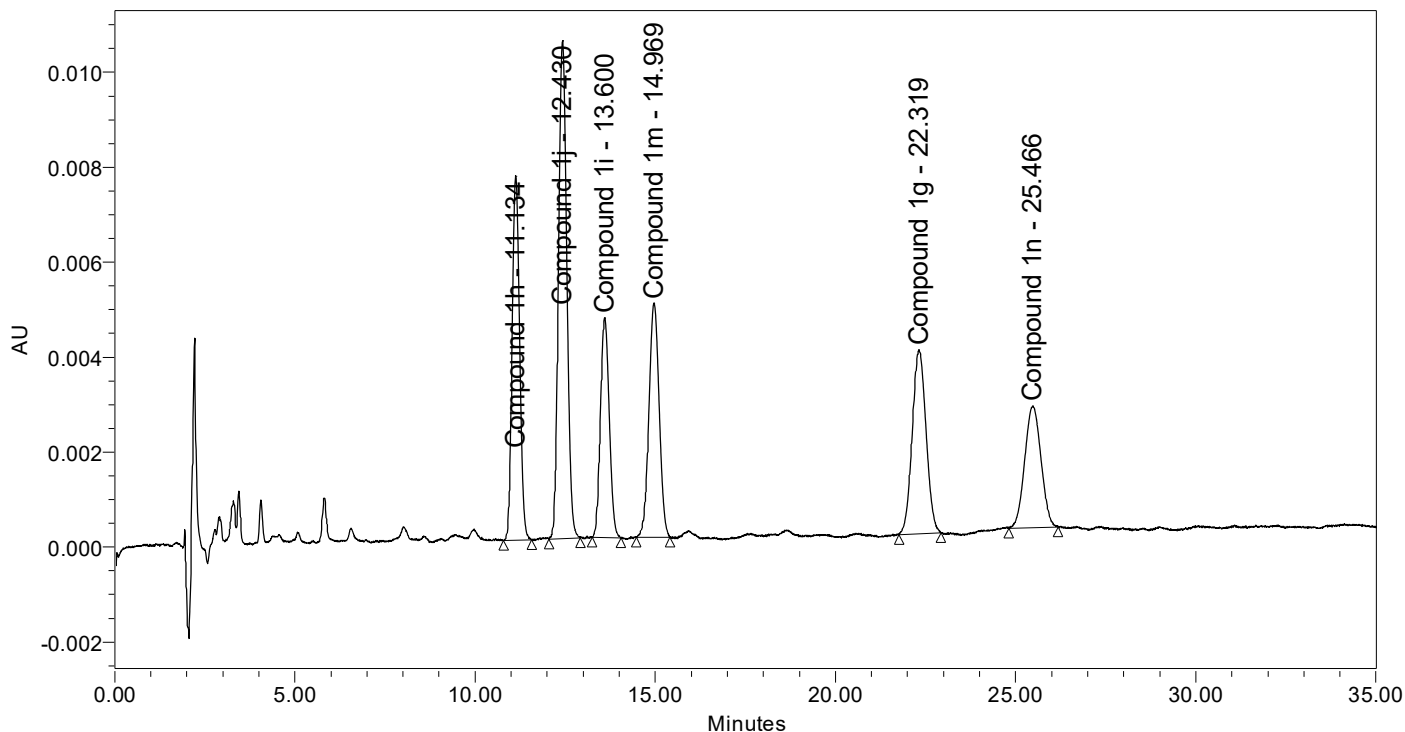

|   | Peak Name   | RT     | Area   | Height (μV) | Resolution |
|---|-------------|--------|--------|-------------|------------|
| 1 | Compound 1h | 11.134 | 110465 | 7671        |            |
| 2 | Compound 1j | 12.430 | 167189 | 10488       | 3.23       |
| 3 | Compound 1i | 13.600 | 79261  | 4627        | 2.67       |
| 4 | Compound 1m | 14.969 | 96692  | 4931        | 2.82       |
| 5 | Compound 1g | 22.319 | 104951 | 3874        | 11.88      |

|   | Peak Name   | RT     | Area  | Height (μV) | Resolution |
|---|-------------|--------|-------|-------------|------------|
| 6 | Compound 1n | 25.466 | 79517 | 2562        | 4.05       |



**Quantitative determination of**  
***compounds 1g, 1h, 1i, 1j, 1m, 1n***  
**- Validation of the analytical method -**

**Robustness**  
**Mobile phase**  
**Solvent A: Solvent B (91: 9, V/V)**

# Chloride\_Ethyl\_Robustness

Reported by User: Roman Roxana (roman\_roxana)  
 Acquisition Server: Waters-cd3  
 Project Name: Teste\Thiazides  
 Sample Set Name: Seria Etil\_Cl Robustness  
 Code column: Inertsil ODS-3 250\*4.6 mm 5um LA140

## SAMPLE INFORMATION

|                   |                   |                     |                           |
|-------------------|-------------------|---------------------|---------------------------|
| Sample Name:      | Solution 5 ug/ mL | Date Acquired:      | 2/13/2023 3:15:14 PM EET  |
| Sample Type:      | Standard          | Acq. Method Set:    | Seria Etil_Cl 9 91        |
| Vial:             | 1                 | Date Processed:     | 4/10/2023 4:41:33 PM EEST |
| Injection #:      | 1                 | Processing Method:  | Seria Etil_Cl 9 91        |
| Injection Volume: | 10.00 ul          | Channel Name:       | Extract 275               |
| Run Time:         | 35.0 Minutes      | Proc. Chnl. Descr.: | 2998 PDA 275.0 nm (2998)  |
| Acquired By:      | roman_roxana      |                     |                           |

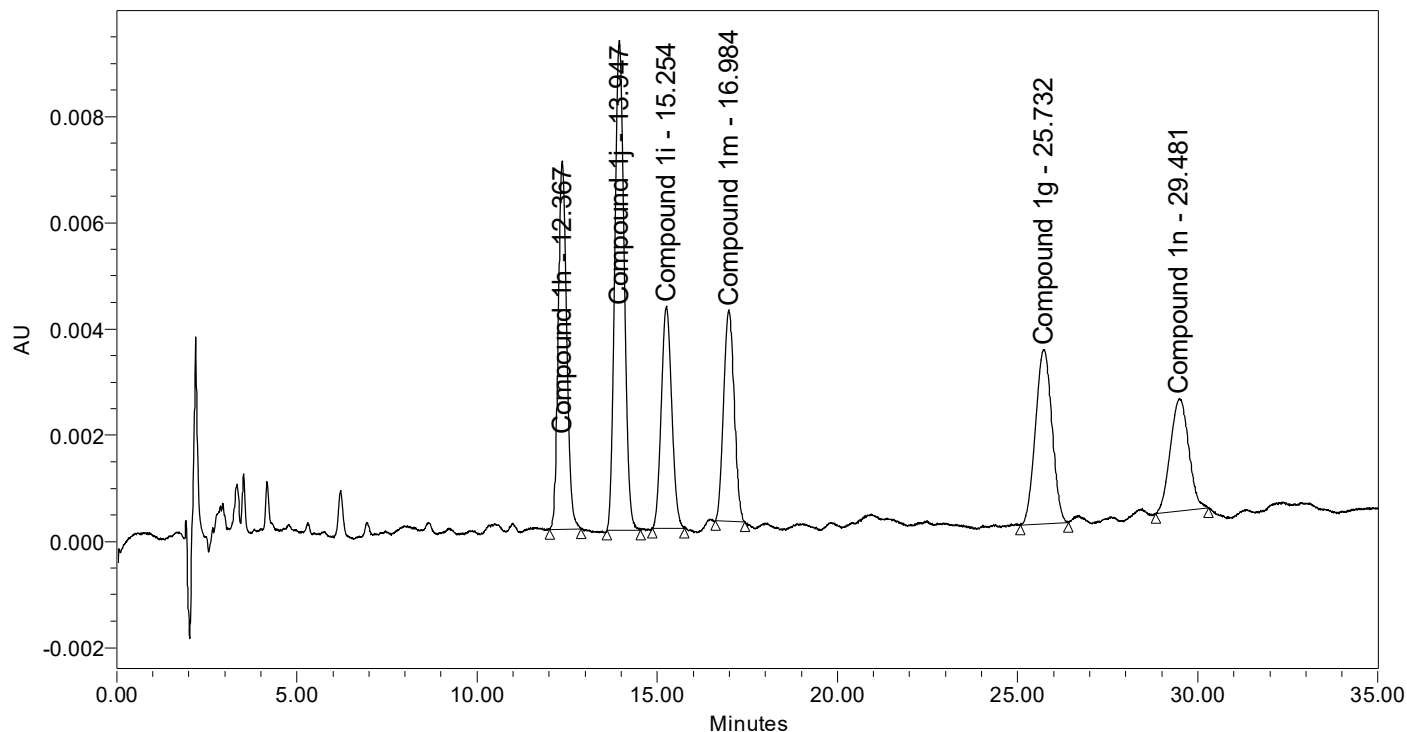

|   | Peak Name   | RT     | Area   | Height (μV) | Resolution |
|---|-------------|--------|--------|-------------|------------|
| 1 | Compound 1h | 12.367 | 113647 | 6929        |            |
| 2 | Compound 1j | 13.947 | 164894 | 9216        | 3.49       |
| 3 | Compound 1i | 15.254 | 83100  | 4182        | 2.60       |
| 4 | Compound 1m | 16.984 | 82081  | 3977        | 3.18       |
| 5 | Compound 1g | 25.732 | 104489 | 3277        | 12.37      |

|   | Peak Name   | RT     | Area  | Height (μV) | Resolution |
|---|-------------|--------|-------|-------------|------------|
| 6 | Compound 1n | 29.481 | 75218 | 2123        | 4.16       |

**Quantitative determination of**  
***compounds 1g, 1h, 1i, 1j, 1m, 1n***  
**- Validation of the analytical method -**

**Robustness**  
**Mobile phase**  
**Solvent A: Solvent B (95: 5, V/V)**

# Chloride\_Ethyl\_Robustness

Reported by User: Roman Roxana (roman\_roxana)  
 Acquisition Server: Waters-cd3  
 Project Name: Teste\Thiazides  
 Sample Set Name: Seria Etil\_Cl Robustness  
 Code column: Inertsil ODS-3 250\*4.6 mm 5um LA140

## SAMPLE INFORMATION

|                   |                   |                     |                           |
|-------------------|-------------------|---------------------|---------------------------|
| Sample Name:      | Solution 5 ug/ mL | Date Acquired:      | 2/13/2023 11:14:02 AM EET |
| Sample Type:      | Standard          | Acq. Method Set:    | Seria Etil_Cl 5 95        |
| Vial:             | 1                 | Date Processed:     | 4/10/2023 4:17:20 PM EEST |
| Injection #:      | 1                 | Processing Method:  | Seria Etil_Cl 5 95        |
| Injection Volume: | 10.00 ul          | Channel Name:       | Extract 275               |
| Run Time:         | 35.0 Minutes      | Proc. Chnl. Descr.: | 2998 PDA 275.0 nm (2998)  |
| Acquired By:      | roman_roxana      |                     |                           |

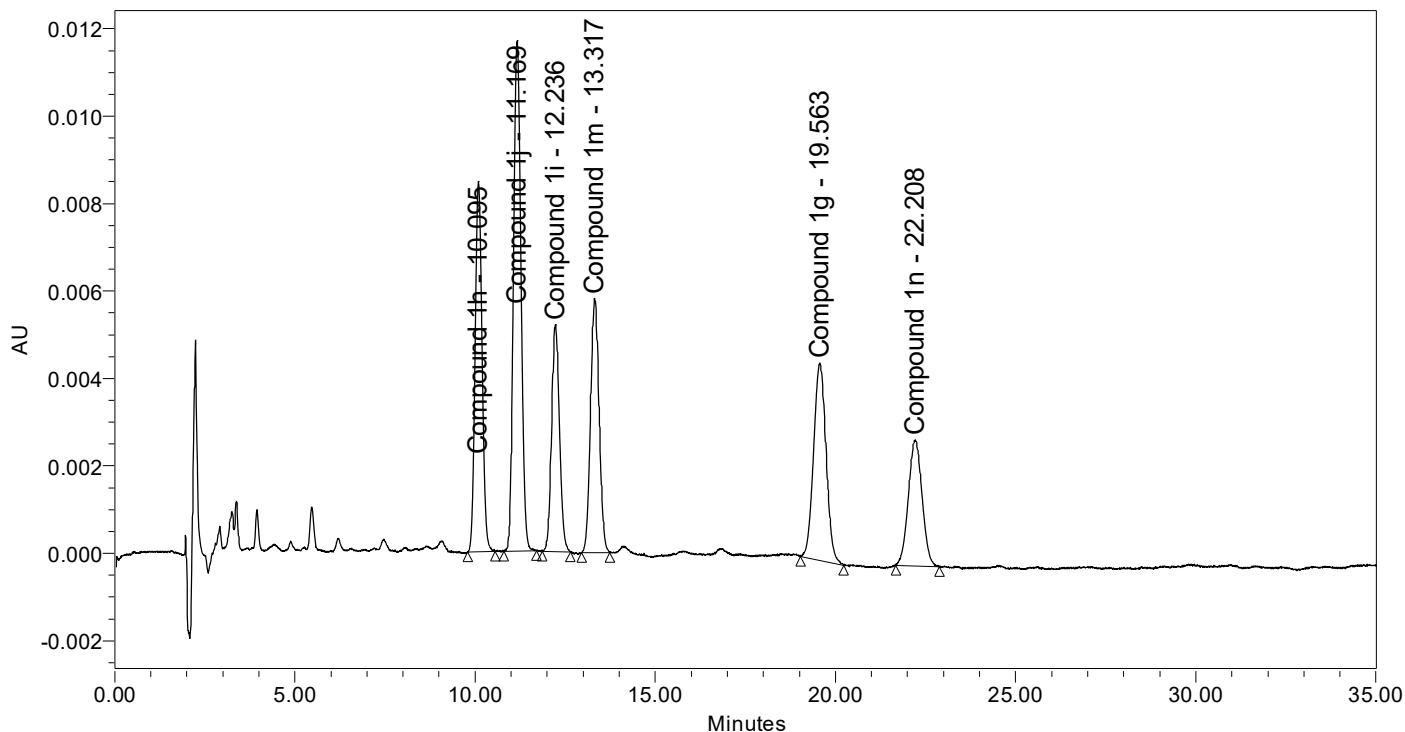

|   | Peak Name   | RT     | Area   | Height (μV) | Resolution |
|---|-------------|--------|--------|-------------|------------|
| 1 | Compound 1h | 10.095 | 111974 | 8478        |            |
| 2 | Compound 1j | 11.169 | 167336 | 11672       | 2.96       |
| 3 | Compound 1i | 12.236 | 81377  | 5197        | 2.69       |
| 4 | Compound 1m | 13.317 | 98448  | 5805        | 2.50       |
| 5 | Compound 1g | 19.563 | 110102 | 4512        | 11.42      |

|   | Peak Name   | RT     | Area  | Height (μV) | Resolution |
|---|-------------|--------|-------|-------------|------------|
| 6 | Compound 1n | 22.208 | 77931 | 2888        | 3.87       |

**Quantitative determination of**  
***compounds 1g, 1h, 1i, 1j, 1m, 1n***  
**- Validation of the analytical method -**

**Robustness**  
**Flow 0.8 mL/ min.**

# Chloride\_Ethyl\_Robustness

Reported by User: Roman Roxana (roman\_roxana)  
 Acquisition Server: Waters-cd3  
 Project Name: Teste\Thiazides  
 Sample Set Name: Seria Etil\_CI Robustness  
 Code column: Inertsil ODS-3 250\*4.6 mm 5um LA140

## SAMPLE INFORMATION

|                   |                   |                     |                             |
|-------------------|-------------------|---------------------|-----------------------------|
| Sample Name:      | Solution 5 ug/ mL | Date Acquired:      | 2/13/2023 12:46:09 PM EET   |
| Sample Type:      | Standard          | Acq. Method Set:    | Seria Etil_CI 7 93 flow 0 8 |
| Vial:             | 1                 | Date Processed:     | 4/10/2023 4:28:50 PM EEST   |
| Injection #:      | 1                 | Processing Method:  | Seria Etil_CI 7 93 flow 0 8 |
| Injection Volume: | 10.00 ul          | Channel Name:       | Extract 275                 |
| Run Time:         | 35.0 Minutes      | Proc. Chnl. Descr.: | 2998 PDA 275.0 nm (2998)    |
| Acquired By:      | roman_roxana      |                     |                             |

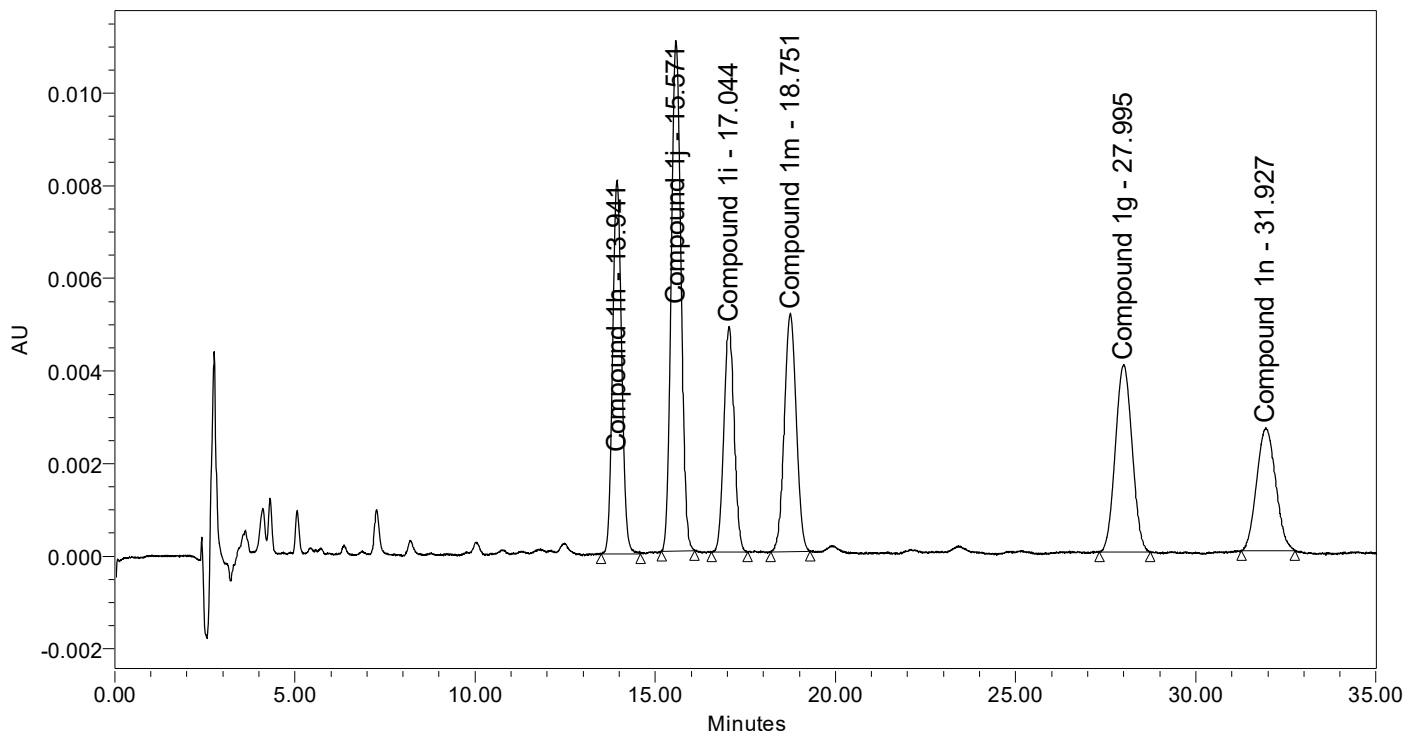

|   | Peak Name   | RT     | Area   | Height (μV) | Resolution |
|---|-------------|--------|--------|-------------|------------|
| 1 | Compound 1h | 13.941 | 137904 | 8070        |            |
| 2 | Compound 1j | 15.571 | 205283 | 11020       | 3.46       |
| 3 | Compound 1i | 17.044 | 98551  | 4869        | 2.85       |
| 4 | Compound 1m | 18.751 | 118429 | 5145        | 2.99       |
| 5 | Compound 1g | 27.995 | 129613 | 4049        | 12.66      |

|   | Peak Name   | RT     | Area  | Height (μV) | Resolution |
|---|-------------|--------|-------|-------------|------------|
| 6 | Compound 1n | 31.927 | 97198 | 2656        | 4.28       |

**Quantitative determination of**  
***compounds 1g, 1h, 1i, 1j, 1m, 1n***  
**- Validation of the analytical method -**

**Robustness**  
**Flow 1.2 mL/ min.**

# Chloride\_Ethyl\_Robustness

Reported by User: Roman Roxana (roman\_roxana)  
 Acquisition Server: Waters-cd3  
 Project Name: Teste\Thiazides  
 Sample Set Name: Seria Etil\_Cl Robustness  
 Code column: Inertsil ODS-3 250\*4.6 mm 5um LA140

## SAMPLE INFORMATION

|                   |                   |                     |                             |
|-------------------|-------------------|---------------------|-----------------------------|
| Sample Name:      | Solution 5 ug/ mL | Date Acquired:      | 2/13/2023 1:32:00 PM EET    |
| Sample Type:      | Standard          | Acq. Method Set:    | Seria Etil_Cl 7 93 flow 1 2 |
| Vial:             | 1                 | Date Processed:     | 4/10/2023 4:34:26 PM EEST   |
| Injection #:      | 1                 | Processing Method:  | Seria Etil_Cl 7 93 flow 1 2 |
| Injection Volume: | 10.00 ul          | Channel Name:       | Extract 275                 |
| Run Time:         | 35.0 Minutes      | Proc. Chnl. Descr.: | 2998 PDA 275.0 nm (2998)    |
| Acquired By:      | roman_roxana      |                     |                             |

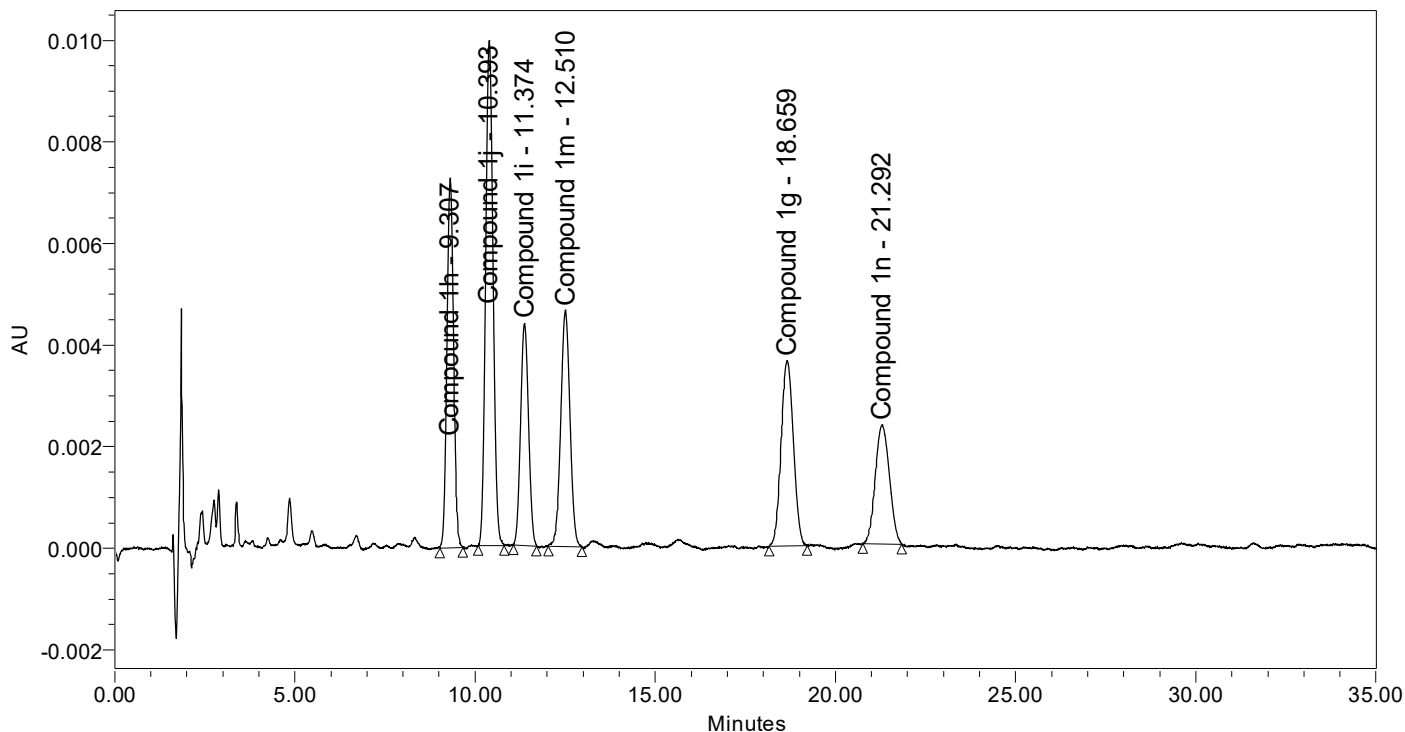

|   | Peak Name   | RT     | Area   | Height (μV) | Resolution |
|---|-------------|--------|--------|-------------|------------|
| 1 | Compound 1h | 9.307  | 92549  | 7268        |            |
| 2 | Compound 1j | 10.393 | 139910 | 9940        | 3.06       |
| 3 | Compound 1i | 11.374 | 66095  | 4375        | 2.53       |
| 4 | Compound 1m | 12.510 | 81728  | 4651        | 2.64       |
| 5 | Compound 1g | 18.659 | 86930  | 3646        | 11.21      |

|   | Peak Name   | RT     | Area  | Height (μV) | Resolution |
|---|-------------|--------|-------|-------------|------------|
| 6 | Compound 1n | 21.292 | 64028 | 2355        | 3.83       |



**Quantitative determination of**  
***compounds 1g, 1h, 1i, 1j, 1m, 1n***  
**- Validation of the analytical method -**

**Robustness**  
**Column temperature: 35 °C**

# Chloride\_Ethyl\_Robustness

Reported by User: Roman Roxana (roman\_roxana)  
 Acquisition Server: Waters-cd3  
 Project Name: Teste\Thiazides  
 Sample Set Name: Seria Etil\_Cl Robustness  
 Code column: Inertsil ODS-3 250\*4.6 mm 5um LA140

## SAMPLE INFORMATION

|                   |                   |                     |                                |
|-------------------|-------------------|---------------------|--------------------------------|
| Sample Name:      | Solution 5 ug/ mL | Date Acquired:      | 2/13/2023 2:27:48 PM EET       |
| Sample Type:      | Unknown           | Acq. Method Set:    | Seria Etil_Cl 7 93 temperature |
| Vial:             | 1                 | Date Processed:     | 4/10/2023 4:38:28 PM EEST      |
| Injection #:      | 1                 | Processing Method:  | Seria Etil_Cl 7 93 temperature |
| Injection Volume: | 10.00 ul          | Channel Name:       | Extract 275                    |
| Run Time:         | 35.0 Minutes      | Proc. Chnl. Descr.: | 2998 PDA 275.0 nm (2998)       |
| Acquired By:      | roman_roxana      |                     |                                |

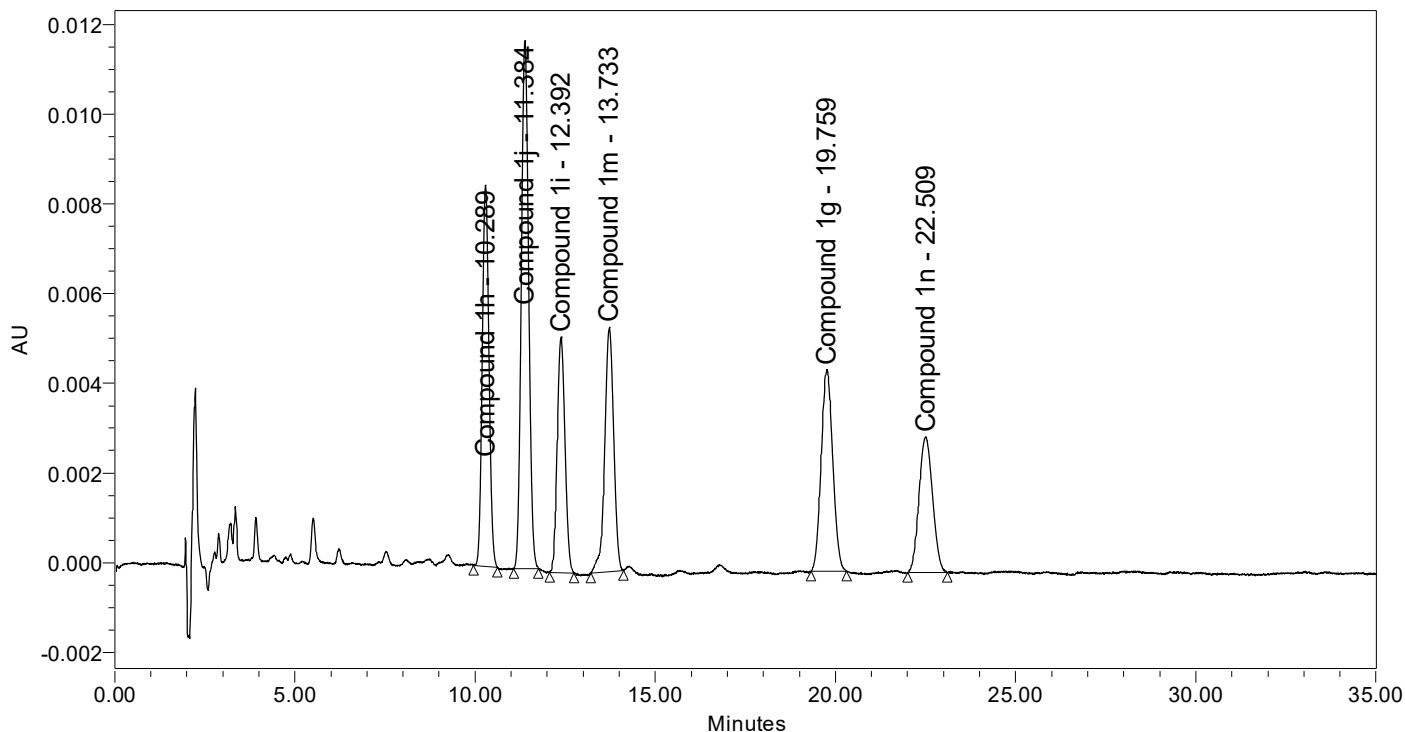

|   | Peak Name   | RT     | Area   | Height (μV) | Resolution |
|---|-------------|--------|--------|-------------|------------|
| 1 | Compound 1h | 10.289 | 108303 | 8504        |            |
| 2 | Compound 1j | 11.384 | 163318 | 11767       | 3.10       |
| 3 | Compound 1i | 12.392 | 78388  | 5255        | 2.63       |
| 4 | Compound 1m | 13.733 | 93360  | 5447        | 3.20       |
| 5 | Compound 1g | 19.759 | 102791 | 4493        | 11.42      |

|   | Peak Name   | RT     | Area  | Height (μV) | Resolution |
|---|-------------|--------|-------|-------------|------------|
| 6 | Compound 1n | 22.509 | 79335 | 3021        | 4.19       |

# <sup>1</sup>H-NMR and <sup>13</sup>C-NMR spectra for the compounds 1a – 1o

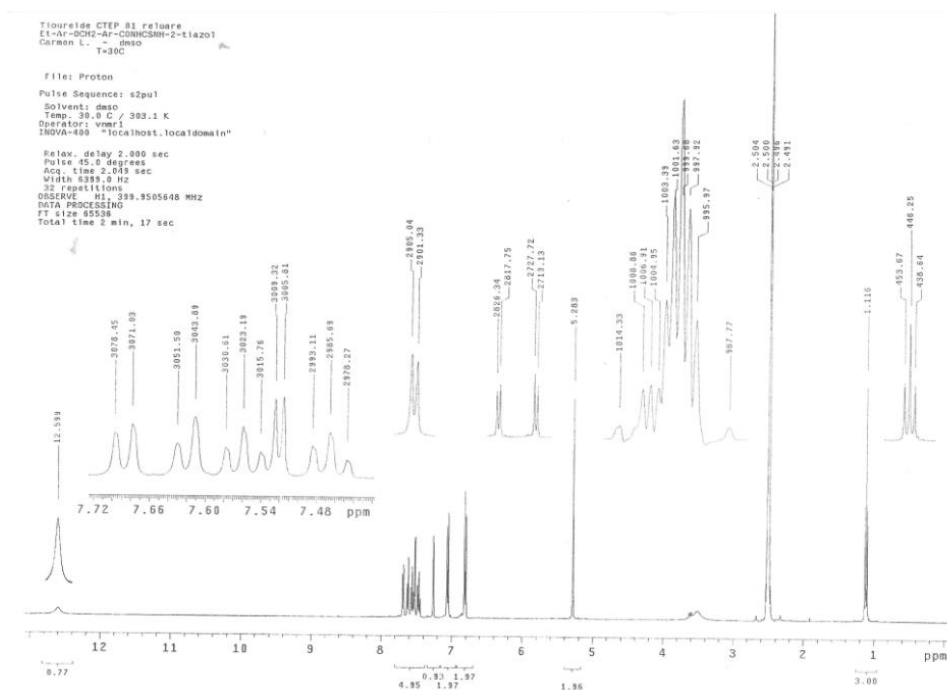

Figure S14. <sup>1</sup>H-NMR for the compound 1a

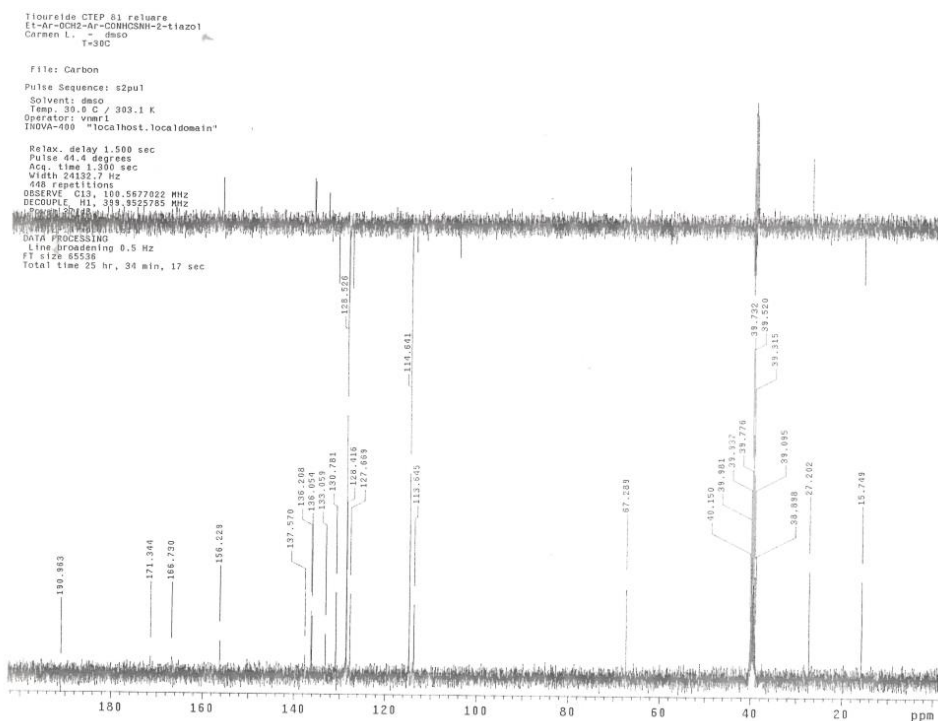





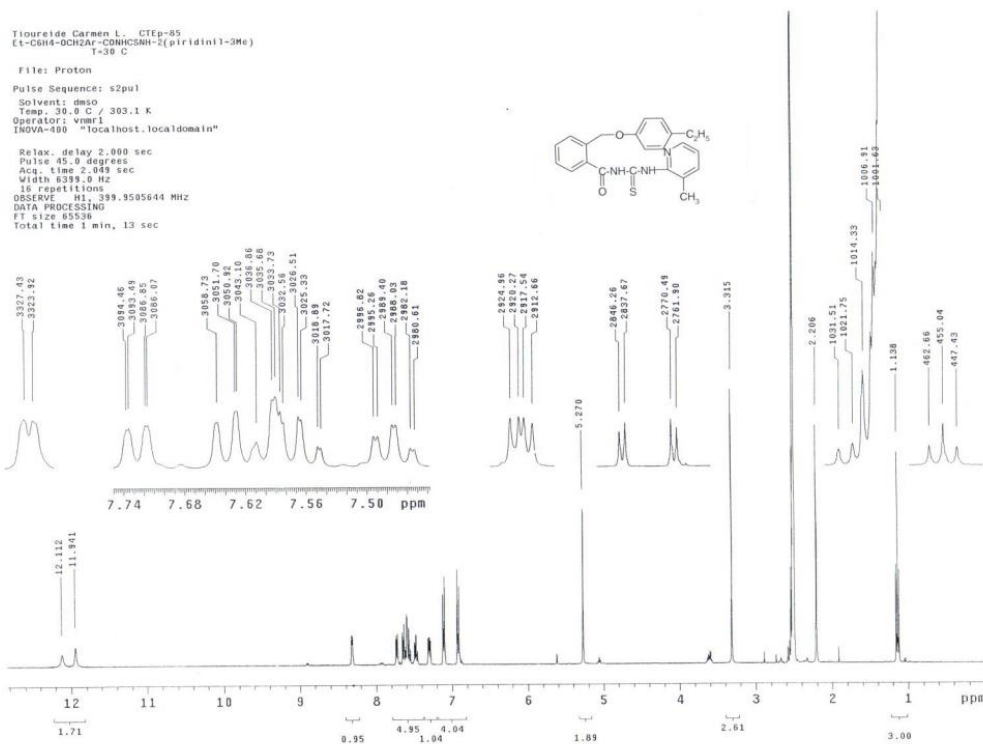

Figure S20. <sup>1</sup>H- NMR for the compound **1d**

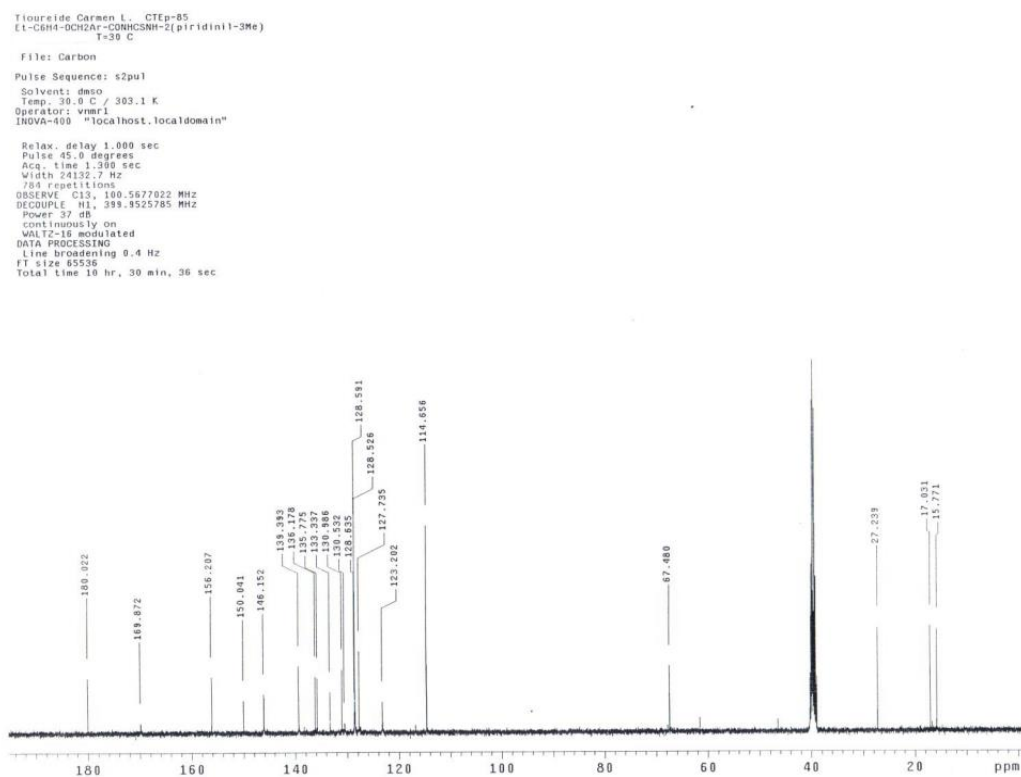

Figure S21. <sup>13</sup>C- NMR for the compound **1d**

Tioureide Carmen L. CTEp-86  
4Et-C6H4-OCH2-Ar-CONHCSNH-2(pyr-4Me)  
T-39C

File: Proton  
Pulse Sequence: s2pul  
Solvent: dms  
Temp. 30.0 C / 303.1 K  
Operator: vnmr1  
INOVA-400 "localhost.localdomain"

Relax. delay 2.000 sec  
Pulse 45.0 degrees  
Acq. time 2.049 sec  
Width 6399.0 Hz  
16 repetitions  
OBSERVE H1, 399.9505651 MHz  
DATA PROCESSING  
FT size 65536  
Total time 1 min, 13 sec

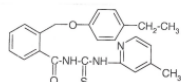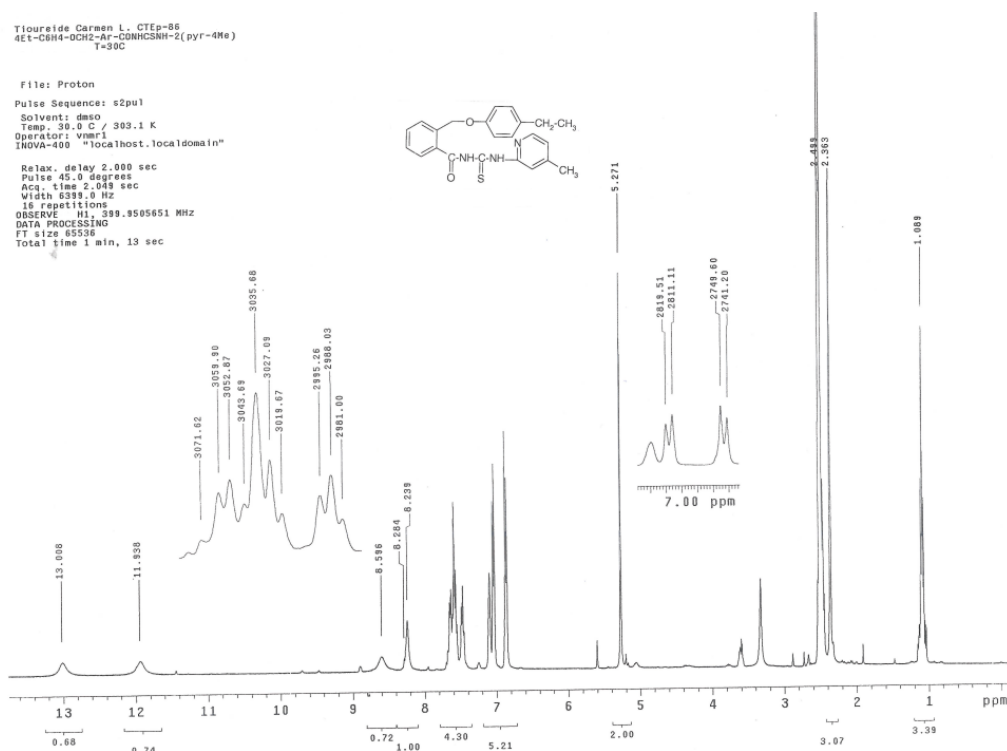

Figure S22.  $^1\text{H}$ - NMR for the compound **1e**

Tioureide Carmen L. CTEp-86  
4Et-C6H4-OCH2-Ar-CONHCSNH-2(pyr-4Me)  
T-39C

File: Carbon  
Pulse Sequence: s2pul  
Solvent: dms  
Temp. 30.0 C / 303.1 K  
Operator: vnmr1  
INOVA-400 "localhost.localdomain"

Relax. delay 1.000 sec  
Pulse 45.0 degrees  
Acq. time 1.300 sec  
Width 24132.7 Hz  
1468 repetitions  
OBSERVE C13, 100.5677029 MHz  
DECOUPLE H1, 399.9525785 MHz  
Power 37 dB  
VOLTAGE MODULATOR  
DATA PROCESSING  
Line broadening 0.4 Hz  
FT size 65536  
Total time 10 hr, 30 min, 36 sec

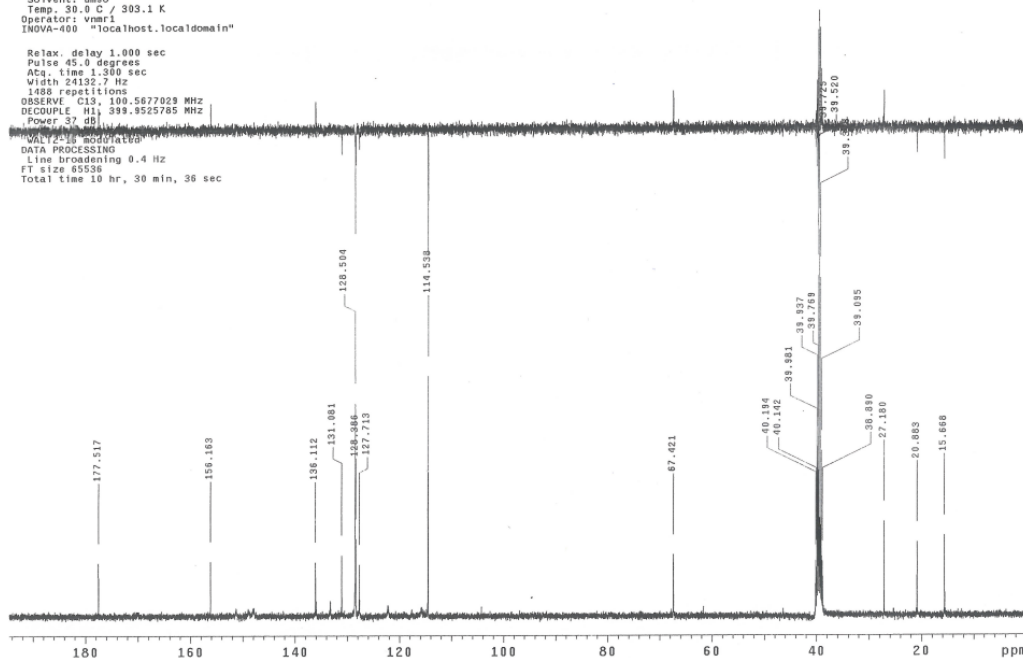

Figure S23.  $^{13}\text{C}$ - NMR for the compound **1e**





Relax. delay 2.000 sec  
Pulse 45.0 degrees  
Acq. time 2.049 sec  
Width 6399.0 Hz  
32 repetitions  
OBSERVE H1, 399.9505647 MHz  
DATA PROCESSING  
FT size 65536  
Total time 2 min, 17 sec

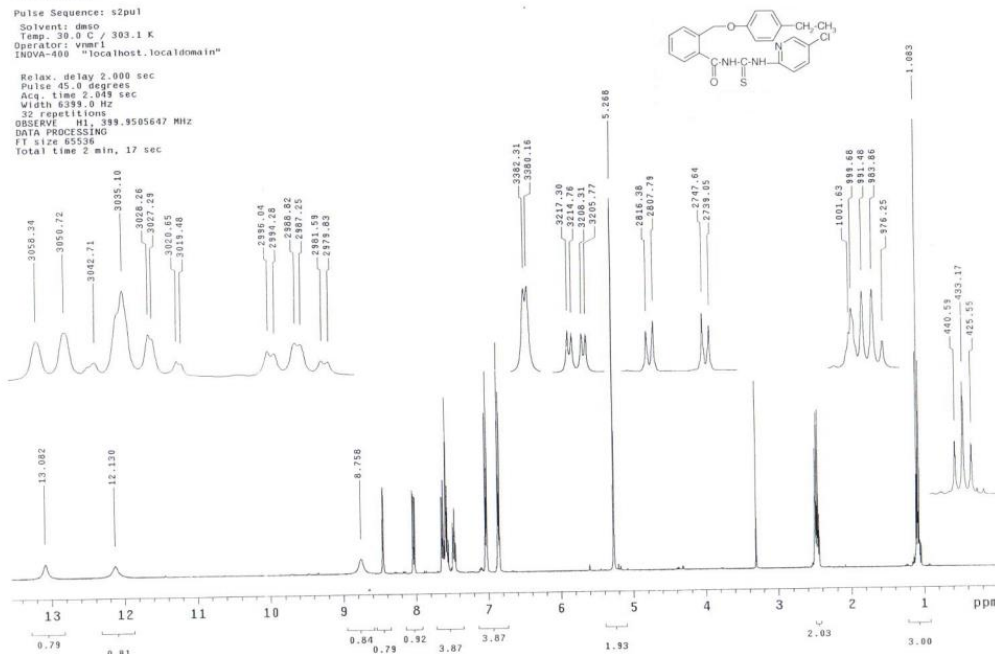

Figure S26.  $^1\text{H}$ - NMR for the compound **1g**

Tioureide Carmen L. CTEp-89  
4Et-C6H4-OCH2-Ar-CONHCSNH-2(pyr-5C1)  
T=30C

```
File: Carbon
Pulse Sequence: s2pul
Solvent: dmsd
Temp. 30.0 C / 303.1 K
Operator: vnmr1
INOVA-400 "localhost.localdomain"
```

```
Relax. delay 1.000 sec
Pulse 45.0 degrees
Acq. time 1.300 sec
Width 24132.7 Hz
1136 repetitions
OBSERVE C13, 100, 5677036 MHz
Power 37 dB
continuously on
WALTZ-16 modulated
DATA PROCESSING
Line broadening 0.4 Hz
FI size 65536
Total time 10 hr, 30 min, 36 sec
```

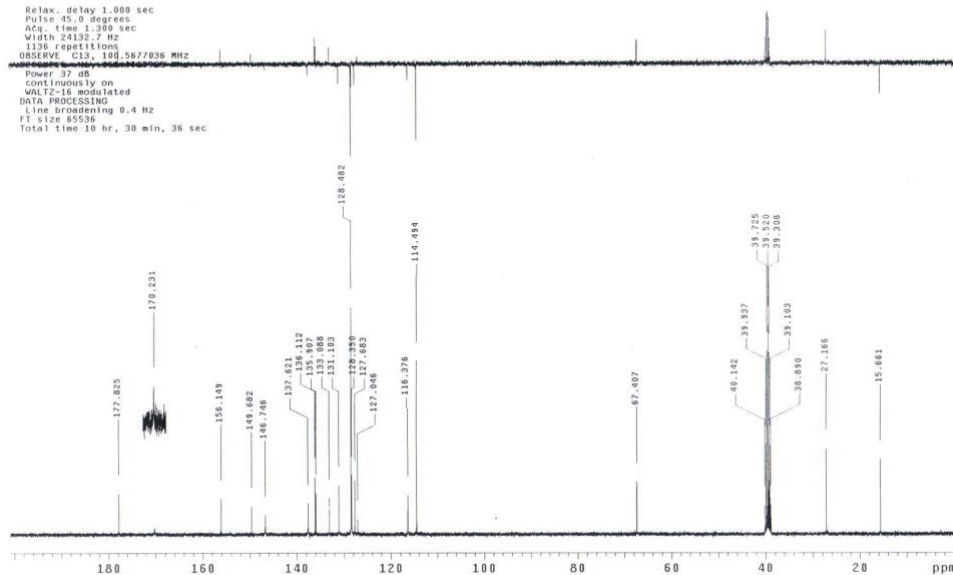

Figure S27.  $^{13}\text{C}$ - NMR for the compound **1g**

Tioureide Carmen L. CTep-90  
4Et-C6H4-OC(=O)-Ar-CONHCSNH-3(pyr-2C1)  
T=30C

File: Proton

Pulse Sequence: s2pu1

Solvent: dms

Temp: 30.0 C / 303.1 K

Operator: vnmr1

INNOVA-400 "localhost.localdomain"

Relax. delay 2.000 sec

Pulse 45.0 degrees

Acq. time 2.049 sec

Width 6399.0 Hz

32 repetitions

OBSERVE H1, 399.9585627 MHz

DATA PROCESSING

FT size 65536

Total time 2 min, 17 sec

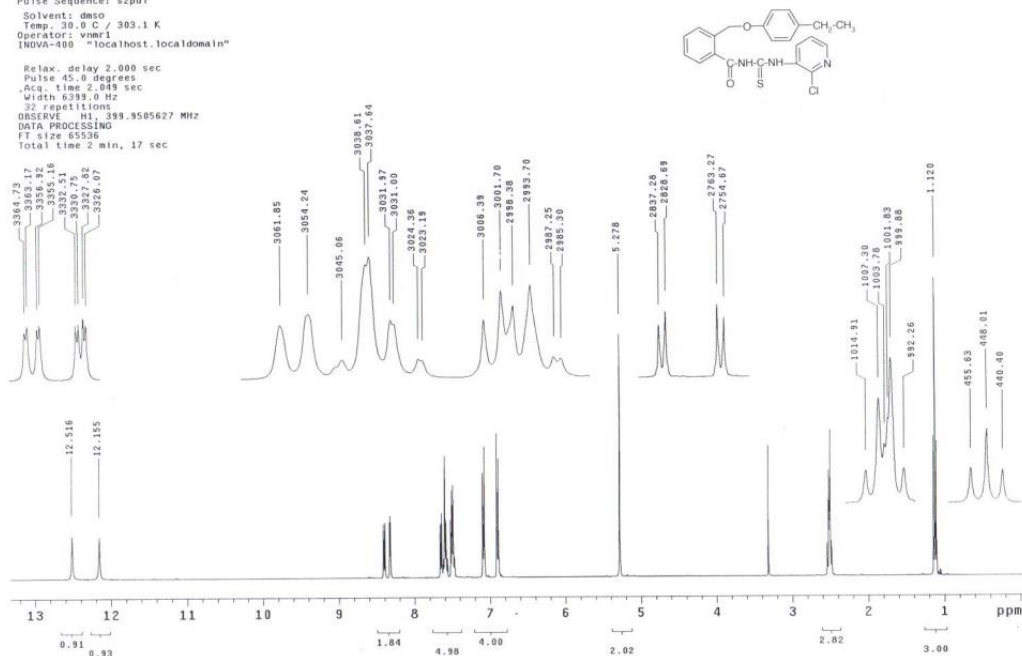

Figure S28. <sup>1</sup>H- NMR for the compound **1h**

Tioureide Carmen L. CTep-90  
4Et-C6H4-OC(=O)-Ar-CONHCSNH-3(pyr-2C1)  
T=30C

File: CTep-90-OC

Pulse Sequence: s2pu1

Solvent: dms

Temp: 30.0 C / 303.1 K

Operator: vnmr1

File: CTep-90-OC

INNOVA-400 "localhost.localdomain"

Relax. delay 3.000 sec

Pulse 45.0 degrees

Acq. time 1.300 sec

Width 24132.7 Hz

1000 repetitions

OBSERVE H1, 399.9525785 MHz

DECOUPLE H1, 399.9525785 MHz

Power 39 dB

continuously on

WALTZ-16 modulated

line broadening 0.4 Hz

DATA PROCESSING

FT size 65536

Total time 19 hr, 36 min, 44 sec

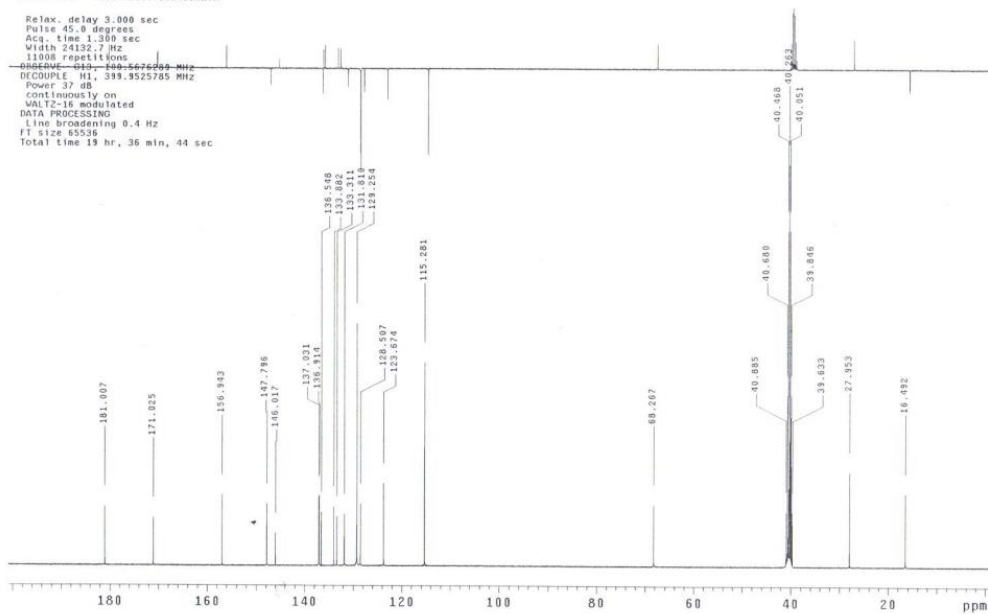

Figure S29. <sup>13</sup>C- NMR for the compound **1h**

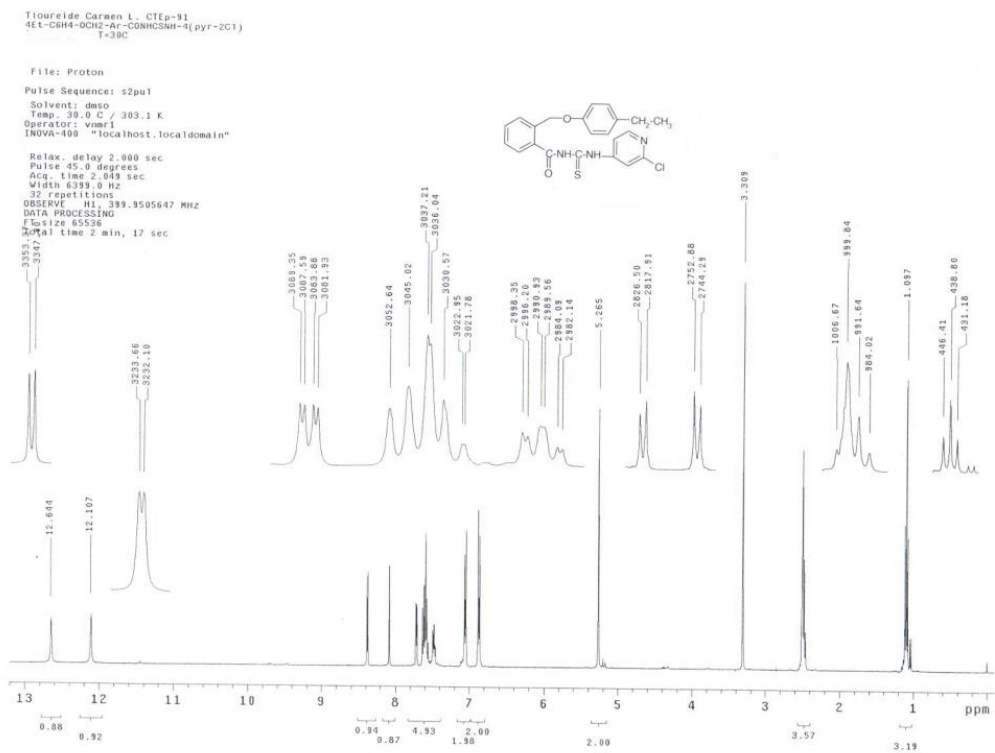

Figure S30. <sup>1</sup>H- NMR for the compound **1i**

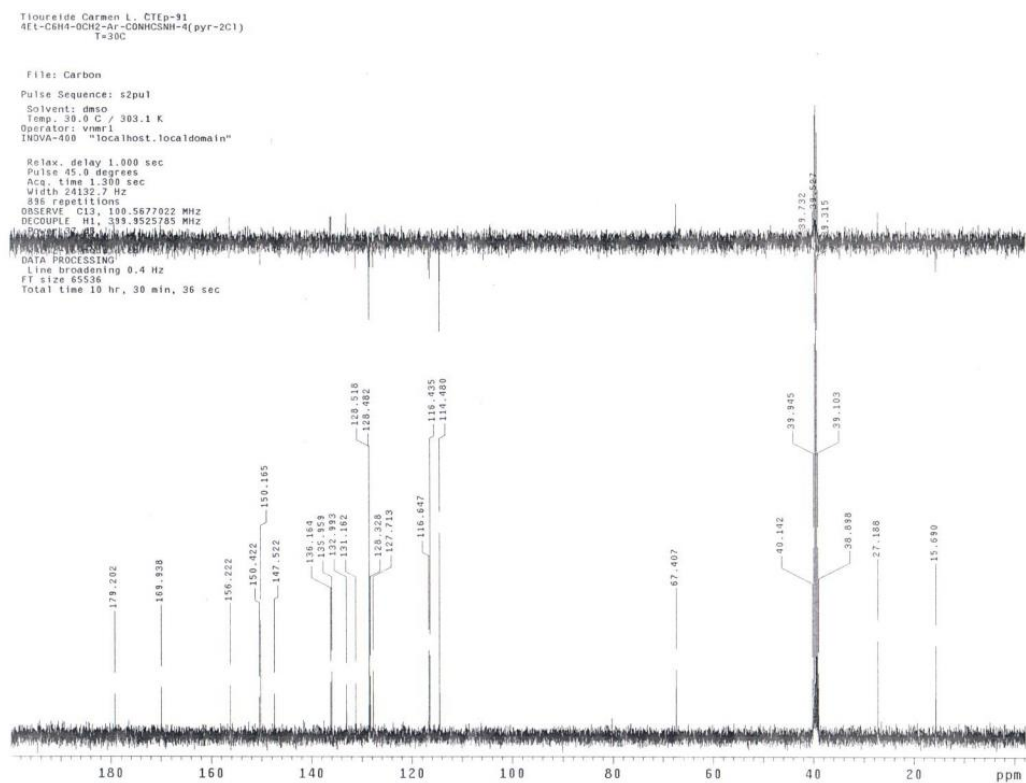

Figure S31. <sup>13</sup>C- NMR for the compound **1i**

O=C(NC(=S)NC1=CC=CC=C1COC2=CC=CC=C2)Nc3ccc(Cl)cn3

Relax. delay 2.000 sec  
Pulse 45.0 degrees  
Acq. time 2.049 sec  
Width 6399.0 Hz  
32 repetitions  
OBSERVE H1, 399.9505653 MHz  
DATA PROCESSING  
FT size 65536  
Total time 2 min, 17 sec

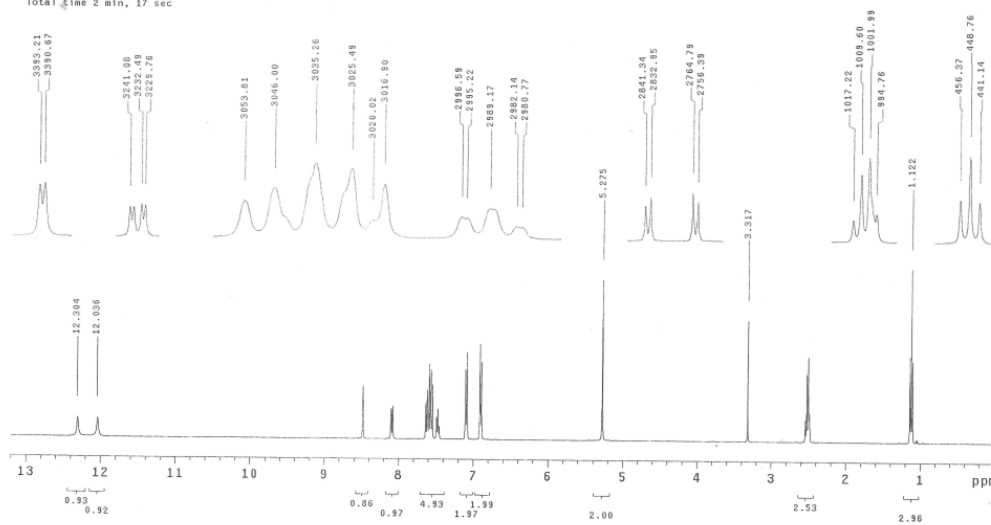

Figure S32. <sup>1</sup>H- NMR for the compound **1j**

```
File: Carbon
Pulse Sequence: s2pul
Solvent: dmsd
Temp. 30.0 C / 303.1 K
Operator: vnmr1
INOVA-400 "localhost.localdomain"
```

```
Relax. delay 1.000 sec
Pulse 45.0 degrees
Acq. time 1.300 sec
Width 24132.7 Hz
416 repetitions
OBSERVE C13, 100.5677022 MHz
DECOUPLE H1, 399.9525785 MHz
Power 37 dB
=====
WALTZ-16 modulated
DATA PROCESSING
Line broadening 0.4 Hz
FT size 65536
Total time 10 hr. 30 min. 36 sec
```

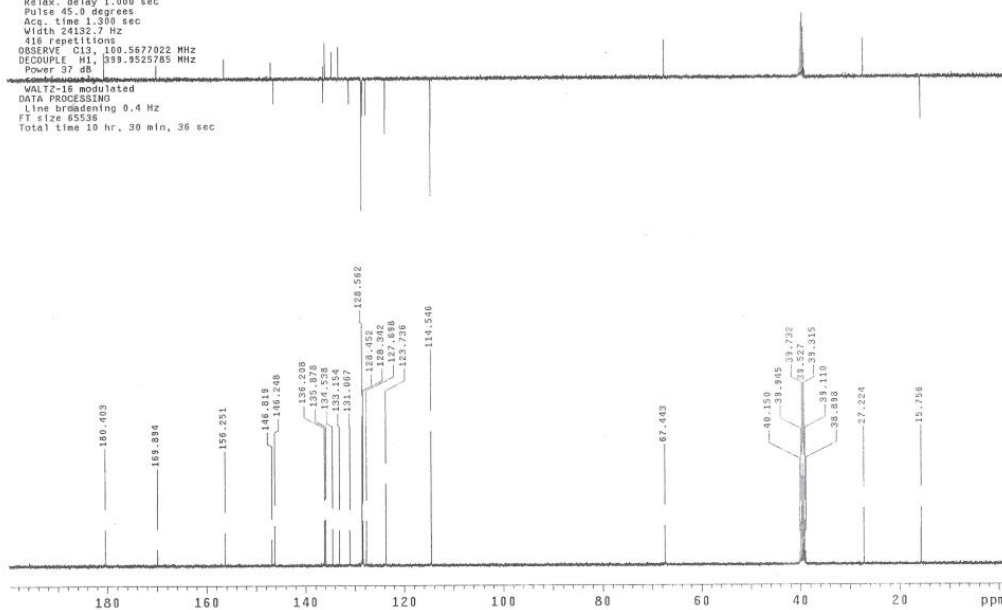

Figure S33.  $^{13}\text{C}$ - NMR for the compound **1j**

O=C(NC(=S)Nc1cccnc1)C1=CC=CC=C1COc2ccc(CCN)cc2

Figure S34. <sup>1</sup>H- NMR for the compound **1k**

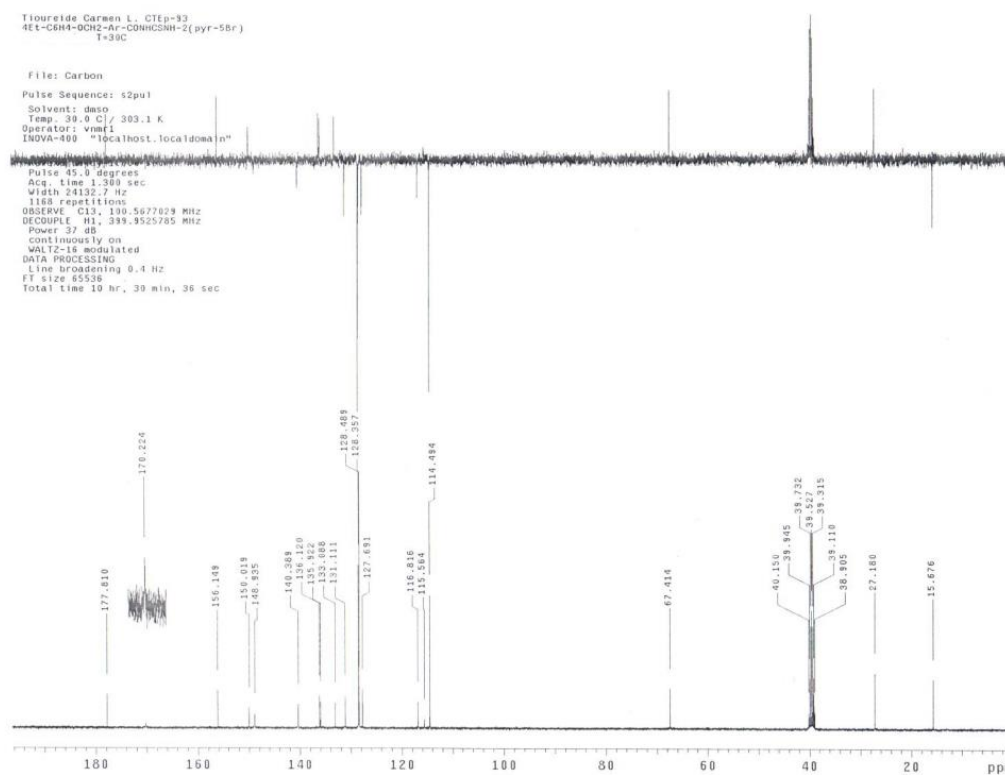

Figure S35.  $^{13}\text{C}$ - NMR for the compound **1k**

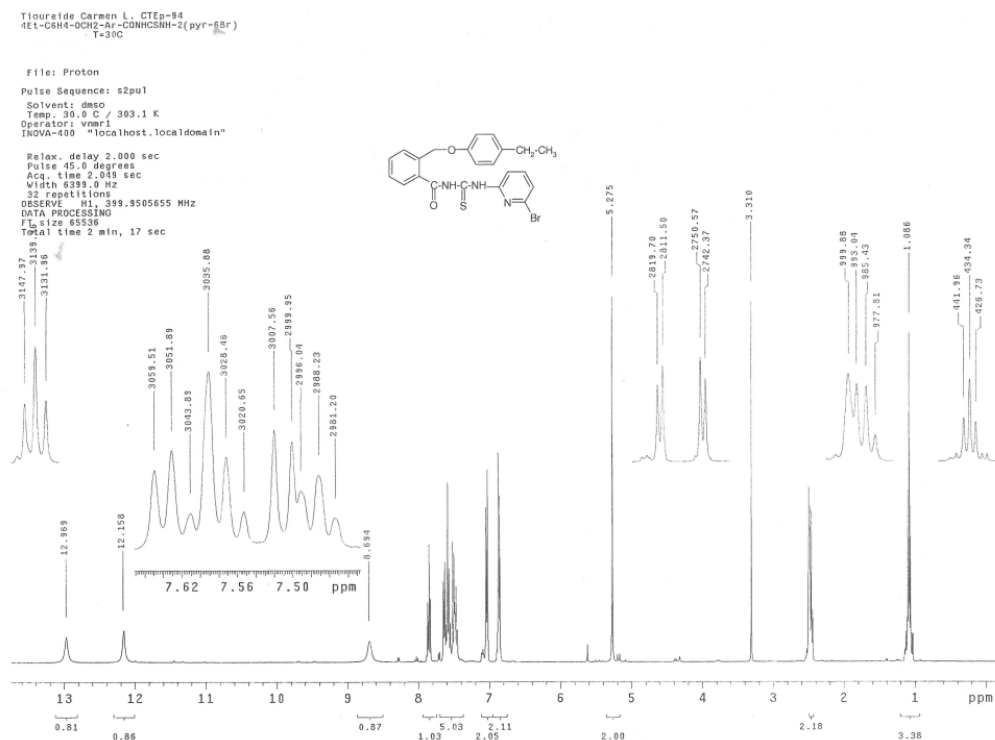

Figure S36.  $^1\text{H}$ -NMR for the compound **11**

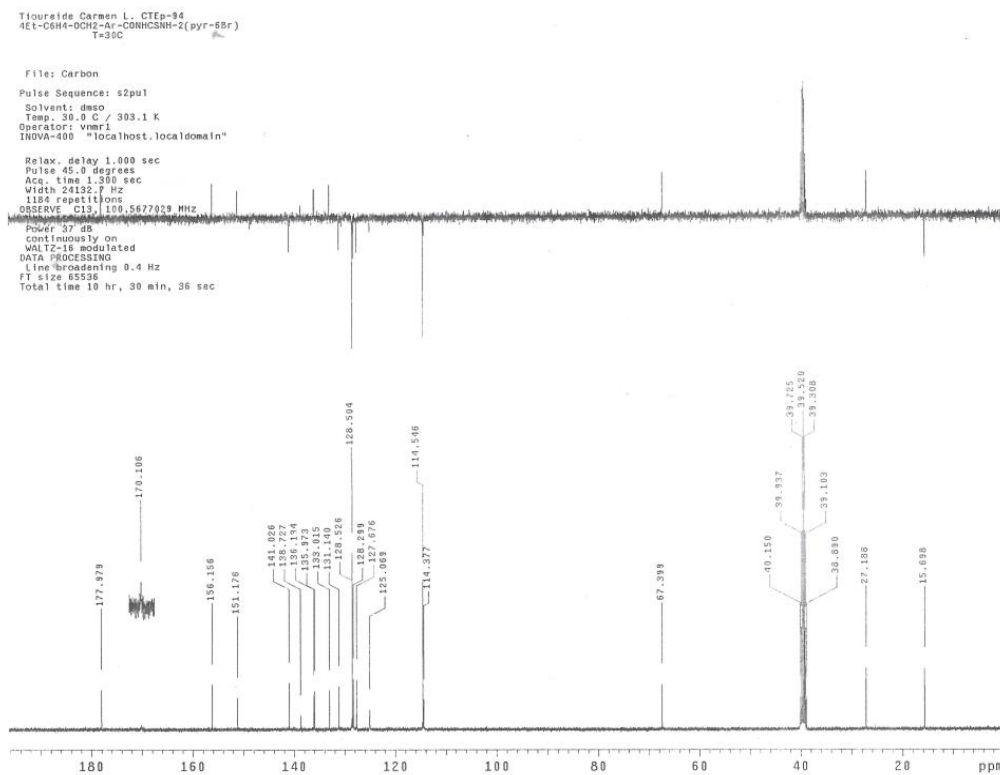

Figure S37.  $^{13}\text{C}$ -NMR for the compound **11**

Tioureide Carmen L. CTEp-95  
4Et-C6H4-OC(=O)-Ar-CONHCSNH-2(pyr-3,5Cl2)  
T=30C

File: Proton  
Pulse Sequence: s2pu1  
Solvent: dms  
Temp: 30.0 C / 303.1 K  
Operator: vmar1  
INOVA-400 "localhost.localdomain"

Relax. delay 2.000 sec  
Pulse 45.0 degrees  
Acq. time 2.049 sec  
Width 6399.0 Hz  
32 repetitions  
OBSERVE H1 399.9505653 MHz  
DATA PROCESSING  
FT size 65536  
Total time 2 min, 17 sec

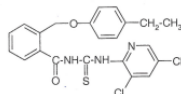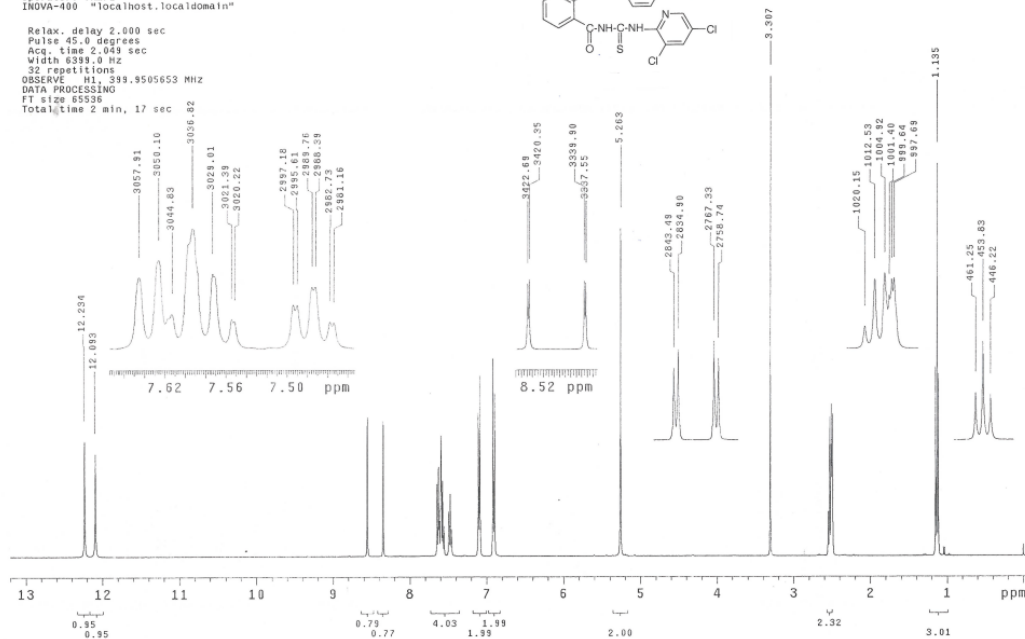

Figure S38. <sup>1</sup>H-NMR for the compound **1m**

Tioureide Carmen L. CTEp-95  
4Et-C6H4-OC(=O)-Ar-CONHCSNH-2(pyr-3,5Cl2)  
T=30C

File: Carbon  
Pulse Sequence: s2pu1  
Solvent: dms  
Temp: 30.0 C / 303.1 K  
Operator: vmar1  
INOVA-400 "localhost.localdomain"

Relax. delay 1.000 sec  
Pulse 45.0 degrees  
Acq. time 1.300 sec  
Width 24132.7 Hz  
384 repetitions  
OBSERVE C13 100.627022 MHz  
DECOUPLE H1 399.9525765 MHz  
Power 37 dB  
WALTZ-16 regulated  
DATA PROCESSING  
Line broadening 0.4 Hz  
FT size 65536  
Total time 10 hr, 30 min, 36 sec

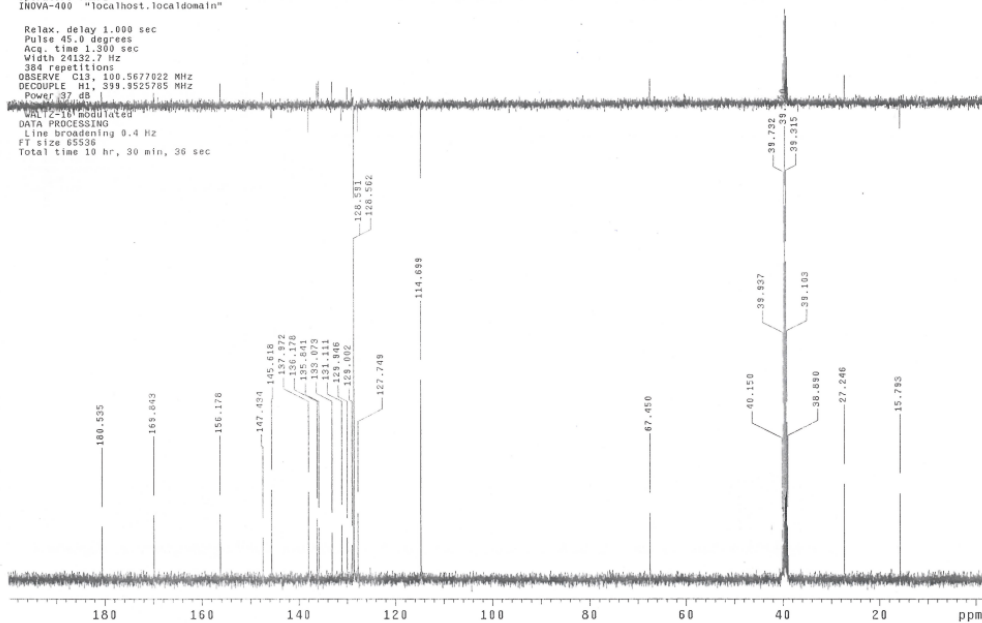

Figure S39. <sup>13</sup>C-NMR for the compound **1m**

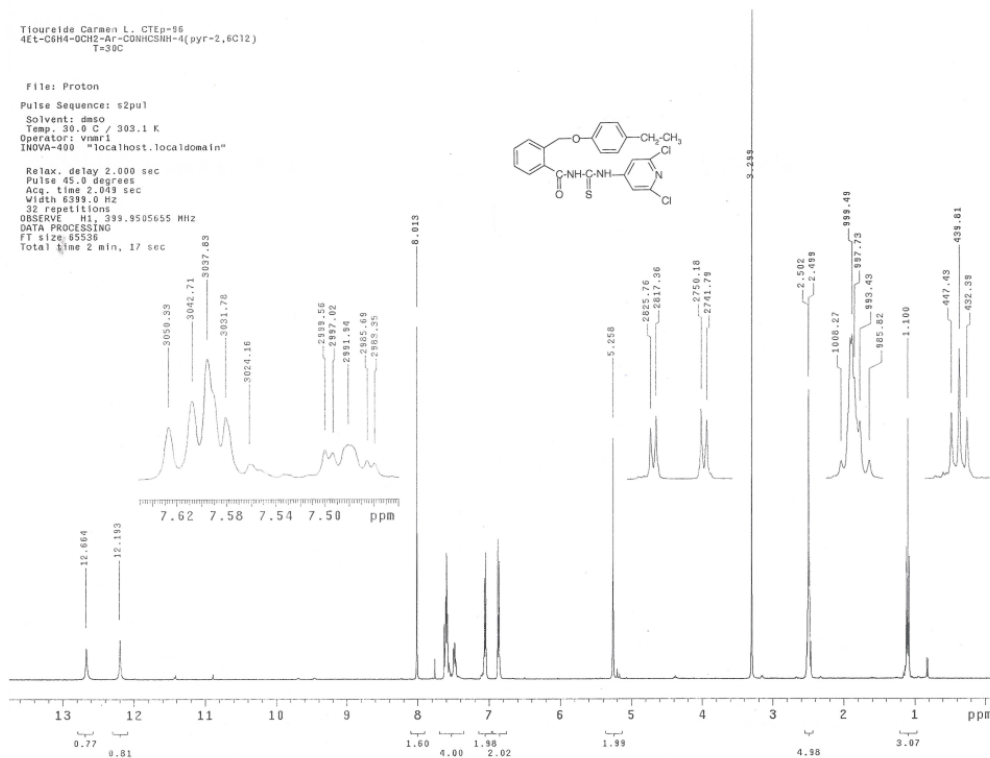

Figure S40. <sup>1</sup>H- NMR for the compound **1n**

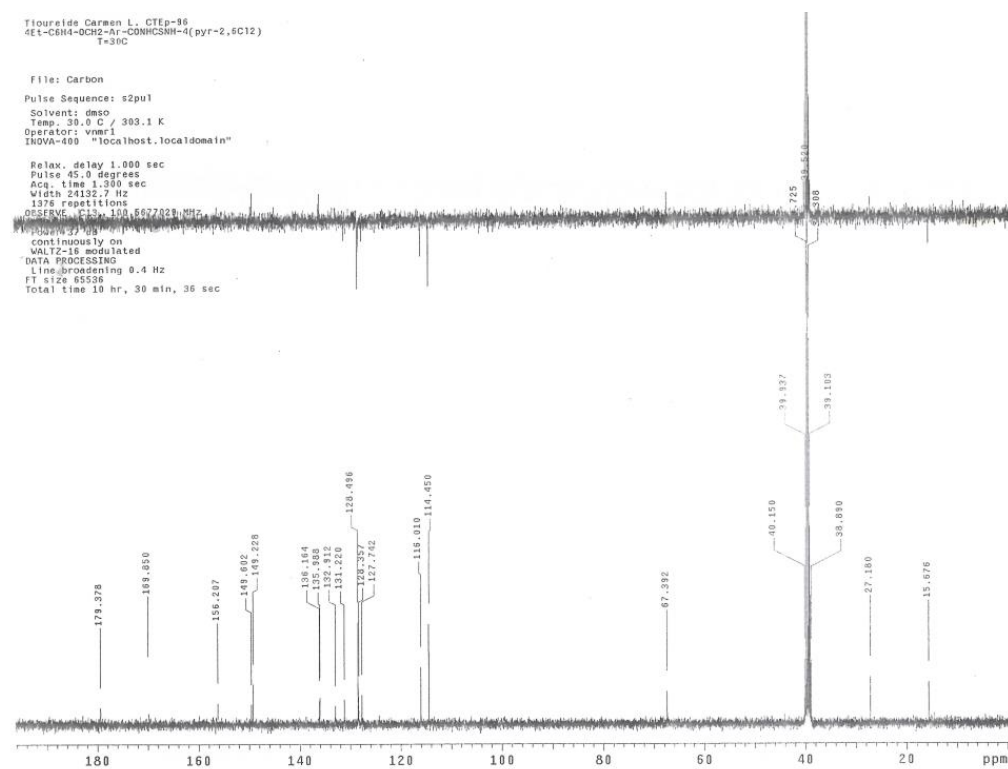

Figure S41. <sup>13</sup>C- NMR for the compound **1n**





## IR spectra for the compounds 1a – 1o

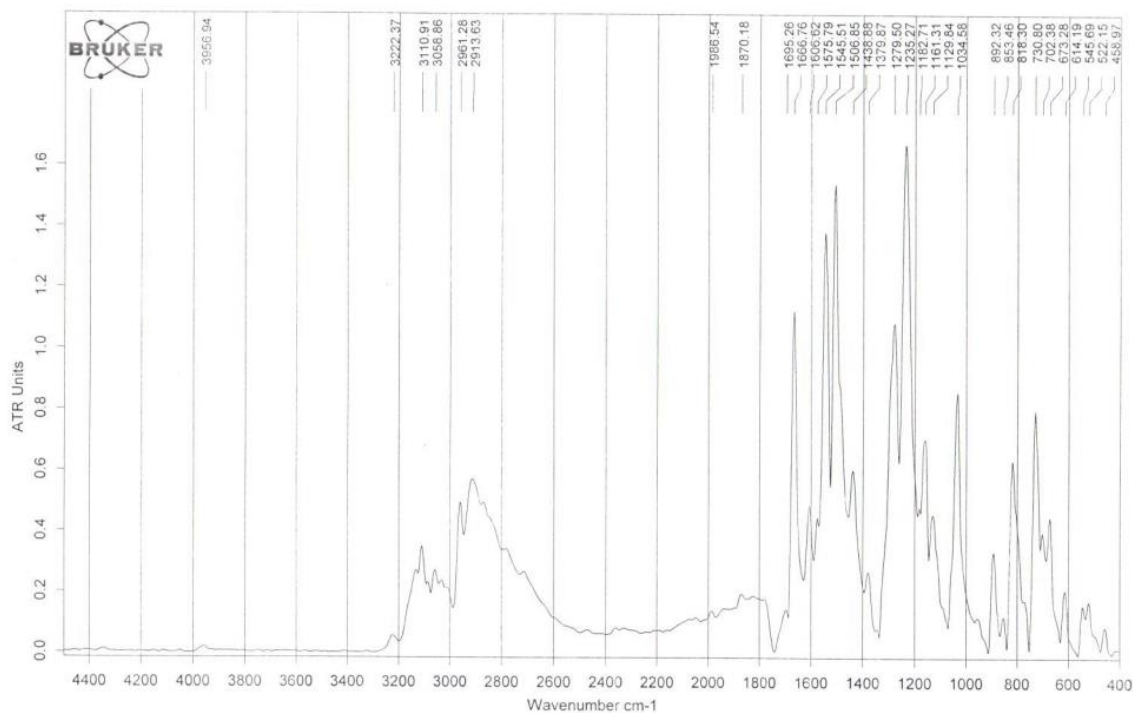

Figure S44. IR spectrum for the compound **1a**

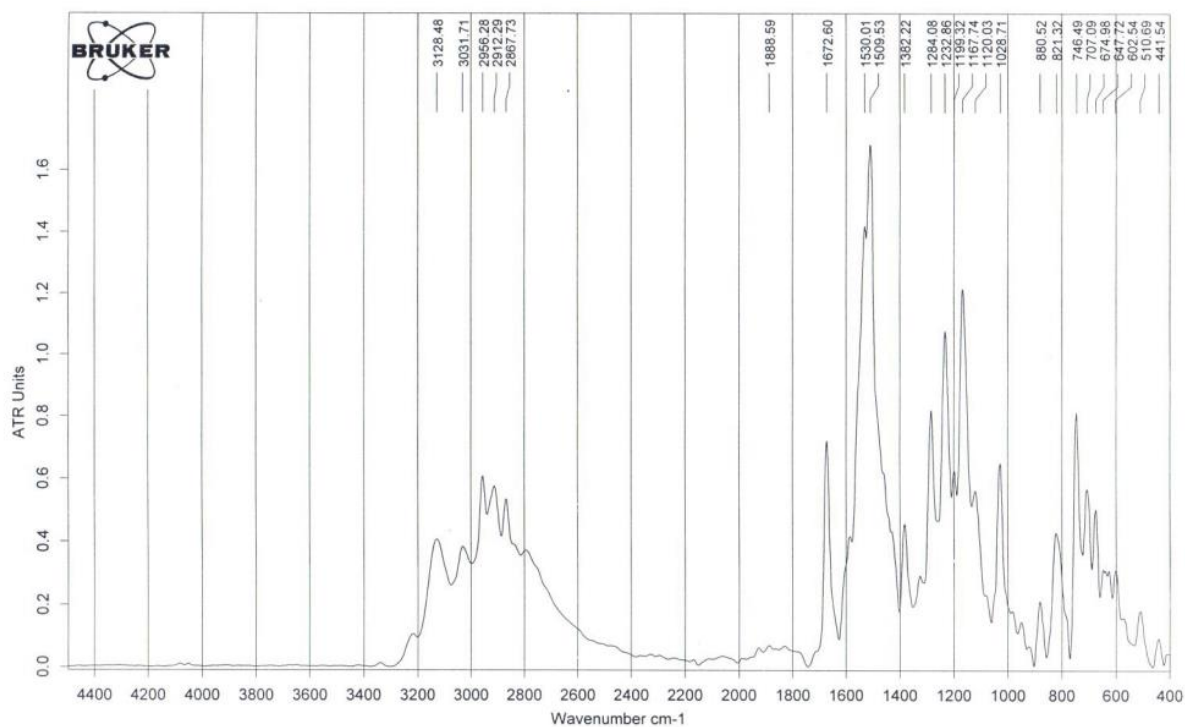

Figure S45. IR spectrum for the compound **1b**

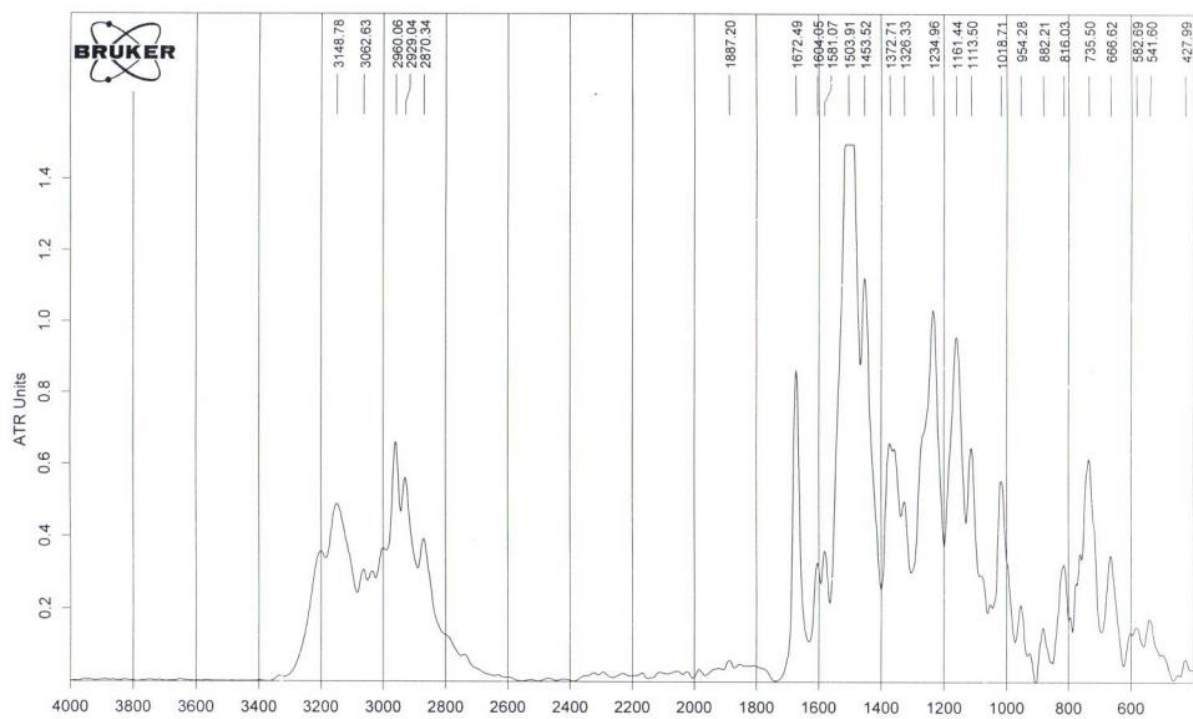

Figure S46. IR spectrum for the compound **1c**

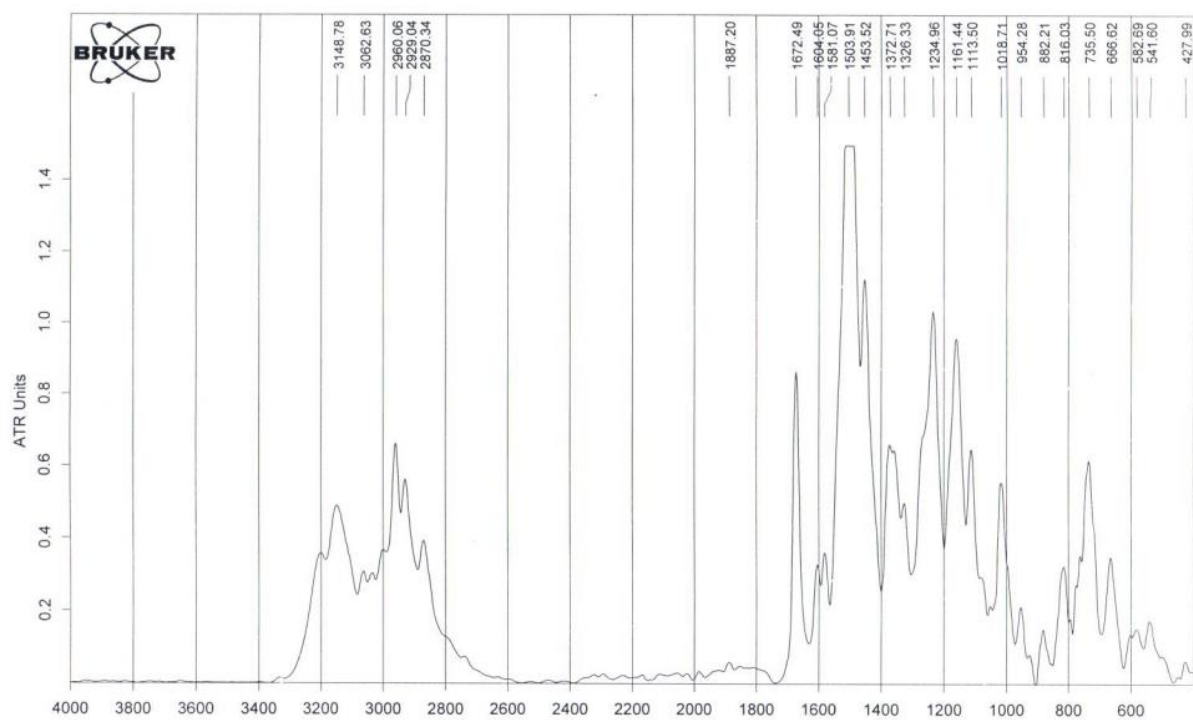

Figure S47. IR spectrum for the compound **1d**

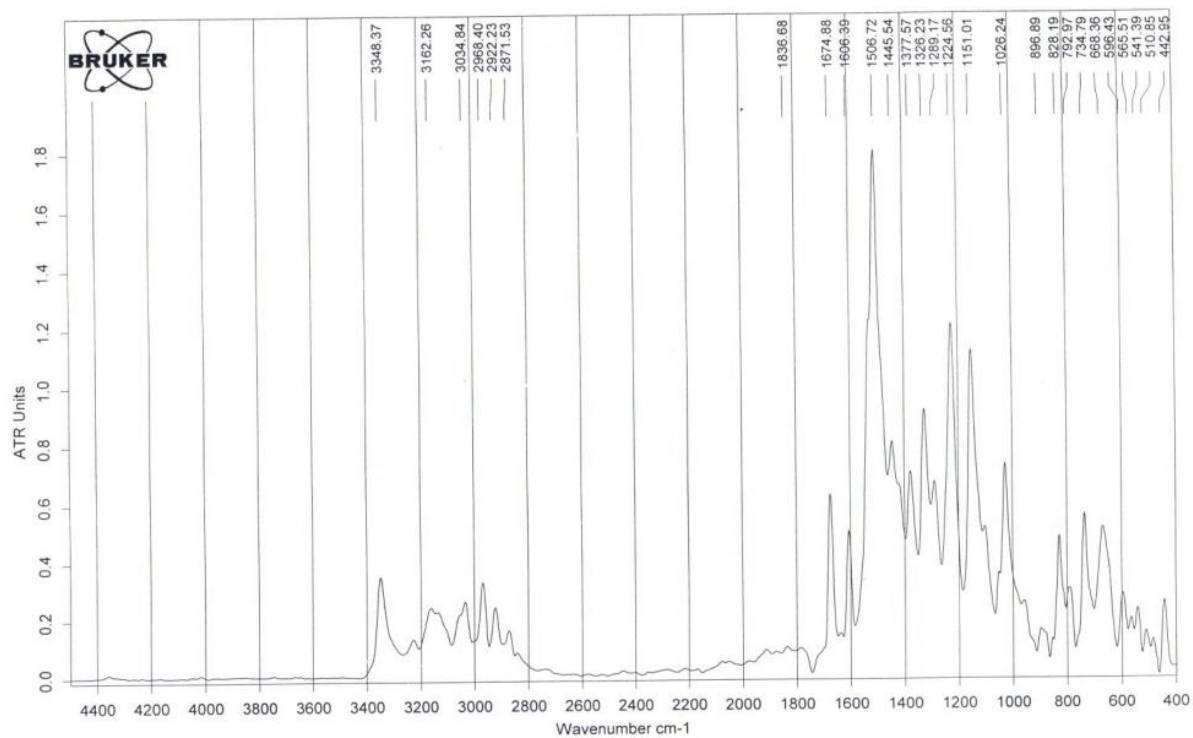

Figure S48. IR spectrum for the compound **1e**

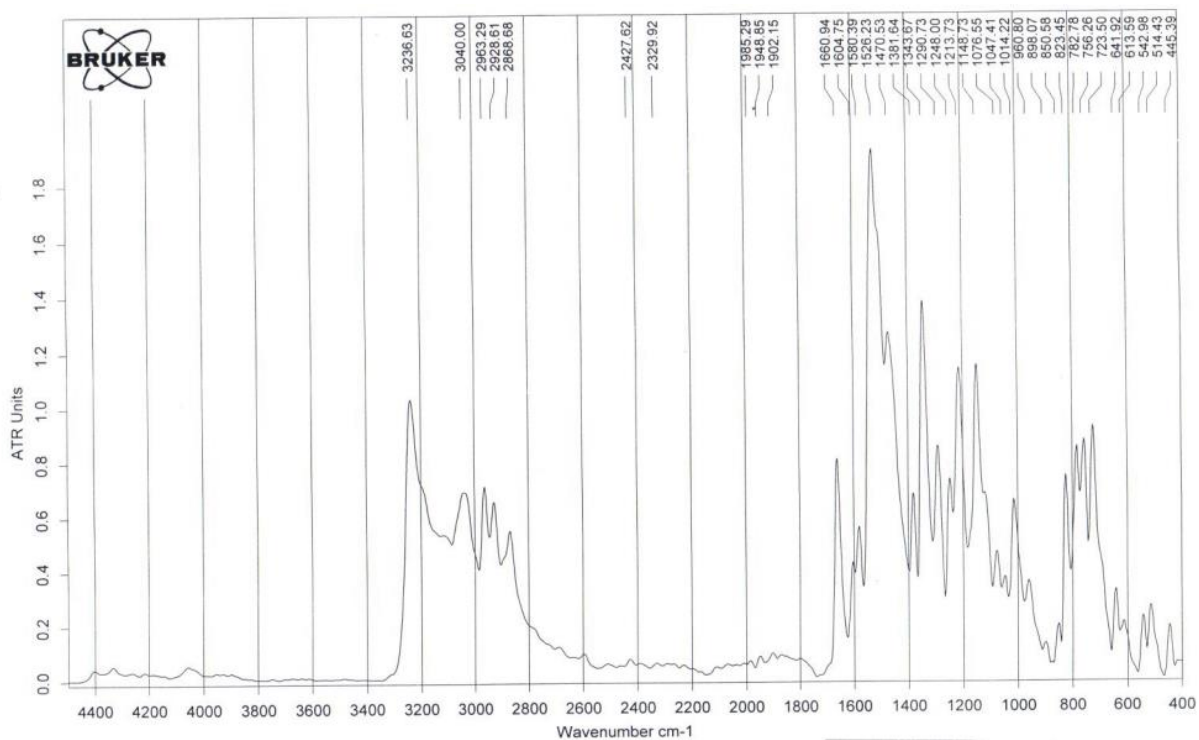

Figure S49. IR spectrum for the compound **1f**

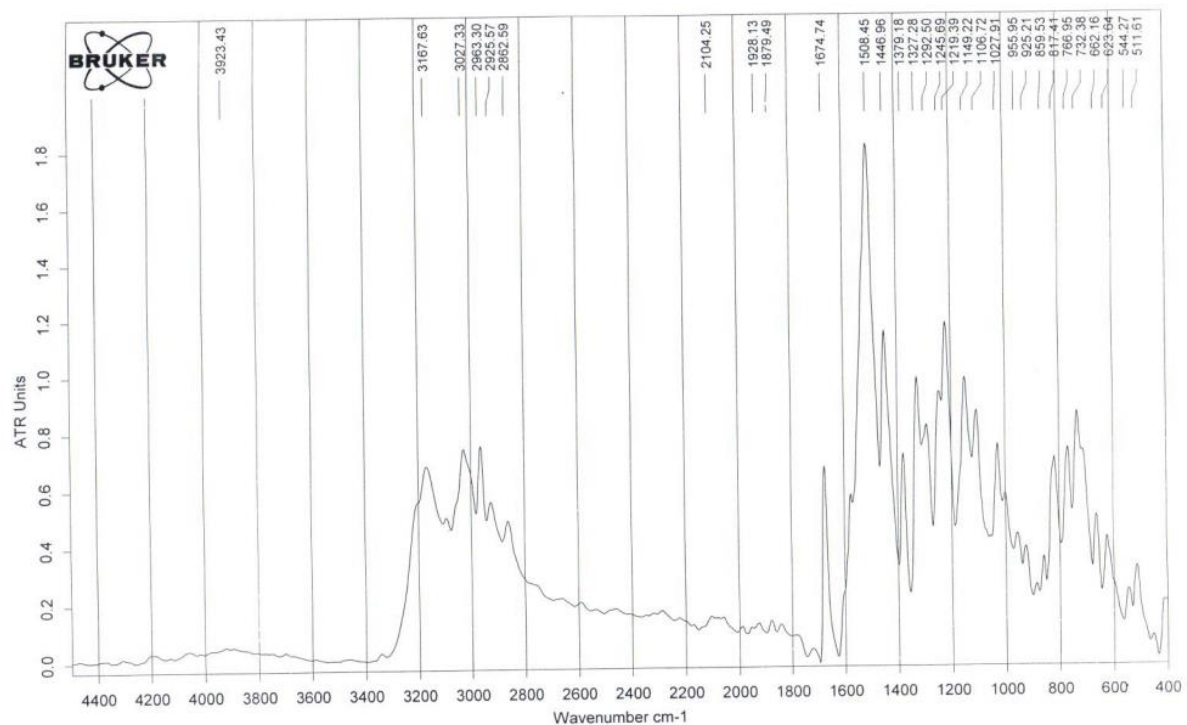

Figure S50. IR spectrum for the compound **1g**

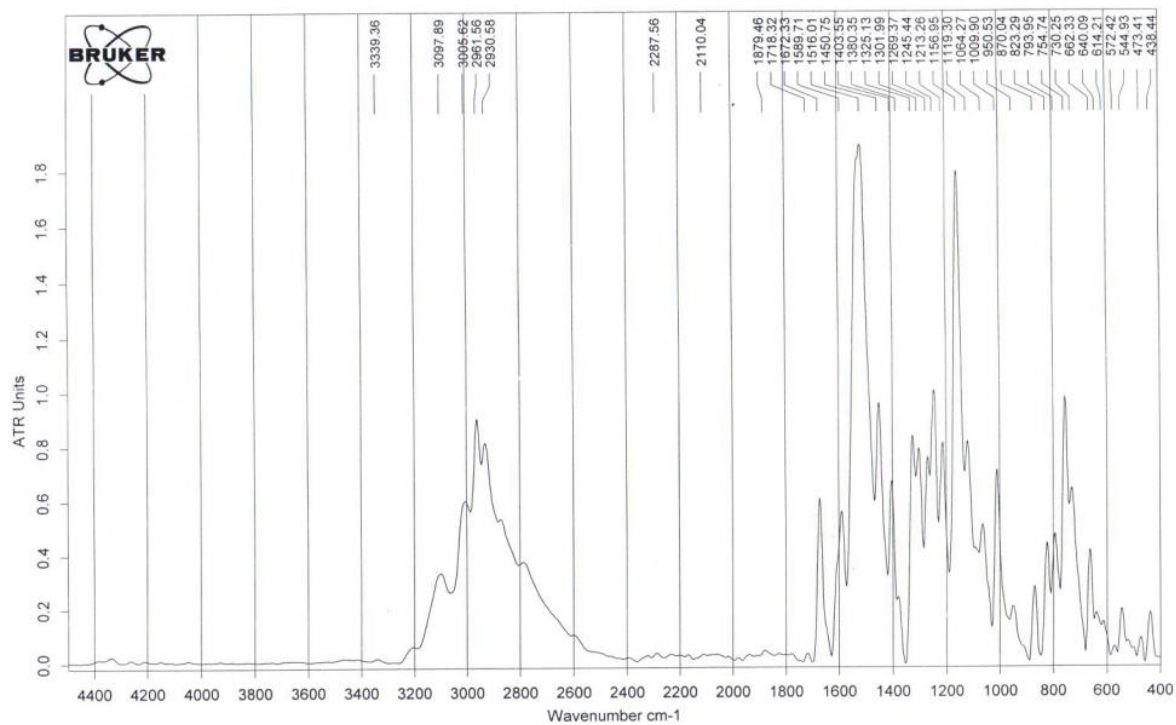

Figure S51. IR spectrum for the compound **1h**

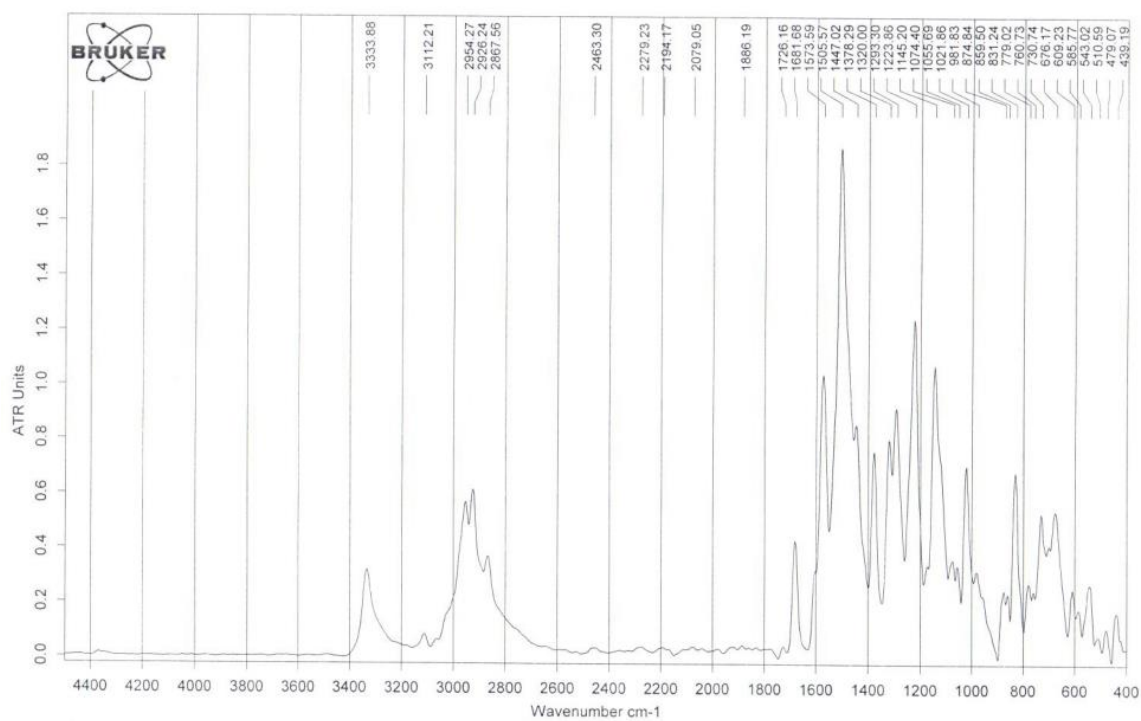

Figure S52. IR spectrum for the compound **1i**

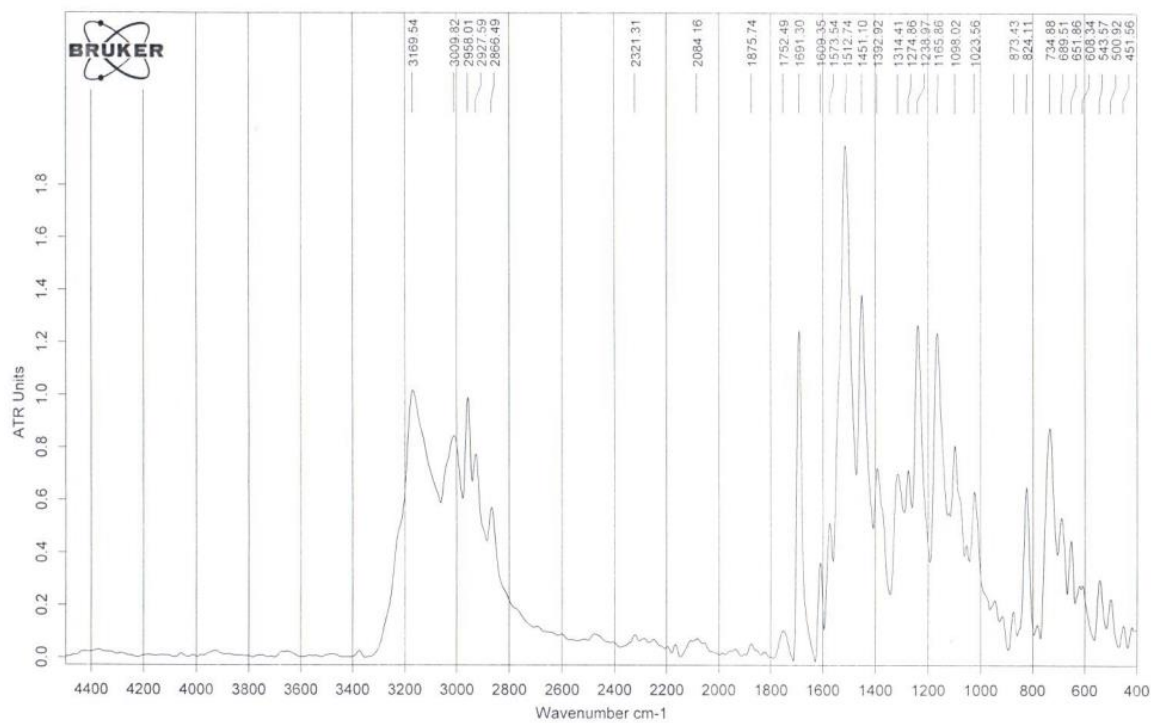

Figure S53. IR spectrum for the compound **1j**



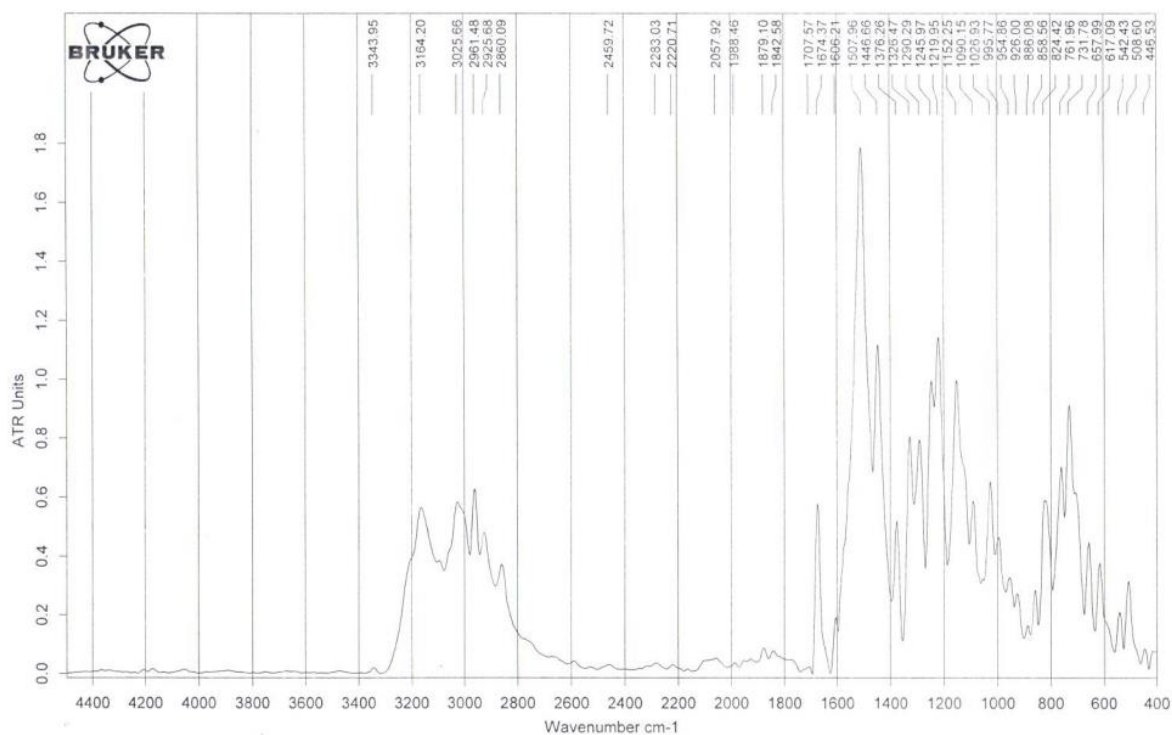

Figure S54. IR spectrum for the compound **1k**

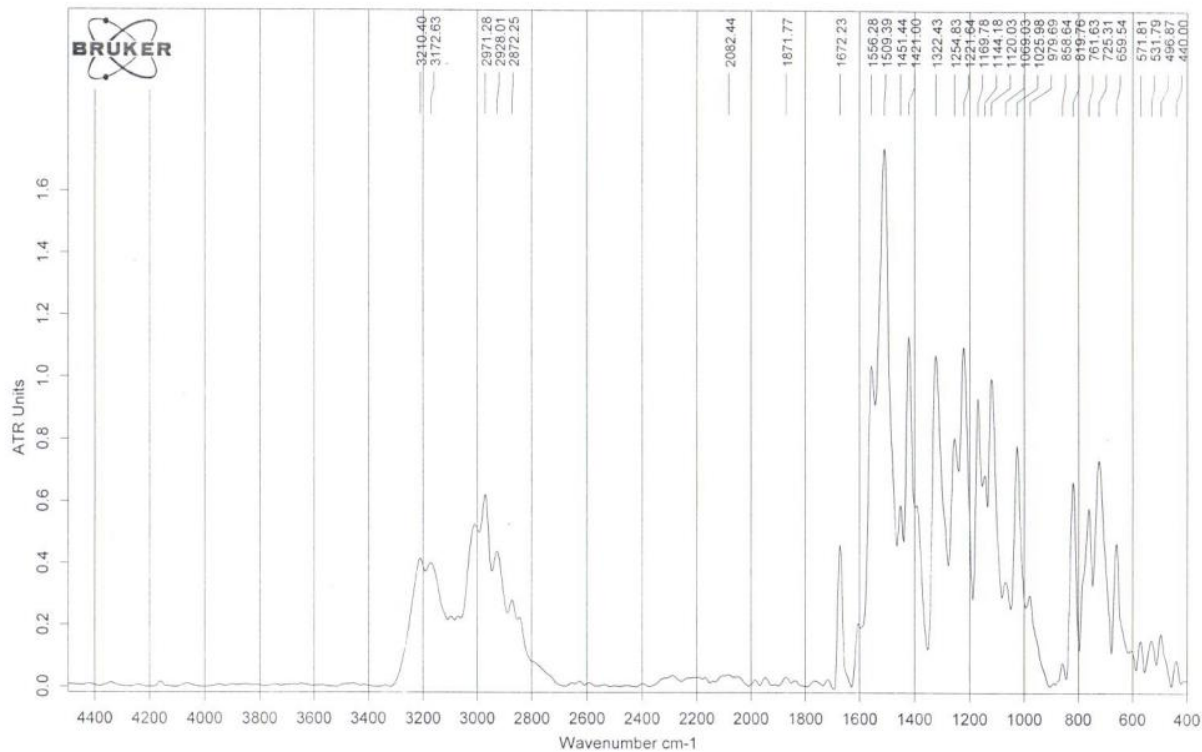

Figure S55. IR spectrum for the compound **1l**

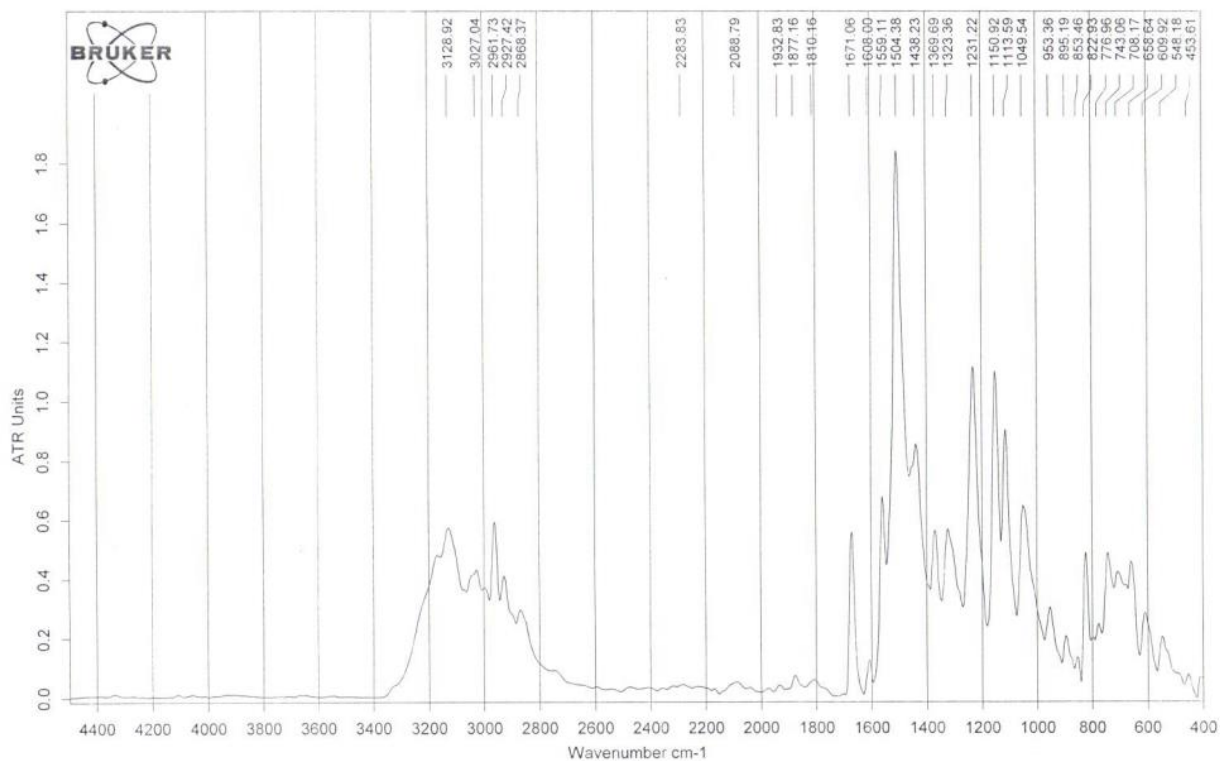

Figure S56. IR spectrum for the compound **1m**

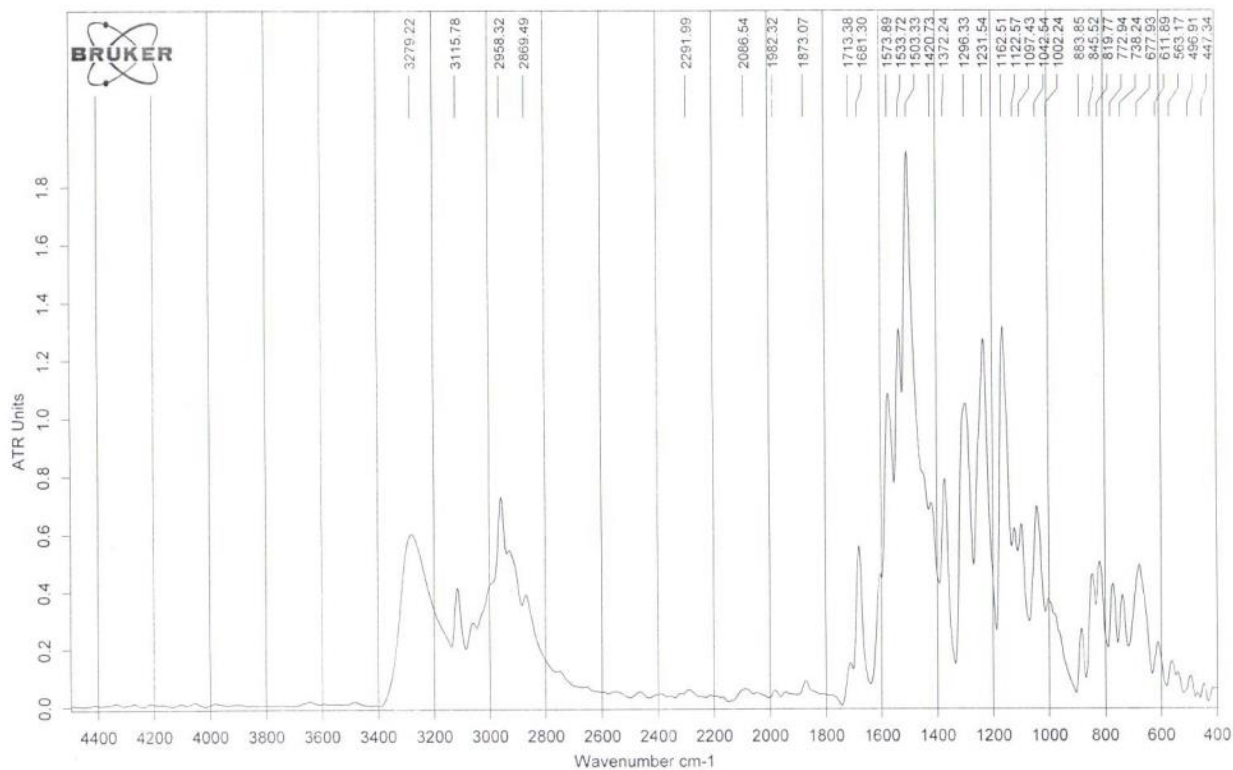

Figure S57. IR spectrum for the compound **1n**



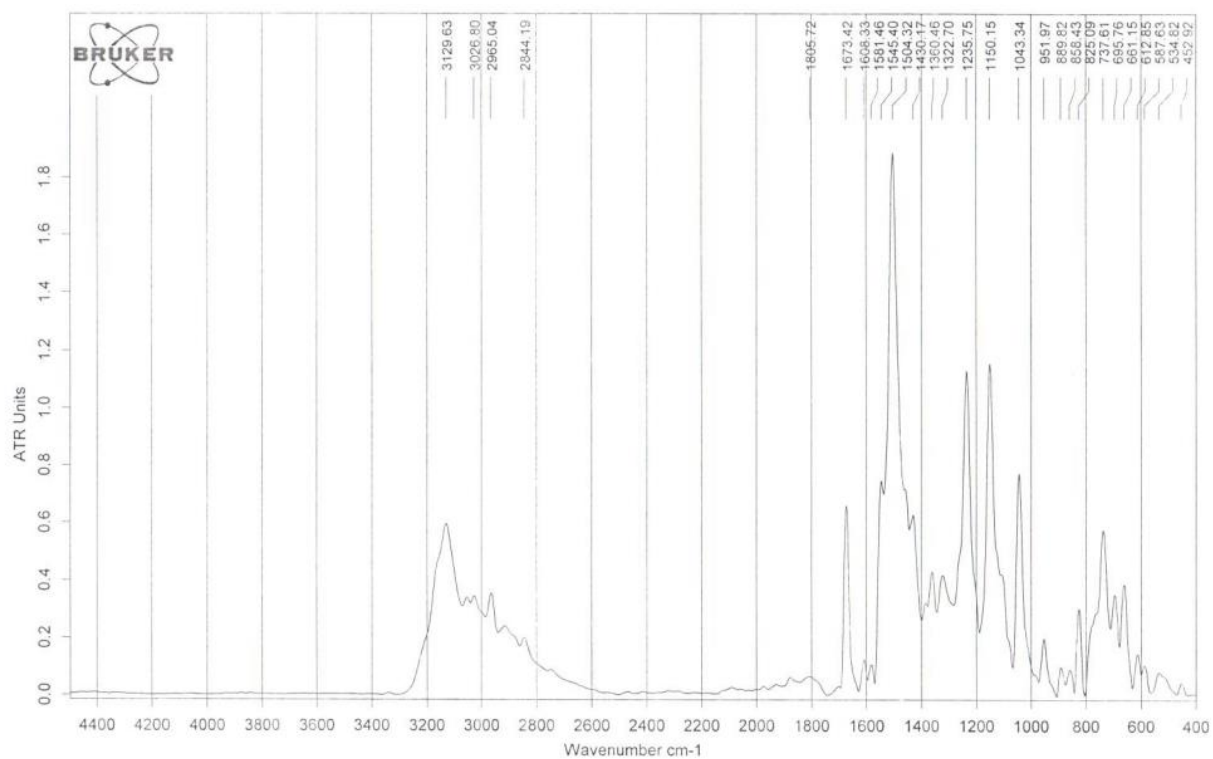

Figure S58. IR spectrum for the compound **1o**
